# Supplementary material for: Solvent-controlled catalytic divergent C–H alkylation of quinolones driven by unusual DMSO-promoted 1,3-heteroarene migration
Source: Royal Society of Chemistry journal article supplement (doi:10.1039/d4qo01980f), 2024-12-26
Supplement: d4qo01980f1.pdf [file d4qo01980f1.pdf]

## Supporting Information

### Solvent-controlled Catalytic Divergent C–H Alkylation of Quinolones Driven by Unusual DMSO-promoted 1,3-Heteroarene Migration

Ye Lim Kim,<sup>b</sup> Yuri Yun,<sup>b</sup> Seoung-Mi Choi,<sup>a</sup> and Ju Hyun Kim<sup>\*a</sup>

<sup>a</sup>Department of Chemistry, Dongguk University, 04620, Seoul, Korea, E-mail: [juhyunkim@dgu.edu](mailto:juhyunkim@dgu.edu)

<sup>b</sup>Department of Chemistry (BK21 Plus), Research Institute of Natural Science, Gyeongsang National University, 52828, Jinju, Korea

#### Table of Contents

|    |                                                                              |     |
|----|------------------------------------------------------------------------------|-----|
| 1. | General Information                                                          | S3  |
| 2. | Synthesis of Starting Materials                                              | S4  |
| 3. | Reaction Optimization                                                        | S11 |
| 4. | General Procedure                                                            | S13 |
|    | 4.1 Procedure for the synthesis of <b>3</b> via C–H bond activation          |     |
|    | 4.2 Procedure for the synthesis of <b>4</b> via directing group migration    |     |
|    | 4.3 Procedure for scale-up reaction of C–H bond activation                   |     |
|    | 4.4 Procedure for scale-up reaction of directing group migration             |     |
| 5. | Mechanistic Study                                                            | S20 |
|    | 5.1 Deuterium-labeling experiment                                            |     |
|    | 5.2 Heteroarene migration test using C2-alkylated product <b>3a</b>          |     |
|    | 5.3 Radical trapping experiments                                             |     |
|    | 5.4 Attempted Cp*Rh(III) catalysis using <i>N</i> -pyrimidyl indole <b>6</b> |     |
|    | 5.5 Rearrangement test using alkylated indole compound <b>7</b>              |     |
|    | 5.6 Cross-over experiments                                                   |     |
|    | 5.7 Directing ability test using compound <b>10</b>                          |     |

|     |                                                                          |      |
|-----|--------------------------------------------------------------------------|------|
|     | 5.8 NMR experiments                                                      |      |
| 6.  | Characterization Data of All Compounds                                   | S30  |
| 7.  | Single crystal X-ray diffraction data                                    | S52  |
| 8.  | Computational Details                                                    | S55  |
| 9.  | References                                                               | S78  |
| 10. | Copies of $^1\text{H}$ , $^{13}\text{C}$ and $^{19}\text{F}$ NMR Spectra | S80  |
| 11. | Copies of HRMS Spectra                                                   | S136 |

## 1. General Information

Unless otherwise noted, all reactions were carried out under an argon atmosphere in oven-dried Schlenk tubes. All reactions requiring heating were conducted in a pre-heated heating mantle, and reaction temperatures are reported as the temperature of the heat transfer medium surrounding the vessel. Dry solvents (<50 ppm H<sub>2</sub>O) were purchased from Acros Organics, Sigma-Aldrich, or TCI and stored over molecular sieves under argon atmosphere.

Commercially available chemicals were purchased from Acros Organics, Aldrich Chemical Co., Alfa Aesar, and TCI. Flash chromatography was performed using Merck silica gel (40–63 mesh).

The <sup>1</sup>H and <sup>13</sup>C NMR spectra were recorded on Bruker DRX-300 and Bruker DRX-500, and the chemical shifts (δ) in <sup>1</sup>H and <sup>13</sup>C NMR spectra are given in ppm relative to TMS. (CDCl<sub>3</sub>: δ <sup>1</sup>H = 7.26 ppm, δ <sup>13</sup>C = 77.16 ppm, DMSO-d<sub>6</sub>: δ <sup>1</sup>H = 2.50 ppm, δ <sup>13</sup>C = 39.51 ppm).

The high-resolution mass spectra were measured by electron ionization from JEOL (JMS-700).

## 2. Synthesis of Starting materials

### 2.1 General procedure for the preparation of Substituted 1-(2-Pyrimidinyl)-4(1*H*)-quinolinone (1)

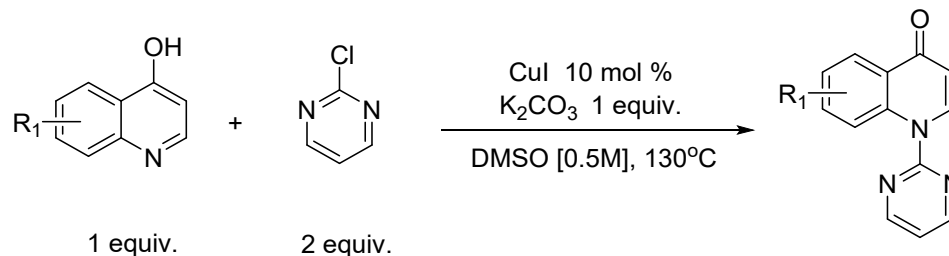

Substituted 2-hydroxypyridine (5 mmol), copper(I) iodide (10 mol %), and potassium carbonate (5 mmol) were taken in DMSO (10 mL), and 2-chloropyridine (10 mmol) was added to the resulting mixture. The mixture was stirred at 130 °C for 12 h under nitrogen atmosphere. The resulting mixture was allowed to cool to room temperature and then quenched with water. Extraction with ethyl acetate, concentrated under reduced pressure, and silica gel column purification with acetone : dichloromethane (DCM) afforded 1-(2-Pyrimidinyl)-4(1*H*)-quinolinone derivatives in 34–81% yields.

The following 1-(2-Pyrimidinyl)-4(1*H*)-quinolinone are known compounds and displayed spectroscopic properties in accord with published data.

- 1-(2-Pyrimidinyl)-4(1*H*)-quinolinone (**1a**) (CAS : 1687724-48-6)
- 6-Methyl-1-(2-pyrimidinyl)-4(1*H*)-quinolinone (**1b**) (CAS : 1687724-49-7)
- 6-Methoxy-1-(2-pyrimidinyl)-4(1*H*)-quinolinone (**1c**) (CAS : 1802551-21-8)
- 6-Chloro-1-(2-pyrimidinyl)-4(1*H*)-quinolinone (**1d**) (CAS :1687724-51-1)
- 6-Nitro-1-(2-pyrimidinyl)-4(1*H*)-quinolinone (**1f**) (CAS : 1687724-54-4)
- 7-Methoxy-1-(2-pyrimidinyl)-4(1*H*)-quinolinone (**1g**) (CAS : 1687724-59-9)
- 7-Chloro-1-(2-pyrimidinyl)-4(1*H*)-quinolinone (**1h**) (CAS : 1687724-56-6)
- 7-Bromo-1-(2-pyrimidinyl)-4(1*H*)-quinolinone (**1i**) (CAS : 1687724-57-7)
- 1-(2-Pyrimidinyl)-4(1*H*)-pyridinone (**1l**) (CAS : 29049-26-1)
- 1-(2-Pyrimidinyl)-2(1*H*)-pyridinone (**1m**) (CAS : 1862952-04-2)
- 2-(2-Pyrimidinyl)-1(2*H*)-isoquinolinone (**1n**) (CAS : 1687724-73-7)
- 1-(2-Pyridinyl)-4(1*H*)-quinolinone (**1s**) (CAS : 4547-00-6)

## Characterization data of compounds 1

### 1-(pyrimidin-2-yl)-6-(trifluoromethyl)quinolin-4(1H)-one (1e):

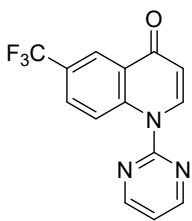

Slightly yellow solid (1.22 g, yield: 81%); mp 138–140 °C; purification by silica gel chromatography (Acetone:DCM= 1:5,  $R_f$  = 0.36);  $^1\text{H NMR}$  (300 MHz, Chloroform-*d*)  $\delta$  8.89 (d,  $J$  = 4.9 Hz, 2H), 8.74 – 8.65 (m, 1H), 8.45 (d,  $J$  = 8.2 Hz, 1H), 8.31 – 8.21 (m, 1H), 7.75 (dd,  $J$  = 9.2, 2.3 Hz, 1H), 7.43 (t,  $J$  = 4.8 Hz, 1H), 6.43 (d,  $J$  = 8.3 Hz, 1H);  $^{13}\text{C NMR}$  (75 MHz, Chloroform-*d*)  $\delta$  177.9, 159.3, 159.1, 141.8, 140.7, 128.0 (q,  $J$  = 3.4 Hz), 126.8 (q,  $J$  = 33.5 Hz), 126.3, 124.6 (q,  $J$  = 4.1 Hz), 123.9 (q,  $J$  = 270.8 Hz), 120.1, 119.5, 112.4, 77.6, 77.2, 76.7;  $^{19}\text{F NMR}$  (471 MHz, Chloroform-*d*)  $\delta$  -62.3; **HRMS** (EI-MS)  $m/z$  calcd for  $\text{C}_{14}\text{H}_8\text{F}_3\text{N}_3\text{O}$   $[\text{M}]^+$  291.0619, found 291.0617.

### 8-fluoro-1-(pyrimidin-2-yl)quinolin-4(1H)-one (1j):

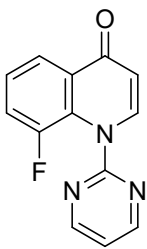

Slightly yellow solid (0.70 g, yield: 48%); mp 111–113 °C; purification by silica gel chromatography (Acetone:DCM= 1:5,  $R_f$  = 0.43);  $^1\text{H NMR}$  (300 MHz, Chloroform-*d*)  $\delta$  8.99 (d,  $J$  = 4.9 Hz, 1H), 8.63 (d,  $J$  = 4.8 Hz, 2H), 7.92 – 7.85 (m, 1H), 7.54 – 7.41 (m, 2H), 7.38 (d,  $J$  = 5.0 Hz, 1H), 7.18 (t,  $J$  = 4.8 Hz, 1H);  $^{13}\text{C NMR}$  (126 MHz, Chloroform-*d*)  $\delta$  164.4, 160.1, 159.1, 158.4 (q,  $J$  = 261.8 Hz), 157.1, 156.6, 151.2, 140.5 (q,  $J$  = 12.6 Hz), 126.7 (q,  $J$  = 8.1 Hz), 124.6, 124.5, 117.7 (q,  $J$  = 4.9 Hz), 117.6, 114.3 (q,  $J$  = 18.8 Hz), 112.9, 77.4, 77.2, 76.9;  $^{19}\text{F NMR}$  (471 MHz, Chloroform-*d*)  $\delta$  -124.2; **HRMS** (EI-MS)  $m/z$  calcd for  $\text{C}_{13}\text{H}_8\text{FN}_3\text{O}$   $[\text{M}]^+$  241.0651, found 241.0649.

### 6,7-dimethoxy-1-(pyrimidin-2-yl)quinolin-4(1H)-one (1k):

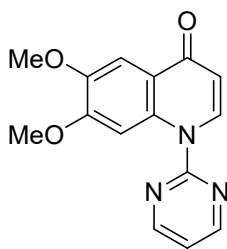

White solid (0.57 g, yield: 40%); mp 210–212 °C; purification by silica gel chromatography (Acetone:DCM= 1:3,  $R_f$  = 0.2);  $^1\text{H NMR}$  (300 MHz, Chloroform-*d*)  $\delta$  8.89 (d,  $J$  = 4.8 Hz, 2H), 8.42 (d,  $J$  = 8.2 Hz, 1H), 7.81 (d,  $J$  = 3.1 Hz, 2H), 7.38 (t,  $J$  = 4.8 Hz, 1H), 6.39 (d,  $J$  = 8.2 Hz, 1H), 4.01 (s, 3H), 3.90 (s, 3H);  $^{13}\text{C NMR}$  (75 MHz, Chloroform-*d*)  $\delta$  177.7, 159.5, 158.9, 152.8, 147.5, 140.1, 134.3, 121.1, 119.5, 111.1, 105.8, 100.4, 56.2, 56.1; **HRMS** (EI-MS)  $m/z$  calcd for  $\text{C}_{15}\text{H}_{13}\text{N}_3\text{O}_3$   $[\text{M}]^+$  283.0957, found 283.0954.

#### 1-(4-methylpyrimidin-2-yl)quinolin-4(1H)-one (**1t**):

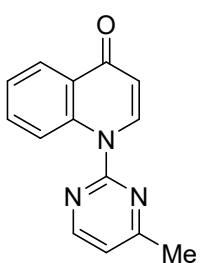

Slightly yellow solid (0.40 g, yield: 35%); mp 156–158 °C; purification by silica gel chromatography (Acetone:DCM= 1:5,  $R_f$  = 0.20);  $^1\text{H NMR}$  (300 MHz, Chloroform-*d*)  $\delta$  8.71 (d,  $J$  = 5.1 Hz, 1H), 8.45 (dd,  $J$  = 8.1, 1.7 Hz, 1H), 8.38 (d,  $J$  = 8.2 Hz, 1H), 8.07 (dd,  $J$  = 8.7, 0.9 Hz, 1H), 7.59 (ddd,  $J$  = 8.8, 7.0, 1.7 Hz, 1H), 7.45 – 7.38 (m, 1H), 7.23 (d,  $J$  = 5.1 Hz, 1H), 6.42 (d,  $J$  = 8.2 Hz, 1H), 2.65 (s, 3H);  $^{13}\text{C NMR}$  (75 MHz, Chloroform-*d*)  $\delta$  178.9, 170.4, 159.3, 158.5, 141.4, 139.1, 131.9, 126.7, 126.7, 124.8, 119.4, 118.2, 111.5, 24.4; **HRMS** (EI-MS)  $m/z$  calcd for  $\text{C}_{14}\text{H}_{11}\text{N}_3\text{O}$   $[\text{M}]^+$  237.0902, found 237.0899.

### 1-(5-methylpyrimidin-2-yl)quinolin-4(1H)-one (1u):

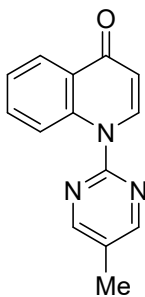

Slightly yellow solid (0.93 g, yield: 79%); mp 184–186 °C; purification by silica gel chromatography (Acetone:DCM= 1:5,  $R_f$  = 0.23);  $^1\text{H NMR}$  (300 MHz, Chloroform-*d*)  $\delta$  8.69 (d,  $J$  = 0.8 Hz, 2H), 8.44 (dd,  $J$  = 8.0, 1.7 Hz, 1H), 8.30 (d,  $J$  = 8.2 Hz, 1H), 7.99 (dd,  $J$  = 8.8, 1.0 Hz, 1H), 7.57 (ddd,  $J$  = 8.8, 7.0, 1.7 Hz, 1H), 7.40 (ddd,  $J$  = 8.1, 7.0, 1.0 Hz, 1H), 6.41 (d,  $J$  = 8.1 Hz, 1H), 2.43 (s, 3H);  $^{13}\text{C NMR}$  (75 MHz, Chloroform-*d*)  $\delta$  178.8, 159.1, 157.6, 141.3, 139.1, 131.9, 129.7, 126.7, 124.7, 118.0, 111.4, 15.4; **HRMS** (EI-MS)  $m/z$  calcd for  $\text{C}_{14}\text{H}_{11}\text{N}_3\text{O}$   $[\text{M}]^+$  237.0902, found 237.0904.

### 7-methoxy-1-(5-methylpyrimidin-2-yl)quinolin-4(1H)-one (1v):

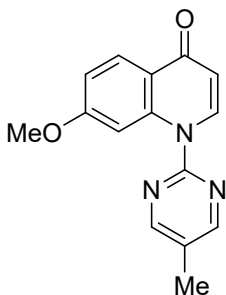

Slightly yellow solid (0.83 g, yield: 40%); mp 155–157 °C; purification by silica gel chromatography (Acetone:DCM= 1:3,  $R_f$  = 0.5);  $^1\text{H NMR}$  (300 MHz, Chloroform-*d*)  $\delta$  8.70 – 8.65 (m, 2H), 8.36 (d,  $J$  = 9.0 Hz, 1H), 8.24 (d,  $J$  = 8.2 Hz, 1H), 7.51 (d,  $J$  = 2.3 Hz, 1H), 6.99 (dd,  $J$  = 9.0, 2.3 Hz, 1H), 6.32 (d,  $J$  = 8.2 Hz, 1H), 3.82 (s, 3H), 2.42 (s, 3H);  $^{13}\text{C NMR}$  (75 MHz, Chloroform-*d*)  $\delta$  178.3, 162.5, 159.0, 157.6, 141.1, 140.6, 129.6, 128.4, 120.9, 113.0, 111.2, 101.1, 55.5, 15.3; **HRMS** (EI-MS)  $m/z$  calcd for  $\text{C}_{14}\text{H}_{11}\text{N}_3\text{O}$   $[\text{M}]^+$  267.1008, found 267.1008.



**1-(5-bromopyrimidin-2-yl)quinolin-4(1H)-one (1w):**

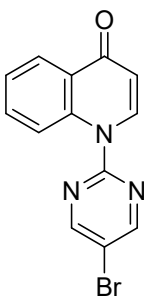

White solid (1.03 g, yield: 68%); mp 166–168 °C; purification by silica gel chromatography (Acetone:DCM= 1:5,  $R_f$  = 0.38);  $^1\text{H NMR}$  (300 MHz, Chloroform-*d*)  $\delta$  8.90 (s, 2H), 8.44 (dd,  $J$  = 8.0, 1.7 Hz, 1H), 8.37 (d,  $J$  = 8.3 Hz, 1H), 8.10 (d,  $J$  = 8.7 Hz, 1H), 7.60 (ddd,  $J$  = 8.7, 7.0, 1.7 Hz, 1H), 7.49 – 7.35 (m, 1H), 6.42 (d,  $J$  = 8.2 Hz, 1H);  $^{13}\text{C NMR}$  (75 MHz, Chloroform-*d*)  $\delta$  178.8, 159.6, 157.7, 140.9, 138.7, 132.1, 126.8, 126.7, 125.1, 118.2, 117.7, 112.1; **HRMS** (EI-MS)  $m/z$  calcd for  $\text{C}_{13}\text{H}_8\text{BrN}_3\text{O}$   $[\text{M}]^+$  300.9851, found 300.9849.

**1-(pyrazin-2-yl)quinolin-4(1H)-one (1x):**

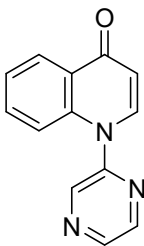

White solid (0.38 g, yield: 34%); mp 175–177 °C; purification by silica gel chromatography (Acetone:DCM= 1:3,  $R_f$  = 0.25);  $^1\text{H NMR}$  (300 MHz, Chloroform-*d*)  $\delta$  8.85 (d,  $J$  = 1.4 Hz, 1H), 8.74 (d,  $J$  = 2.5 Hz, 1H), 8.69 (dd,  $J$  = 2.5, 1.4 Hz, 1H), 8.45 (dd,  $J$  = 8.0, 1.7 Hz, 1H), 7.79 (d,  $J$  = 8.0 Hz, 1H), 7.55 (ddd,  $J$  = 8.6, 7.0, 1.7 Hz, 1H), 7.41 (ddd,  $J$  = 8.2, 7.1, 1.1 Hz, 1H), 7.24 (d,  $J$  = 8.6 Hz, 1H), 6.42 (d,  $J$  = 8.0 Hz, 1H);  $^{13}\text{C NMR}$  (75 MHz, Chloroform-*d*)  $\delta$  178.4, 150.1, 144.6, 144.4, 142.9, 141.1, 139.8, 132.4, 127.2, 126.6, 124.9, 116.1, 111.8; **HRMS** (EI-MS)  $m/z$  calcd for  $\text{C}_{23}\text{H}_{19}\text{N}_3\text{O}_2$   $[\text{M}]^+$  223.0746, found 223.0748.

**1-(benzo[d]thiazol-2-yl)quinolin-4(1H)-one (1y):**

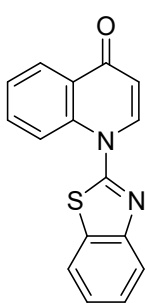

White solid (1.36 g, yield: 81%); mp 129–131 °C; purification by silica gel chromatography (Acetone:DCM= 1:5,  $R_f$  = 0.5);  $^1\text{H NMR}$  (300 MHz, Chloroform-*d*)  $\delta$  8.45 (dd,  $J$  = 8.0, 1.7 Hz, 1H), 8.13 – 8.07 (m, 1H), 7.94 (dd,  $J$  = 8.2, 1.5 Hz, 2H), 7.88 – 7.82 (m, 1H), 7.62 (ddt,  $J$  = 8.2, 7.3, 1.6 Hz, 2H), 7.54 (ddd,  $J$  = 8.6, 7.3, 1.3 Hz, 1H), 7.45 (ddd,  $J$  = 8.1, 7.1, 1.1 Hz, 1H), 6.45 (d,  $J$  = 8.0 Hz, 1H);  $^{13}\text{C NMR}$  (75 MHz, Chloroform-*d*)  $\delta$  178.3, 160.0, 150.0, 141.4, 140.0, 134.7, 132.9, 127.5, 126.9, 126.8, 126.4, 125.3, 124.1, 121.9, 117.1, 112.1; **HRMS** (EI-MS)  $m/z$  calcd for  $\text{C}_{16}\text{H}_{10}\text{N}_2\text{OS}$   $[\text{M}]^+$  278.0514, found 278.0510.

### 3. Reaction Optimization

Table S1. Optimization of reaction conditions<sup>a</sup>

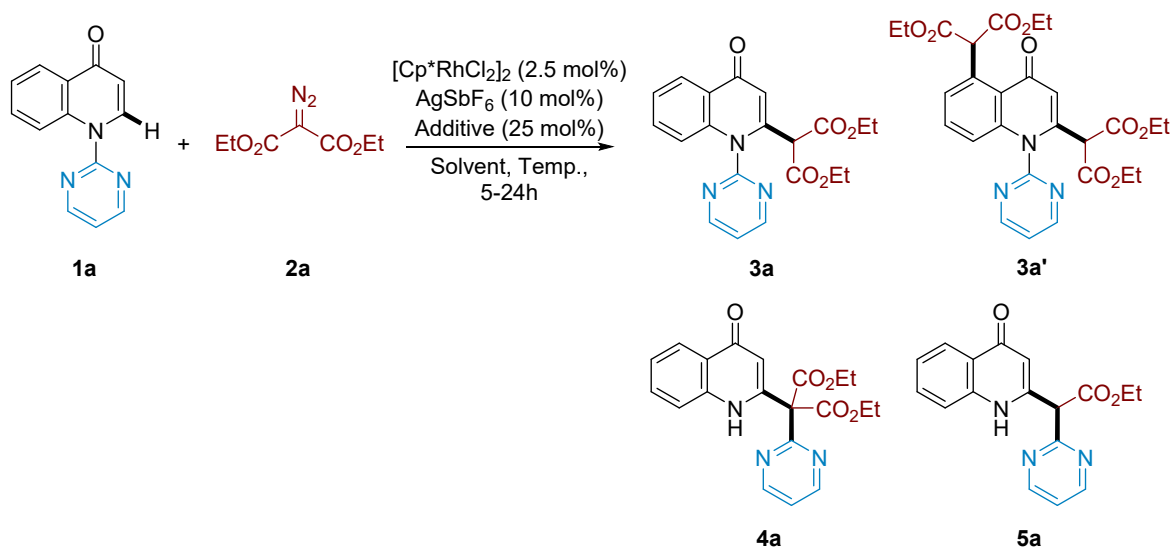

| Entry          | Additives             | Solvent        | Temp.<br>(°C) | Yield (%) <sup>f</sup> |                   |    |    |
|----------------|-----------------------|----------------|---------------|------------------------|-------------------|----|----|
|                |                       |                |               | 3a                     | 3a'               | 4a | 5a |
| 1              | -                     | DCE            | 80            | -                      | -                 | -  | -  |
| 2              | PivOH                 | DCE            | 80            | 34                     | 19                | -  | -  |
| 3              | PivOH                 | DCM            | 30            | <b>79</b>              | 17                | -  | -  |
| 4              | PivOH                 | DCM<br>(0.05M) | 30            | 78                     | 18                | -  | -  |
| 5              | PivOH                 | DCM<br>(0.2M)  | 30            | 75                     | 18                | -  | -  |
| 6              | PivOH                 | DCM            | r.t           | 70                     | 19                | -  | -  |
| 7              | 1-AdCO <sub>2</sub> H | DCM            | 30            | 71                     | 20                | -  | -  |
| 8 <sup>b</sup> | PivOH<br>/NaOMe       | DCM            | 30 to 40      | (78) <sup>g</sup>      | (16) <sup>g</sup> | -  | -  |

|                   |                              |                           |          |                   |                   |    |    |
|-------------------|------------------------------|---------------------------|----------|-------------------|-------------------|----|----|
| 9 <sup>b</sup>    | PivOH<br>/KO <sup>t</sup> Bu | DCM                       | 30 to 40 | (78) <sup>g</sup> | (13) <sup>g</sup> | -  | -  |
| 10 <sup>c</sup>   | 1-AdCO <sub>2</sub> H        | MeCN                      | 60       | 46                | 6                 | 29 | -  |
| 11 <sup>c</sup>   | 1-AdCO <sub>2</sub> H        | MeOH                      | 60       | trace             | 0                 | 39 | 39 |
| 12 <sup>c</sup>   | AcOH                         | MeOH                      | 60       | trace             | 0                 | 20 | 6  |
| 13 <sup>c</sup>   | 1-AdCO <sub>2</sub> H        | EtOH                      | 60       | trace             | 0                 | 50 | 14 |
| 14 <sup>d</sup>   | PivOH                        | DMSO                      | 60       | 0                 | 0                 | 29 | 0  |
| 15 <sup>d</sup>   | PivOH                        | EtOH/DMSO<br>= 3/1        | 60       | trace             | 0                 | 60 | 0  |
| 16 <sup>d</sup>   | PivOH                        | EtOH/DMSO<br>= 9/1        | 60       | trace             | 0                 | 74 | 0  |
| 17 <sup>d,e</sup> | PivOH<br>(1 equiv.)          | EtOH/DMSO<br>= 9/1        | 60       | trace             | 0                 | 63 | 0  |
| 18 <sup>d</sup>   | PivOH                        | EtOH/DMSO<br>=9/1         | 70       | 0                 | 0                 | 77 | 0  |
| 19 <sup>d</sup>   | PivOH                        | EtOH/DMSO<br>=9/1 (0.05M) | 70       | 0                 | 0                 | 70 | 0  |

<sup>a</sup>Reaction conditions A: **1a** (0.1 mmol), **2a** (0.12 mmol), [Cp\*RhCl<sub>2</sub>]<sub>2</sub> (2.5 mol%), AgSbF<sub>6</sub> (10 mol%), and acid (25 mol%) in solvent (1.0 mL). <sup>b</sup>After proceeding to entry 3 (check by TLC), add base (0.1 mmol). <sup>c</sup>Reaction conditions B: **1a** (0.1 mmol), **2a** (0.14 mmol), [Cp\*RhCl<sub>2</sub>]<sub>2</sub> (5.0 mol%), AgSbF<sub>6</sub> (20 mol%), and acid (50 mol%). <sup>d</sup>**2a** (0.16 mmol) was used for reaction conditions B. <sup>e</sup>Acid (0.1 mmol). <sup>f</sup>Isolated yield after column chromatography. <sup>g</sup>NMR yield: Determined using CH<sub>2</sub>Br<sub>2</sub>(2H, 4.93 ppm).

## 4. General Procedure

### 4.1 Procedure for the synthesis of **3** via Cp\*Rh-catalyzed C–H bond alkylation

An oven-dried Schlenk tube was evacuated and flushed with argon three times. Then, it was evacuated and transferred to the glovebox. AgSbF<sub>6</sub> (6.9 mg, 0.02 mmol), [Cp\*RhCl<sub>2</sub>]<sub>2</sub> (3.1 mg, 0.005 mmol) were added, and the Schlenk tube was transferred to the fume hood. 1-(2-Pyrimidinyl)-4(1*H*)-quinolinone **1** (0.2 mmol), diethyl 2-diazomalonate **2** (0.24 mmol), PivOH (5.1mg, 0.05 mmol) and DCM (2.0 mL) were added under Ar. The reaction mixture was stirred at 30 °C for 5–12 h. The reaction was quenched with saturated NaHCO<sub>3</sub> solution, and the mixture was extracted three times with DCM. The combined organic layers were washed with brine, dried with anhydrous MgSO<sub>4</sub>, and the solvents evaporated to dryness. The crude product was purified by column chromatography on silica gel using Acetone:DCM mixture as the eluent.

### 4.2 Procedure for the synthesis of **4** via Cp\*Rh-catalyzed C–H alkylation/[1,3]-heteroarene migration cascade

An oven-dried Schlenk tube was evacuated and flushed with argon three times. Then, it was evacuated and transferred to the glovebox. AgSbF<sub>6</sub> (13.7 mg, 0.04 mmol), [Cp\*RhCl<sub>2</sub>]<sub>2</sub> (6.2 mg, 0.01 mmol) were added, and the Schlenk tube was transferred to the fume hood. 1-(2-Pyrimidinyl)-4(1*H*)-quinolinone **1** (0.2 mmol), diethyl 2-diazomalonate **2** (0.32 mmol), PivOH (10.2mg, 0.1 mmol), EtOH (1.8 mL) and DMSO (0.2 mL) were added under Ar. The reaction mixture was stirred at 70 °C for 24 h. The reaction was quenched with saturated NaHCO<sub>3</sub> solution, and the mixture was extracted three times with ethyl acetate. The combined organic layers were washed with brine, dried with anhydrous MgSO<sub>4</sub>, and the solvents evaporated to dryness. The crude product was purified by column chromatography

on silica gel using Acetone:DCM mixture as the eluent.

#### 4.3 Procedure of scale-up (4 mmol) reaction for the synthesis of 3a

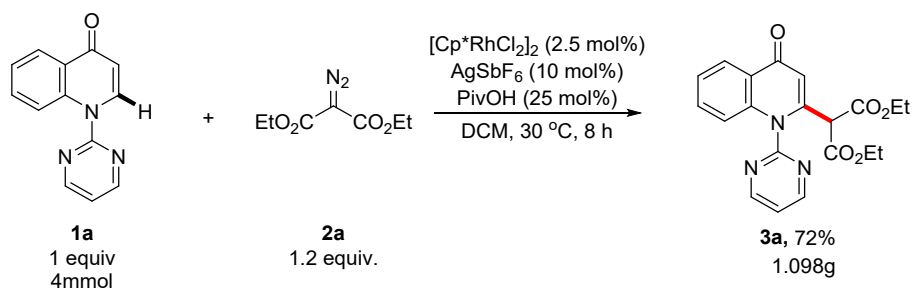

A two-neck round bottom flask was evacuated and flushed with argon three times. Then, it was evacuated and transferred to the glovebox.  $\text{AgSbF}_6$  (137.4 mg, 0.4 mmol),  $[\text{Cp}^*\text{RhCl}_2]_2$  (61.8 mg, 0.1 mmol) were added, and the Schlenk tube was transferred to the fume hood. 1-(2-Pyrimidinyl)-4(1*H*)-quinolinone **1** (4.0 mmol), diethyl 2-diazomalonate **2** (4.8 mmol),  $\text{PivOH}$  (102.1 mg, 1.0 mmol) and DCM (40 mL) were added under Ar. The reaction mixture was stirred at 30 °C for 8 h. The reaction was quenched with saturated  $\text{NaHCO}_3$  solution, and the mixture was extracted three times with DCM. The combined organic layers were washed with brine, dried with anhydrous  $\text{MgSO}_4$ , and the solvents evaporated to dryness. The crude product was purified by column chromatography on silica gel using Acetone:DCM = 1:5 as the eluent. The product **3a** was isolated in 72% yield (1.098 g).

#### 4.4 Procedure of scale-up (4 mmol) reaction for the synthesis of 4a

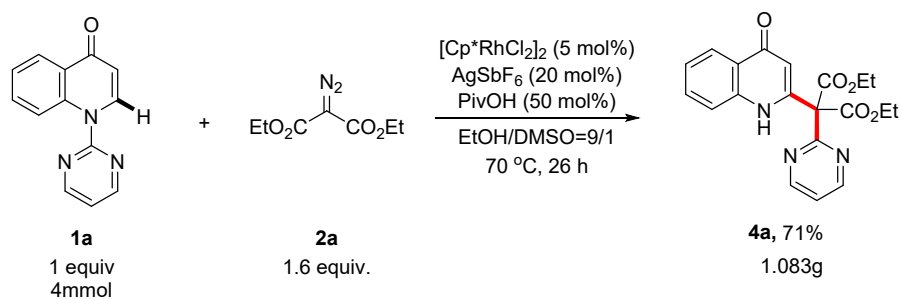

A two-neck round bottom flask was evacuated and flushed with argon three times. Then, it was evacuated and transferred to the glovebox. AgSbF<sub>6</sub> (274.9 mg, 0.8 mmol), [Cp\*RhCl<sub>2</sub>]<sub>2</sub> (123.6 mg, 0.2 mmol) were added, and the Schlenk tube was transferred to the fume hood. 1-(2-Pyrimidinyl)-4(1H)-quinolinone **1** (4 mmol), diethyl 2-diazomalonate **2** (6.4 mmol), PivOH (204.3 mg, 2.0 mmol), EtOH (36 mL) and DMSO (4 mL) were added under Ar. The reaction mixture was stirred at 70 °C for 26 h. The reaction was quenched with saturated NaHCO<sub>3</sub> solution, and the mixture was extracted three times with ethyl acetate. The combined organic layers were washed with brine, dried with anhydrous MgSO<sub>4</sub>, and the solvents evaporated to dryness. The crude product was purified by column chromatography on silica gel using Acetone:DCM = 1:5 as the eluent. The product **4a** was isolated in 71% yield (1.083 g).

## 4.5 Procedure for application toward the synthesis of distomadine analog

### 4.5.1 Procedure for the synthesis of **3y** via dialkylation

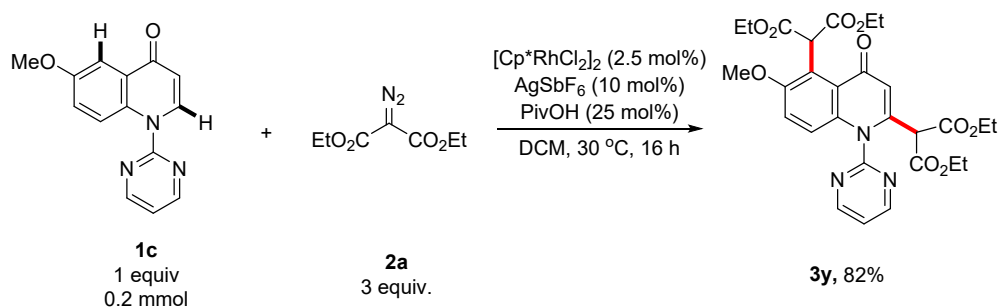

An oven-dried Schlenk tube was evacuated and flushed with argon three times. Then, it was evacuated and transferred to the glovebox.  $\text{AgSbF}_6$  (6.9 mg, 0.02 mmol),  $[\text{Cp}^*\text{RhCl}_2]_2$  (3.1 mg, 0.005 mmol) were added, and the Schlenk tube was transferred to the fume hood. 1-(2-Pyrimidinyl)-4(1H)-quinolinone **1** (0.2 mmol), diethyl 2-diazomalonate **2** (0.24 mmol),  $\text{PivOH}$  (5.1 mg, 0.05 mmol) and  $\text{DCM}$  (2.0 mL) were added under Ar. The reaction mixture was stirred at  $30\text{ }^\circ\text{C}$  for 16 h. The reaction was quenched with saturated  $\text{NaHCO}_3$  solution, and the mixture was extracted three times with  $\text{DCM}$ . The combined organic layers were washed with brine, dried with anhydrous  $\text{MgSO}_4$ , and the solvents evaporated to dryness. The crude product was purified by column chromatography on silica gel using Acetone: $\text{DCM}$  = 1:5 as the eluent.



#### 4.5.2 Procedure for the synthesis of **4** via directing group migration

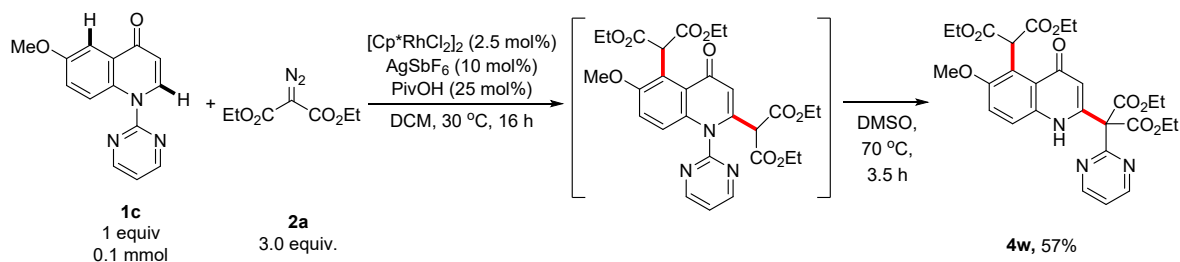

An oven-dried Schlenk tube was evacuated and flushed with argon three times. Then, it was evacuated and transferred to the glovebox. AgSbF<sub>6</sub> (3.5 mg, 0.01 mmol), [Cp\*RhCl<sub>2</sub>]<sub>2</sub> (1.6 mg, 0.0025 mmol) were added, and the Schlenk tube was transferred to the fume hood. 1-(2-Pyrimidinyl)-4(1H)-quinolinone **1c** (0.2 mmol), diethyl 2-diazomalonate **2a** (0.24 mmol), PivOH (2.6mg, 0.025 mmol) and DCM (1.0 mL) were added under Ar. The reaction mixture was stirred at 30 °C for 16 h. And then, The reaction solvents evaporated and DMSO (1.0 mL) added. The reaction mixture was stirred at 70 °C for 3.5 h. The reaction was quenched with saturated NaHCO<sub>3</sub> solution, and the mixture was extracted three times with ethyl acetate. The combined organic layers were washed with brine, dried with anhydrous MgSO<sub>4</sub>, and the solvents evaporated to dryness. The crude product was purified by column chromatography on silica gel using Acetone:DCM = 1:5 as the eluent.

### 4.5.3 Procedure for the synthesis of **6** via acid-catalyzed lactonization

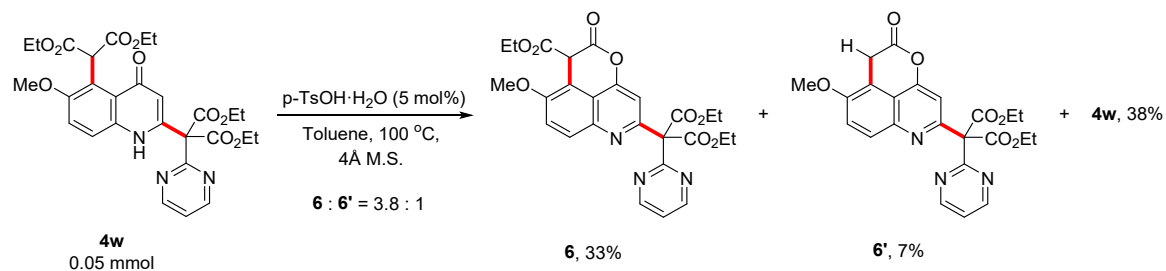

An oven-dried Schlenk tube was evacuated and flushed with argon three times. Then, **4w** (28.5 mg, 0.05 mmol), p-TsOH·H<sub>2</sub>O (1.0 mg, 0.0025 mmol), 4 Å M.S. and toluene (0.38 mL) were added under Ar. The reaction mixture was stirred at 100 °C for 16 h. Afterward, The crude product was purified by flash column chromatography on silica gel, mixture of **6** in 40% yield as yellow oil. Purification by silica gel chromatography (Acetone:DCM = 1:5, **6** + **6'**  $R_f$  = 0.6); <sup>1</sup>H NMR (500 MHz, CDCl<sub>3</sub>, major product **6**) δ 8.74 (d,  $J$  = 4.9 Hz, 2H), 8.05 (dd,  $J$  = 9.3, 0.8 Hz, 1H), 7.48 – 7.38 (m, 2H), 7.23 (t,  $J$  = 4.9 Hz, 1H), 5.18 (s, 1H), 4.48 – 4.35 (m, 5H), 4.27 – 4.16 (m, 2H), 3.97 (s, 4H), 1.32 (td,  $J$  = 7.1, 1.6 Hz, 7H), 1.22 (d,  $J$  = 7.1 Hz, 3H); HRMS (EI-MS)  $m/z$  calcd for C<sub>26</sub>H<sub>25</sub>N<sub>3</sub>O<sub>9</sub> [M]<sup>+</sup> 523.1591, found 523.1592; minor product **6'**: HRMS (FAB)  $m/z$  calcd for C<sub>23</sub>H<sub>22</sub>N<sub>3</sub>O<sub>7</sub> [M + H]<sup>+</sup> 452.1458, found 452.1582.



## 5. Mechanistic Study

### 5.1 Deuterium-labeling experiment

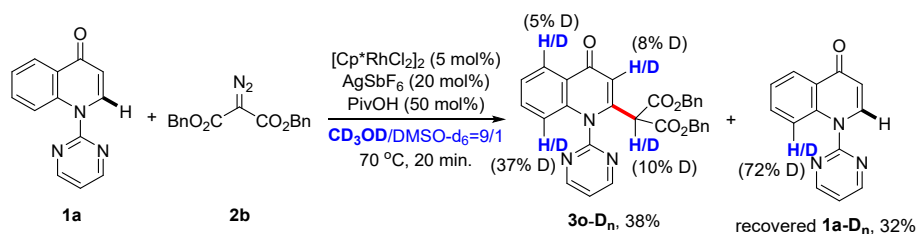

An oven-dried Schlenk tube was evacuated and flushed with argon three times. Then, it was evacuated and transferred to the glovebox.  $\text{AgSbF}_6$  (6.9 mg, 0.02 mmol),  $[\text{Cp}^*\text{RhCl}_2]_2$  (3.1 mg, 0.005 mmol) were added, and the Schlenk tube was transferred to the fume hood. 1-(2-Pyrimidinyl)-4(1*H*)-quinolinone **1a** (0.1 mmol), dimethyl 2-diazomalonate **2b** (0.16 mmol),  $\text{PivOH}$  (5.1mg, 0.05 mmol),  $\text{CD}_3\text{OD}$  (0.9 mL) and  $\text{DMSO-d}_6$  (0.1 mL) were added under Ar. The reaction mixture was stirred at 70 °C for 20 min. The reaction was quenched with saturated  $\text{NaHCO}_3$  solution, and the mixture was extracted three times with ethyl acetate. The combined organic layers were washed with brine, dried with anhydrous  $\text{MgSO}_4$ , and the solvents evaporated to dryness. The crude product was purified by column chromatography on silica gel using Acetone:DCM = 1:5 as the eluent. Due to the shortened reaction time, the alkylation product was predominantly obtained, with the migration product yielding less than 10%. The D-incorporation of **3o-D<sub>n</sub>** were estimated by  $^1\text{H}$  NMR analysis as shown in Figure S3.

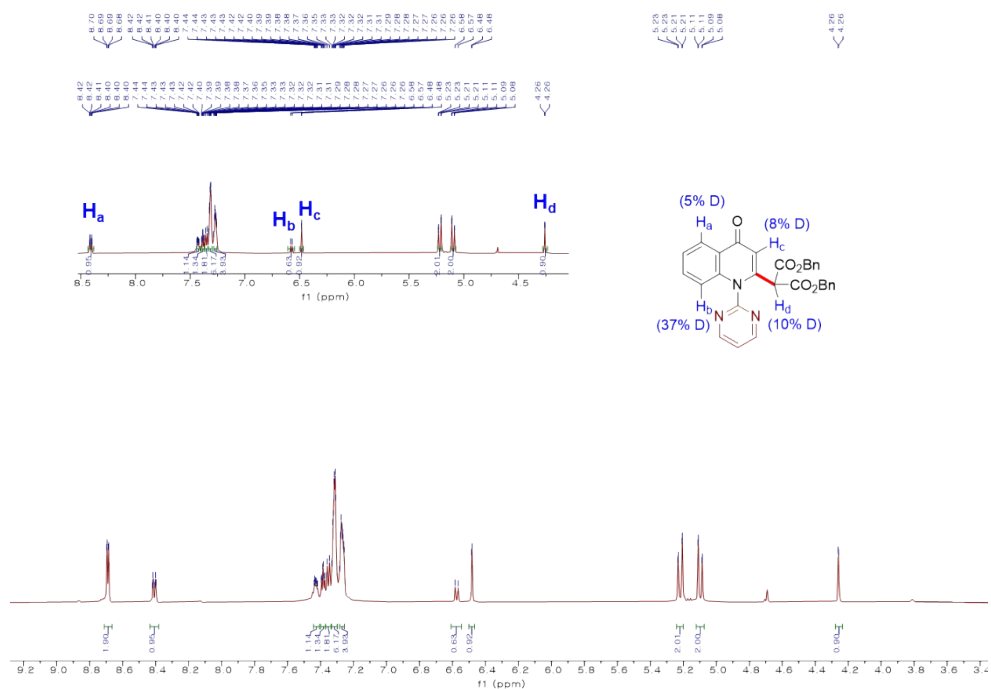

**Figure S3.**  $^1\text{H}$  NMR in Chloroform-*d* spectrum of the reaction of **1a** and **2b** in  $\text{CD}_3\text{OD}/\text{DMSO}-d_6$  (300 MHz)

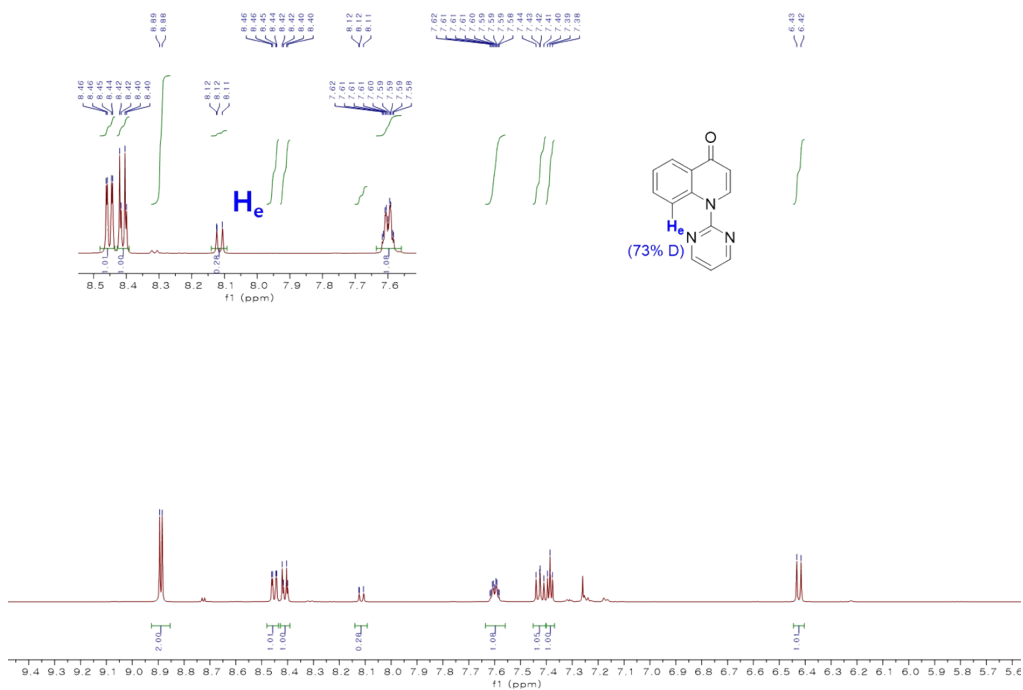

**Figure S3.**  $^1\text{H}$  NMR in Chloroform-*d* spectrum of the recovered **1a** in  $\text{CD}_3\text{OD}/\text{DMSO}-d_6$  (300 MHz)

## 5.2 Heteroarene migration test using C2-alkylated compound 3a

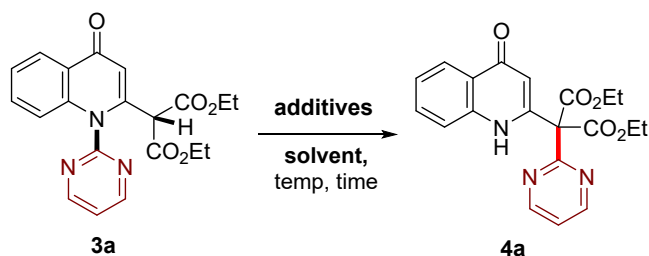

**Table S2. Heteroarene migration test using C2-alkylated product 3a**

| Entry | Additives                      | Solvent                  | Temp (°C) | Time (h) | Yield (%)<br>4a |
|-------|--------------------------------|--------------------------|-----------|----------|-----------------|
| 1     | NaOtBu<br>(1 equiv.)           | DMSO                     | 70        | 4        | 76              |
| 2     | NaOMe<br>(1 equiv.)            | DMSO                     | 70        | 4        | 49              |
| 3     | HCl<br>(1 equiv.)              | DMSO                     | 70        | 4        | 65              |
| 4     | PivOH<br>(50 mol%)             | DMSO                     | 70        | 1        | 56              |
| 5     | H <sub>2</sub> O<br>(1 equiv.) | DMSO                     | 70        | 5        | 68              |
| 6     | -                              | DMSO                     | 70        | 4        | 90              |
| 7     | -                              | DMSO                     | 30        | 48       | 39              |
| 8     | -                              | EtOH/DMSO<br>(v/v = 9/1) | 70        | 4        | 65              |
| 9     | -                              | EtOH                     | 70        | 4        | 60              |
| 10    | -                              | MeCN                     | 70        | 4        | 10              |
| 11    | -                              | DCE                      | 70        | 4        | 2               |

### Procedure for the experimental entries 1–5 of Table S2

An oven-dried Schlenk tube was evacuated and flushed with argon three times. Then, diethyl 2-(4-oxo-1-(pyrimidin-2-yl)-1,4-dihydroquinolin-2-yl)malonate **3a** (0.1 mmol), the corresponding base or acid (1 equiv.) and DMSO (1 mL) were added un<sub>er</sub> Ar. The reaction

mixture was stirred at 70 °C. The reaction was quenched with saturated NaHCO<sub>3</sub> solution, and the mixture was extracted three times with ethyl acetate. The combined organic layers were washed with brine, dried with anhydrous MgSO<sub>4</sub>, and the solvents evaporated to dryness. The crude product was purified by flash column chromatography on silica gel.

**Procedure for the experimental entries 6–11 of Table S2**

An oven-dried Schlenk tube was evacuated and flushed with argon three times. Then, diethyl 2-(4-oxo-1-(pyrimidin-2-yl)-1,4-dihydroquinolin-2-yl) malonate **3a** (0.1 mmol) and the corresponding solvent (1 mL) were added under Ar. The reaction mixture was stirred at corresponding temperature. The reaction was quenched with saturated NaHCO<sub>3</sub> solution, and the mixture was extracted three times with ethyl acetate. The combined organic layers were washed with brine, dried with anhydrous MgSO<sub>4</sub>, and the solvents evaporated to dryness. The crude product was purified by flash column chromatography on silica gel.

### 5.3 Radical trapping experiments

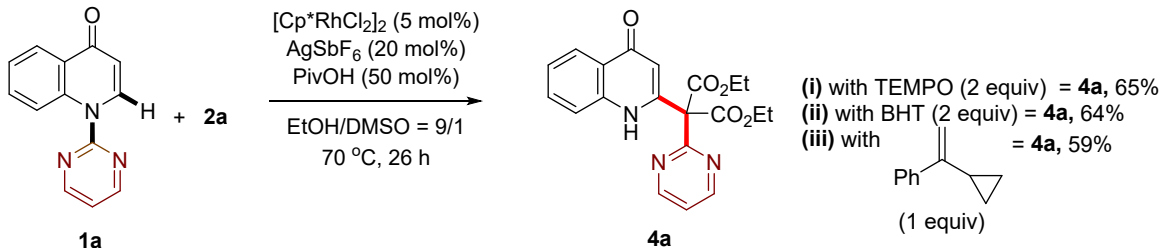

#### Procedure for the experiments (i)–(ii)

An oven-dried Schlenk tube was evacuated and flushed with argon three times. Then, it was evacuated and transferred to the glovebox.  $\text{AgSbF}_6$  (13.7 mg, 0.04 mmol),  $[\text{Cp}^*\text{RhCl}_2]_2$  (6.2 mg, 0.01 mmol) were added, and the Schlenk tube was transferred to the fume hood. 1-(2-Pyrimidinyl)-4(1*H*)-quinolinone **1** (0.2 mmol), diethyl 2-diazomalonate **2** (0.32 mmol), PivOH (10.2mg, 0.1 mmol), TEMPO or BHT (2 equiv.), EtOH (1.8 mL) and DMSO (0.2 mL) were added under Ar. The reaction mixture was stirred at 70 °C for 24 h. The reaction was quenched with saturated  $\text{NaHCO}_3$  solution, and the mixture was extracted three times with ethyl acetate. The combined organic layers were washed with brine, dried with anhydrous  $\text{MgSO}_4$ , and the solvents evaporated to dryness. The crude product was purified by flash column chromatography on silica gel, affording the product **4a** as a white solid.



### Procedure for the experiment (iii)

An oven-dried Schlenk tube was evacuated and flushed with argon three times. Then, it was evacuated and transferred to the glovebox. AgSbF<sub>6</sub> (13.7 mg, 0.04 mmol), [Cp\*RhCl<sub>2</sub>]<sub>2</sub> (6.2 mg, 0.01 mmol) were added, and the Schlenk tube was transferred to the fume hood. 1-(2-Pyrimidinyl)-4(1*H*)-quinolinone **1** (0.2 mmol), diethyl 2-diazomalonate **2** (0.32 mmol), PivOH (10.2mg, 0.1 mmol), (1-cyclopropylvinyl)benzene (1 equiv.), EtOH (1.8 mL) and DMSO (0.2 mL) were added under Ar. The reaction mixture was stirred at 70 °C for 24 h. The reaction was quenched with saturated NaHCO<sub>3</sub> solution, and the mixture was extracted three times with ethyl acetate. The combined organic layers were washed with brine, dried with anhydrous MgSO<sub>4</sub>, and the solvents evaporated to dryness. The crude product was purified by flash column chromatography on silica gel, affording the product **4a** as a white solid.

#### 5.4 Attempted Cp\*Rh(III) catalysis using N-pyrimidyl indole 6

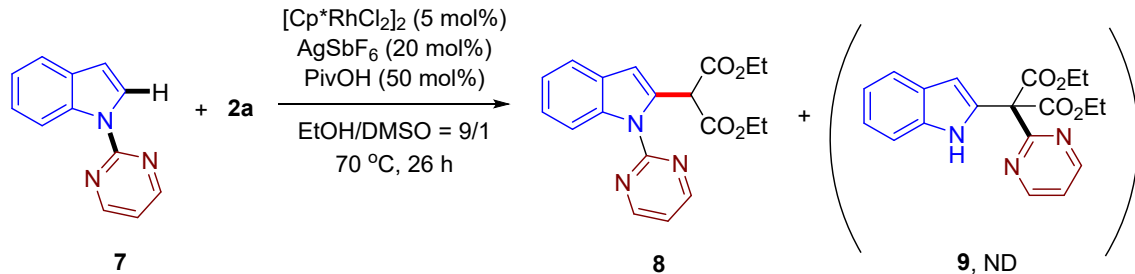

An oven-dried Schlenk tube was evacuated and flushed with argon three times. Then, it was evacuated and transferred to the glovebox. AgSbF<sub>6</sub> (13.7 mg, 0.04 mmol), [Cp\*RhCl<sub>2</sub>]<sub>2</sub> (6.2 mg, 0.01 mmol) were added, and the Schlenk tube was transferred to the fume hood. 1-(pyrimidin-2-yl)-1H-indole **7** (0.2 mmol), diethyl 2-diazomalonate **2a** (0.32 mmol), PivOH (10.2mg, 0.1 mmol), EtOH (1.8 mL) and DMSO (0.2 mL) were added under Ar. The reaction mixture was stirred at 70 °C for 24 h. The reaction was quenched with saturated NaHCO<sub>3</sub> solution, and the mixture was extracted three times with ethyl acetate. The combined organic layers were washed with brine, dried with anhydrous MgSO<sub>4</sub>, and the solvents evaporated to dryness. The crude product was purified by flash column chromatography on silica gel. Alkylated product, diethyl 2-(1-(pyrimidin-2-yl)-1H-indol-2-yl)malonate, **8** was isolated in 31% yield (22 mg), but C-H alkylation/[1,3]-pyrimidine migration product **9** was not detected.

### 5.5 Rearrangement test using alkylated indole compound 7

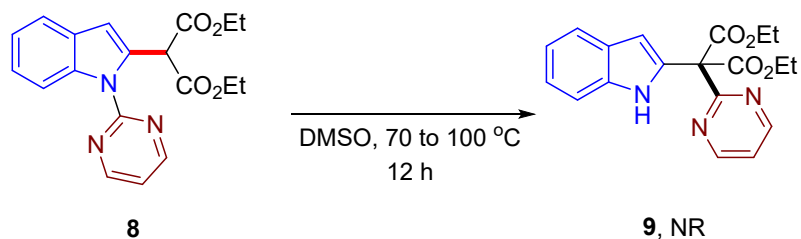

An oven-dried Schlenk tube was evacuated and flushed with argon three times. Then, diethyl 2-(1-(pyrimidin-2-yl)-1*H*-indol-2-yl)malonate **8** (0.1 mmol) and DMSO (1 mL) were added under Ar. The reaction mixture was stirred at 70 °C. After checking TLC after 4 h, the reaction temperature was increased to 100°C and stirred for 12h. The reaction was quenched with saturated NaHCO<sub>3</sub> solution, and the mixture was extracted three times with ethyl acetate. The combined organic layers were washed with brine, dried with anhydrous MgSO<sub>4</sub>, and the solvents evaporated to dryness. The crude mixture was checked by NMR, but the desired product **9** was not obtained.

## 5.6 Cross-over experiments

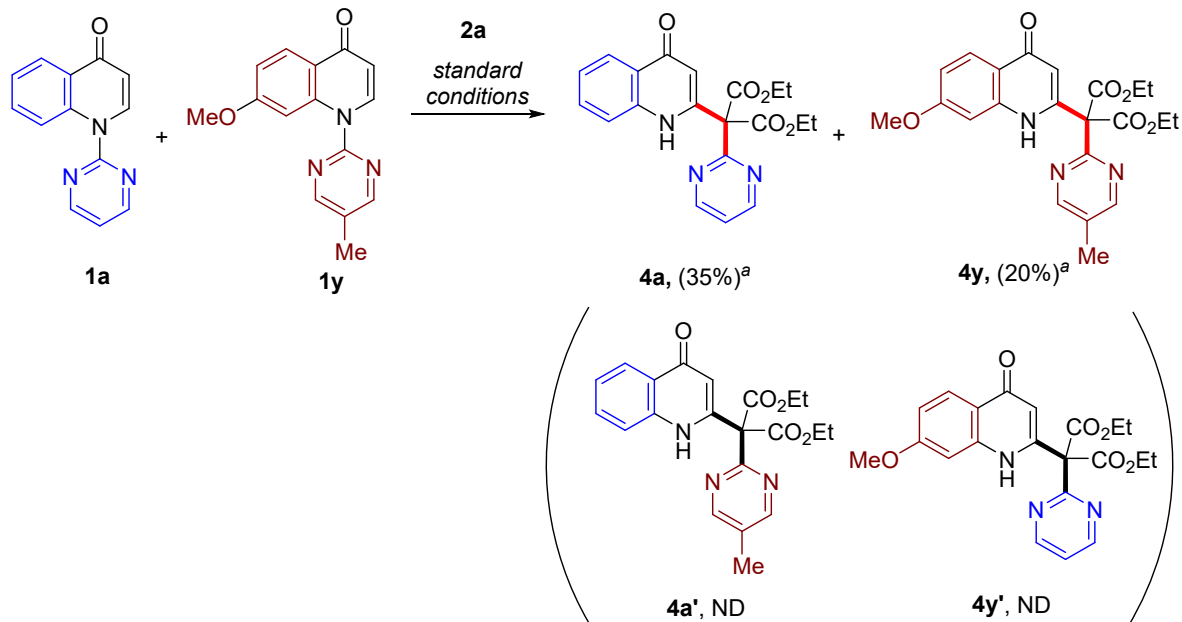

An oven-dried Schlenk tube was evacuated and flushed with argon three times. Then, it was evacuated and transferred to the glovebox.  $\text{AgSbF}_6$  (6.9 mg, 0.02 mmol),  $[\text{Cp}^*\text{RhCl}_2]_2$  (3.1 mg, 0.005 mmol) were added, and the Schlenk tube was transferred to the fume hood. 1-(pyrimidin-2-yl)quinolin-4(1H)-one **1a** (0.1 mmol), 7-methoxy-1-(5-methylpyrimidin-2-yl)quinolin-4(1H)-one **1y** (0.1 mmol), diethyl 2-diazomalonate **2a** (0.32 mmol), PivOH (5.1 mg, 0.05 mmol), EtOH (1.8 mL) and DMSO (0.2 mL) were added under Ar. The reaction mixture was stirred at 70 °C for 24 h. The reaction was quenched with saturated  $\text{NaHCO}_3$  solution, and the mixture was extracted three times with ethyl acetate. The combined organic layers were washed with brine, dried with anhydrous  $\text{MgSO}_4$ , and the solvents evaporated to dryness. Only the intramolecular heteroarene migration products **4a** and **4y** were obtained in 35% and 20% respectively, without forming intermolecularly heteroarene transferred products **4a'** and **4y'**. The yields of **4a** and **4y** were determined by  $^1\text{H}$  NMR analysis using dibromomethane as an internal standard.

### 5.7 Directing group ability test using *N*-phenyl substituted quinolone **9**

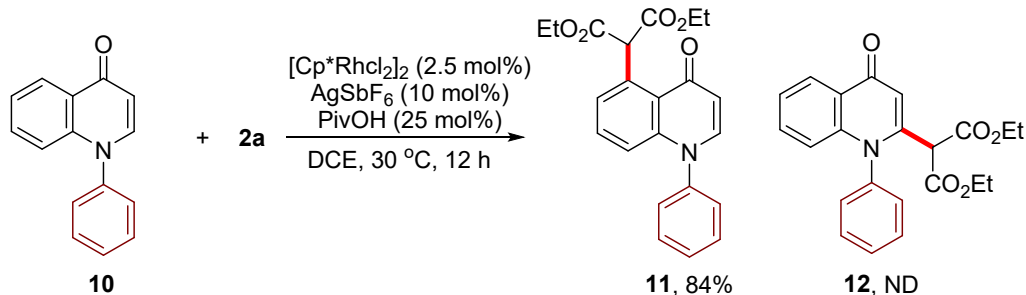

An oven-dried Schlenk tube was evacuated and flushed with argon three times. Then, it was evacuated and transferred to the glovebox.  $\text{AgSbF}_6$  (3.4 mg, 0.01 mmol),  $[\text{Cp}^*\text{RhCl}_2]_2$  (1.5 mg, 0.0025 mmol) were added, and the Schlenk tube was transferred to the fume hood. 1-phenylquinolin-4(1*H*)-one **9** (0.1 mmol), diethyl 2-diazomalonate **2a** (0.12 mmol),  $\text{PivOH}$  (2.6 mg, 0.025 mmol) and dichloroethane (DCE) (1.0 mL) were added under Ar. The reaction mixture was stirred at 30 °C for 12 h. The reaction was quenched with saturated  $\text{NaHCO}_3$  solution, and the mixture was extracted three times with DCM. The combined organic layers were washed with brine, dried with anhydrous  $\text{MgSO}_4$ , and the solvents evaporated to dryness. The crude product was purified by flash column chromatography on silica gel, affording the product **11** (84%, 31.9 mg) as a slightly yellow solid. Eluent for silica gel chromatography (Acetone:DCM= 1:5,  $R_f$ = 0.48);  $^1\text{H NMR}$  (300 MHz, Chloroform-*d*)  $\delta$  7.6 – 7.5 (m, 3H), 7.5 (d,  $J$  = 7.7 Hz, 1H), 7.4 (dd,  $J$  = 8.7, 7.5 Hz, 1H), 7.4 – 7.3 (m, 2H), 7.2 (dd,  $J$  = 7.5, 1.1 Hz, 1H), 6.9 (dd,  $J$  = 8.7, 1.1 Hz, 1H), 6.6 (s, 1H), 6.3 (d,  $J$  = 7.7 Hz, 1H), 4.3 (qd,  $J$  = 7.1, 1.6 Hz, 4H), 1.3 (t,  $J$  = 7.1 Hz, 6H);  $^{13}\text{C NMR}$  (75 MHz, Chloroform-*d*)  $\delta$  179.9, 169.4, 143.1, 141.8, 141.7, 135.0, 131.1, 130.5, 129.7, 127.7, 125.0, 124.2, 118.1, 111.9, 77.6, 77.2, 76.7, 61.5, 56.1, 14.2; **HRMS** (EI-MS)  $m/z$  calcd for  $\text{C}_{22}\text{H}_{21}\text{NO}_5$   $[\text{M}]^+$  379.1420, found 379.1420.

## 5.8 NMR experiments

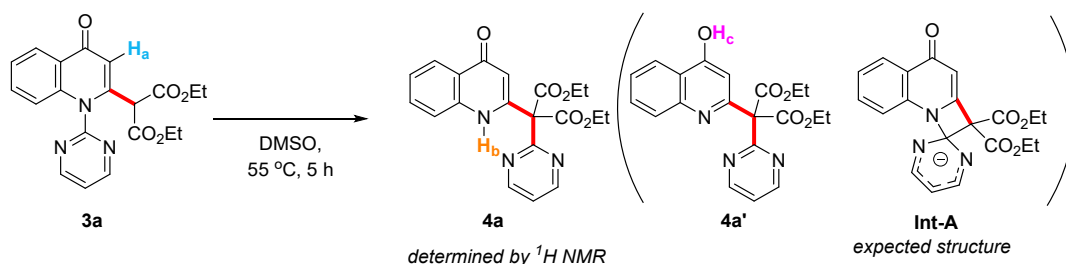

To find out the Int-A, the migration reaction of **3a** and DMSO- $d_6$  was conducted and analyzed by  $^1\text{H NMR}$ . To NMR tube, **3a** (0.05 mmol, 1 equiv) were dissolved in DMSO- $d_6$ . The  $^1\text{H NMR}$  were measured immediately, every 30 min. at 55  $^\circ\text{C}$ . The results are shown in Figure S4. However, in  $^1\text{H NMR}$  spectra, we couldn't detect any reaction intermediates in time-dependent NMR experiments.

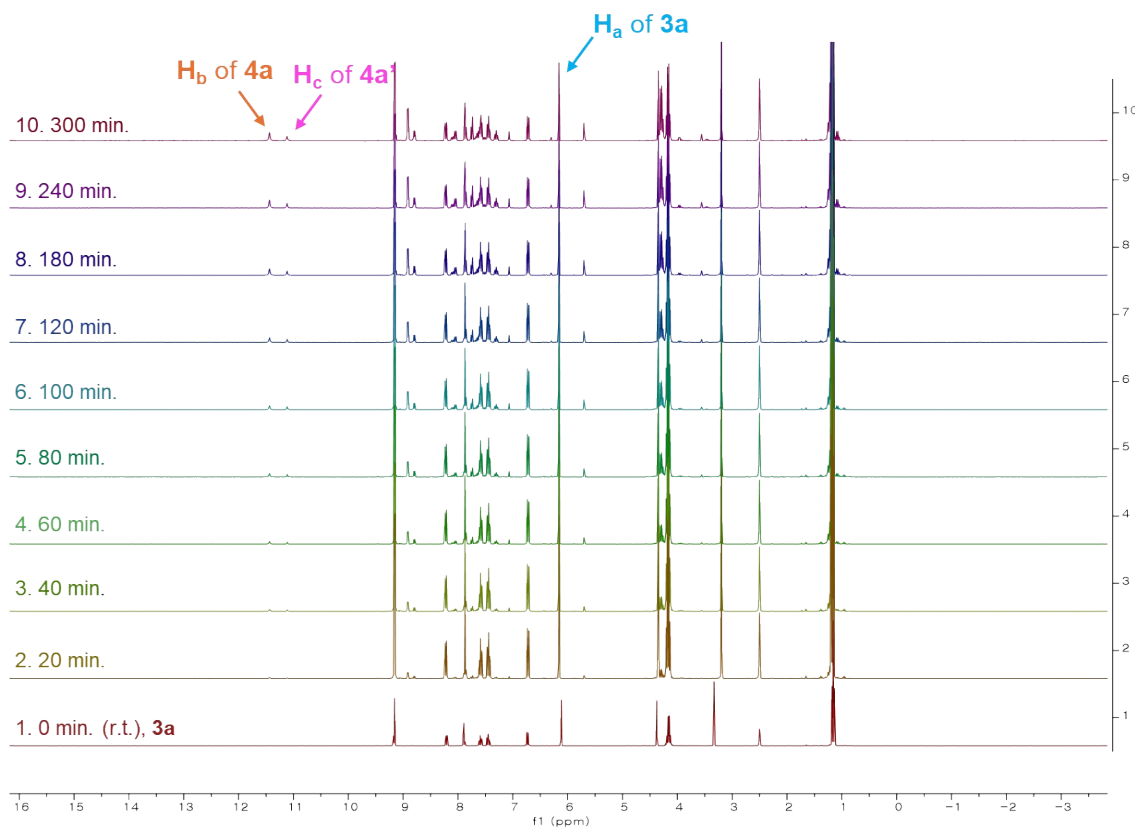

**Figure S4.**  $^1\text{H NMR}$  spectra of migration reaction of **3a** in DMSO- $d_6$ .

## 6. Characterization Data of All Compounds

### Characterization of products 3

#### Diethyl 2-(4-oxo-1-(pyrimidin-2-yl)-1,4-dihydroquinolin-2-yl)malonate (3a):

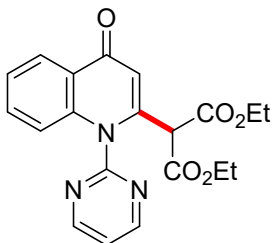

White solid (60.3 mg, yield: 79%); mp 131–133 °C; purification by silica gel chromatography (Acetone:DCM= 1:5,  $R_f$ = 0.38);  $^1\text{H NMR}$  (300 MHz, Chloroform-*d*)  $\delta$  9.00 (d,  $J$  = 4.9 Hz, 2H), 8.42 (dd,  $J$  = 7.9, 1.7 Hz, 1H), 7.58 (t,  $J$  = 4.9 Hz, 1H), 7.45 (ddd,  $J$  = 8.7, 7.1, 1.8 Hz, 1H), 7.35 (ddd,  $J$  = 8.0, 7.1, 1.1 Hz, 1H), 6.62 – 6.55 (m, 1H), 6.46 (s, 1H), 4.28 – 4.13 (m, 5H), 1.23 (t,  $J$  = 7.1 Hz, 6H);  $^{13}\text{C NMR}$  (75 MHz, Chloroform-*d*)  $\delta$  178.3, 165.3, 160.4, 158.3, 144.0, 141.4, 132.3, 126.4, 125.6, 124.4, 121.9, 117.1, 112.6, 62.8, 56.5, 14.0; **HRMS** (EI-MS)  $m/z$  calcd for  $\text{C}_{20}\text{H}_{19}\text{N}_3\text{O}_5$   $[\text{M}]^+$  381.1325, found 381.1327.

#### Diethyl 2-(6-methyl-4-oxo-1-(pyrimidin-2-yl)-1,4-dihydroquinolin-2-yl)malonate (3b):

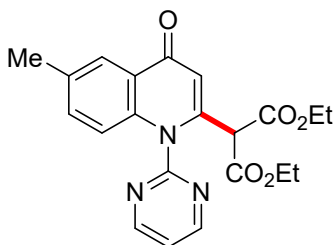

Slightly yellow solid (69.6 mg, yield: 88%); mp 127–129 °C; purification by silica gel chromatography (Acetone:DCM= 1:10,  $R_f$  = 0.25);  $^1\text{H NMR}$  (300 MHz, Chloroform-*d*)  $\delta$  8.97 (d,  $J$  = 4.9 Hz, 2H), 8.21 – 8.13 (m, 1H), 7.58 (t,  $J$  = 4.9 Hz, 1H), 7.29 – 7.23 (m, 1H), 6.50 (d,  $J$  = 8.7 Hz, 1H), 6.45 (s, 1H), 4.22 – 4.11 (m, 5H), 2.38 (s, 3H), 1.19 (t,  $J$  = 7.1 Hz, 6H);  $^{13}\text{C NMR}$  (75 MHz, Chloroform-*d*)  $\delta$  178.1, 165.3, 160.2, 158.1, 143.7, 139.4, 134.4, 133.7, 125.5, 125.3, 121.9, 117.0, 112.0, 62.7, 56.3, 20.8, 13.9; **HRMS** (EI-MS)  $m/z$  calcd for  $\text{C}_{21}\text{H}_{21}\text{N}_3\text{O}_5$   $[\text{M}]^+$  395.1481, found 395.1485.

#### Diethyl 2-(6-methoxy-4-oxo-1-(pyrimidin-2-yl)-1,4-dihydroquinolin-2-yl)malonate (3c):

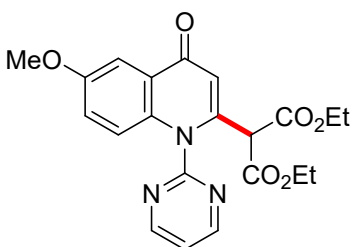

White solid (58.4 mg, yield: 71%); mp 155–157 °C;

purification by silica gel chromatography (Acetone:DCM= 1:5,  $R_f$  = 0.38);  $^1\text{H NMR}$  (300 MHz, Chloroform-*d*)  $\delta$  8.99 (d,  $J$  = 4.9 Hz, 2H), 7.81 (d,  $J$  = 3.1 Hz, 1H), 7.56 (t,  $J$  = 4.9 Hz, 1H), 7.07 (dd,  $J$  = 9.3, 3.1 Hz, 1H), 6.57 (d,  $J$  = 9.3 Hz, 1H), 6.45 (s, 1H), 4.21 (ddp,  $J$  = 10.3, 7.1, 3.5 Hz, 5H), 3.90 (s, 3H), 1.23 (t,  $J$  = 7.1 Hz, 6H);  $^{13}\text{C NMR}$  (75 MHz, Chloroform-*d*)  $\delta$  177.8, 165.4, 160.3, 158.3, 156.8, 143.2, 136.0, 126.9, 123.0, 121.8, 118.9, 111.6, 105.3, 62.8, 56.4, 55.9, 14.0; **HRMS** (EI-MS)  $m/z$  calcd for  $\text{C}_{21}\text{H}_{21}\text{N}_3\text{O}_6$   $[\text{M}]^+$  411.1430, found 411.1430.

**Diethyl 2-(6-chloro-4-oxo-1-(pyrimidin-2-yl)-1,4-dihydroquinolin-2-yl)malonate (3d):**

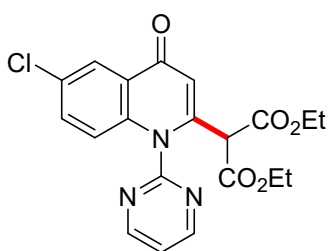

Slightly yellow solid (54.9 mg, yield: 66%); mp 110–112 °C; purification by silica gel chromatography (Acetone:DCM= 1:10,  $R_f$  = 0.38);  $^1\text{H NMR}$  (300 MHz, Chloroform-*d*)  $\delta$  8.98 (dd,  $J$  = 5.0, 1.0 Hz, 2H), 8.33 (d,  $J$  = 2.6 Hz, 1H), 7.60 (td,  $J$  = 4.9, 1.0 Hz, 1H), 7.40 – 7.31 (m, 1H), 6.56 (d,  $J$  = 9.1 Hz, 1H), 6.42 (d,  $J$  = 0.9 Hz, 1H), 4.22 – 4.11 (m, 5H), 1.19 (td,  $J$  = 7.1, 1.0 Hz, 6H);  $^{13}\text{C NMR}$  (75 MHz, Chloroform-*d*)  $\delta$  176.8, 165.0, 160.4, 157.7, 144.4, 139.7, 132.4, 130.6, 126.5, 125.5, 122.1, 119.0, 112.5, 62.8, 56.1, 13.9; **HRMS** (EI-MS)  $m/z$  calcd for  $\text{C}_{20}\text{H}_{18}\text{ClN}_3\text{O}_5$   $[\text{M}]^+$  415.0935, found 415.0937.



**Diethyl 2-(4-oxo-1-(pyrimidin-2-yl)-6-(trifluoromethyl)-1,4-dihydroquinolin-2-yl)malonate (3e):**

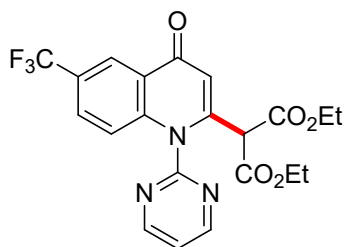

Slightly yellow sticky solid (83.6 mg, yield: 93%); purification by silica gel chromatography (Acetone:DCM= 1:10,  $R_f$  = 0.5);  $^1\text{H NMR}$  (300 MHz, Chloroform-*d*)  $\delta$  9.02 (d,  $J$  = 4.9 Hz, 2H), 8.71 (d,  $J$  = 2.2 Hz, 1H), 7.67 – 7.60 (m, 2H), 6.72 (d,  $J$  = 9.0 Hz, 1H), 6.51 (s, 1H), 4.27 – 4.13 (m, 5H), 1.23 (t,  $J$  = 7.1 Hz, 6H);  $^{13}\text{C NMR}$  (75 MHz, Chloroform-*d*)  $\delta$  177.4, 165.0, 160.6, 157.9, 144.9, 143.1, 128.4 (q,  $J$  = 3.4 Hz), 126.6 (q,  $J$  = 33.5 Hz), 125.2, 124.5 (q,  $J$  = 4.2 Hz), 123.8 (q,  $J$  = 270.8 Hz), 122.3, 118.2, 113.5, 77.6, 77.2, 76.7, 63.0, 56.4, 14.0;  $^{19}\text{F NMR}$  (471 MHz, Chloroform-*d*)  $\delta$  -62.3; **HRMS** (EI-MS)  $m/z$  calcd for  $\text{C}_{21}\text{H}_{18}\text{F}_3\text{N}_3\text{O}_5$   $[\text{M}]^+$  449.1199, found 449.1201.

**Diethyl 2-(6-nitro-4-oxo-1-(pyrimidin-2-yl)-1,4-dihydroquinolin-2-yl)malonate (3f):**

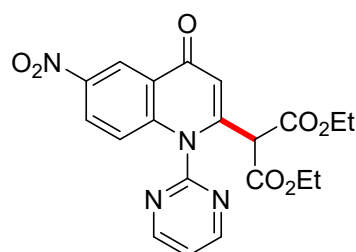

Slightly yellow solid (51.2 mg, yield: 60%); mp 127–130 °C; purification by silica gel chromatography (Acetone:DCM= 1:10,  $R_f$  = 0.45);  $^1\text{H NMR}$  (300 MHz, Chloroform-*d*)  $\delta$  9.25 (d,  $J$  = 2.7 Hz, 1H), 9.05 (d,  $J$  = 4.9 Hz, 2H), 8.23 (dd,  $J$  = 9.4, 2.7 Hz, 1H), 7.68 (t,  $J$  = 4.9 Hz, 1H), 6.73 (d,  $J$  = 9.4 Hz, 1H), 6.52 (s, 1H), 4.27 – 4.16 (m, 5H), 1.24 (t,  $J$  = 7.1 Hz, 6H);  $^{13}\text{C NMR}$  (75 MHz, Chloroform-*d*)  $\delta$  177.0, 164.9, 160.7, 157.6, 145.3, 144.6, 144.0, 126.3, 125.4, 123.2, 122.5, 118.7, 113.9, 63.1, 56.3, 14.0; **HRMS** (EI-MS)  $m/z$  calcd for  $\text{C}_{20}\text{H}_{18}\text{N}_4\text{O}_7$   $[\text{M}]^+$  426.1175, found 426.1173.

**Diethyl 2-(7-methoxy-4-oxo-1-(pyrimidin-2-yl)-1,4-dihydroquinolin-2-yl)malonate (3g):**

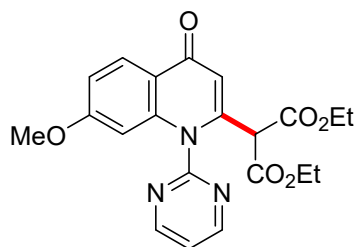

Slightly yellow solid (66.0 mg, yield: 68%); mp 93–95 °C; purification by silica gel

chromatography (Acetone:DCM= 1:5,  $R_f$ = 0.38);  $^1\text{H NMR}$  (300 MHz, Chloroform-*d*)  $\delta$  8.95 (dd,  $J$  = 4.9, 1.0 Hz, 2H), 8.28 (d,  $J$  = 9.0 Hz, 1H), 7.56 (td,  $J$  = 4.9, 1.1 Hz, 1H), 6.89 (dt,  $J$  = 9.0, 1.6 Hz, 1H), 6.34 (d,  $J$  = 1.0 Hz, 1H), 5.92 (d,  $J$  = 2.2 Hz, 1H), 4.14 (ddd,  $J$  = 15.1, 7.5, 1.4 Hz, 5H), 3.62 (d,  $J$  = 1.0 Hz, 3H), 1.17 (td,  $J$  = 7.1, 1.0 Hz, 6H);  $^{13}\text{C NMR}$  (75 MHz, Chloroform-*d*)  $\delta$  177.5, 165.2, 162.7, 160.3, 158.0, 143.8, 142.9, 128.2, 121.9, 119.8, 112.5, 112.2, 100.4, 62.6, 56.2, 55.4, 13.9; **HRMS** (EI-MS)  $m/z$  calcd for  $\text{C}_{21}\text{H}_{21}\text{N}_3\text{O}_6$   $[\text{M}]^+$  411.1430, found 411.1428.

**Diethyl 2-(7-bromo-4-oxo-1-(pyrimidin-2-yl)-1,4-dihydroquinolin-2-yl)malonate (3h):**

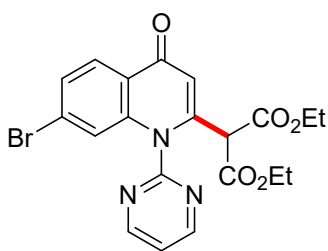

White solid (62.6 mg, yield: 68%); mp 169–171 °C; purification

by silica gel chromatography (Acetone:DCM= 1:10,  $R_f$  = 0.38);

$^1\text{H NMR}$  (300 MHz, Chloroform-*d*)  $\delta$  8.99 (d,  $J$  = 4.9 Hz, 2H),

8.24 (d,  $J$  = 8.6 Hz, 1H), 7.60 (t,  $J$  = 4.9 Hz, 1H), 7.42 (dd,  $J$  =

8.6, 1.7 Hz, 1H), 6.75 (d,  $J$  = 1.6 Hz, 1H), 6.42 (s, 1H), 4.22 – 4.10 (m, 5H), 1.20 (t,  $J$  = 7.1

Hz, 6H);  $^{13}\text{C NMR}$  (75 MHz, Chloroform-*d*)  $\delta$  177.5, 165.0, 160.5, 157.6, 144.4, 141.9,

128.0, 127.9, 127.1, 124.3, 122.2, 119.8, 113.0, 62.8, 56.3, 13.9; **HRMS** (EI-MS)  $m/z$  calcd

for  $\text{C}_{20}\text{H}_{18}\text{BrN}_3\text{O}_5$   $[\text{M}]^+$  459.0430, found 459.0432.

**Diethyl 2-(8-fluoro-4-oxo-1-(pyrimidin-2-yl)-1,4-**

**dihydroquinolin-2-yl)malonate (3i):** White solid (59.1 mg, yield:

74%); mp 97–99 °C; purification by silica gel chromatography

(Acetone:DCM= 1:10,  $R_f$  = 0.55);  $^1\text{H NMR}$  (300 MHz, Chloroform-

*d*)  $\delta$  9.19 (s, 1H), 8.50 (d,  $J$  = 4.8 Hz, 2H), 7.63 – 7.52 (m, 1H), 7.46

– 7.34 (m, 2H), 7.10 (t,  $J$  = 4.8 Hz, 1H), 5.04 (s, 1H), 4.15 (qd,  $J$  = 7.1, 3.2 Hz, 4H), 1.18 (t,

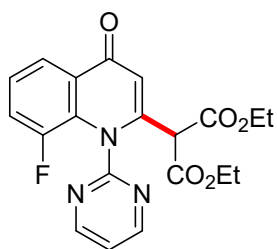

$J = 7.1$  Hz, 6H);  $^{13}\text{C}$  NMR (75 MHz, Chloroform-*d*) 166.8, 164.7, 160.2, 158.3 (d,  $J = 257.5$  Hz), 154.0, 154.0, 152.8, 139.7 (d,  $J = 12.6$  Hz), 127.3, 127.2 (d,  $J = 8.2$  Hz), 124.6, 124.6, 119.8, 118.0 (d,  $J = 5.0$  Hz), 117.9, 117.4, 114.4 (d,  $J = 18.8$  Hz), 77.6, 77.2, 76.7, 62.4, 50.2, 14.0;  $^{19}\text{F}$  NMR (471 MHz, Chloroform-*d*)  $\delta$  -124.1; HRMS (EI-MS)  $m/z$  calcd for  $\text{C}_{20}\text{H}_{18}\text{FN}_3\text{O}_5$   $[\text{M}]^+$  399.1230, found 399.1232.

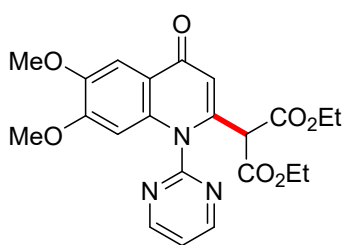

**Diethyl 2-(6,7-dimethoxy-4-oxo-1-(pyrimidin-2-yl)-1,4-**

**dihydroquinolin-2-yl)malonate (3j):** Slightly yellow solid

(35.3 mg, yield: 40%); mp 65–67 °C; purification by silica gel chromatography (Acetone:DCM= 1:5,  $R_f = 0.25$ );  $^1\text{H}$  NMR (300 MHz, Chloroform-*d*)  $\delta$  9.01 (d,  $J = 4.8$  Hz, 2H), 7.76 (s, 1H), 7.60 (t,  $J = 4.8$  Hz, 1H), 6.48 (s, 1H), 6.01 (s, 1H), 4.18 (dtd,  $J = 13.3, 6.6, 3.7$  Hz, 5H), 3.96 (s, 3H), 3.64 (s, 3H), 1.22 (t,  $J = 7.1$  Hz, 6H);  $^{13}\text{C}$  NMR (75 MHz, Chloroform-*d*)  $\delta$  176.8, 165.4, 160.3, 158.3, 153.5, 147.7, 143.0, 137.0, 122.0, 119.9, 111.9, 105.4, 98.8, 62.8, 56.5, 56.4, 56.0, 14.0; HRMS (EI-MS)  $m/z$  calcd for  $\text{C}_{22}\text{H}_{23}\text{N}_3\text{O}_7$   $[\text{M}]^+$  441.1536, found 441.1535.

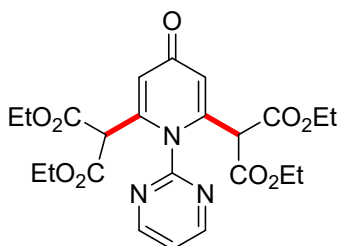

**Tetraethyl 2,2'-(4-oxo-1-(pyrimidin-2-yl)-1,4-**

**dihydropyridine-2,6-diyl)dimalonate (3k):** Slightly yellow

solid (64.6 mg, yield: 66%); mp 129–131 °C; purification by silica gel chromatography (Acetone:DCM= 1:5,  $R_f = 0.18$ );  $^1\text{H}$  NMR (300 MHz, Chloroform-*d*)  $\delta$  8.86 (d,  $J = 4.9$  Hz, 2H), 7.52 (t,  $J = 4.9$  Hz, 1H), 6.50 (s, 2H), 4.15 (dt,  $J = 14.5, 7.3$  Hz, 10H), 1.22 (t,  $J = 7.1$  Hz, 12H);

$^{13}\text{C}$  NMR (75 MHz, Chloroform-*d*)  $\delta$  178.7, 165.2, 159.8, 157.2, 143.6, 122.0, 119.6, 62.8, 56.3, 14.0; HRMS (EI-MS)  $m/z$  calcd for  $\text{C}_{23}\text{H}_{27}\text{N}_3\text{O}_9$   $[\text{M}]^+$  489.1747, found 489.1745.

**Diethyl 2-(6-oxo-1-(pyrimidin-2-yl)-1,6-dihydropyridin-2-yl)malonate (3l):**

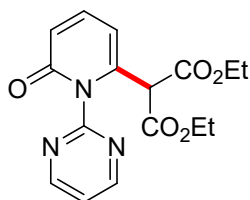

Slightly yellow solid (61.6 mg, yield: 93%); mp 115–117 °C; purification by silica gel chromatography (Acetone:DCM= 1:5,  $R_f$  = 0.20);  $^1\text{H}$  NMR (300 MHz, Chloroform-*d*)  $\delta$  8.87 (d,  $J$  = 4.9 Hz, 2H), 7.48 – 7.33 (m, 2H), 6.61 (dd,  $J$  = 9.3, 1.1 Hz, 1H), 6.32 (dd,  $J$  = 7.0, 1.1 Hz, 1H), 4.14 (q,  $J$  = 7.1 Hz, 4H), 4.03 (s, 1H), 1.19 (t,  $J$  = 7.1 Hz, 6H);  $^{13}\text{C}$  NMR (75 MHz, Chloroform-*d*)  $\delta$  165.3, 163.0, 159.8, 157.9, 139.9, 139.3, 121.4, 121.4, 106.8, 62.6, 55.3, 13.9; HRMS (EI-MS)  $m/z$  calcd for  $\text{C}_{16}\text{H}_{17}\text{N}_3\text{O}_5$   $[\text{M}]^+$  331.1168, found 331.1169.

**Diethyl 2-(1-oxo-2-(pyrimidin-2-yl)-1,2-dihydroisoquinolin-3-yl)malonate (3m):**

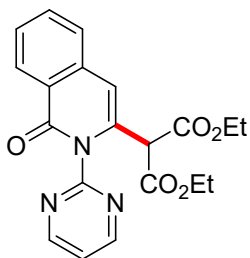

White solid (75.5 mg, yield: 99%); mp 167–169 °C; purification by silica gel chromatography (Acetone:DCM= 1:10,  $R_f$  = 0.28);  $^1\text{H NMR}$  (300 MHz, Chloroform-*d*)  $\delta$  8.92 (d,  $J$  = 4.9 Hz, 2H), 8.42 – 8.34 (m, 1H), 7.68 (ddd,  $J$  = 8.2, 7.1, 1.4 Hz, 1H), 7.58 – 7.41 (m, 3H), 6.69 (s, 1H), 4.26 – 4.15 (m, 5H), 1.24 (t,  $J$  = 7.1 Hz, 6H);  $^{13}\text{C NMR}$  (75 MHz, Chloroform-*d*)  $\delta$  165.9, 163.1, 159.6, 158.4, 136.3, 133.2, 132.9, 128.0, 127.6, 126.6, 125.7, 121.1, 107.6, 77.5, 77.1, 76.7, 62.5, 55.4, 13.9; **HRMS** (EI-MS)  $m/z$  calcd for  $\text{C}_{20}\text{H}_{19}\text{N}_3\text{O}_5$   $[\text{M}]^+$  381.1325, found 381.1327.

**Dimethyl 2-(4-oxo-1-(pyrimidin-2-yl)-1,4-dihydroquinolin-2-yl)malonate (3n):**

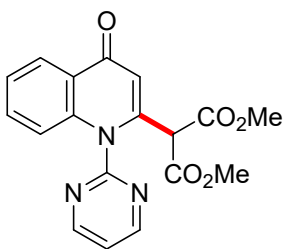

White solid (44.5 mg, yield: 63%); mp 156–158 °C; purification by silica gel chromatography (Acetone:DCM= 1:5,  $R_f$  = 0.30);  $^1\text{H NMR}$  (300 MHz, Chloroform-*d*)  $\delta$  8.99 (d,  $J$  = 4.8 Hz, 2H), 8.39 (dd,  $J$  = 8.0, 1.7 Hz, 1H), 7.58 (t,  $J$  = 4.9 Hz, 1H), 7.44 (ddd,  $J$  = 8.7, 7.1, 1.7 Hz, 1H), 7.33 (ddd,  $J$  = 8.1, 7.1, 1.1 Hz, 1H), 6.63 – 6.53 (m, 1H), 6.41 (s, 1H), 4.22 (s, 1H), 3.72 (s, 6H);  $^{13}\text{C NMR}$  (75 MHz, Chloroform-*d*)  $\delta$  178.2, 165.7, 160.4, 158.1, 143.9, 141.4, 132.5, 126.4, 125.5, 124.6, 122.1, 117.1, 112.4, 56.1, 53.6; **HRMS** (EI-MS)  $m/z$  calcd for  $\text{C}_{18}\text{H}_{15}\text{N}_3\text{O}_5$   $[\text{M}]^+$  353.1012, found 353.1014.

**Dibenzyl 2-(4-oxo-1-(pyrimidin-2-yl)-1,4-dihydroquinolin-2-yl)malonate (3o):**

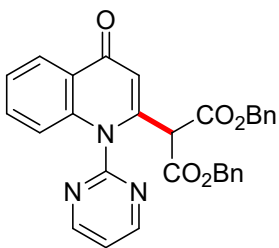

Slightly yellow solid (72.8 mg, yield: 72%); mp 69–72 °C; purification by silica gel chromatography (Acetone:DCM= 1:10,  $R_f$

= 0.38); **<sup>1</sup>H NMR** (500 MHz, Chloroform-*d*) δ 8.68 (d, *J* = 4.9 Hz, 2H), 8.39 (dd, *J* = 8.1, 1.7 Hz, 1H), 7.42 (ddd, *J* = 8.7, 7.0, 1.7 Hz, 1H), 7.38 (t, *J* = 4.9 Hz, 1H), 7.34 – 7.28 (m, 7H), 7.28 – 7.23 (m, 4H), 6.57 (d, *J* = 8.6 Hz, 1H), 6.50 (s, 1H), 5.21 (d, *J* = 12.2 Hz, 2H), 5.09 (d, *J* = 12.2 Hz, 2H), 4.28 (s, 1H); **<sup>13</sup>C NMR** (126 MHz, Chloroform-*d*) δ 178.0, 165.0, 160.1, 157.9, 143.6, 141.3, 134.6, 132.3, 128.6, 128.6, 128.6, 126.2, 125.5, 124.4, 121.7, 117.1, 112.6, 68.3, 56.2; **HRMS** (EI-MS) *m/z* calcd for C<sub>30</sub>H<sub>23</sub>N<sub>3</sub>O<sub>5</sub> [M]<sup>+</sup> 505.1638, found 505.1635.

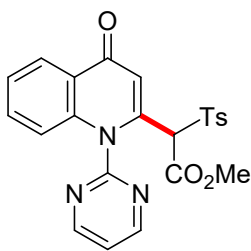

**Methyl (R)-2-(4-oxo-1-(pyrimidin-2-yl)-1,4-dihydroquinolin-2-yl)-2-tosylacetate (3p):** White solid (66.5 mg, yield: 74%); mp 75–77 °C; purification by silica gel chromatography (Acetone:DCM= 1:10, **R<sub>f</sub>** = 0.20); **<sup>1</sup>H NMR** (300 MHz, Chloroform-*d*) δ 8.99 (d, *J* = 4.9 Hz, 2H), 8.33 (dd, *J* = 8.0, 1.7 Hz, 1H), 7.65 – 7.54 (m, 3H), 7.43 (ddd, *J* = 8.7, 7.0, 1.8 Hz, 1H), 7.32 (ddd, *J* = 8.0, 7.0, 1.1 Hz, 1H), 7.26 – 7.21 (m, 2H), 6.67 – 6.59 (m, 1H), 6.53 (s, 1H), 5.16 (s, 1H), 3.74 (s, 3H), 2.38 (s, 3H); **<sup>13</sup>C NMR** (75 MHz, Chloroform-*d*) δ 177.4, 163.2, 160.2, 158.0, 146.5, 141.7, 139.3, 132.4, 132.3, 130.4, 129.6, 126.2, 125.7, 124.7, 121.9, 117.8, 114.3, 69.9, 53.9, 21.8; **HRMS** (EI-MS) *m/z* calcd for C<sub>23</sub>H<sub>19</sub>N<sub>3</sub>O<sub>5</sub>S [M]<sup>+</sup> 449.1045, found 449.1043.

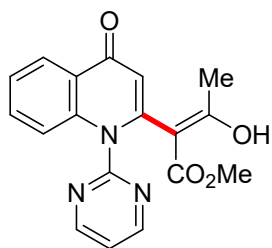

**Methyl (Z)-3-hydroxy-2-(4-oxo-1-(pyrimidin-2-yl)-1,4-dihydroquinolin-2-yl)but-2-enoate (3q):** Slightly yellow solid (29.7 mg, yield: 44%); mp 67–69 °C; purification by silica gel chromatography (Acetone:DCM= 1:5, **R<sub>f</sub>** = 0.28); **<sup>1</sup>H NMR** (300 MHz, Chloroform-*d*) δ 12.68 (s, 1H), 8.90 (d, *J* = 4.9 Hz, 2H), 8.45

(dd,  $J = 8.0, 1.7$  Hz, 1H), 7.51 – 7.42 (m, 2H), 7.36 (t,  $J = 7.5$  Hz, 1H), 6.63 (d,  $J = 8.5$  Hz, 1H), 6.32 (s, 1H), 3.66 (s, 3H), 1.97 (s, 3H);  $^{13}\text{C}$  NMR (75 MHz, Chloroform-*d*)  $\delta$  178.8, 177.4, 171.0, 159.7, 159.0, 145.9, 141.3, 132.2, 126.5, 125.6, 124.2, 121.4, 117.0, 114.7, 99.4, 52.1, 20.4; **HRMS** (EI-MS)  $m/z$  calcd for  $\text{C}_{18}\text{H}_{15}\text{N}_3\text{O}_4$   $[\text{M}]^+$  337.1063, found 337.1063.

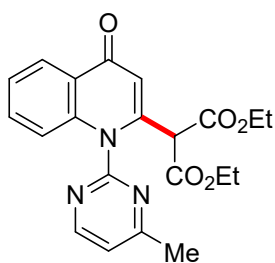

**Diethyl 2-(1-(4-methylpyrimidin-2-yl)-4-oxo-1,4-dihydroquinolin-2-yl)malonate (3s):** Slightly yellow solid (61.7

mg, yield: 78%); mp 103–105 °C; purification by silica gel chromatography (Acetone:DCM= 1:5,  $R_f = 0.40$ );  $^1\text{H}$  NMR (300 MHz, Chloroform-*d*)  $\delta$  8.79 (d,  $J = 5.1$  Hz, 1H), 8.37 (dd,  $J = 8.0, 1.6$

Hz, 1H), 7.46 – 7.38 (m, 2H), 7.31 (ddd,  $J = 8.1, 7.0, 1.0$  Hz, 1H), 6.65 – 6.58 (m, 1H), 6.43 (s, 1H), 4.17 (qd,  $J = 7.1, 1.1$  Hz, 4H), 4.10 (s, 1H), 2.61 (s, 3H), 1.20 (t,  $J = 7.1$  Hz, 6H);  $^{13}\text{C}$  NMR (75 MHz, Chloroform-*d*)  $\delta$  178.1, 171.8, 165.3, 159.6, 157.6, 144.0, 141.2, 132.2, 126.2, 125.5, 124.3, 121.5, 117.1, 112.3, 62.7, 56.5, 24.1, 13.9; **HRMS** (EI-MS)  $m/z$  calcd for  $\text{C}_{21}\text{H}_{21}\text{N}_3\text{O}_5$   $[\text{M}]^+$  395.1481, found 395.1483.

**Diethyl 2-(1-(5-methylpyrimidin-2-yl)-4-oxo-1,4-dihydroquinolin-2-yl)malonate (3t):**

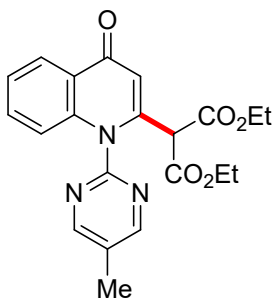

Slightly yellow sticky solid (58.5 mg, yield: 74%); purification by silica gel chromatography (Acetone:DCM= 1:5,  $R_f = 0.43$ );  $^1\text{H}$  NMR (300 MHz, Chloroform-*d*)  $\delta$  8.77 (s, 2H), 8.37 (dd,  $J = 8.0, 1.7$  Hz, 1H), 7.41 (ddd,  $J = 8.7, 7.0, 1.8$  Hz, 1H), 7.31 (ddd,  $J = 8.0, 7.1, 1.1$  Hz, 1H), 6.54 (d,  $J = 8.6$  Hz, 1H), 6.44 (s, 1H), 4.17 (qd,  $J = 7.1, 3.0$

Hz, 5H), 2.46 (s, 3H), 1.20 (t,  $J = 7.1$  Hz, 6H);  $^{13}\text{C}$  NMR (75 MHz, Chloroform-*d*)  $\delta$  178.2,

165.3, 160.2, 155.9, 144.1, 141.4, 132.2, 132.2, 126.2, 125.5, 124.2, 117.1, 112.2, 62.7, 56.3, 15.5, 13.9; **HRMS** (EI-MS)  $m/z$  calcd for  $C_{21}H_{21}N_3O_5$   $[M]^+$  395.1481, found 395.1479.

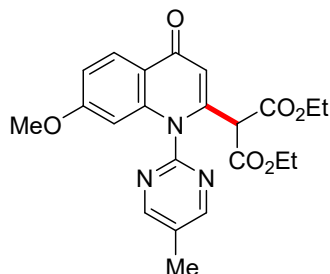

**Diethyl 2-(7-methoxy-1-(5-methylpyrimidin-2-yl)-4-oxo-1,4-**

**dihydroquinolin-2-yl)malonate (3u):** Slightly yellow solid

(61.3 mg, yield: 72%); mp 111–113 °C; purification by silica gel chromatography (Acetone:DCM= 1:5,  $R_f$ = 0.40);  **$^1H$  NMR** (300

MHz, Chloroform-*d*)  $\delta$  8.77 (s, 2H), 8.33 (d,  $J$ = 8.9 Hz, 1H), 6.93

(dd,  $J$ = 9.0, 2.3 Hz, 1H), 6.36 (s, 1H), 5.93 (d,  $J$ = 2.3 Hz, 1H), 4.18 (qq,  $J$ = 6.9, 3.7 Hz,

4H), 4.10 (s, 1H), 3.68 (s, 3H), 2.47 (s, 3H), 1.21 (t,  $J$ = 7.1 Hz, 6H);  **$^{13}C$  NMR** (75 MHz,

Chloroform-*d*)  $\delta$  177.8, 165.4, 162.7, 160.3, 156.0, 144.0, 143.1, 132.1, 128.4, 120.1, 112.3,

112.2, 100.7, 62.7, 56.4, 55.5, 15.6, 14.0; **HRMS** (EI-MS)  $m/z$  calcd for  $C_{22}H_{23}N_3O_6$   $[M]^+$

425.1587, found 425.1590.



**Diethyl 2-(1-(5-bromopyrimidin-2-yl)-4-oxo-1,4-dihydroquinolin-2-yl)malonate (3v):**

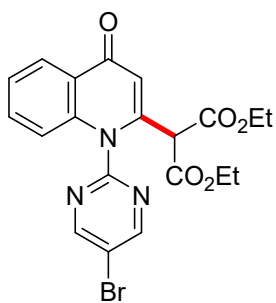

Yellow solid (28.5 mg, yield: 31%); purification by silica gel chromatography (Acetone:DCM= 1:5,  $R_f$  = 0.55); For the major **3u**,  $^1\text{H NMR}$  (300 MHz, Chloroform-*d*)  $\delta$  9.0 (s, 2H), 8.4 (dd,  $J$  = 8.0, 1.7 Hz, 1H), 7.5 (ddd,  $J$  = 8.7, 7.1, 1.8 Hz, 1H), 7.4 (ddd,  $J$  = 8.0, 7.1, 1.1 Hz, 1H), 6.6 (d,  $J$  = 8.5 Hz, 1H), 6.5 (s, 1H), 4.3 – 4.1 (m, 5H),

1.3 (dt,  $J$  = 12.9, 7.1 Hz, 6H); For the mixture of major **3u** and C5-alkylated product **3u'**,  $^{13}\text{C NMR}$  (75 MHz, Chloroform-*d*)  $\delta$  180.3, 178.2, 169.2, 165.2, 161.0, 159.9, 158.1, 143.7, 141.3, 140.5, 139.8, 135.0, 132.4, 131.1, 126.6, 126.3, 125.7, 124.6, 124.4, 121.2, 118.5, 118.1, 117.0, 113.4, 113.0, 77.6, 77.2, 76.7, 62.9, 61.6, 56.5, 56.2, 14.2, 14.0; **HRMS** (EI-MS)  $m/z$  calcd for  $\text{C}_{20}\text{H}_{18}\text{BrN}_3\text{O}_5$   $[\text{M}]^+$  459.0430, found 459.0426.

**Diethyl 2-(1-(benzo[d]thiazol-2-yl)-4-oxo-1,4-dihydroquinolin-2-yl)malonate (3w):**

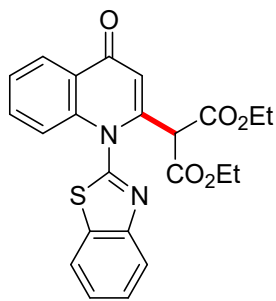

Slightly yellow sticky solid (39.3 mg, yield: 45%); purification by silica gel chromatography (Acetone:DCM= 1:20,  $R_f$  = 0.5);  $^1\text{H NMR}$  (300 MHz, Chloroform-*d*)  $\delta$  8.41 – 8.35 (m, 1H), 8.17 – 8.11 (m, 1H), 8.02 – 7.95 (m, 1H), 7.70 – 7.56 (m, 2H), 7.48 (ddd,  $J$  = 8.7, 7.1, 1.8 Hz, 1H), 7.37 (ddd,  $J$  = 8.0, 7.1, 1.1 Hz,

1H), 6.89 (dt,  $J$  = 8.5, 0.8 Hz, 1H), 6.51 (s, 1H), 4.52 (s, 1H), 4.19 (q,  $J$  = 7.1 Hz, 4H), 1.19 (t,  $J$  = 7.1 Hz, 6H);  $^{13}\text{C NMR}$  (75 MHz, Chloroform-*d*)  $\delta$  178.3, 165.2, 157.4, 149.8, 144.7, 142.2, 136.6, 132.8, 127.7, 127.6, 126.5, 125.6, 125.0, 124.9, 122.3, 117.4, 113.3, 63.0, 55.8, 14.0; **HRMS** (EI-MS)  $m/z$  calcd for  $\text{C}_{23}\text{H}_{20}\text{N}_2\text{O}_5\text{S}$   $[\text{M}]^+$  436.1093, found 436.1096.

**Diethyl 2-(4-oxo-1-(pyridin-2-yl)-1,4-dihydroquinolin-2-yl)malonate (3x):**

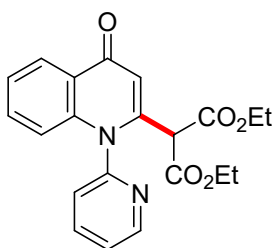

White solid (61.6 mg, yield: 81%); mp 137–139 °C; purification by silica gel chromatography (Acetone:DCM= 1:10,  $R_f$  = 0.21);  $^1\text{H}$  NMR (300 MHz, Chloroform-*d*)  $\delta$  8.71 (ddd,  $J$  = 4.9, 2.0, 0.8 Hz, 1H), 8.35 (dd,  $J$  = 8.0, 1.7 Hz, 1H), 7.98 (td,  $J$  = 7.7, 2.0 Hz, 1H), 7.55 (ddd,  $J$  = 7.6, 4.9, 1.0 Hz, 1H), 7.43 – 7.23 (m, 3H), 6.55 – 6.46 (m, 1H), 6.43 (s, 1H), 4.24 (s, 1H), 4.11 (q,  $J$  = 7.1 Hz, 4H), 1.16 (t,  $J$  = 7.1 Hz, 6H);  $^{13}\text{C}$  NMR (75 MHz, Chloroform-*d*)  $\delta$  178.0, 165.4, 151.2, 151.0, 144.8, 142.1, 139.8, 132.2, 126.2, 125.6, 125.5, 125.1, 124.1, 117.3, 111.8, 62.6, 55.8, 13.9; HRMS (EI-MS)  $m/z$  calcd for  $\text{C}_{21}\text{H}_{20}\text{N}_2\text{O}_5$   $[\text{M}]^+$  380.1372, found 380.1374.

**tetraethyl 2,2'-(6-methoxy-4-oxo-1-(pyrimidin-2-yl)-1,4-dihydroquinoline-2,5-diyl)dimalonate (3y):**

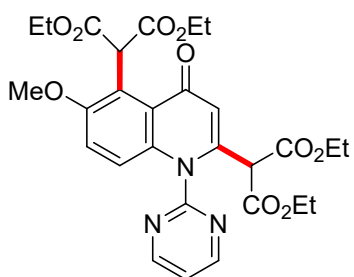

Sticky yellow solid (46.7 mg, yield: 82%); purification by silica gel chromatography (Acetone:DCM= 1:5,  $R_f$  = 0.5);  $^1\text{H}$  NMR (500 MHz, Chloroform-*d*)  $\delta$  8.97, 8.96, 7.56, 7.55, 7.54, 7.13, 7.11, 6.97, 6.54, 6.52, 6.29, 4.21, 4.19, 4.19, 4.18, 4.17, 4.16, 4.16, 4.15, 4.14, 4.14, 4.13, 4.09, 3.76, 1.24, 1.22, 1.22, 1.21, 1.20, 1.19;  $^{13}\text{C}$  NMR (126 MHz,  $\text{CDCl}_3$ )  $\delta$  180.0, 168.8, 165.2, 160.4, 158.4, 154.7, 142.5, 137.6, 124.2, 122.9, 121.9, 118.7, 117.8, 112.7, 62.8, 61.1, 57.0, 56.1, 49.9, 14.2, 14.0; HRMS (EI-MS)  $m/z$  calcd for  $\text{C}_{28}\text{H}_{31}\text{N}_3\text{O}_{10}$   $[\text{M}]^+$  569.2009, found 569.2013.

## Characterization of products 4

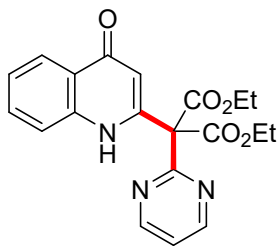

### Diethyl 2-(4-oxo-1,4-dihydroquinolin-2-yl)-2-(pyrimidin-2-yl)malonate (4a):

White solid (58.7 mg, yield: 77%); mp 175–177 °C; purification by silica gel chromatography (Acetone:DCM= 1:5,  $R_f$  = 0.15);  $^1\text{H}$  NMR (300 MHz, Chloroform-*d*)  $\delta$  11.53 (s, 1H), 8.74 (d,  $J$  = 4.9 Hz, 2H), 8.32 – 8.24 (m, 1H), 7.54 (ddd,  $J$  = 8.4, 7.0, 1.5 Hz, 1H), 7.36 (dt,  $J$  = 8.2, 0.9 Hz, 1H), 7.33 – 7.24 (m, 2H), 6.15 (d,  $J$  = 1.9 Hz, 1H), 4.31 (q,  $J$  = 7.1 Hz, 4H), 1.22 (t,  $J$  = 7.1 Hz, 6H);  $^{13}\text{C}$  NMR (75 MHz, Chloroform-*d*)  $\delta$  178.5, 167.1, 165.1, 157.2, 146.2, 139.3, 132.1, 125.9, 125.3, 123.9, 120.5, 118.2, 113.0, 69.7, 63.5, 13.7; HRMS (EI-MS)  $m/z$  calcd for  $\text{C}_{20}\text{H}_{19}\text{N}_3\text{O}_5$   $[\text{M}]^+$  381.1325, found 381.1327.

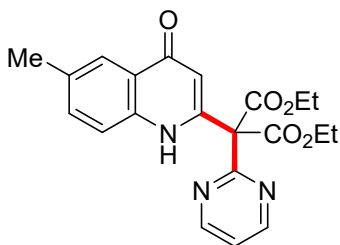

### Diethyl 2-(6-methyl-4-oxo-1,4-dihydroquinolin-2-yl)-2-(pyrimidin-2-yl)malonate (4b):

Slightly yellow solid (69.6 mg, yield: 88%); mp 185–187 °C; purification by silica gel chromatography (Acetone:DCM= 1:3,  $R_f$  = 0.25);  $^1\text{H}$  NMR (300 MHz, Chloroform-*d*)  $\delta$  11.43 (s, 1H), 8.78 (d,  $J$  = 4.9 Hz, 2H), 8.12 (d,  $J$  = 2.0 Hz, 1H), 7.41 (dd,  $J$  = 8.4, 2.1 Hz, 1H), 7.38 – 7.27 (m, 2H), 6.14 (d,  $J$  = 1.9 Hz, 1H), 4.42 – 4.28 (m, 4H), 2.44 (s, 3H), 1.25 (t,  $J$  = 7.1 Hz, 6H);  $^{13}\text{C}$  NMR (75 MHz, Chloroform-*d*)  $\delta$  178.5, 167.3, 165.3, 157.3, 145.9, 137.4, 134.0, 133.7, 125.4, 125.3, 120.5, 118.1, 112.9, 69.7, 63.6, 21.2, 13.8; HRMS (EI-MS)  $m/z$  calcd for  $\text{C}_{21}\text{H}_{21}\text{N}_3\text{O}_5$   $[\text{M}]^+$  395.1481, found 395.1479.

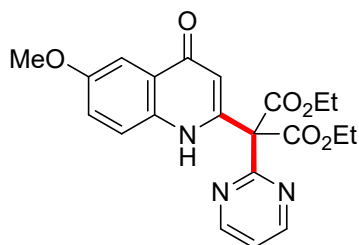

**Diethyl 2-(6-methoxy-4-oxo-1,4-dihydroquinolin-2-yl)-2-**

**(pyrimidin-2-yl)malonate (4c):** Slightly yellow solid (46.1

mg, yield: 56%); mp 183–185 °C; purification by silica gel chromatography (Acetone:DCM= 1:3  $R_f$ = 0.25);  $^1\text{H}$  NMR (300

MHz, Chloroform-*d*)  $\delta$  11.55 (s, 1H), 8.78 (d,  $J$  = 4.9 Hz, 2H),

7.70 (d,  $J$  = 2.9 Hz, 1H), 7.37 – 7.29 (m, 2H), 7.22 (dd,  $J$  = 9.0, 2.9 Hz, 1H), 6.16 (d,  $J$  = 1.9

Hz, 1H), 4.34 (q,  $J$  = 7.1 Hz, 4H), 3.89 (s, 3H), 1.25 (t,  $J$  = 7.1 Hz, 6H);  $^{13}\text{C}$  NMR (75 MHz,

Chloroform-*d*)  $\delta$  178.0, 167.3, 165.3, 157.3, 156.7, 145.3, 134.0, 126.5, 123.5, 120.5, 119.8,

112.1, 104.6, 69.6, 63.6, 55.9, 13.8; HRMS (EI-MS)  $m/z$  calcd for  $\text{C}_{21}\text{H}_{21}\text{N}_3\text{O}_6$   $[\text{M}]^+$

411.1430, found 411.1427.

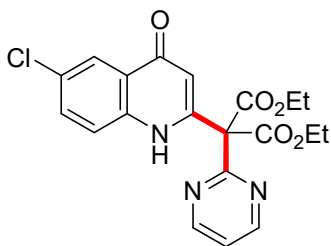

**Diethyl 2-(6-chloro-4-oxo-1,4-dihydroquinolin-2-yl)-2-**

**(pyrimidin-2-yl)malonate (4d):** White solid (48.2 mg, yield:

58%); mp 185–187 °C; purification by silica gel chromatography (Acetone:DCM= 1:7  $R_f$ = 0.5);  $^1\text{H}$  NMR (300

MHz, Chloroform-*d*)  $\delta$  11.60 (s, 1H), 8.78 (d,  $J$  = 4.9 Hz, 2H),

8.30 (d,  $J$  = 2.4 Hz, 1H), 7.53 (dd,  $J$  = 8.8, 2.4 Hz, 1H), 7.39 – 7.31 (m, 2H), 6.17 (d,  $J$  = 1.7

Hz, 1H), 4.35 (q,  $J$  = 7.1 Hz, 4H), 1.26 (t,  $J$  = 7.1 Hz, 6H).  $^{13}\text{C}$  NMR (75 MHz, Chloroform-*d*)

$\delta$  177.4, 167.2, 165.1, 157.3, 146.6, 137.7, 132.6, 130.0, 126.4, 125.5, 120.6, 119.9, 113.3,

69.6, 63.7, 13.8; HRMS (EI-MS)  $m/z$  calcd for  $\text{C}_{20}\text{H}_{18}\text{ClN}_3\text{O}_5$   $[\text{M}]^+$  415.0935, found

415.0937.

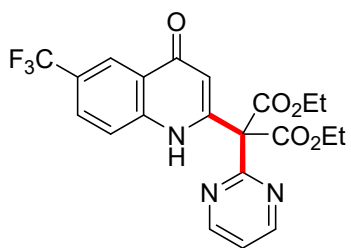

**Diethyl 2-(4-oxo-6-(trifluoromethyl)-1,4-dihydroquinolin-**

**2-yl)-2-(pyrimidin-2-yl)malonate (4e):** White solid (69.2 mg,

yield: 77%); mp 199–201 °C; purification by silica gel

chromatography (Acetone:DCM= 1:5,  $R_f$  = 0.38);  $^1\text{H NMR}$

(300 MHz, Chloroform-*d*)  $\delta$  11.80 (s, 1H), 8.75 (d,  $J$  = 4.9 Hz,

2H), 8.62 – 8.55 (m, 1H), 7.73 (dd,  $J$  = 8.7, 2.2 Hz, 1H), 7.51 (d,  $J$  = 8.7 Hz, 1H), 7.32 (t,  $J$

= 4.9 Hz, 1H), 6.20 (d,  $J$  = 1.9 Hz, 1H), 4.32 (q,  $J$  = 7.1 Hz, 4H), 1.23 (t,  $J$  = 7.1 Hz, 6H);

$^{13}\text{C NMR}$  (75 MHz, Chloroform-*d*)  $\delta$  177.9, 166.9, 164.9, 157.3, 147.3, 141.1, 128.3 (q,  $J$  =

3.3 Hz), 127.6 (q,  $J$  = 270.8 Hz), 125.9 (q,  $J$  = 33.0 Hz), 124.7, 124.2 (q,  $J$  = 4.2 Hz), 122.2,

120.7, 119.3, 118.6, 114.0, 77.6, 77.2, 76.7, 69.7, 63.7, 13.7;  $^{19}\text{F NMR}$  (471 MHz,

Chloroform-*d*)  $\delta$  -62.0; **HRMS** (EI-MS)  $m/z$  calcd for  $\text{C}_{21}\text{H}_{18}\text{F}_3\text{N}_3\text{O}_5$   $[\text{M}]^+$  449.1199, found

449.1195.

**Diethyl 2-(6-nitro-4-oxo-1,4-dihydroquinolin-2-yl)-2-(pyrimidin-2-yl)malonate (4f):**

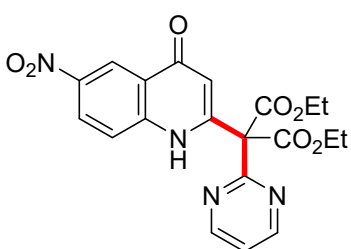

White solid (36.7 mg, yield: 43%); mp 207–209 °C;

purification by silica gel chromatography (Acetone:DCM= 1:7,

$R_f$  = 0.63);  $^1\text{H NMR}$  (300 MHz, Chloroform-*d*)  $\delta$  11.92 (s, 1H),

9.16 (d,  $J$  = 2.6 Hz, 1H), 8.80 (d,  $J$  = 4.9 Hz, 2H), 8.37 (dd,  $J$  =

9.1, 2.6 Hz, 1H), 7.52 (d,  $J$  = 9.1 Hz, 1H), 7.38 (t,  $J$  = 4.9 Hz, 1H), 6.22 (d,  $J$  = 1.8 Hz, 1H),

4.35 (q,  $J$  = 7.1 Hz, 4H), 1.25 (t,  $J$  = 7.1 Hz, 6H);  $^{13}\text{C NMR}$  (75 MHz, Chloroform-*d*)  $\delta$

177.7, 166.8, 164.8, 157.4, 147.5, 143.8, 142.8, 126.4, 124.7, 123.2, 120.8, 119.6, 114.5,

69.6, 63.9, 13.8; **HRMS** (EI-MS)  $m/z$  calcd for  $\text{C}_{20}\text{H}_{18}\text{N}_4\text{O}_7$   $[\text{M}]^+$  426.1175, found 426.1174.

**Diethyl 2-(7-methoxy-4-oxo-1,4-dihydroquinolin-2-yl)-2-**

**(pyrimidin-2-yl)malonate (4g):** Slightly yellow solid (60.9

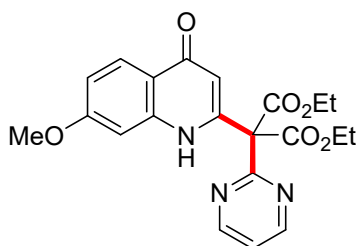

mg, yield: 74%); mp 179–181 °C; purification by silica gel chromatography (Acetone:DCM= 1:7,  $R_f$  = 0.26);  $^1\text{H NMR}$  (300 MHz, Chloroform-*d*)  $\delta$  11.61 (s, 1H), 8.72 (d,  $J$  = 4.9 Hz, 2H), 8.16 (d,  $J$  = 9.0 Hz, 1H), 7.31 – 7.23 (m, 1H), 6.93 – 6.83 (m, 1H), 6.79 (d,  $J$  = 2.3 Hz, 1H), 6.10 (s, 1H), 4.30 (q,  $J$  = 7.1 Hz, 4H), 3.82 (s, 3H), 1.21 (t,  $J$  = 7.1 Hz, 6H);  $^{13}\text{C NMR}$  (75 MHz, Chloroform-*d*)  $\delta$  167.1, 165.0, 163.0, 157.2, 146.3, 141.3, 127.5, 120.5, 119.4, 114.6, 112.5, 99.2, 69.9, 63.5, 55.7, 13.8; **HRMS** (EI-MS)  $m/z$  calcd for  $\text{C}_{21}\text{H}_{21}\text{N}_3\text{O}_6$   $[\text{M}]^+$  411.1430, found 411.1428.

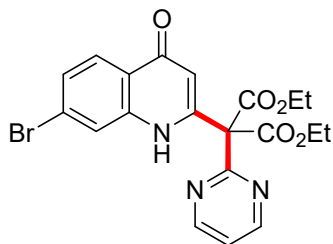

**Diethyl 2-(7-bromo-4-oxo-1,4-dihydroquinolin-2-yl)-2-(pyrimidin-2-yl)malonate (4h):** White solid (52.5 mg, yield:

57%); mp 201–203 °C; purification by silica gel chromatography (Acetone:DCM= 1:7,  $R_f$  = 0.25);  $^1\text{H NMR}$  (300 MHz, Chloroform-*d*)  $\delta$  11.51 (s, 1H), 8.80 (d,  $J$  = 4.9 Hz, 2H), 8.18 (d,  $J$  = 8.6 Hz, 1H), 7.58 (d,  $J$  = 1.7 Hz, 1H), 7.41 (dd,  $J$  = 8.6, 1.7 Hz, 1H), 7.36 (t,  $J$  = 4.9 Hz, 1H), 6.17 (d,  $J$  = 1.9 Hz, 1H), 4.35 (q,  $J$  = 7.1 Hz, 4H), 1.26 (t,  $J$  = 7.1 Hz, 6H);  $^{13}\text{C NMR}$  (75 MHz, Chloroform-*d*)  $\delta$  178.1, 167.1, 165.1, 157.3, 146.6, 140.1, 127.9, 127.5, 126.7, 124.2, 120.8, 120.7, 113.7, 69.6, 63.7, 13.9; **HRMS** (EI-MS)  $m/z$  calcd for  $\text{C}_{20}\text{H}_{18}\text{BrN}_3\text{O}_5$   $[\text{M}]^+$  459.0430, found 459.0430.

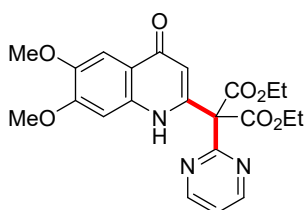

**Diethyl 2-(6,7-dimethoxy-4-oxo-1,4-dihydroquinolin-2-yl)-2-(pyrimidin-2-yl)malonate (4j):** White solid (32.7 mg, yield: 37%);

mp 207–209 °C; purification by silica gel chromatography (Acetone:DCM= 1:1,  $R_f$  = 0.20);  $^1\text{H NMR}$  (300 MHz,

Chloroform-*d*)  $\delta$  11.37 (s, 1H), 8.78 (d,  $J = 4.9$  Hz, 2H), 7.67 (s, 1H), 7.33 (t,  $J = 4.9$  Hz, 1H), 6.74 (s, 1H), 6.10 (d,  $J = 1.7$  Hz, 1H), 4.35 (qd,  $J = 7.1, 1.0$  Hz, 4H), 3.97 (s, 6H), 1.26 (t,  $J = 7.1$  Hz, 6H);  $^{13}\text{C}$  NMR (75 MHz, Chloroform-*d*)  $\delta$  177.5, 167.5, 165.4, 157.3, 153.9, 147.6, 144.8, 135.1, 120.5, 119.7, 112.4, 105.0, 99.0, 69.6, 63.6, 56.4, 56.4, 13.9; **HRMS** (EI-MS)  $m/z$  calcd for  $\text{C}_{22}\text{H}_{23}\text{N}_3\text{O}_7$   $[\text{M}]^+$  441.1536, found 441.1536.

**Diethyl 2-(6-(1,3-diethoxy-1,3-dioxopropan-2-yl)-4-oxo-1,4-dihydropyridin-2-yl)-2-**

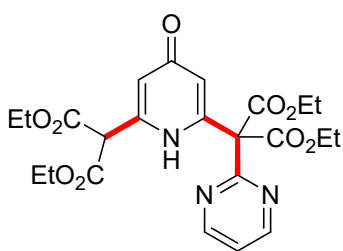

**(pyrimidin-2-yl)malonate (4k):** White solid (73.4 mg, yield: 75%); mp 120–122 °C; purification by silica gel chromatography (Acetone:DCM= 1:3,  $R_f = 0.25$ );  $^1\text{H}$  NMR (300 MHz, DMSO-*d*<sub>6</sub>)  $\delta$  10.7 (s, 1H), 8.8 (d,  $J = 4.9$  Hz, 2H),

7.4 (t,  $J = 4.9$  Hz, 1H), 7.0 (d,  $J = 2.1$  Hz, 1H), 6.7 (d,  $J = 2.1$  Hz, 1H), 4.8 (s, 1H), 4.1 (m,  $J = 16.4, 14.2, 8.4, 5.3$  Hz, 8H), 1.1 (q,  $J = 7.0$  Hz, 13H);  $^{13}\text{C}$  NMR (75 MHz, DMSO-*d*<sub>6</sub>)  $\delta$  167.2, 167.0, 166.0, 164.1, 157.1, 156.6, 152.4, 120.2, 111.4, 110.4, 74.1, 61.4, 59.5, 40.4, 40.1, 39.8, 39.7, 39.5, 39.4, 39.2, 39.0, 38.7, 13.9, 13.7; **HRMS** (EI-MS)  $m/z$  calcd for  $\text{C}_{23}\text{H}_{27}\text{N}_3\text{O}_9$   $[\text{M}]^+$  489.1747 found 489.1747.

**Diethyl 2-(6-oxo-1,6-dihydropyridin-2-yl)-2-(pyrimidin-2-yl)malonate (4l):**

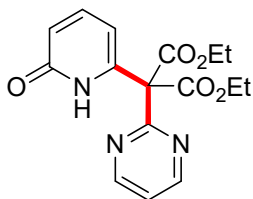

Slightly brown solid (25.8 mg, yield: 39%); mp 155–157 °C; purification by silica gel chromatography (Acetone:DCM= 1:1,  $R_f =$

0.25);  $^1\text{H}$  NMR (300 MHz, Chloroform-*d*)  $\delta$  11.25 (s, 1H), 8.77 (d,  $J = 4.9$  Hz, 2H), 7.41 – 7.30 (m, 2H), 6.50 (dd,  $J = 9.2, 0.9$  Hz, 1H), 6.21 (dd,  $J = 7.1, 0.9$  Hz, 1H), 4.31 (q,  $J = 7.1$  Hz, 4H), 1.24 (t,  $J = 7.1$  Hz, 6H);  $^{13}\text{C}$  NMR (75 MHz, Chloroform-*d*)  $\delta$  166.6, 164.8, 163.0,

157.3, 141.6, 140.5, 120.6, 120.5, 108.0, 69.6, 63.4, 13.8; **HRMS** (EI-MS)  $m/z$  calcd for  $C_{16}H_{17}N_3O_5$   $[M]^+$  331.1168, found 331.1171.

**Diethyl 2-(1-oxo-1,2-dihydroisoquinolin-3-yl)-2-(pyrimidin-2-yl)malonate (4m):**

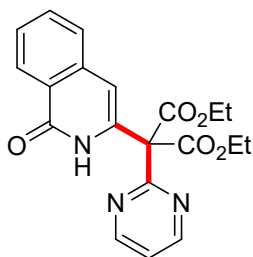

Slightly yellow solid (68.7 mg, yield: 90%); mp 157–159 °C; purification by silica gel chromatography (Acetone:DCM= 1:7,  $R_f$  = 0.50);  $^1H$  NMR (300 MHz, Chloroform-*d*)  $\delta$  10.61 (s, 1H), 8.79 (d,  $J$  = 5.0 Hz, 2H), 8.42 – 8.32 (m, 1H), 7.62 (ddd,  $J$  = 8.2, 7.0, 1.4 Hz, 1H), 7.54 – 7.43 (m, 2H), 7.33 (t,  $J$  = 4.9 Hz, 1H), 6.62 (d,  $J$  = 1.9 Hz, 1H), 4.36 (q,  $J$  = 7.1 Hz, 4H), 1.27 (t,  $J$  = 7.1 Hz, 6H);  $^{13}C$  NMR (75 MHz, Chloroform-*d*)  $\delta$  166.9, 165.2, 162.7, 157.3, 137.4, 134.8, 132.6, 127.4, 127.3, 127.0, 125.6, 120.5, 108.3, 70.0, 63.3, 13.9; **HRMS** (EI-MS)  $m/z$  calcd for  $C_{20}H_{19}N_3O_5$   $[M]^+$  381.1325, found 381.1328.



**Dimethyl 2-(4-oxo-1,4-dihydroquinolin-2-yl)-2-(pyrimidin-2-yl)malonate (4n):**

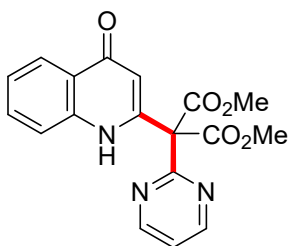

White solid (49.5 mg, yield: 70%); mp 207–209 °C; purification by silica gel chromatography (Acetone:DCM= 1:7,  $R_f$  = 0.25);  $^1\text{H}$  NMR (300 MHz, Chloroform-*d*)  $\delta$  11.45 (s, 1H), 8.80 (d,  $J$  = 5.0 Hz, 2H), 8.36 – 8.30 (m, 1H), 7.60 (ddd,  $J$  = 8.4, 7.0, 1.5 Hz, 1H), 7.42 – 7.30 (m, 3H), 6.14 (d,  $J$  = 2.0 Hz, 1H), 3.88 (s, 6H);  $^{13}\text{C}$  NMR (75 MHz, Chloroform-*d*)  $\delta$  178.6, 167.6, 164.9, 157.3, 146.0, 139.4, 132.2, 125.9, 125.3, 124.0, 120.6, 118.3, 113.0, 69.9, 54.2; HRMS (EI-MS)  $m/z$  calcd for  $\text{C}_{18}\text{H}_{15}\text{N}_3\text{O}_5$   $[\text{M}]^+$  353.1012, found 353.1008.

**Dibenzyl 2-(4-oxo-1,4-dihydroquinolin-2-yl)-2-(pyrimidin-2-yl)malonate (4o):**

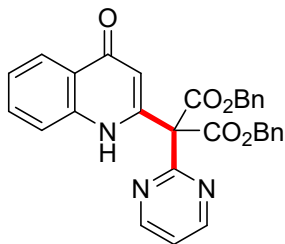

Slightly yellow solid (68.8 mg, yield: 68%); mp 165–167 °C; purification by silica gel chromatography (Acetone:DCM= 1:7,  $R_f$  = 0.45);  $^1\text{H}$  NMR (300 MHz, Chloroform-*d*)  $\delta$  11.35 (s, 1H), 8.70 (d,  $J$  = 4.9 Hz, 2H), 8.31 (dd,  $J$  = 8.4, 1.5 Hz, 1H), 7.62 – 7.54 (m, 1H), 7.38 – 7.28 (m, 4H), 7.26 – 7.13 (m, 9H), 6.23 (s, 1H), 5.32 – 5.20 (m, 4H);  $^{13}\text{C}$  NMR (75 MHz, Chloroform-*d*)  $\delta$  178.5, 166.8, 164.8, 157.2, 146.0, 139.4, 134.4, 132.2, 128.5, 128.4, 128.3, 128.2, 125.9, 125.2, 124.0, 120.6, 118.3, 112.9, 70.0, 68.9; HRMS (EI-MS)  $m/z$  calcd for  $\text{C}_{30}\text{H}_{23}\text{N}_3\text{O}_5$   $[\text{M}]^+$  505.1638, found 505.1635.

**Methyl 2-(4-oxo-1,4-dihydroquinolin-2-yl)-2-(pyrimidin-2-yl)-2-tosylacetate (4p):**

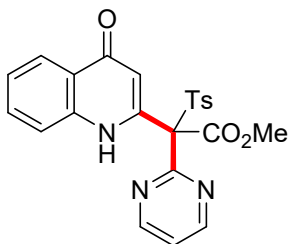

Slightly yellow solid (53.9 mg, yield: 60%); mp 198–200 °C; purification by silica gel chromatography

(Acetone:DCM= 1:7,  $R_f$  = 0.38);  $^1\text{H NMR}$  (300 MHz, Chloroform-*d*)  $\delta$  12.38 (s, 1H), 8.93 (d,  $J$  = 5.0 Hz, 2H), 8.32 (dd,  $J$  = 8.1, 1.5 Hz, 1H), 7.71 – 7.60 (m, 3H), 7.58 – 7.47 (m, 2H), 7.38 (ddd,  $J$  = 8.1, 6.9, 1.1 Hz, 1H), 7.17 (d,  $J$  = 8.2 Hz, 2H), 5.68 (d,  $J$  = 1.8 Hz, 1H), 3.81 (s, 3H);  $^{13}\text{C NMR}$  (75 MHz, Chloroform-*d*)  $\delta$  177.7, 165.4, 161.2, 157.1, 146.6, 141.8, 139.4, 132.5, 132.0, 131.5, 129.0, 125.9, 125.4, 124.3, 121.5, 118.6, 114.1, 84.0, 53.9, 21.8; **HRMS** (EI-MS)  $m/z$  calcd for  $\text{C}_{23}\text{H}_{19}\text{N}_3\text{O}_5\text{S}$   $[\text{M}]^+$  449.1045, found 449.1043.

**Diethyl 2-(4-methylpyrimidin-2-yl)-2-(4-oxo-1,4-dihydroquinolin-**

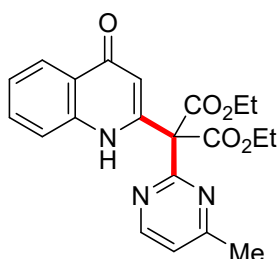

**2-yl)malonate (4q):** Slightly yellow solid (55.4 mg, yield: 70%); mp 161–163 °C; purification by silica gel chromatography (Acetone:DCM= 1:5,  $R_f$  = 0.18);  $^1\text{H NMR}$  (300 MHz, Chloroform-*d*)  $\delta$  11.79 (s, 1H), 8.59 (d,  $J$  = 5.1 Hz, 1H), 8.29 (dd,  $J$  = 8.2, 1.5 Hz,

1H), 7.55 (s, 1H), 7.38 – 7.24 (m, 2H), 7.16 (d,  $J$  = 5.2 Hz, 1H), 6.18 (d,  $J$  = 1.8 Hz, 1H), 4.31 (q,  $J$  = 7.1 Hz, 4H), 2.53 (s, 3H), 1.23 (t,  $J$  = 7.1 Hz, 6H);  $^{13}\text{C NMR}$  (75 MHz, Chloroform-*d*)  $\delta$  178.6, 167.8, 167.1, 164.5, 156.6, 146.3, 139.3, 132.1, 125.9, 125.3, 123.8, 120.1, 118.1, 113.0, 69.5, 63.4, 24.2, 13.8; **HRMS** (EI-MS)  $m/z$  calcd for  $\text{C}_{21}\text{H}_{21}\text{N}_3\text{O}_5$   $[\text{M}]^+$  395.1481, found 395.1478.

**3-(4-oxo-1,4-dihydroquinolin-2-yl)-3-(pyrimidin-2-yl)pentane-**

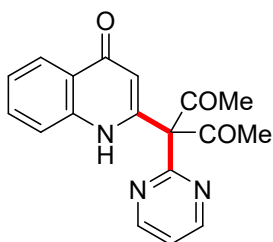

**2,4-dione (4r):** Slightly yellow solid (37.9 mg, yield: 59%); mp 80–82 °C; purification by silica gel chromatography (MeOH: DCM = 1:30,  $R_f$  = 0.2);  $^1\text{H NMR}$  (400 MHz, Chloroform-*d*)  $\delta$  8.91 (d,  $J$  = 4.9 Hz, 2H), 8.49 (dd,  $J$  = 8.0, 1.6 Hz, 1H), 7.55 – 7.44 (m, 2H), 7.41 (t,

$J$  = 7.5 Hz, 1H), 6.60 (d,  $J$  = 8.5 Hz, 1H), 6.38 (s, 1H), 2.12 (s, 6H);  $^{13}\text{C NMR}$  (75 MHz,

Chloroform-*d*)  $\delta$  192.0, 178.8, 159.9, 159.1, 147.5, 141.4, 132.5, 126.6, 125.6, 124.5, 121.6, 117.1, 114.5, 109.7, 24.4; **HRMS** (EI-MS)  $m/z$  calcd for  $C_{18}H_{16}N_3O_3$   $[M+H]^+$  322.1192, found 322.1190.

**Diethyl 2-(5-methylpyrimidin-2-yl)-2-(4-oxo-1,4-dihydroquinolin-2-yl)malonate (4s):**

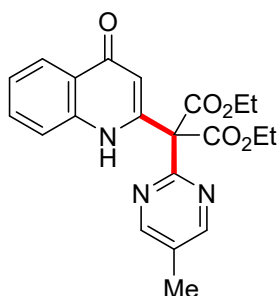

Slightly yellow solid (36.4 mg, yield: 46%); mp 75–78 °C; purification by silica gel chromatography (Acetone:DCM= 1:5,  $R_f$  = 0.20);  **$^1H$  NMR** (300 MHz, Chloroform-*d*)  $\delta$  11.62 (s, 1H), 8.59 (d,  $J$  = 0.8 Hz, 2H), 8.30 (dd,  $J$  = 8.2, 1.5 Hz, 1H), 7.57 (ddd,  $J$  = 8.4, 7.0, 1.5 Hz, 1H), 7.37 (d,  $J$  = 8.2 Hz, 1H), 7.30 (ddd,  $J$  = 8.1, 7.0, 1.1 Hz, 1H), 6.17 (s, 1H), 4.39 – 4.27 (m, 4H), 2.39 – 2.29 (m, 3H), 1.24 (t,  $J$  = 7.1 Hz, 6H);  **$^{13}C$  NMR** (75 MHz, Chloroform-*d*)  $\delta$  178.5, 167.3, 162.4, 157.3, 146.5, 139.3, 132.1, 130.3, 125.9, 125.3, 124.0, 118.2, 112.9, 69.3, 63.5, 15.6, 13.8; **HRMS** (EI-MS)  $m/z$  calcd for  $C_{21}H_{21}N_3O_5$   $[M]^+$  395.1481, found 395.1482.

**Diethyl 2-(7-methoxy-4-oxo-1,4-dihydroquinolin-2-yl)-2-(5-methylpyrimidin-2-yl)malonate (4t):**

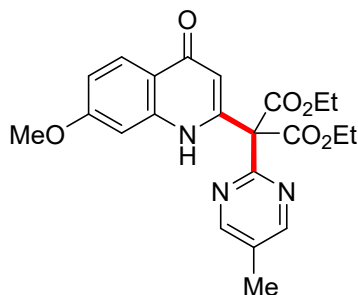

White solid (59.6 mg, yield: 70%); mp 180–182 °C; purification by silica gel chromatography (Acetone:DCM= 1:5,  $R_f$  = 0.25);  **$^1H$  NMR** (300 MHz, Chloroform-*d*)  $\delta$  11.37 (s, 1H), 8.58 (d,  $J$  = 0.8 Hz, 2H), 8.20 (d,  $J$  = 9.0 Hz, 1H), 6.89 (dd,  $J$  = 9.0, 2.3 Hz, 1H), 6.70 (d,  $J$  = 2.3 Hz, 1H), 6.06 (d,  $J$  = 1.9 Hz, 1H), 4.32 (qd,  $J$  = 7.1, 0.8 Hz, 4H), 3.85 (s, 3H), 2.33 (t,  $J$  = 0.7 Hz, 3H), 1.24 (t,  $J$  = 7.1 Hz, 6H);  **$^{13}C$  NMR** (75 MHz, Chloroform-*d*)  $\delta$  178.1, 167.4, 162.9, 162.5, 157.3, 146.0,

141.1, 130.2, 127.7, 119.8, 114.1, 113.0, 99.1, 69.3, 63.5, 55.7, 15.6, 13.8; **HRMS** (EI-MS)  $m/z$  calcd for  $C_{22}H_{23}N_3O_6$   $[M]^+$  425.1587, found 425.1587.

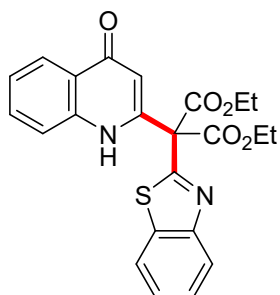

**Diethyl 2-(benzo[d]thiazol-2-yl)-2-(4-oxo-1,4-dihydroquinolin-2-yl)malonate (4u):** Slightly orange solid (24.4 mg, yield: 28%); mp

272–274 °C; purification by silica gel chromatography (Acetone:DCM= 1:20,  $R_f$ = 0.25);  $^1H$  NMR (300 MHz, Chloroform-*d*)  $\delta$  10.92 (s, 1H), 8.27 (dd,  $J$  = 8.2, 1.5 Hz, 1H), 8.04 – 7.96 (m, 1H), 7.89 (dd,  $J$  = 7.6, 1.5 Hz, 1H), 7.58 (ddd,  $J$  = 8.5, 6.9, 1.5 Hz,

1H), 7.51 – 7.36 (m, 3H), 7.36 – 7.25 (m, 1H), 6.19 (d,  $J$  = 1.8 Hz, 1H), 4.41 (q,  $J$  = 7.1 Hz, 4H), 1.30 (t,  $J$  = 7.1 Hz, 6H);  $^{13}C$  NMR (75 MHz, Chloroform-*d*)  $\delta$  178.2, 165.9, 164.2, 151.2, 145.1, 138.9, 135.2, 132.0, 126.1, 125.7, 125.6, 124.9, 123.9, 123.1, 121.3, 117.9, 109.6, 64.0, 63.6, 13.5; **HRMS** (EI-MS)  $m/z$  calcd for  $C_{23}H_{20}N_2O_5S$   $[M]^+$  436.1093, found 436.1095.

**diethyl 2-(5-(1,3-diethoxy-1,3-dioxopropan-2-yl)-6-methoxy-4-oxo-1,4-dihydroquinolin-2-yl)-2-(pyrimidin-2-yl)malonate (4x):**

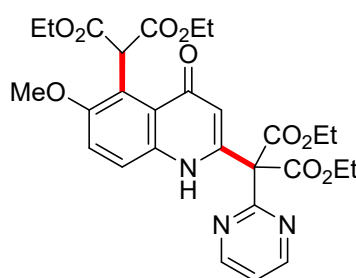

Slightly yellow solid (46.7 mg, yield: 57%); mp 60–62 °C; purification by silica gel chromatography (Acetone:DCM= 1:5,  $R_f$  = 0.3);  $^1H$  NMR (500 MHz, Chloroform-*d*)  $\delta$  11.38, 8.77, 8.76, 7.39, 7.37, 7.33, 7.33, 7.32, 7.31, 7.21, 6.05, 6.05,

4.37, 4.36, 4.36, 4.35, 4.35, 4.34, 4.33, 4.33, 4.32, 4.32, 4.23, 4.23, 4.22, 4.21, 4.21, 4.20, 4.19, 4.18, 4.18, 4.17, 3.82, 1.28, 1.26, 1.26, 1.25, 1.24, 1.24, 1.23;  $^{13}C$  NMR (126 MHz, Chloroform-*d*)  $\delta$  211.0, 180.2, 169.2, 167.2, 165.2, 157.3, 154.7, 144.7, 135.5, 123.7, 122.6,

120.5, 119.8, 118.8, 113.3, 69.6, 69.1, 63.6, 61.1, 57.4, 53.9, 49.8, 31.9, 29.8, 29.4, 14.3,  
13.9; **HRMS** (EI-MS) *m/z* calcd for C<sub>28</sub>H<sub>31</sub>N<sub>3</sub>O<sub>10</sub> [M]<sup>+</sup> 569.2009, found 569.2010.

## 7. Single crystal X-ray diffraction data

Single-crystal X-ray diffraction data were collected using an Bruker SMART APEX2 ULTRA and a APEX II CCD area detector with a multilayer-monochromated Mo K $\alpha$  radiation ( $\lambda = 0.71073 \text{ \AA}$ ) generated by a rotating anode. Data collection, data reduction, and semiempirical absorption correction were carried out using the software package APEX2.\* All of the calculations for the structure determination were carried out using the SHELXTL package.\*\* All non-H atoms were refined anisotropically. All hydrogen atoms were included in calculated positions with isotropic thermal parameters 1.2 times those of attached atoms. The ellipsoids are drawn at the 50% probability level.

\* APEX2 (Version 2009.1–0) Data Collection and Processing Software; Bruker AXS Inc.: Madison, Wisconsin, U.S.A., 2008.

\*\* SHELXTL-PC (Version 6.22) Program for Solution and Refinement of Crystal Structures; Bruker AXS Inc.: Madison, Wisconsin, U.S.A., 2001.

## X-ray crystallographic data of 4a (CCDC No. 2295767)

Single-crystal sample (**4a**) was prepared in DMSO. The ethyl group residue shows a disorder (Figure S5).

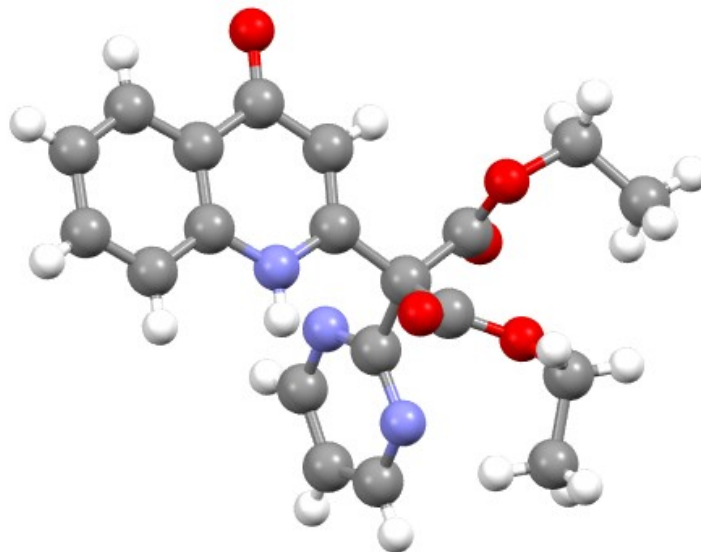

**Figure S5.** X-ray crystal structure of **4a**. The main residue disorder is 50%.

**Table S3.** Crystal data and structure refinement for **4a**.

|                      |                                                               |                                |
|----------------------|---------------------------------------------------------------|--------------------------------|
| Identification code  | 4a                                                            |                                |
| Empirical formula    | C <sub>20</sub> H <sub>19</sub> N <sub>3</sub> O <sub>5</sub> |                                |
| Formula weight       | 381.38                                                        |                                |
| Temperature          | 93(2) K                                                       |                                |
| Wavelength           | 0.71073 Å                                                     |                                |
| Crystal system       | Triclinic                                                     |                                |
| Space group          | P-1                                                           |                                |
| Unit cell dimensions | a = 8.7958(3) Å                                               | $\alpha = 84.9440(10)^\circ$ . |
|                      | b = 13.0685(4) Å                                              | $\beta = 84.5000(10)^\circ$ .  |
|                      | c = 16.1565(5) Å                                              | $\gamma = 86.6780(10)^\circ$ . |
| Volume               | 1839.12(10) Å <sup>3</sup>                                    |                                |

|                                   |                                             |
|-----------------------------------|---------------------------------------------|
| Z                                 | 4                                           |
| Density (calculated)              | 1.377 Mg/m <sup>3</sup>                     |
| Absorption coefficient            | 0.101 mm <sup>-1</sup>                      |
| F(000)                            | 800                                         |
| Crystal size                      | 0.502 x 0.483 x 0.475 mm <sup>3</sup>       |
| Theta range for data collection   | 1.566 to 27.495°.                           |
| Index ranges                      | -11<=h<=11, -16<=k<=16, -20<=l<=20          |
| Reflections collected             | 49692                                       |
| Independent reflections           | 8390 [R(int) = 0.0307]                      |
| Completeness to theta = 25.242°   | 99.9 %                                      |
| Absorption correction             | Semi-empirical from equivalents             |
| Max. and min. transmission        | 0.7455 and 0.7226                           |
| Refinement method                 | Full-matrix least-squares on F <sup>2</sup> |
| Data / restraints / parameters    | 8390 / 0 / 523                              |
| Goodness-of-fit on F <sup>2</sup> | 1.036                                       |
| Final R indices [I>2sigma(I)]     | R1 = 0.0470, wR2 = 0.1236                   |
| R indices (all data)              | R1 = 0.0510, wR2 = 0.1270                   |
| Extinction coefficient            | n/a                                         |
| Largest diff. peak and hole       | 0.571 and -0.360 e.Å <sup>-3</sup>          |



## 8. Computational Details

All calculations were conducted using the Gaussian 09<sup>1</sup> software package in the framework of the density functional theory (DFT).<sup>2</sup> Geometry optimizations were performed using the B3LYP functional<sup>3</sup> with Grimme's D3 correction,<sup>4</sup> and the 6-31G(d,p) basis set.<sup>5</sup> Vibrational frequency calculations were carried out at the same level of theory as that used for geometry optimizations, wherein thermochemistry correction energy ( $G - E$ ) was acquired. Transition states were located by the presence of one imaginary frequency and confirmed by intrinsic reaction coordinate (IRC) calculations.<sup>6,7</sup> The single-point calculations of the optimized geometries were performed with B3LYP functional with Grimme's D3 correction.<sup>4</sup> For all calculations, the solvation environment was considered with PCM<sup>8</sup> solvation model with DMSO ( $\epsilon = 46.826$ ) as the solvent. Finally, to increase the accuracy of the integration grid, we used the `int = ultrafine` option for all types of calculations. Figures of three-dimensional molecular structures were prepared using CYLview.<sup>9</sup>

Final solution phase Gibbs free energies were calculated as follows:

$$G_{\text{sol}} = E_{\text{sol}} + (G - E) \quad (1)$$

$$\Delta G(\text{sol}) = \Sigma G(\text{sol}) \text{ for products} - \Sigma G(\text{sol}) \text{ for reactants} \quad (2)$$

**Table S3.** Calculated electronic energies at the B3LYP/6-31G(d,p)/PCM level of theory.

| Structure  | Electronic energies (Hartree/Particle) | Total Gibbs free energies (Hartree/Particle) |
|------------|----------------------------------------|----------------------------------------------|
| 3a_I       | -1235.713230                           | -1235.455069                                 |
| 3a_II      | -1235.715730                           | -1235.458292                                 |
| 3a_III     | -1235.726713                           | -1235.469812                                 |
| 3a_IV      | -1235.714441                           | -1235.457292                                 |
| Indole_I   | -1122.364858                           | -1122.115135                                 |
| Indole_II  | -1122.340011                           | -1122.087335                                 |
| Indole_III | -1122.352327                           | -1122.102334                                 |
| Indole_IV  | -1122.342953                           | -1122.092905                                 |
| Int A      | -1235.079911                           | -1234.837614                                 |
| TS1        | -1235.04095                            | -1234.801510                                 |
| Int B      | -1235.041865                           | -1234.800026                                 |
| TS2        | -1235.033091                           | -1234.792529                                 |
| Int C      | -1235.084848                           | -1234.842534                                 |

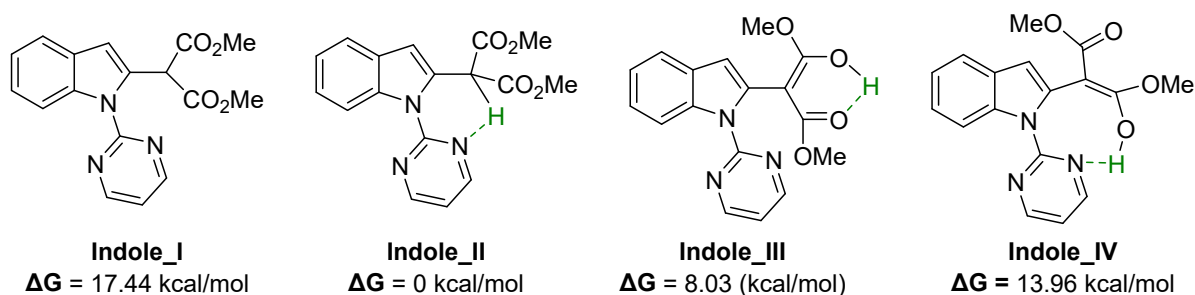

**Figure S6.** Calculated relative Gibbs free energies for tautomers of alkylated indole

## Cartesian coordinates of the optimized structures

### 3a\_I

Charge=0, Multiplicity=1

|   |             |             |             |
|---|-------------|-------------|-------------|
| C | -4.13363011 | 3.88516363  | 1.56432415  |
| C | -3.53103912 | 2.73970614  | 1.02026871  |
| C | -4.29780479 | 1.70895427  | 0.49988553  |
| C | -5.70326268 | 1.80448670  | 0.51564398  |
| C | -6.31579942 | 2.95212551  | 1.06127135  |
| C | -5.51434904 | 3.98117803  | 1.58079397  |
| N | -6.49668162 | 0.77244773  | -0.00849801 |
| C | -7.87484016 | 0.85479266  | 0.02907863  |
| C | -8.50199563 | 1.94843707  | 0.54432637  |
| C | -7.78886997 | 3.09062221  | 1.08774343  |
| O | -8.35830914 | 4.09075632  | 1.53295668  |
| C | -5.83558641 | -0.29094708 | -0.71512404 |
| N | -5.63672287 | -0.06540282 | -2.01536937 |
| C | -5.07734626 | -1.07184670 | -2.69934034 |
| C | -4.71501104 | -2.26781160 | -2.08613775 |
| C | -4.93001344 | -2.35553794 | -0.71183610 |
| N | -5.48428987 | -1.35947693 | -0.01030120 |
| C | -8.72631016 | -0.31709733 | -0.44535827 |
| H | -9.72743118 | 0.10108198  | -0.59057291 |
| C | -8.36603253 | -0.99610371 | -1.78472257 |
| O | -8.06568804 | -2.16771325 | -1.84726177 |
| O | -8.49390578 | -0.29135040 | -2.92125314 |
| C | -8.59034405 | 1.14462011  | -2.94283760 |

|   |              |             |             |
|---|--------------|-------------|-------------|
| C | -8.81929237  | -1.38173524 | 0.67652434  |
| O | -8.03697816  | -1.42033005 | 1.58882600  |
| O | -9.86483232  | -2.23794751 | 0.66256762  |
| C | -10.80766176 | -2.33960034 | -0.41054044 |
| H | -3.52028077  | 4.68399073  | 1.96878243  |
| H | -2.44885400  | 2.65053258  | 1.00652057  |
| H | -3.81244258  | 0.82916964  | 0.09600857  |
| H | -6.02918924  | 4.84421773  | 1.98975474  |
| H | -9.58477224  | 1.98601195  | 0.57758337  |
| H | -4.92747847  | -0.90884203 | -3.76343538 |
| H | -4.28045729  | -3.08634797 | -2.64799873 |
| H | -4.65357746  | -3.24401046 | -0.14962565 |
| H | -8.80945920  | 1.39824978  | -3.98006940 |
| H | -9.39339952  | 1.51572687  | -2.30113235 |
| H | -7.63582789  | 1.58273090  | -2.64417268 |
| H | -11.59986926 | -2.98896095 | -0.03687858 |
| H | -11.24950703 | -1.37045567 | -0.66959590 |
| H | -10.34657782 | -2.78888339 | -1.29199963 |

### 3a\_II

Charge=0, Multiplicity=1

|   |             |            |            |
|---|-------------|------------|------------|
| C | -4.14757074 | 4.05685705 | 1.23063735 |
| C | -3.47832425 | 2.85768959 | 0.94014523 |
| C | -4.17964453 | 1.72245083 | 0.56576351 |
| C | -5.58377837 | 1.76285131 | 0.46228981 |
| C | -6.26137110 | 2.95588388 | 0.77984257 |
| C | -5.52855608 | 4.09368698 | 1.15541196 |
| N | -6.31415336 | 0.60496324 | 0.11184647 |

|   |              |             |             |
|---|--------------|-------------|-------------|
| C | -7.71027730  | 0.61560793  | 0.18679900  |
| C | -8.39160047  | 1.75003573  | 0.48765204  |
| C | -7.73929479  | 3.02231493  | 0.75801407  |
| O | -8.36374543  | 4.05787239  | 0.99260205  |
| C | -5.63874036  | -0.43274870 | -0.60644306 |
| N | -4.96871139  | -0.05114307 | -1.69533804 |
| C | -4.38280831  | -1.02272643 | -2.39590880 |
| C | -4.46813518  | -2.36685659 | -2.02685237 |
| C | -5.17283615  | -2.63978715 | -0.86098433 |
| N | -5.74886850  | -1.67509671 | -0.12777782 |
| C | -8.44096879  | -0.70136721 | -0.03321446 |
| H | -7.87550819  | -1.48087963 | 0.48257061  |
| C | -9.86168784  | -0.65471177 | 0.54201832  |
| O | -10.83992522 | -0.54890418 | -0.15891816 |
| O | -10.01254892 | -0.76836281 | 1.87798169  |
| C | -8.89523735  | -0.88290928 | 2.77281981  |
| C | -8.46683064  | -1.07818848 | -1.52835498 |
| O | -8.07110475  | -0.33110777 | -2.38733324 |
| O | -8.84350689  | -2.33072124 | -1.86549279 |
| C | -9.43284746  | -3.25297082 | -0.94035386 |
| H | -3.58644272  | 4.93941187  | 1.52065449  |
| H | -2.39610824  | 2.80775359  | 1.01493754  |
| H | -3.64058212  | 0.80700525  | 0.35717697  |
| H | -6.09693541  | 4.98857348  | 1.38593702  |
| H | -9.47394654  | 1.74048879  | 0.52492514  |
| H | -3.83871760  | -0.71402521 | -3.28554457 |
| H | -4.00636630  | -3.15205857 | -2.61354815 |

|   |              |             |             |
|---|--------------|-------------|-------------|
| H | -5.27687163  | -3.65493320 | -0.48521080 |
| H | -9.33089443  | -0.92698350 | 3.77083581  |
| H | -8.32492282  | -1.79981875 | 2.58967662  |
| H | -8.23668405  | -0.01444427 | 2.69826570  |
| H | -9.43451273  | -4.21574612 | -1.45239108 |
| H | -8.84635677  | -3.34736629 | -0.01933570 |
| H | -10.45679650 | -2.95878897 | -0.70230124 |

### 3a\_III

Charge=0, Multiplicity=1

|   |             |             |             |
|---|-------------|-------------|-------------|
| C | -9.26218357 | 2.30599645  | 0.44477972  |
| C | -9.18858030 | 0.94998460  | 0.09107617  |
| C | -7.96546525 | 0.32548704  | -0.09767280 |
| C | -6.76941005 | 1.05536544  | 0.05924829  |
| C | -6.83666673 | 2.41635153  | 0.43113215  |
| C | -8.09024303 | 3.02226524  | 0.61337185  |
| N | -5.51076778 | 0.45266802  | -0.10196091 |
| C | -4.33723401 | 1.18610468  | 0.07951169  |
| C | -4.37316152 | 2.49704961  | 0.43547971  |
| C | -5.61088987 | 3.22119570  | 0.65389481  |
| O | -5.65241790 | 4.41081775  | 0.98233618  |
| C | -5.40849317 | -0.94036618 | -0.39689254 |
| N | -5.85759966 | -1.33577070 | -1.59075630 |
| C | -5.72071960 | -2.63948110 | -1.86476070 |
| C | -5.12545755 | -3.53140952 | -0.97593255 |
| C | -4.70992417 | -3.00026743 | 0.24433902  |

|   |              |             |             |
|---|--------------|-------------|-------------|
| N | -4.85979179  | -1.70756045 | 0.55039364  |
| C | -3.06058919  | 0.47965491  | -0.17846405 |
| C | -2.18394796  | 0.05572783  | 0.88331917  |
| C | -2.69480437  | 0.10963787  | -1.46260549 |
| O | -1.61074291  | -0.57899964 | -1.74233006 |
| O | -1.13569052  | -0.60163389 | 0.69527667  |
| O | -3.47881320  | 0.44376544  | -2.48008438 |
| C | -3.17844970  | -0.10423077 | -3.77472125 |
| O | -2.57421762  | 0.40793301  | 2.11171779  |
| C | -1.74032267  | -0.04205620 | 3.19200227  |
| H | -10.22692359 | 2.78231084  | 0.58844923  |
| H | -10.09922328 | 0.37204993  | -0.03763776 |
| H | -7.93873778  | -0.71906681 | -0.37727537 |
| H | -8.08826364  | 4.06951827  | 0.89717807  |
| H | -3.44234464  | 3.03945909  | 0.54284035  |
| H | -6.09442373  | -2.96925158 | -2.83190802 |
| H | -5.00195812  | -4.58135053 | -1.21494111 |
| H | -4.25037069  | -3.62566975 | 1.00649166  |
| H | -3.95398683  | 0.28557863  | -4.43208591 |
| H | -2.18987435  | 0.21446088  | -4.11272036 |
| H | -3.21857723  | -1.19649391 | -3.74636760 |
| H | -2.21060938  | 0.34091278  | 4.09693985  |
| H | -1.69602151  | -1.13399578 | 3.21381044  |
| H | -0.72621103  | 0.35171031  | 3.08787486  |
| H | -1.17230431  | -0.74130125 | -0.82634697 |

**3a\_IV**

Charge=0, Multiplicity=1

|   |             |             |             |
|---|-------------|-------------|-------------|
| C | -9.53624288 | 1.86131059  | 0.80542718  |
| C | -9.35155367 | 0.51576627  | 0.45659014  |
| C | -8.08240496 | -0.00272814 | 0.24456412  |
| C | -6.95143962 | 0.82715811  | 0.37589055  |
| C | -7.13083271 | 2.18133971  | 0.73352789  |
| C | -8.42751610 | 2.67849376  | 0.93971222  |
| N | -5.63748954 | 0.33965639  | 0.19630878  |
| C | -4.53363591 | 1.20102948  | 0.26388893  |
| C | -4.68723715 | 2.50529296  | 0.60851114  |
| C | -5.97808755 | 3.09733367  | 0.91381093  |
| O | -6.11670256 | 4.27193666  | 1.26391946  |
| C | -5.37758096 | -1.05239766 | 0.19760380  |
| N | -5.89000282 | -1.79712330 | -0.78130522 |
| C | -5.61471301 | -3.10619862 | -0.73734765 |
| C | -4.81943578 | -3.67459661 | 0.25549819  |
| C | -4.33597999 | -2.80547230 | 1.22922809  |
| N | -4.62747478 | -1.50062958 | 1.21909505  |
| C | -3.20448396 | 0.67794466  | -0.16530993 |
| C | -2.26757797 | 0.35884949  | 0.78779429  |
| O | -2.58310751 | 0.12393636  | 2.06678465  |
| H | -3.48667630 | -0.27990312 | 2.06846287  |
| C | -2.91155922 | 0.58640210  | -1.60111628 |
| O | -1.87963474 | 0.20808821  | -2.12375906 |
| O | -4.01068015 | 0.94914905  | -2.32592271 |
| C | -3.85967170 | 0.84406647  | -3.74565461 |
| O | -0.97691510 | 0.25667624  | 0.49992756  |



|   |              |             |             |
|---|--------------|-------------|-------------|
| C | -0.10379347  | -0.34011386 | 1.47234743  |
| H | -10.53532450 | 2.25367713  | 0.96662109  |
| H | -10.21084518 | -0.13870329 | 0.34222637  |
| H | -7.97113385  | -1.03629861 | -0.05055561 |
| H | -8.51038082  | 3.72516205  | 1.21320458  |
| H | -3.82105202  | 3.15498986  | 0.60881858  |
| H | -6.03854822  | -3.71153737 | -1.53529456 |
| H | -4.58992551  | -4.73323956 | 0.27011594  |
| H | -3.70633478  | -3.15249207 | 2.04470440  |
| H | -4.81214529  | 1.16608247  | -4.16733155 |
| H | -3.04703850  | 1.48451139  | -4.09985496 |
| H | -3.64038909  | -0.18677620 | -4.03925000 |
| H | 0.86395138   | -0.40724152 | 0.97649296  |
| H | -0.02977869  | 0.28250644  | 2.36725867  |
| H | -0.45293912  | -1.33680726 | 1.75636641  |

### **Indole\_I**

Charge=0, Multiplicity=1

|   |             |            |             |
|---|-------------|------------|-------------|
| C | -6.36131062 | 5.01746576 | -0.60794264 |
| C | -5.27595690 | 4.22993430 | -1.02813850 |
| C | -5.30146310 | 2.83931820 | -0.94822981 |
| C | -6.45448535 | 2.23933565 | -0.42958150 |
| C | -7.55234409 | 3.02356434 | 0.00206458  |
| C | -7.50386505 | 4.42060000 | -0.09103070 |
| N | -6.78504793 | 0.88329387 | -0.19398283 |
| C | -8.08345379 | 0.84610175 | 0.36402738  |
| C | -8.55365079 | 2.11850565 | 0.48222075  |

|   |              |             |             |
|---|--------------|-------------|-------------|
| C | -5.93034359  | -0.20396263 | -0.37140634 |
| N | -6.24503683  | -1.33951020 | 0.26795702  |
| C | -5.39117447  | -2.35488185 | 0.14462531  |
| C | -4.22747343  | -2.27005292 | -0.61517199 |
| C | -4.01385514  | -1.05117368 | -1.25436831 |
| N | -4.85119800  | -0.01903226 | -1.14353590 |
| C | -8.90879101  | -0.37525382 | 0.65994859  |
| H | -9.81713371  | 0.03668322  | 1.11018123  |
| C | -9.31748063  | -1.07850542 | -0.63915323 |
| O | -8.61027853  | -1.14035408 | -1.61517495 |
| O | -10.55326869 | -1.64420485 | -0.69651458 |
| C | -11.47279761 | -1.59085296 | 0.40350926  |
| C | -8.34850147  | -1.21591416 | 1.84513394  |
| O | -7.94567365  | -0.63407369 | 2.81837364  |
| O | -8.51295928  | -2.56178821 | 1.91234932  |
| C | -8.57667455  | -3.45726633 | 0.78997292  |
| H | -6.30406444  | 6.09873202  | -0.68969788 |
| H | -4.39179331  | 4.71306865  | -1.43331403 |
| H | -4.47093881  | 2.24097195  | -1.28881083 |
| H | -8.34766236  | 5.01832800  | 0.24075516  |
| H | -9.53007770  | 2.38374245  | 0.86367363  |
| H | -5.65266979  | -3.26463425 | 0.68058007  |
| H | -3.53620516  | -3.09893838 | -0.70537826 |
| H | -3.14059193  | -0.89083850 | -1.88361278 |
| H | -12.31019811 | -2.22539414 | 0.11153347  |
| H | -11.03202434 | -1.97995736 | 1.32665929  |
| H | -11.84079001 | -0.57233421 | 0.56660238  |

|   |             |             |             |
|---|-------------|-------------|-------------|
| H | -8.12380392 | -4.38875010 | 1.13575529  |
| H | -9.61145209 | -3.65202054 | 0.50069810  |
| H | -8.02233080 | -3.07795111 | -0.06627624 |

## Indole\_II

Charge=0, Multiplicity=1

|   |             |             |             |
|---|-------------|-------------|-------------|
| C | -9.29257803 | 1.89609206  | -0.71866238 |
| C | -9.47376837 | 0.52585850  | -0.46602163 |
| C | -8.39561666 | -0.35294468 | -0.37842125 |
| C | -7.11270808 | 0.17673423  | -0.55004357 |
| C | -6.91551218 | 1.55684297  | -0.79882456 |
| C | -8.01611641 | 2.41915743  | -0.88614195 |
| N | -5.83415821 | -0.42574703 | -0.49548248 |
| C | -4.86431079 | 0.58633787  | -0.72805028 |
| C | -5.50214161 | 1.77485582  | -0.91012518 |
| C | -5.56874164 | -1.75402911 | -0.15803655 |
| N | -6.57230613 | -2.63761225 | -0.26896155 |
| C | -6.28686464 | -3.89794383 | 0.06545672  |
| C | -5.02142167 | -4.30615190 | 0.48393953  |
| C | -4.05557046 | -3.30441389 | 0.55437690  |
| N | -4.32395850 | -2.03471231 | 0.25327916  |
| C | -3.38884013 | 0.31051992  | -0.84097853 |
| H | -3.21229743 | -0.59064151 | -1.42755338 |
| C | -2.69099977 | 1.42669934  | -1.62387323 |
| O | -2.37239637 | 1.35132028  | -2.78646108 |
| O | -2.47312752 | 2.50987531  | -0.84768649 |
| C | -1.80015607 | 3.60313281  | -1.50087315 |

|   |              |             |             |
|---|--------------|-------------|-------------|
| C | -2.65727381  | 0.08327110  | 0.48729950  |
| O | -1.57109126  | -0.44639093 | 0.56045252  |
| O | -3.33212535  | 0.58512855  | 1.53366851  |
| C | -2.70063979  | 0.39267755  | 2.80863280  |
| H | -10.15801493 | 2.54870467  | -0.78451962 |
| H | -10.47898003 | 0.13429923  | -0.34129633 |
| H | -8.54097049  | -1.40777094 | -0.20180104 |
| H | -7.86525448  | 3.47723185  | -1.07868028 |
| H | -5.01081652  | 2.71536467  | -1.10707123 |
| H | -7.10709970  | -4.60854461 | -0.01605965 |
| H | -4.80427717  | -5.33618179 | 0.73930190  |
| H | -3.03434473  | -3.50976936 | 0.86872406  |
| H | -1.69867326  | 4.37947819  | -0.74332943 |
| H | -0.81974396  | 3.28435033  | -1.86292962 |
| H | -2.38940421  | 3.96322499  | -2.34811352 |
| H | -3.35850576  | 0.86507961  | 3.53772756  |
| H | -2.59387161  | -0.67460311 | 3.02195431  |
| H | -1.71073624  | 0.85582041  | 2.82278406  |

### Indole\_III

Charge=0, Multiplicity=1

|   |             |            |             |
|---|-------------|------------|-------------|
| C | -4.51901590 | 4.10899327 | -1.94005935 |
| C | -3.46318538 | 3.27775642 | -1.52645831 |
| C | -3.69826233 | 2.04322531 | -0.92461372 |
| C | -5.02799938 | 1.65076378 | -0.74686722 |
| C | -6.10394463 | 2.47456586 | -1.16527330 |
| C | -5.83989836 | 3.71492639 | -1.76343933 |

|   |              |             |             |
|---|--------------|-------------|-------------|
| N | -5.58431776  | 0.46856394  | -0.22232195 |
| C | -6.99941345  | 0.58129617  | -0.27654181 |
| C | -7.31668654  | 1.78370969  | -0.84146264 |
| C | -4.86142330  | -0.64884550 | 0.20346078  |
| N | -5.44188521  | -1.84956229 | 0.04631637  |
| C | -4.76285683  | -2.89891037 | 0.50971652  |
| C | -3.49851927  | -2.78601807 | 1.08715471  |
| C | -2.97445358  | -1.49657372 | 1.14575558  |
| N | -3.64566246  | -0.42265940 | 0.72431226  |
| C | -7.92425796  | -0.42162457 | 0.26095153  |
| C | -8.95108915  | -0.94911158 | -0.50956314 |
| C | -7.81118151  | -0.95174556 | 1.59586690  |
| O | -9.79597842  | -1.85769471 | -0.06933608 |
| O | -8.54747455  | -1.84290568 | 2.07269311  |
| H | -9.47997382  | -2.06412774 | 0.88409137  |
| O | -9.12919418  | -0.53826811 | -1.76192137 |
| C | -10.17523637 | -1.16143556 | -2.52675916 |
| O | -6.82362209  | -0.41090526 | 2.32949291  |
| C | -6.61365498  | -0.98598557 | 3.62756362  |
| H | -4.29756309  | 5.06748893  | -2.40036325 |
| H | -2.43764476  | 3.60493383  | -1.67057831 |
| H | -2.88479716  | 1.41735676  | -0.58672306 |
| H | -6.66020464  | 4.35049921  | -2.08434117 |
| H | -8.32540326  | 2.14255224  | -0.98410689 |
| H | -5.24580521  | -3.86806849 | 0.39665958  |
| H | -2.95150356  | -3.64768209 | 1.45098952  |
| H | -1.98346307  | -1.30969252 | 1.55567979  |

|   |              |             |             |
|---|--------------|-------------|-------------|
| H | -10.12795618 | -0.68860626 | -3.50713756 |
| H | -10.00529580 | -2.23754757 | -2.61439998 |
| H | -11.15121617 | -0.98848733 | -2.06626991 |
| H | -5.78406455  | -0.42640881 | 4.05883195  |
| H | -7.50906983  | -0.88916947 | 4.24619201  |
| H | -6.35654305  | -2.04519559 | 3.53940893  |

### Indole\_IV

Charge=0, Multiplicity=1

|   |             |             |             |
|---|-------------|-------------|-------------|
| C | -9.39936668 | 2.15772953  | -1.01813720 |
| C | -9.60392581 | 0.92324351  | -0.37696673 |
| C | -8.53531385 | 0.11317748  | 0.00227122  |
| C | -7.24739998 | 0.57628682  | -0.27430204 |
| C | -7.02145458 | 1.81129786  | -0.92956780 |
| C | -8.11425968 | 2.60771413  | -1.29890567 |
| N | -5.98718183 | -0.01511229 | -0.05821613 |
| C | -4.97738041 | 0.87101123  | -0.54452594 |
| C | -5.60078496 | 1.96276907  | -1.07245616 |
| C | -5.78252644 | -1.32435652 | 0.34078719  |
| N | -6.60349457 | -1.84060051 | 1.26739022  |
| C | -6.36731160 | -3.09970802 | 1.63614085  |
| C | -5.30889354 | -3.85623109 | 1.12887060  |
| C | -4.53349140 | -3.23846037 | 0.15519828  |
| N | -4.77798623 | -1.99186909 | -0.26137174 |
| C | -3.52790925 | 0.74638923  | -0.26744789 |
| C | -2.71049008 | 0.06765740  | -1.14504746 |
| C | -2.96742642 | 1.45552056  | 0.89223321  |

|   |              |             |             |
|---|--------------|-------------|-------------|
| O | -3.17554046  | -0.81243640 | -2.03021803 |
| O | -1.79584158  | 1.53986176  | 1.21471519  |
| H | -3.93224601  | -1.28099744 | -1.56428062 |
| O | -1.39389431  | 0.25103140  | -1.16387809 |
| C | -0.59400445  | -0.66288387 | -1.92779503 |
| O | -3.96570933  | 2.00941327  | 1.64760554  |
| C | -3.51618827  | 2.69304804  | 2.82077568  |
| H | -10.25628563 | 2.76498065  | -1.29420963 |
| H | -10.61616209 | 0.59432436  | -0.16146088 |
| H | -8.69267206  | -0.82463235 | 0.51744458  |
| H | -7.95224773  | 3.55818429  | -1.79862602 |
| H | -5.08039297  | 2.82678986  | -1.46013483 |
| H | -7.04709565  | -3.51512086 | 2.37733367  |
| H | -5.11605036  | -4.86972359 | 1.45811541  |
| H | -3.70579060  | -3.75005927 | -0.33003595 |
| H | 0.43671059   | -0.37890079 | -1.71657899 |
| H | -0.77109662  | -1.69715026 | -1.61917017 |
| H | -0.80116695  | -0.57018259 | -2.99703877 |
| H | -4.41689453  | 3.07660540  | 3.30187896  |
| H | -2.98423690  | 2.01283889  | 3.49299650  |
| H | -2.84151092  | 3.51465090  | 2.56241462  |

### Int A

Charge=0, Multiplicity=2

|   |             |            |             |
|---|-------------|------------|-------------|
| C | -1.49348620 | 3.89066221 | -0.34397407 |
| C | -1.30323619 | 2.73784896 | -1.11699979 |
| C | -2.18889512 | 1.67139113 | -1.05365675 |

|   |             |             |             |
|---|-------------|-------------|-------------|
| C | -3.30820015 | 1.72820954  | -0.19905878 |
| C | -3.49753592 | 2.88740742  | 0.58908443  |
| C | -2.58772822 | 3.95322781  | 0.49945646  |
| N | -4.22488454 | 0.65131706  | -0.07126554 |
| C | -5.35305000 | 0.78783057  | 0.75460914  |
| C | -5.54624520 | 1.88785542  | 1.53736859  |
| C | -4.62729230 | 3.01282186  | 1.53577759  |
| O | -4.79006746 | 4.00079172  | 2.25532145  |
| C | -3.95900039 | -0.65005884 | -0.57686644 |
| N | -3.50714035 | -0.78279348 | -1.82571550 |
| C | -3.34482292 | -2.03716649 | -2.26183130 |
| C | -3.66576677 | -3.15167036 | -1.49044183 |
| C | -4.12447816 | -2.89072558 | -0.20019401 |
| N | -4.24440841 | -1.64785865 | 0.26888646  |
| C | -6.38926801 | -0.24978707 | 0.69689158  |
| C | -7.03209454 | -0.68769066 | -0.55215492 |
| O | -7.95642638 | -1.47925031 | -0.61553000 |
| C | -6.91129671 | -0.81455002 | 1.97491154  |
| O | -7.25290951 | -0.14600180 | 2.93018720  |
| O | -6.93872804 | -2.15589278 | 1.94803340  |
| C | -7.48747918 | -2.77540664 | 3.12672246  |
| O | -6.49837875 | -0.07684897 | -1.63711780 |
| C | -7.05966975 | -0.46575191 | -2.89976963 |
| H | -0.79416359 | 4.71826579  | -0.40706569 |
| H | -0.45287614 | 2.66866825  | -1.78924944 |
| H | -2.03489618 | 0.81122684  | -1.68558529 |
| H | -2.78412765 | 4.81543343  | 1.12783795  |



|   |             |             |             |
|---|-------------|-------------|-------------|
| H | -6.43001614 | 1.94824069  | 2.15709659  |
| H | -2.96263620 | -2.14383756 | -3.27472252 |
| H | -3.55854907 | -4.16119608 | -1.86881771 |
| H | -4.39691785 | -3.68892208 | 0.48574592  |
| H | -7.44993781 | -3.84733607 | 2.93584936  |
| H | -6.89438870 | -2.51654004 | 4.00755727  |
| H | -8.51811871 | -2.44823423 | 3.28404618  |
| H | -6.49654631 | 0.08824388  | -3.64981639 |
| H | -6.95018700 | -1.54306535 | -3.05204535 |
| H | -8.12166345 | -0.21105749 | -2.94370491 |

### TS1

Charge=0, Multiplicity=2

|   |             |             |             |
|---|-------------|-------------|-------------|
| C | -2.23174323 | 3.72800360  | 0.34255917  |
| C | -2.80186707 | 2.60187986  | 0.95638706  |
| C | -2.13397895 | 1.38889859  | 0.96622454  |
| C | -0.87840439 | 1.29934142  | 0.34987318  |
| C | -0.28751431 | 2.41878578  | -0.28005845 |
| C | -0.99075395 | 3.63178184  | -0.26554256 |
| C | 1.05469833  | 0.01234456  | -0.30248467 |
| C | 1.68307594  | 1.02000517  | -0.94250579 |
| C | 1.04249170  | 2.33241932  | -0.96171710 |
| O | 1.54813427  | 3.31200078  | -1.50765706 |
| C | 1.25972854  | -1.45107690 | -0.02194846 |
| C | -0.46099729 | -1.25040814 | 0.64367629  |
| N | -0.46822507 | -1.56030437 | 2.00779402  |
| C | -1.03256526 | -2.70055344 | 2.33005584  |
| C | -1.71515733 | -3.50527717 | 1.39515785  |

|   |             |             |             |
|---|-------------|-------------|-------------|
| C | -1.88480300 | -2.97091011 | 0.10181712  |
| N | -1.34070354 | -1.83769832 | -0.27067441 |
| C | 1.34544231  | -2.44336039 | -1.15926249 |
| O | 0.88956025  | -3.55536665 | -1.12828781 |
| O | 2.01935464  | -1.91320654 | -2.18876127 |
| C | 2.18156544  | -2.76800627 | -3.34267876 |
| C | 2.15926617  | -1.83449131 | 1.13649168  |
| O | 2.38388138  | -2.97214946 | 1.46482950  |
| O | 2.63514037  | -0.74838313 | 1.75225860  |
| C | 3.41354150  | -0.99067160 | 2.94214912  |
| H | -2.76515442 | 4.67126540  | 0.34479905  |
| H | -3.77381642 | 2.67903422  | 1.43050354  |
| H | -2.56302209 | 0.51674099  | 1.44474176  |
| H | -0.52761912 | 4.48315680  | -0.74978029 |
| H | 2.63307855  | 0.88525284  | -1.43775718 |
| H | -0.98477439 | -2.99081889 | 3.37635426  |
| H | -2.15541509 | -4.45179378 | 1.67903973  |
| H | -2.51388508 | -3.47499632 | -0.62667583 |
| H | 1.20489322  | -3.03676662 | -3.74723252 |
| H | 2.74796369  | -2.17828492 | -4.05905922 |
| H | 2.72281021  | -3.67405498 | -3.06699515 |
| H | 3.72222691  | -0.00721978 | 3.28765063  |
| H | 2.79783674  | -1.48996146 | 3.69179848  |
| H | 4.27947256  | -1.61179458 | 2.70926246  |
| N | -0.14436184 | 0.13284248  | 0.32775580  |

**Int B**

Charge=0, Multiplicity=2

|   |             |             |             |
|---|-------------|-------------|-------------|
| C | -9.54828584 | 1.57180315  | -1.94534451 |
| C | -9.70932242 | 0.43901746  | -1.12975059 |
| C | -8.61782417 | -0.14141058 | -0.49983606 |
| C | -7.34875833 | 0.42649352  | -0.68380893 |
| C | -7.16308125 | 1.57251989  | -1.49406308 |
| C | -8.28846309 | 2.12652193  | -2.12209093 |
| N | -6.20620358 | -0.09734753 | -0.11797507 |
| C | -4.97857145 | 0.49429077  | -0.21144161 |
| C | -4.71060144 | 1.59637391  | -0.94288493 |
| C | -5.81873317 | 2.21235474  | -1.67792035 |
| O | -5.67654293 | 3.20816717  | -2.39093811 |
| C | -5.90858535 | -0.98301525 | 1.01539384  |
| N | -6.05356352 | -2.37432305 | 0.70122277  |
| C | -6.31721068 | -3.16633633 | 1.70535522  |
| C | -6.59027837 | -2.69612960 | 3.01762677  |
| C | -6.69764483 | -1.29167651 | 3.18533589  |
| N | -6.43116900 | -0.43853100 | 2.23393467  |
| C | -4.34464892 | -0.46560130 | 0.77362059  |
| C | -3.63144185 | 0.08511163  | 1.99921056  |
| O | -3.71423848 | -0.36689302 | 3.11461257  |
| O | -2.84629688 | 1.11257092  | 1.63567397  |
| C | -2.06002552 | 1.69007434  | 2.69856343  |
| C | -3.49573651 | -1.59788146 | 0.18423217  |
| O | -2.86175272 | -2.37247321 | 0.86366187  |
| O | -3.57240679 | -1.62258173 | -1.14941163 |
| C | -2.89398957 | -2.72521154 | -1.78178104 |

|   |              |             |             |
|---|--------------|-------------|-------------|
| H | -10.41158973 | 2.01163874  | -2.43484373 |
| H | -10.69654665 | 0.00816938  | -0.99087199 |
| H | -8.72718341  | -1.02208543 | 0.12471177  |
| H | -8.12914703  | 3.00281265  | -2.74181915 |
| H | -3.72595501  | 2.04094958  | -0.98663616 |
| H | -6.36175428  | -4.23356295 | 1.49010088  |
| H | -6.78840640  | -3.38142079 | 3.83313696  |
| H | -7.04545716  | -0.87928886 | 4.13154354  |
| H | -1.48776820  | 2.49212132  | 2.23472494  |
| H | -2.71396973  | 2.08271231  | 3.48072015  |
| H | -1.39723955  | 0.93663563  | 3.13082738  |
| H | -3.03821086  | -2.57957335 | -2.85125842 |
| H | -1.83177162  | -2.71724845 | -1.52638292 |
| H | -3.33503958  | -3.67024778 | -1.45544984 |

## TS2

Charge=0, Multiplicity=2

|   |             |             |             |
|---|-------------|-------------|-------------|
| C | -2.44644668 | 3.22743807  | 0.37661747  |
| C | -2.71560111 | 2.12553871  | 1.20323143  |
| C | -1.83787016 | 1.05651021  | 1.25610787  |
| C | -0.68670264 | 1.07317596  | 0.44911020  |
| C | -0.41354350 | 2.17067510  | -0.40443826 |
| C | -1.30203463 | 3.24983697  | -0.40993233 |
| C | 1.26519501  | -0.01687187 | -0.39447963 |
| C | 1.62722136  | 0.97944874  | -1.23272667 |
| C | 0.80621991  | 2.18667720  | -1.26917247 |
| O | 1.06920280  | 3.14817793  | -1.98900685 |

|   |             |             |             |
|---|-------------|-------------|-------------|
| C | 1.56451548  | -1.48340061 | -0.18682727 |
| C | 0.14151497  | -1.66631883 | 0.48661273  |
| N | 0.13039590  | -2.20121467 | 1.77488100  |
| C | -1.00465278 | -2.71840975 | 2.17425878  |
| C | -2.14900709 | -2.79911937 | 1.35096087  |
| C | -1.98865533 | -2.40498006 | 0.01295397  |
| N | -0.86670064 | -1.90027006 | -0.45040929 |
| C | 1.79061161  | -2.36240420 | -1.41204700 |
| O | 1.30421575  | -3.44505990 | -1.58144213 |
| O | 2.65833581  | -1.76403827 | -2.24400749 |
| C | 3.03036904  | -2.52536148 | -3.41368045 |
| C | 2.69231009  | -1.78181365 | 0.82019744  |
| O | 3.28876491  | -2.82551247 | 0.85758200  |
| O | 2.90806086  | -0.74315401 | 1.62958044  |
| C | 3.86462971  | -0.96175790 | 2.68737038  |
| H | -3.13274914 | 4.06592480  | 0.35735489  |
| H | -3.61065711 | 2.11583930  | 1.81462915  |
| H | -2.02093259 | 0.20674280  | 1.90209254  |
| H | -1.06852097 | 4.09456573  | -1.04703830 |
| H | 2.46970925  | 0.89061472  | -1.90283491 |
| H | -1.02809506 | -3.11918676 | 3.18525183  |
| H | -3.07939903 | -3.21489449 | 1.71414661  |
| H | -2.79475661 | -2.53486625 | -0.70454171 |
| H | 2.14741838  | -2.74335496 | -4.01582623 |
| H | 3.72535443  | -1.89319438 | -3.96115405 |
| H | 3.50670873  | -3.45987739 | -3.11438264 |
| H | 3.90869495  | -0.02261809 | 3.23352121  |

|   |            |             |            |
|---|------------|-------------|------------|
| H | 3.52279964 | -1.77187146 | 3.33296415 |
| H | 4.83992320 | -1.21517407 | 2.26966473 |
| N | 0.23501786 | 0.05598162  | 0.50221968 |

### Int C

Charge=0, Multiplicity=2

|   |             |             |             |
|---|-------------|-------------|-------------|
| C | -0.95994759 | 3.84628898  | -0.50517995 |
| C | -0.74899594 | 2.82267484  | -1.44598734 |
| C | -1.56863027 | 1.70538013  | -1.46004692 |
| C | -2.62383341 | 1.58706968  | -0.52590772 |
| C | -2.83048004 | 2.62851854  | 0.42017091  |
| C | -1.99514906 | 3.74825728  | 0.42064860  |
| N | -3.40352985 | 0.46172900  | -0.58045324 |
| C | -4.40325134 | 0.32194532  | 0.29030523  |
| C | -4.72179180 | 1.27494995  | 1.26195020  |
| C | -3.94122531 | 2.48935928  | 1.37821170  |
| O | -4.20596589 | 3.35939279  | 2.22980733  |
| C | -6.64468953 | -0.49325154 | -0.42892158 |
| N | -7.72925767 | -0.96215132 | 0.19395820  |
| C | -8.91170646 | -0.57346869 | -0.30114536 |
| C | -9.01345031 | 0.26743856  | -1.40452993 |
| C | -7.81141895 | 0.70955569  | -1.95827980 |
| N | -6.62358822 | 0.34234586  | -1.47296228 |
| C | -5.27503579 | -0.92910275 | 0.10982166  |
| C | -4.60304284 | -1.87671479 | -0.91218423 |
| O | -5.02407719 | -2.13262392 | -2.01292097 |
| O | -3.48254870 | -2.39383260 | -0.37913801 |

|   |             |             |             |
|---|-------------|-------------|-------------|
| C | -2.72312750 | -3.23538680 | -1.26121109 |
| C | -5.48701021 | -1.69227095 | 1.43689465  |
| O | -5.39068344 | -1.21517304 | 2.54380452  |
| O | -5.82108949 | -2.96695176 | 1.19082191  |
| C | -6.16792428 | -3.74487741 | 2.34970073  |
| H | -0.31239446 | 4.71786577  | -0.50247786 |
| H | 0.05996752  | 2.90974169  | -2.16490830 |
| H | -1.43048886 | 0.90171033  | -2.17549405 |
| H | -2.17943441 | 4.52574817  | 1.15486242  |
| H | -5.54661129 | 1.13263950  | 1.94710091  |
| H | -9.79635535 | -0.94904736 | 0.20870395  |
| H | -9.97372112 | 0.57419172  | -1.80334863 |
| H | -7.79822667 | 1.38441545  | -2.81176992 |
| H | -1.86545442 | -3.57295190 | -0.67998093 |
| H | -3.32425800 | -4.08540481 | -1.59396902 |
| H | -2.39639260 | -2.66565502 | -2.13506755 |
| H | -6.39981435 | -4.74091937 | 1.97432323  |
| H | -5.33207548 | -3.77972517 | 3.05255033  |
| H | -7.03700281 | -3.30670959 | 2.84664795  |

## 9. References

- (1) Gaussian-09, Revision C.01, M. J. Frisch, G. W. Trucks, H. B. Schlegel, G. E. Scuseria, M. A. Robb, J. R. Cheeseman, G. Scalmani, V. Barone, B. Mennucci, G. A. Petersson, H. Nakatsuji, M. Caricato, X. Li, H. P. Hratchian, A. F. Izmaylov, J. Bloino, G. Zheng, J. L. Sonnenberg, M. Hada, M. Ehara, K. Toyota, R. Fukuda, J. Hasegawa, M. Ishida, T. Nakajima, Y. Honda, O. Kitao, H. Nakai, T. Vreven, J. A. Montgomery, Jr., J. E. Peralta, F. Ogliaro, M. Bearpark, J. J. Heyd, E. Brothers, K. N. Kudin, V. N. Staroverov, T. Keith, R. Kobayashi, J. Normand, K. Raghavachari, A. Rendell, J. C. Burant, S. S. Iyengar, J. Tomasi, M. Cossi, N. Rega, J. M. Millam, M. Klene, J. E. Knox, J. B. Cross, V. Bakken, C. Adamo, J. Jaramillo, R. Gomperts, R. E. Stratmann, O. Yazyev, A. J. Austin, R. Cammi, C. Pomelli, J. W. Ochterski, R. L. Martin, K. Morokuma, V. G. Zakrzewski, G. A. Voth, P. Salvador, J. J. Dannenberg, S. Dapprich, A. D. Daniels, O. Farkas, J. B. Foresman, J. V. Ortiz, J. Cioslowski, D. J. Fox, Gaussian, Inc., Wallingford CT, 2010.
- (2) R. G. Parr, Y. Weitao, *Density-Functional Theory of Atoms and Molecules*; Oxford University Press, 1989.
- (3) a) A. D. Becke, *J. Chem. Phys.* **1993**, *98*, 5648; b) C. Lee, W. Yang, R. G. Parr, *Phys. Rev. B* **1988**, *37*, 785.
- (4) S. Grimme, J. Antony, S. Ehrlich, H. Krieg, *J. Chem. Phys.* **2010**, *132*, 154104.
- (5) P. C. Hariharan, J. A. Pople, *Theor. Chim. Acta.* **1973**, *28*, 213.
- (6) C. Gonzalez, H. B. Schlegel, *J. Chem. Phys.* **1989**, *90*, 2154.
- (7) C. Gonzalez, H. B. Schlegel, *J. Phys. Chem.* **1990**, *94*, 5523.



(8) J. Tomasi, B. Mennucci, R. Cammi, *Chem. Rev.* **2005**, *105*, 2999.

(9) C. Y. Legault, CYLview, 1.0b, Université de Sherbrooke, 2009  
(<http://www.cylview.org>).

## 10. Copies of $^1\text{H}$ , $^{13}\text{C}$ and $^{19}\text{F}$ NMR Spectra

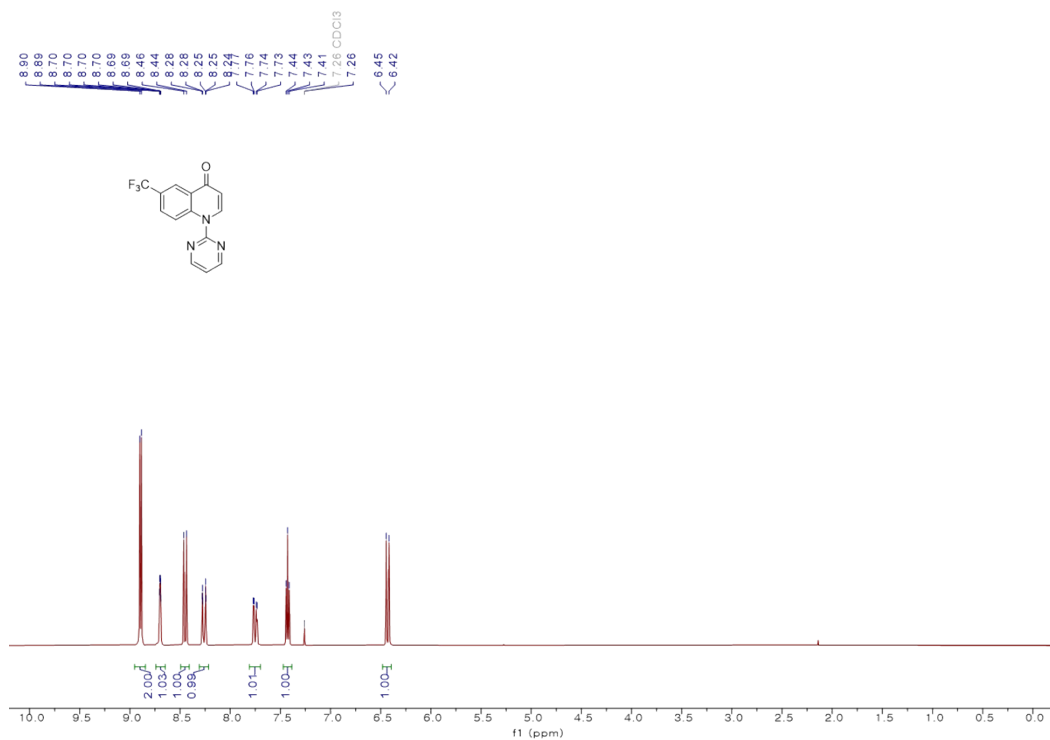

$^1\text{H}$  NMR spectrum of **1e** (300 MHz, Chloroform-*d*)

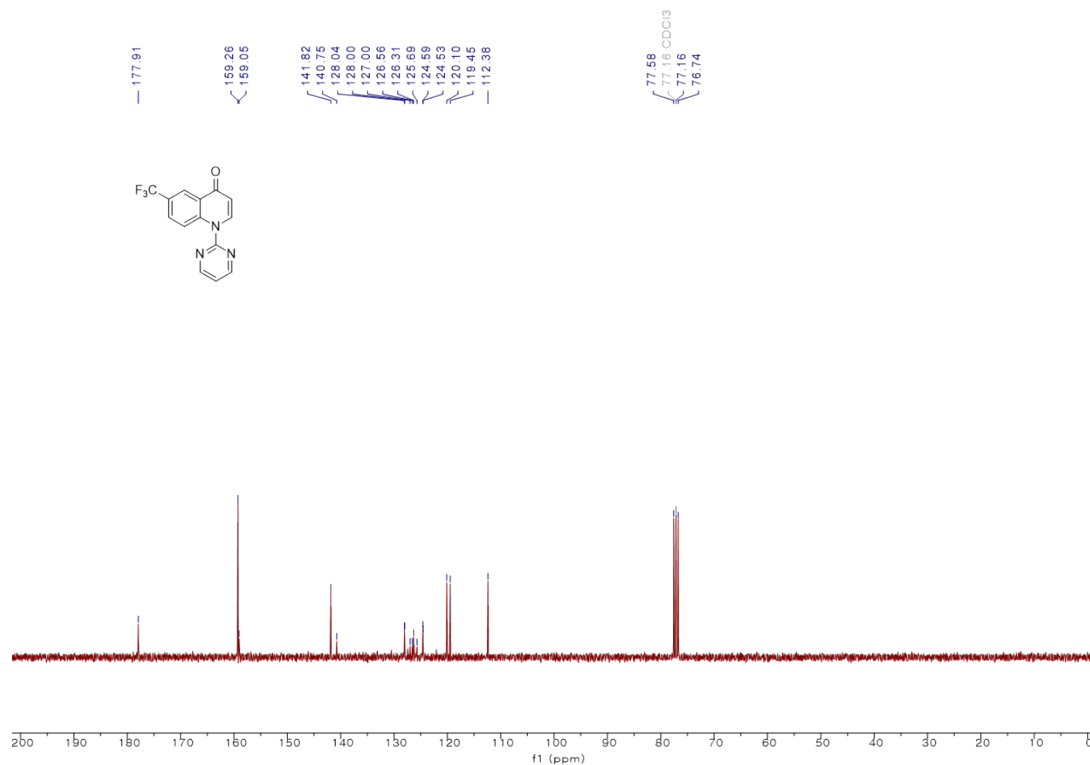

$^{13}\text{C}$  NMR spectrum of **1e** (75 MHz, Chloroform-*d*)

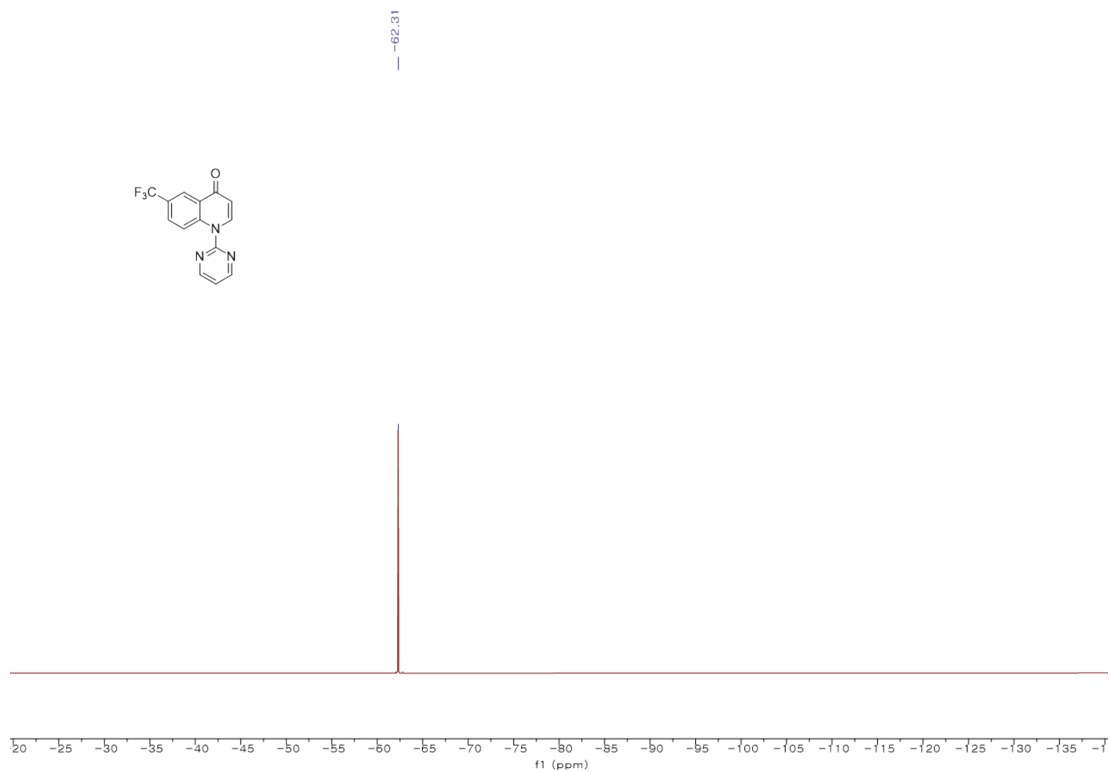

$^{19}\text{F}$  NMR spectrum of **1e** (471 MHz, Chloroform-*d*)

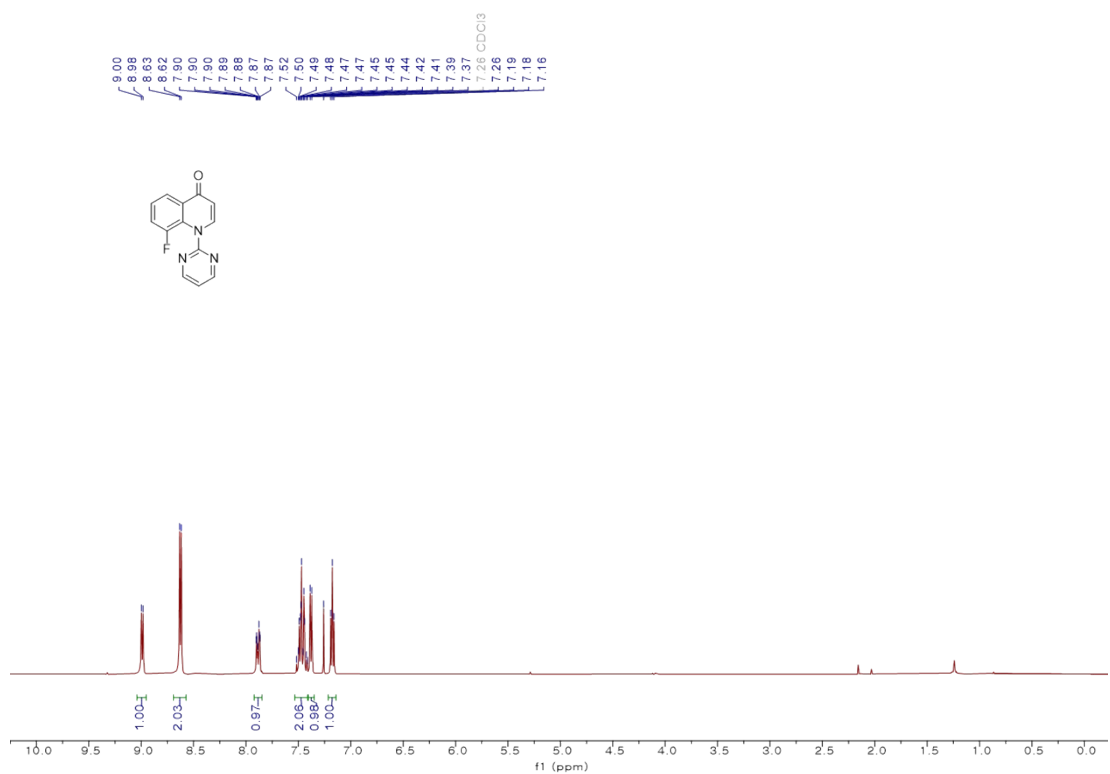

$^1\text{H}$  NMR spectrum of **1i** (300 MHz, Chloroform-*d*)

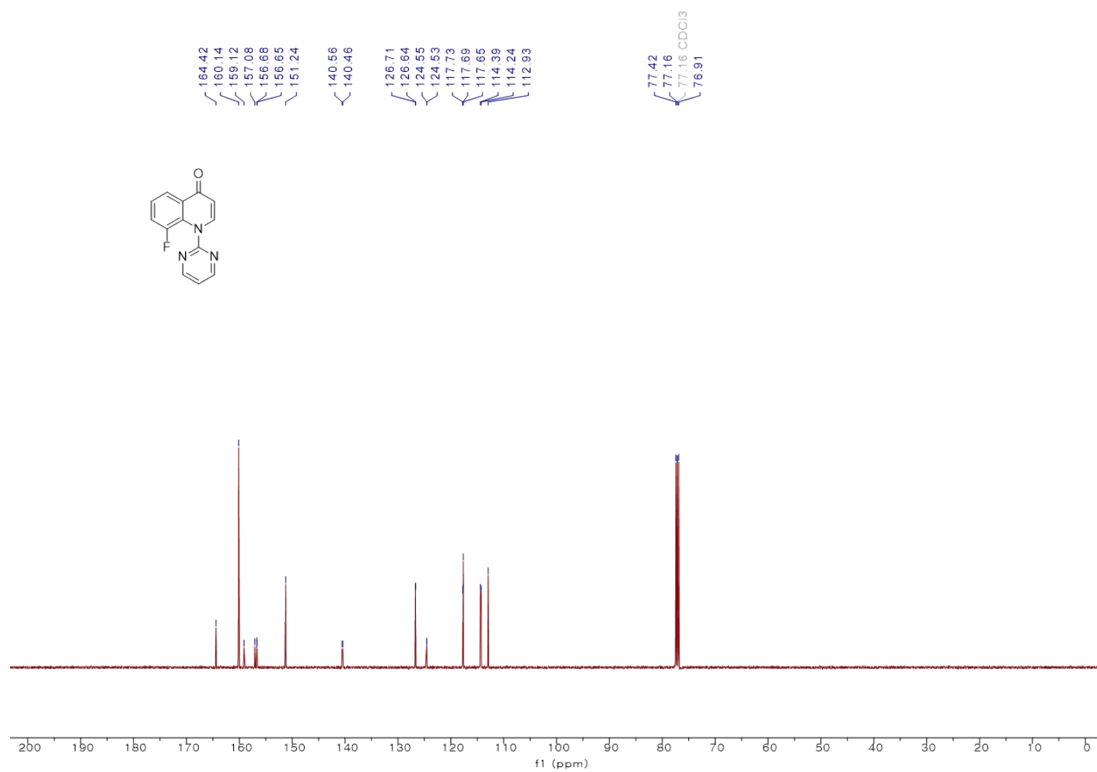

<sup>13</sup>C NMR spectrum of **1i** (75 MHz, Chloroform-*d*)

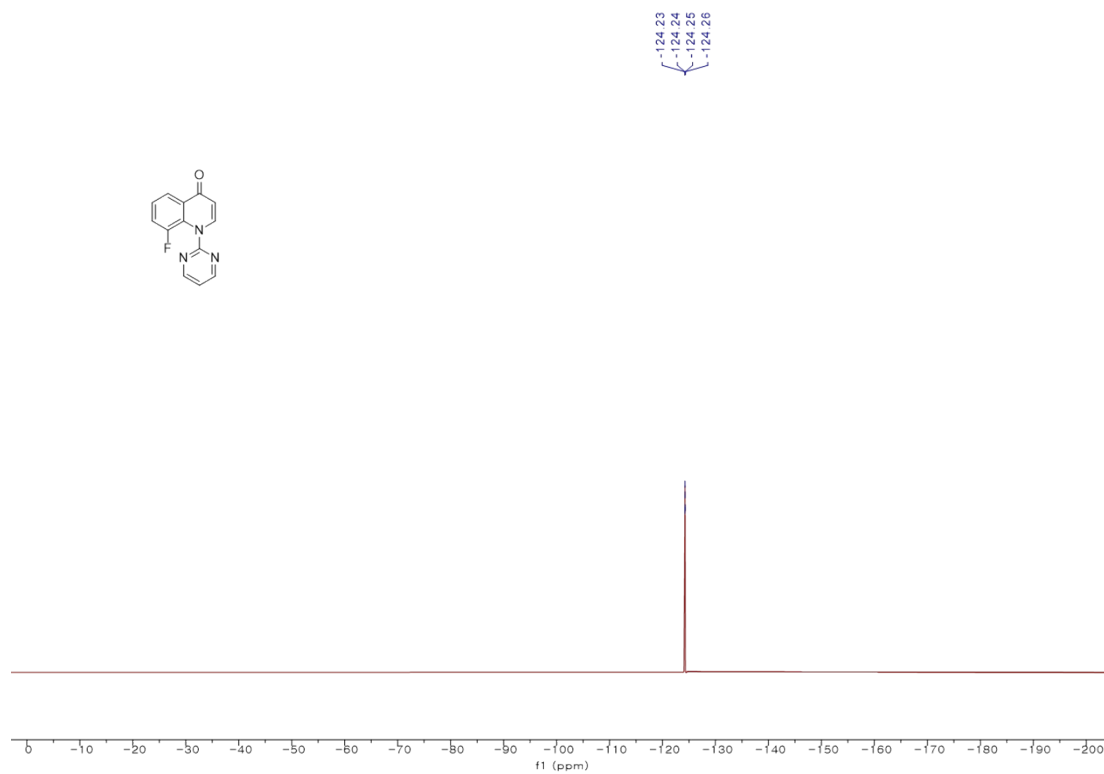

<sup>19</sup>F NMR spectrum of **1i** (471 MHz, Chloroform-*d*)



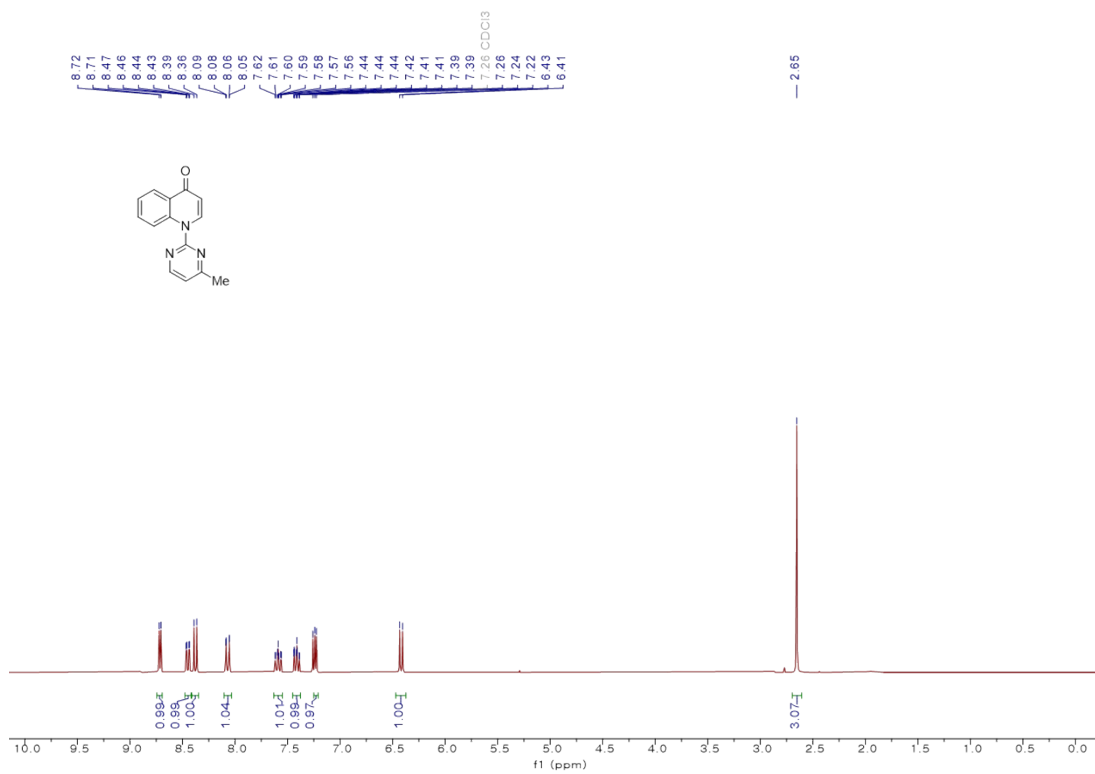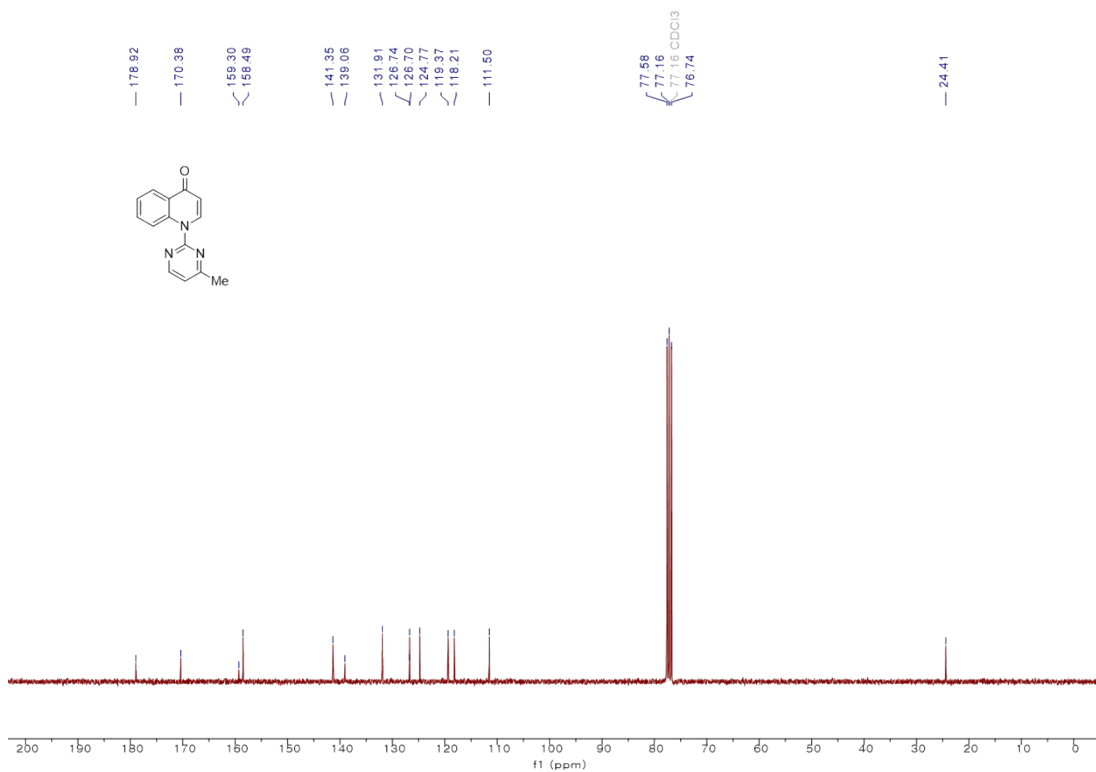

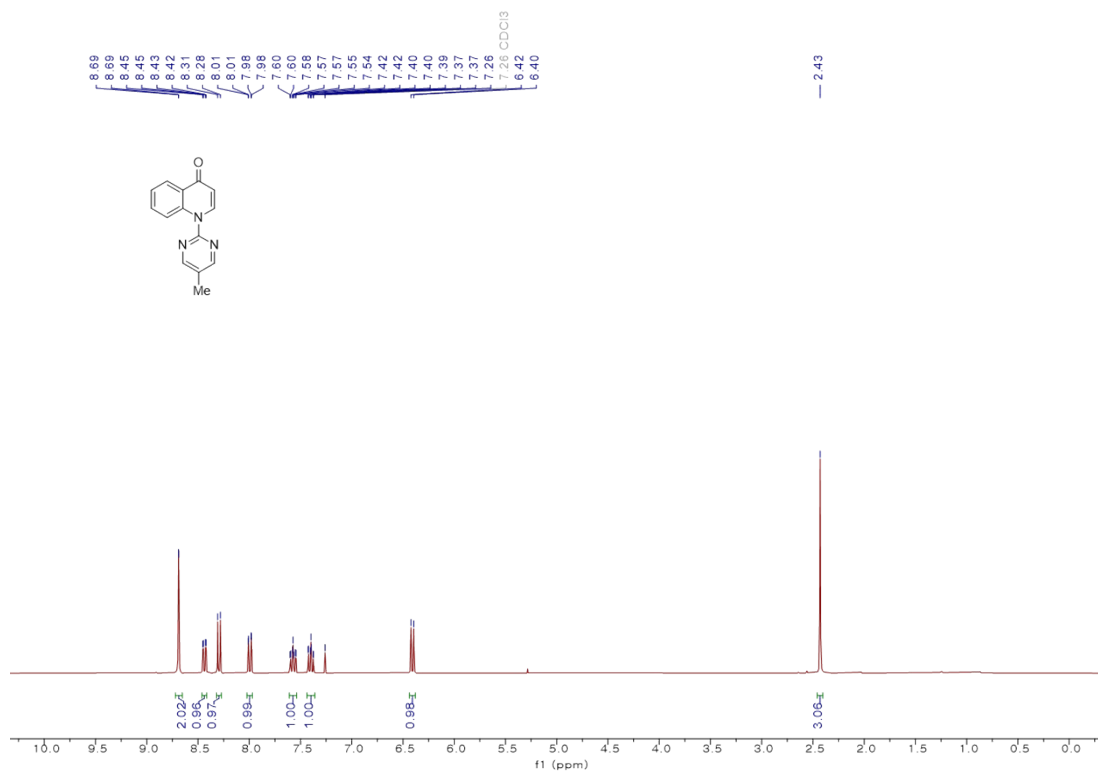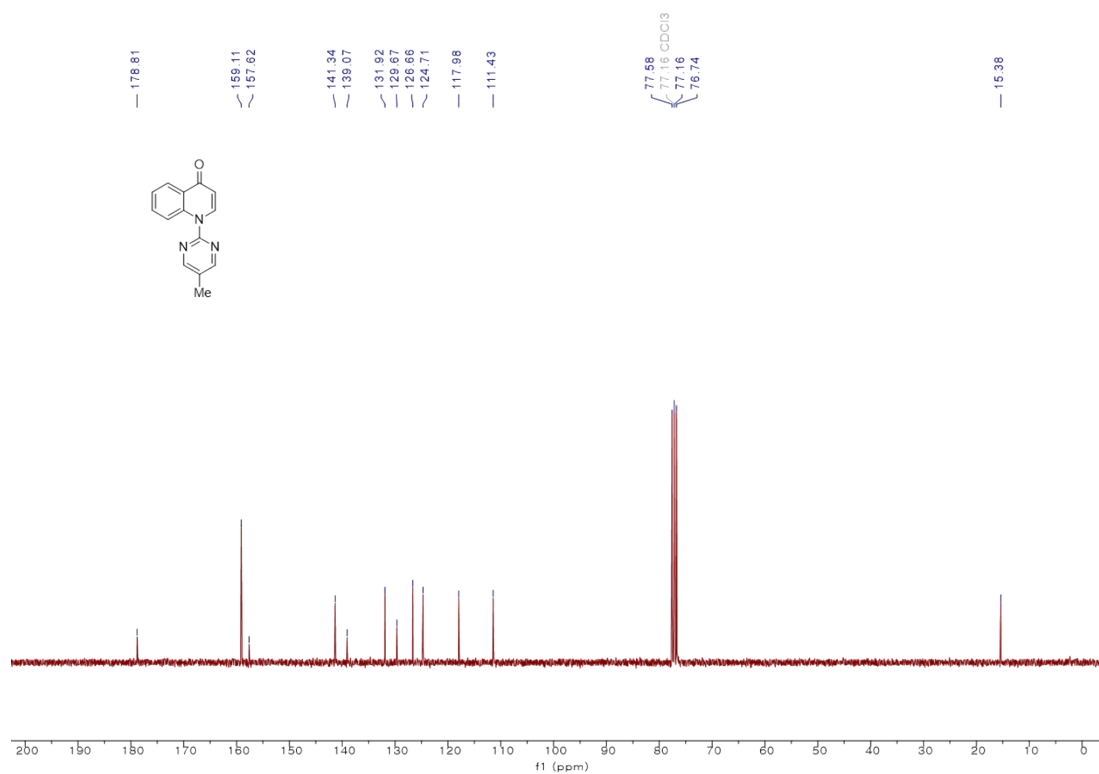

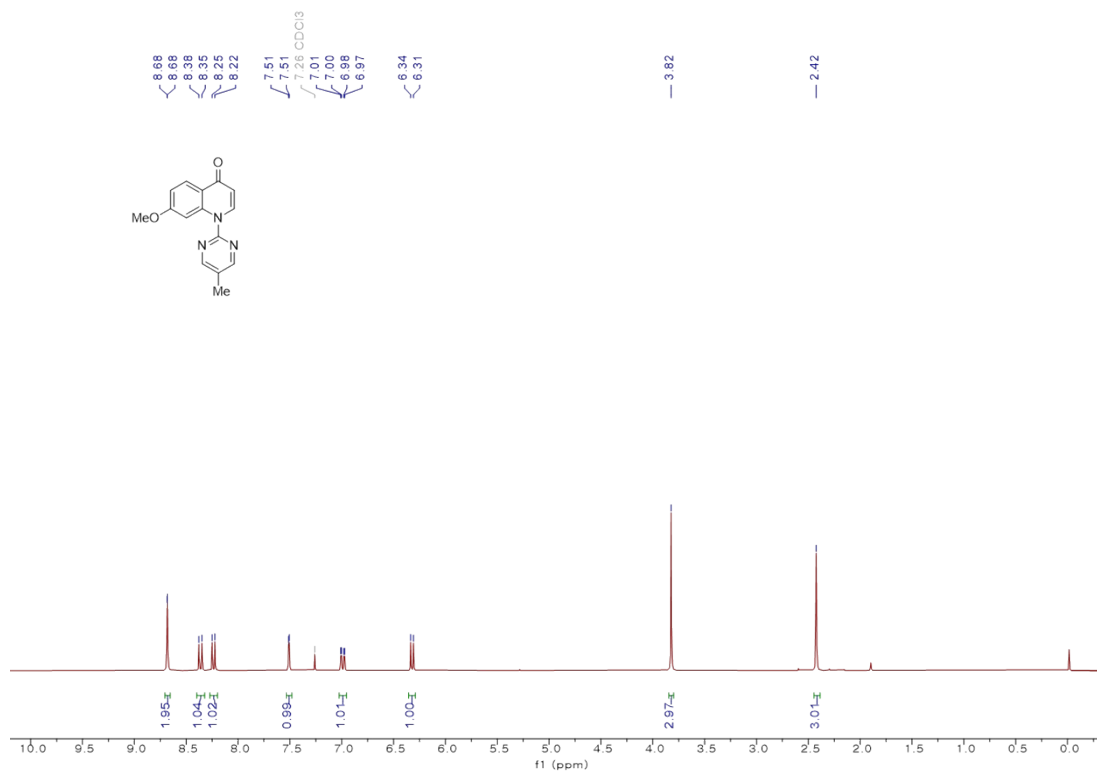

<sup>1</sup>H NMR spectrum of **1t** (300 MHz, Chloroform-*d*)

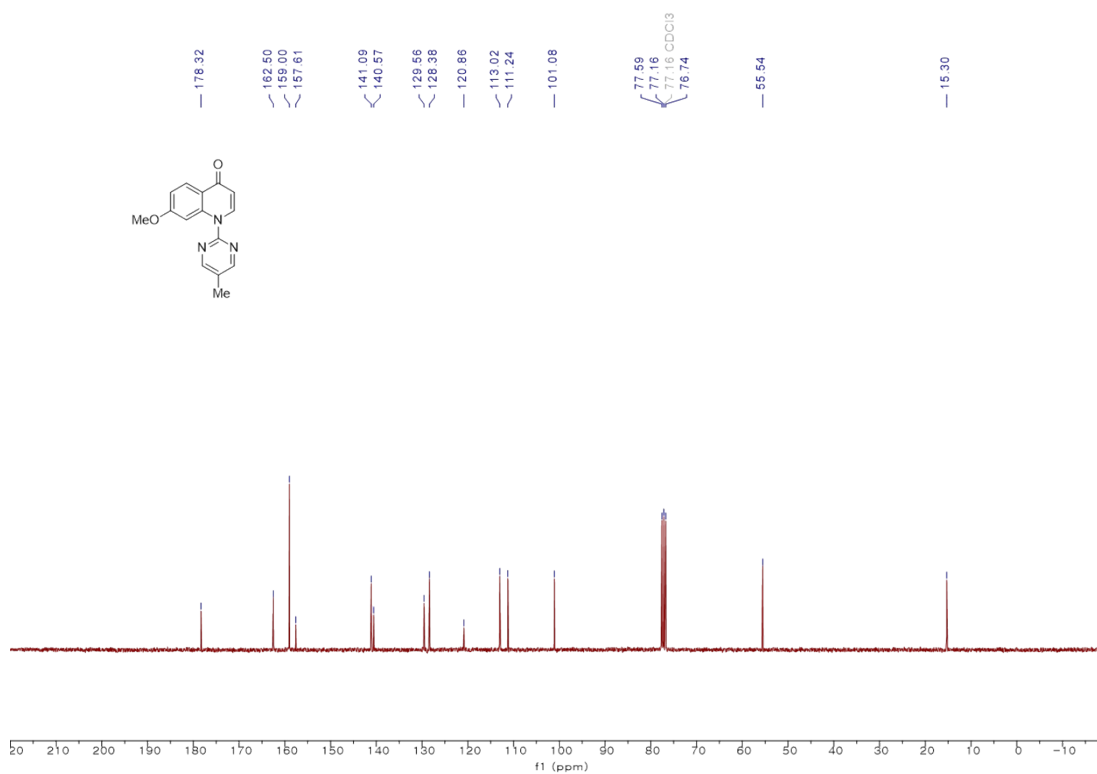

<sup>13</sup>C NMR spectrum of **1t** (75 MHz, Chloroform-*d*)



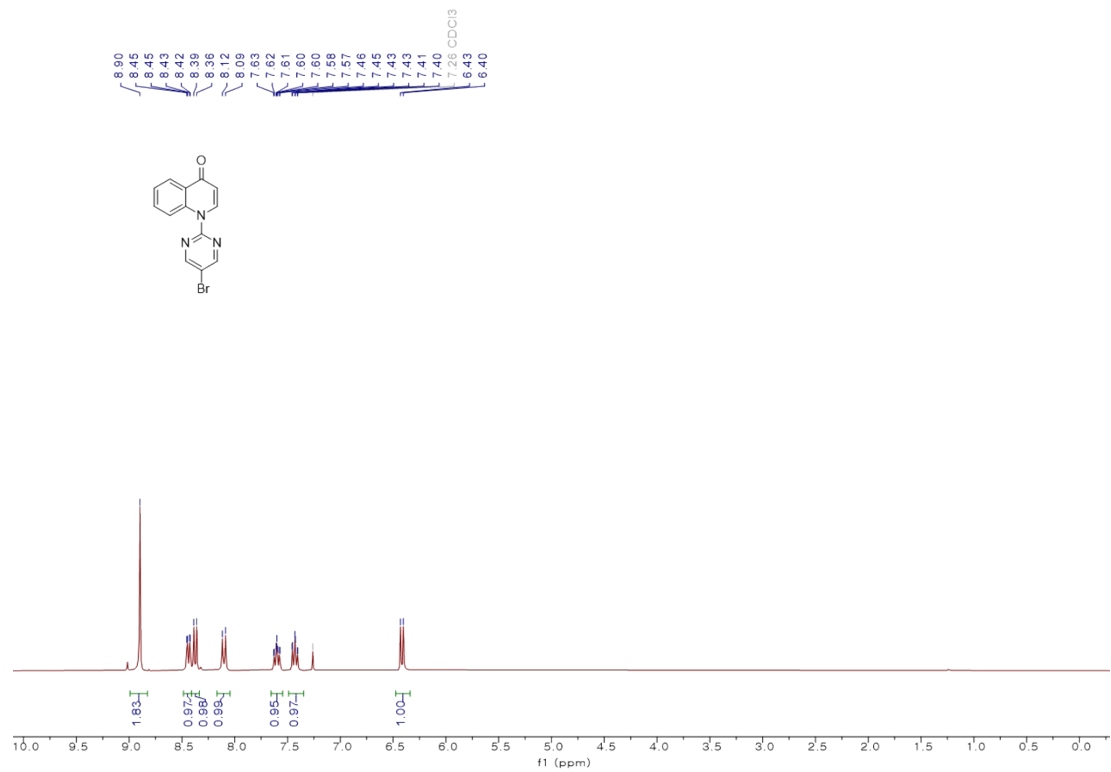

<sup>1</sup>H NMR spectrum of **1u** (300 MHz, Chloroform-*d*)

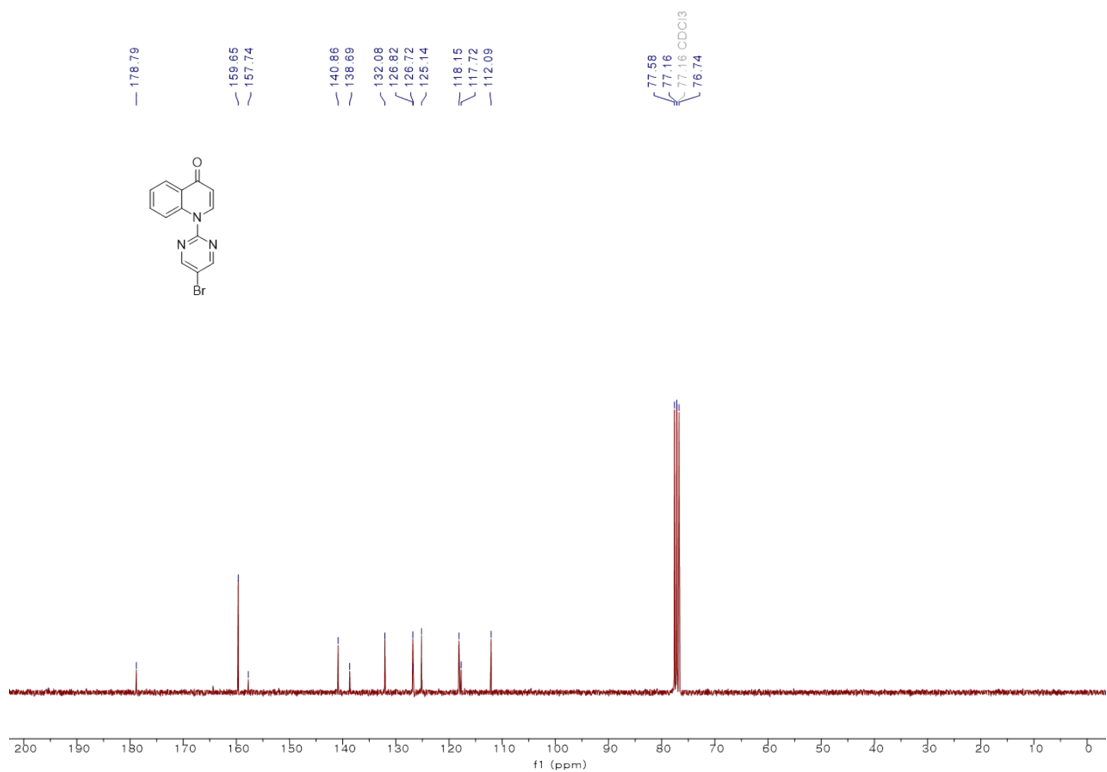

<sup>13</sup>C NMR spectrum of **1u** (75 MHz, Chloroform-*d*)

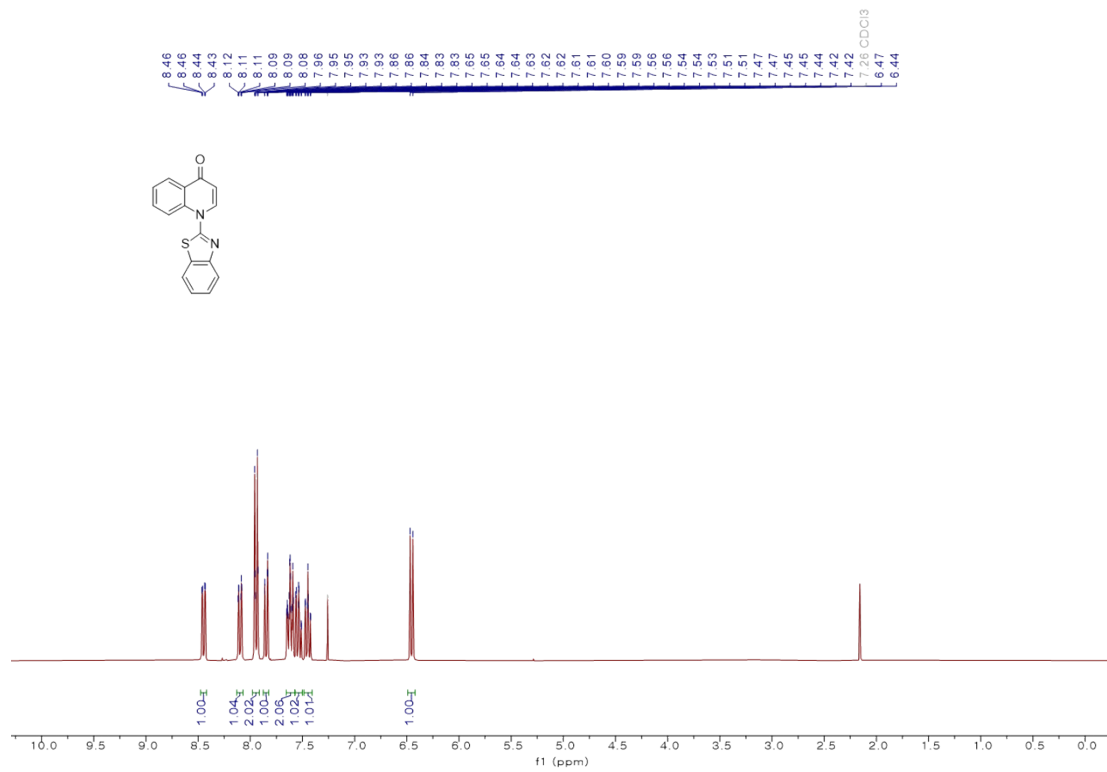

<sup>1</sup>H NMR spectrum of 1v (300 MHz, Chloroform-*d*)

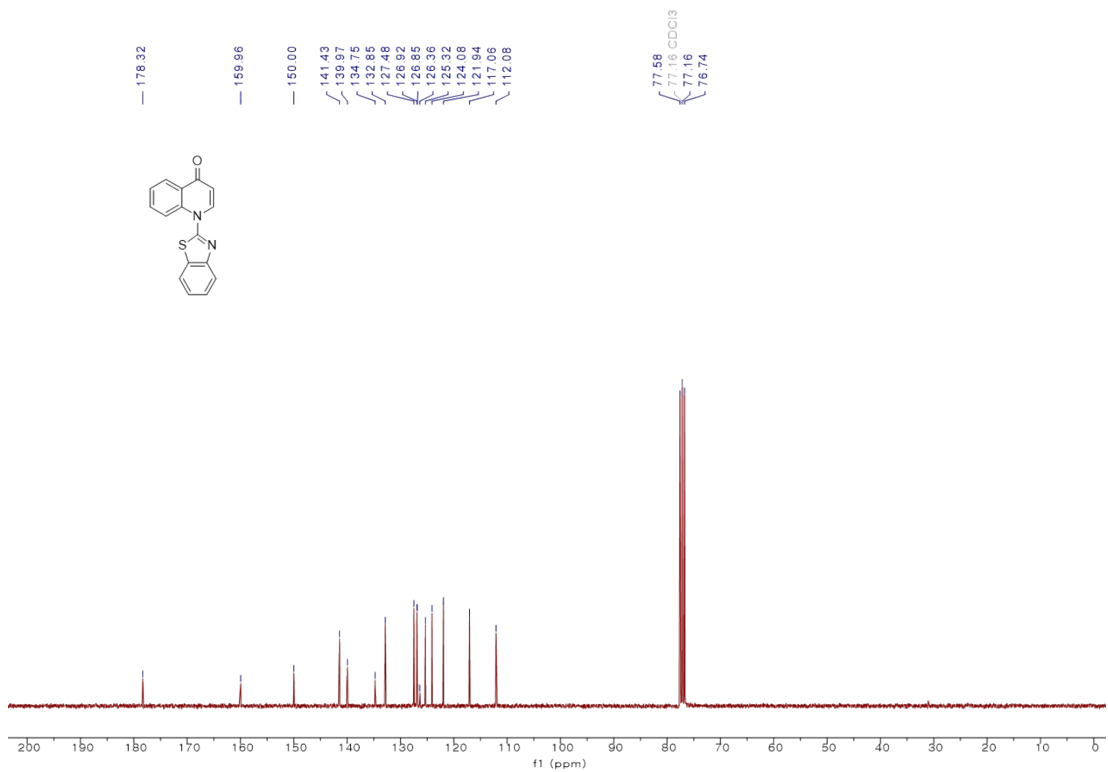

<sup>13</sup>C NMR spectrum of 1v (75 MHz, Chloroform-*d*)

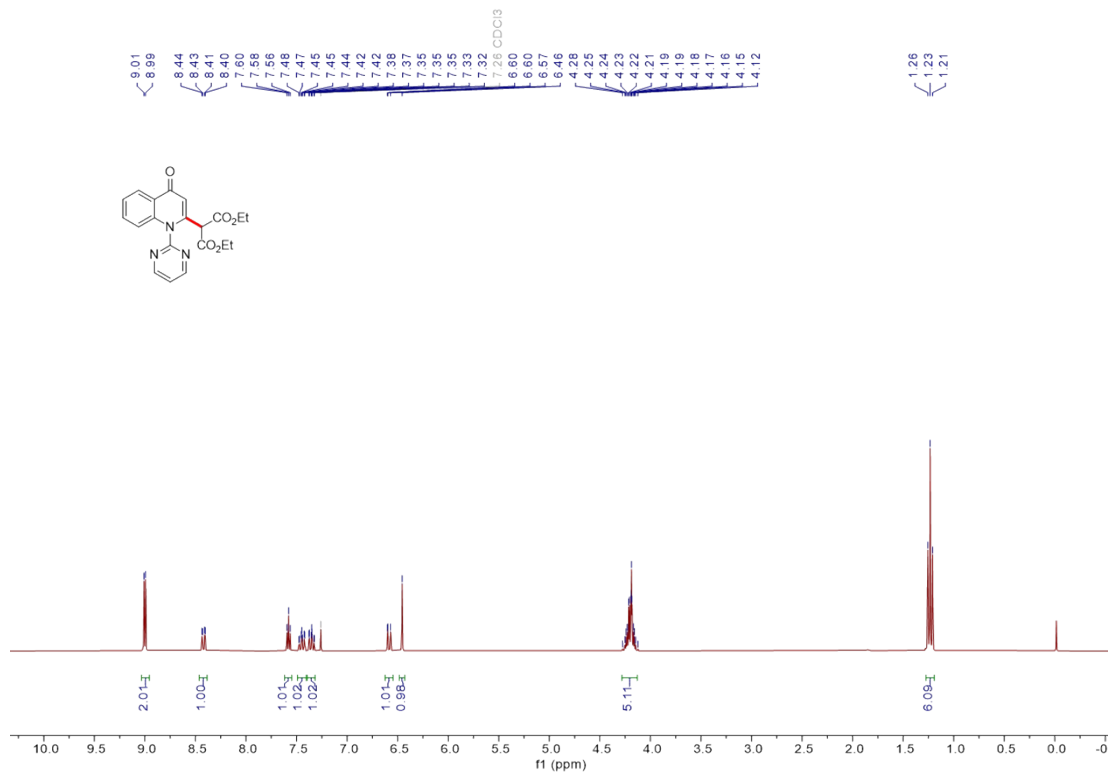

<sup>1</sup>H NMR of **3a** (300 MHz, Chloroform-*d*)

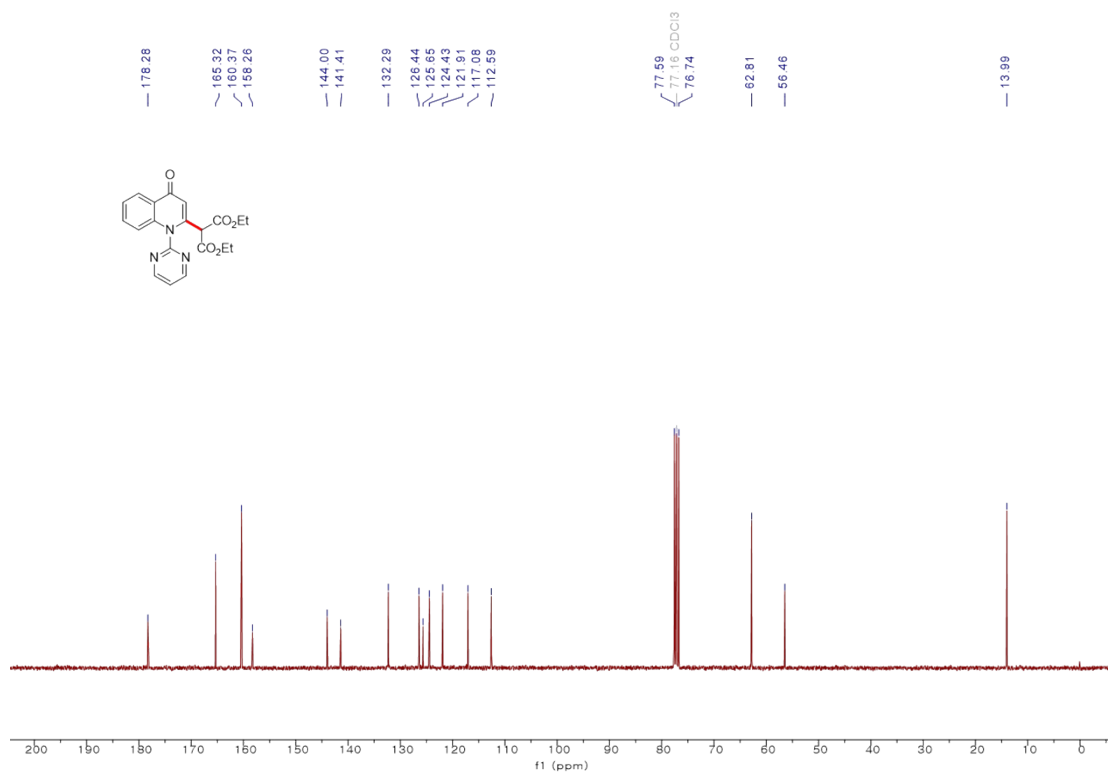

<sup>13</sup>C NMR of **3a** (75 MHz, Chloroform-*d*)

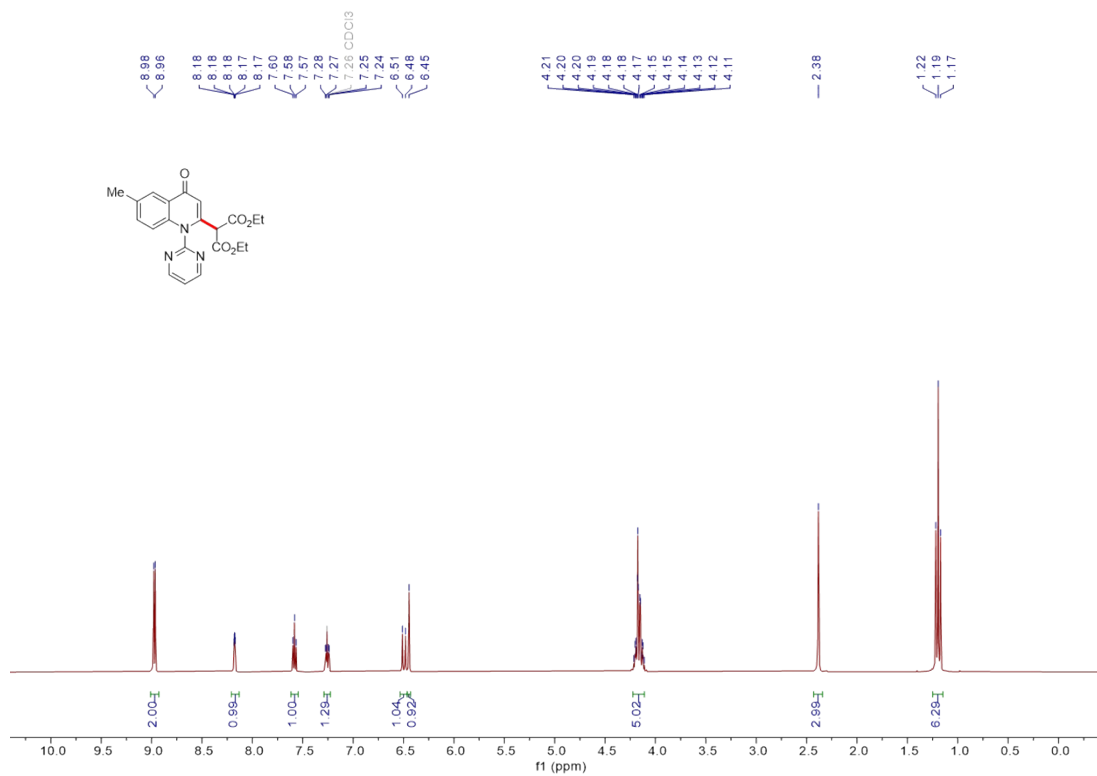

<sup>1</sup>H NMR of **3b** (300 MHz, Chloroform-*d*)

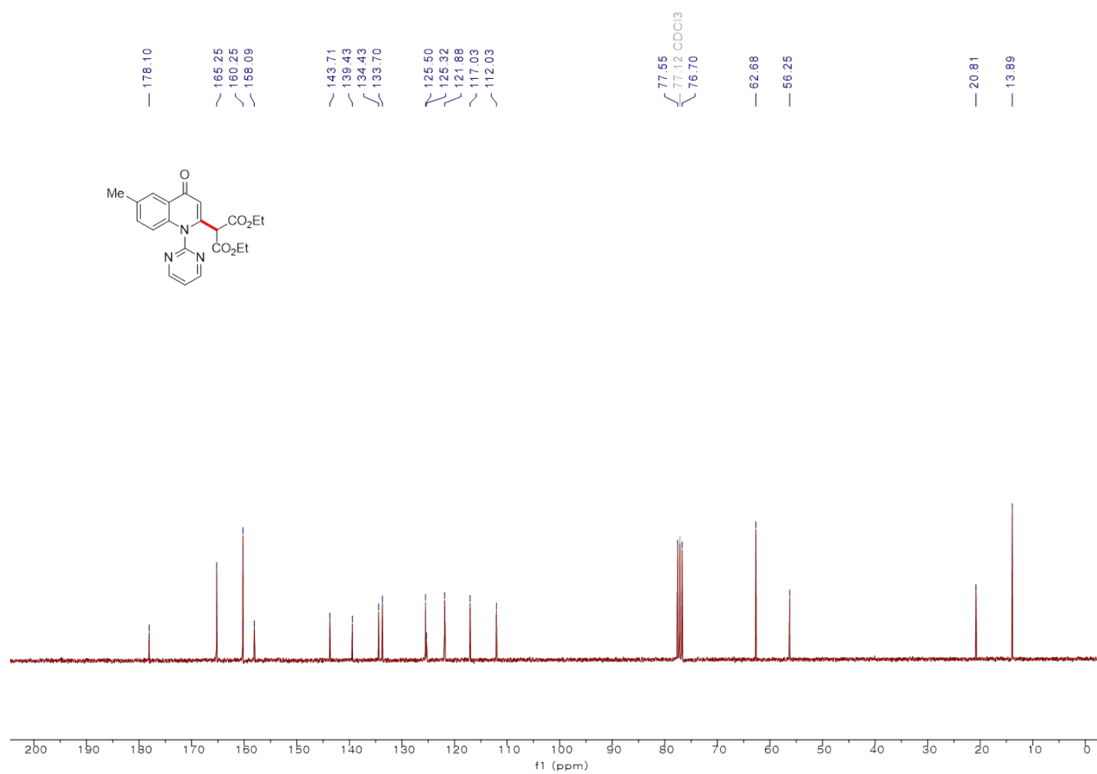

<sup>13</sup>C NMR of **3b** (75 MHz, Chloroform-*d*)

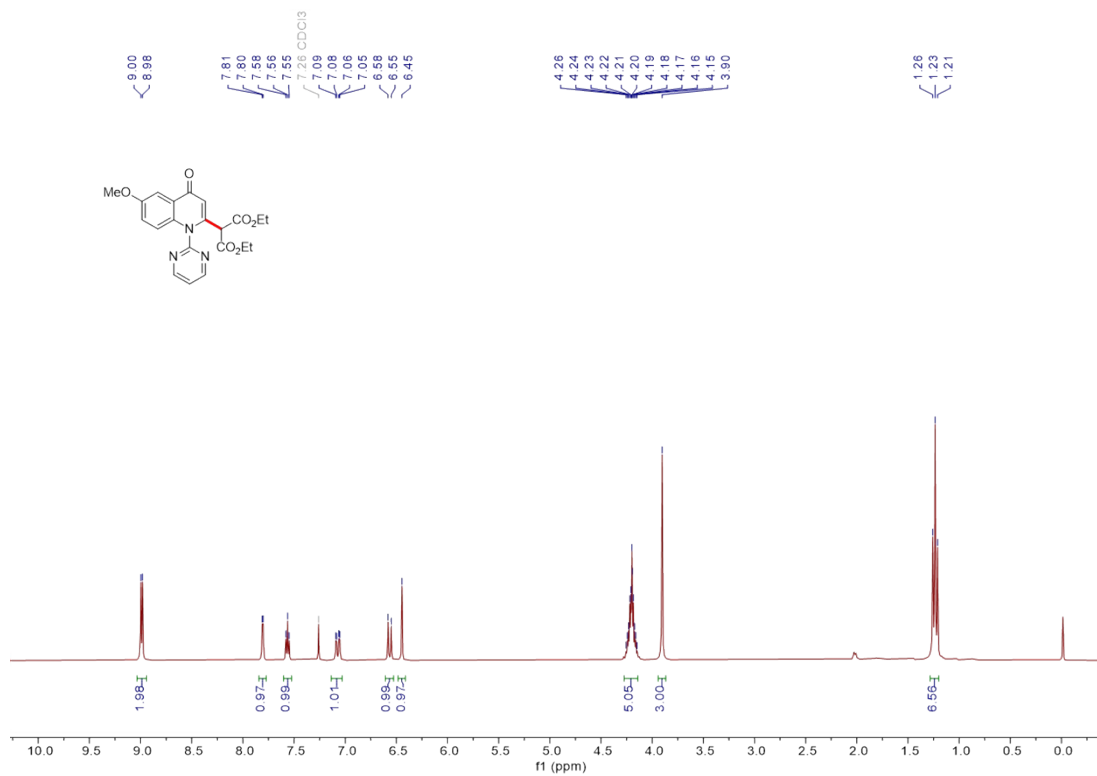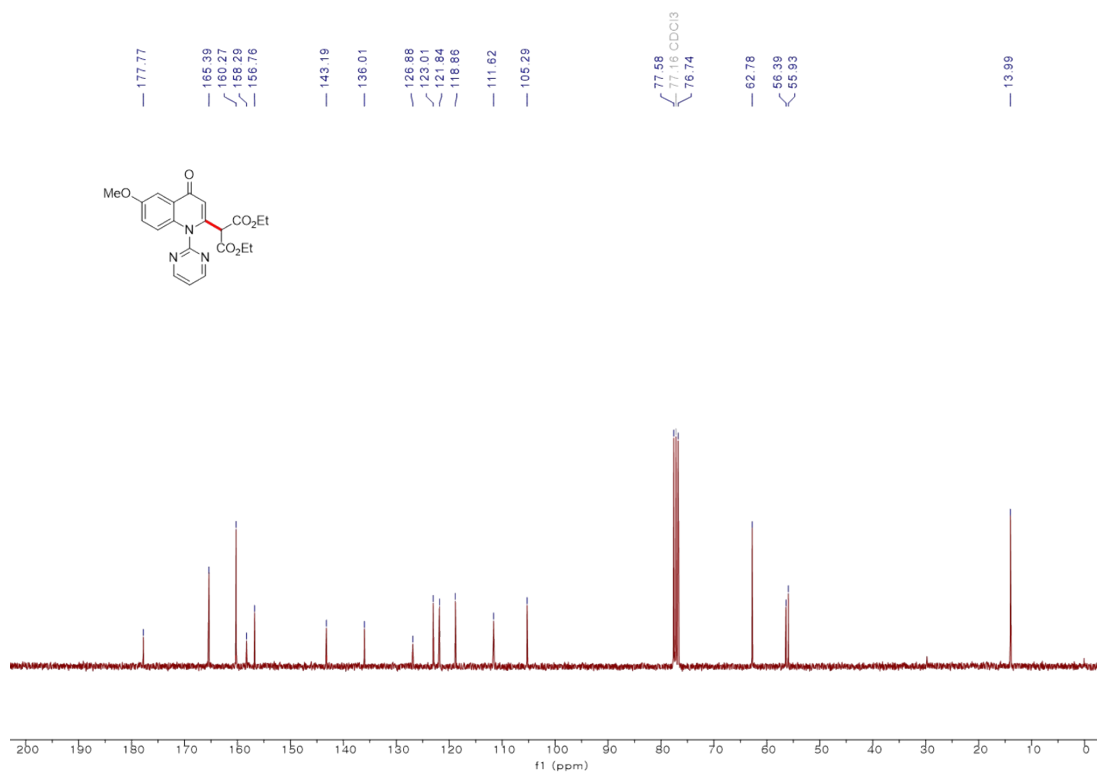

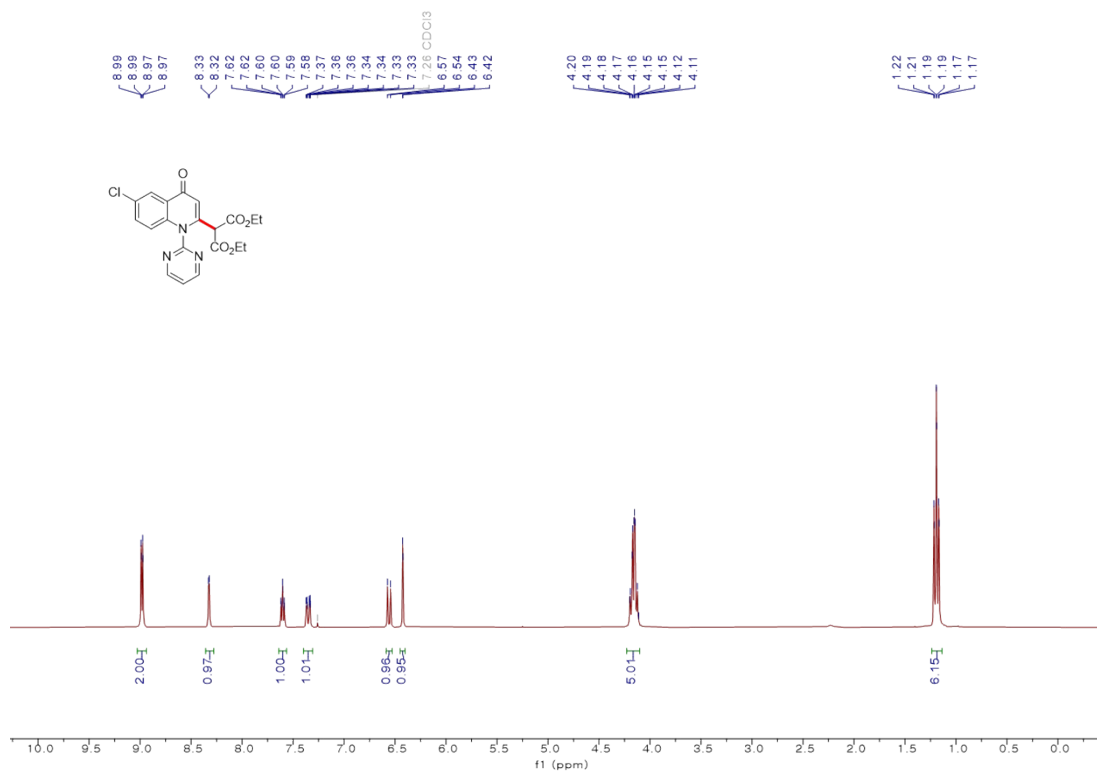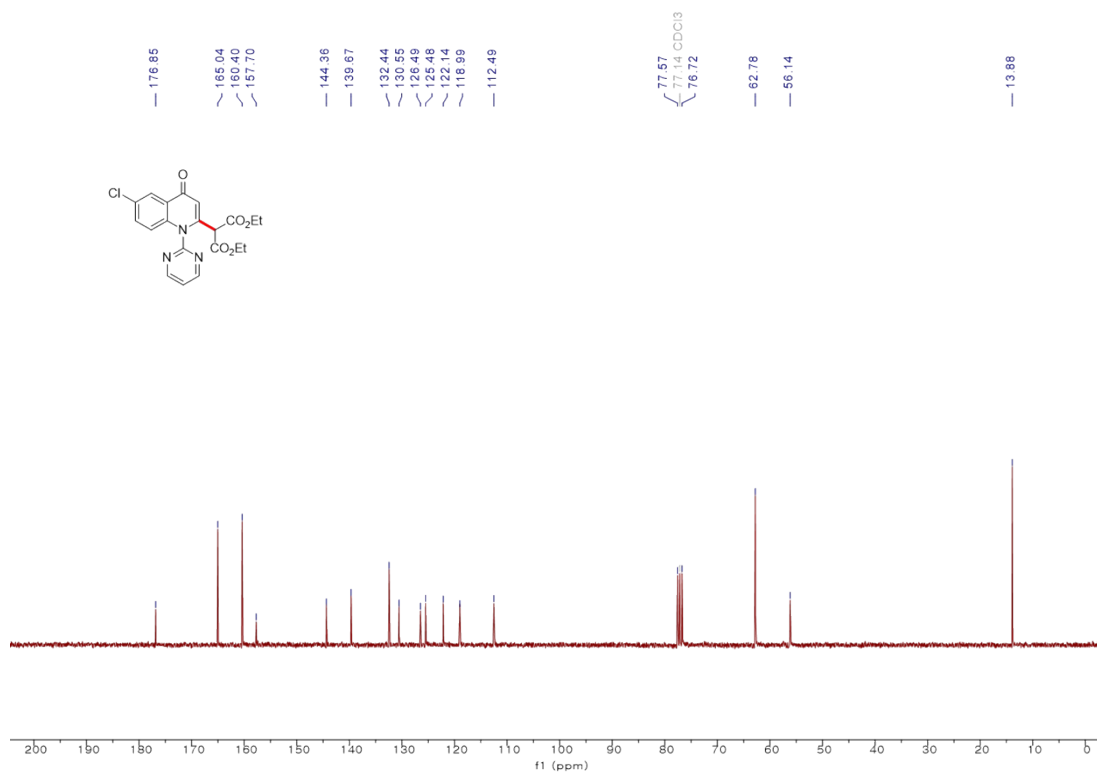

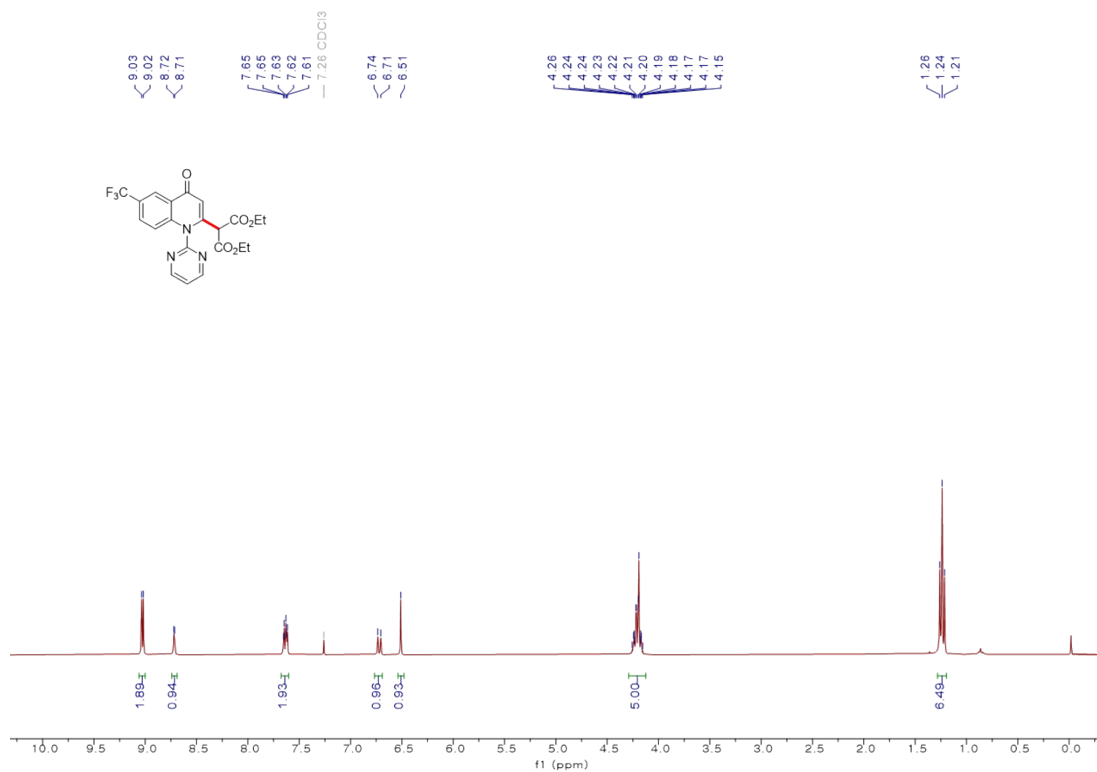

<sup>1</sup>H NMR of **3e** (300 MHz, Chloroform-*d*)

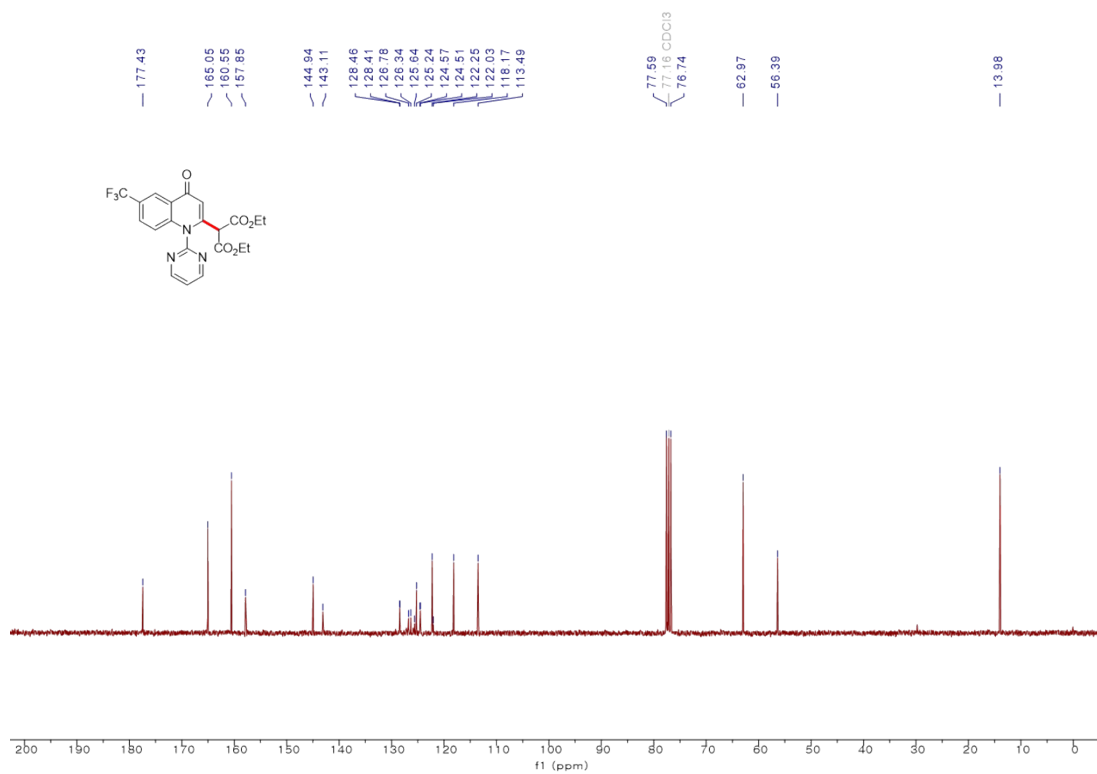

<sup>13</sup>C NMR of **3e** (75 MHz, Chloroform-*d*)

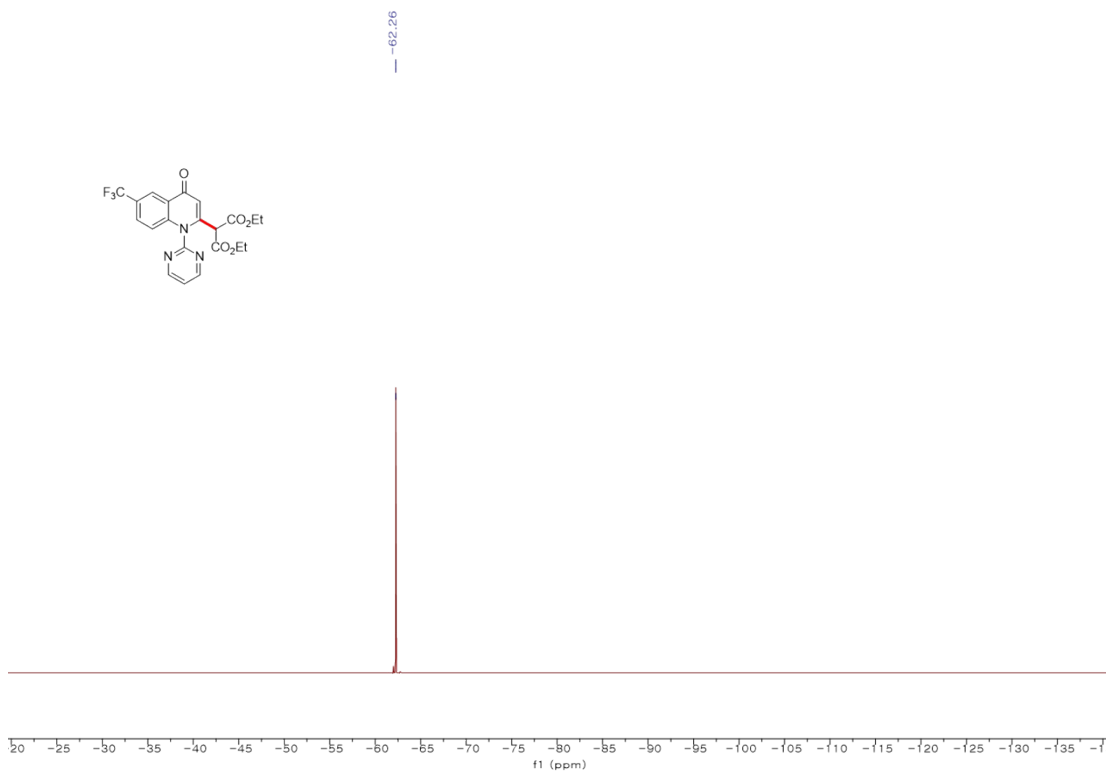

$^{19}\text{F}$  NMR of **3e** (471MHz, Chloroform-*d*)

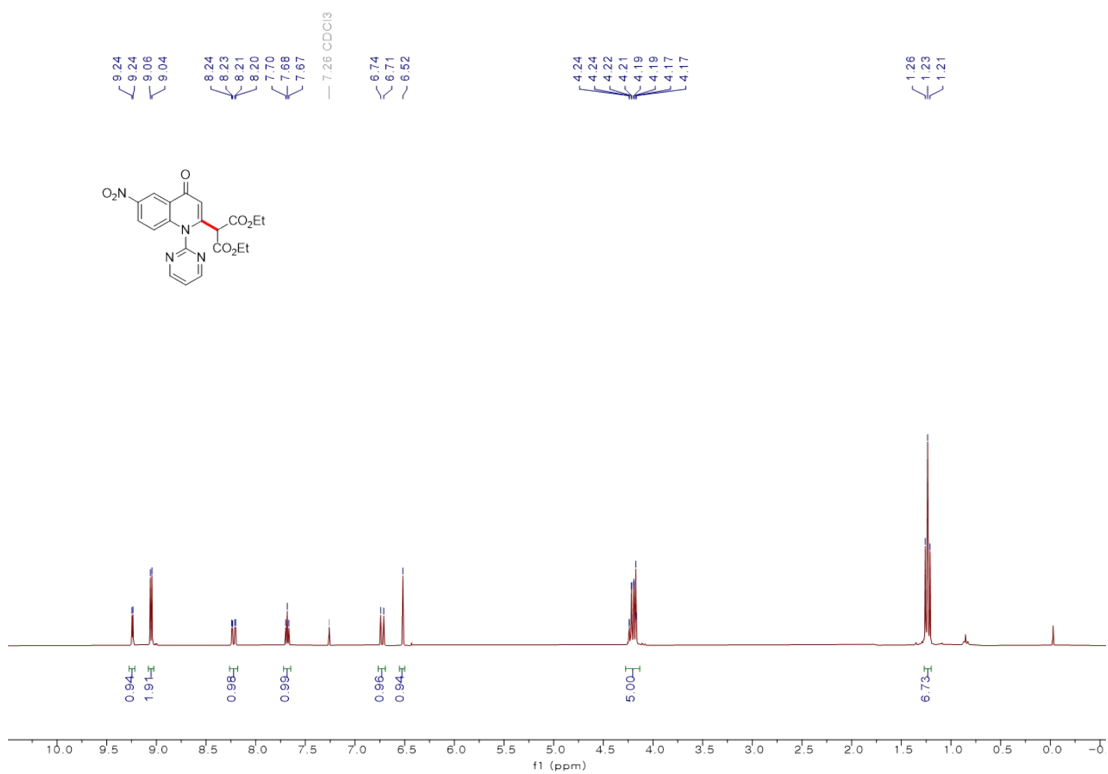

$^1\text{H}$  NMR of **3f** (300 MHz, Chloroform-*d*)





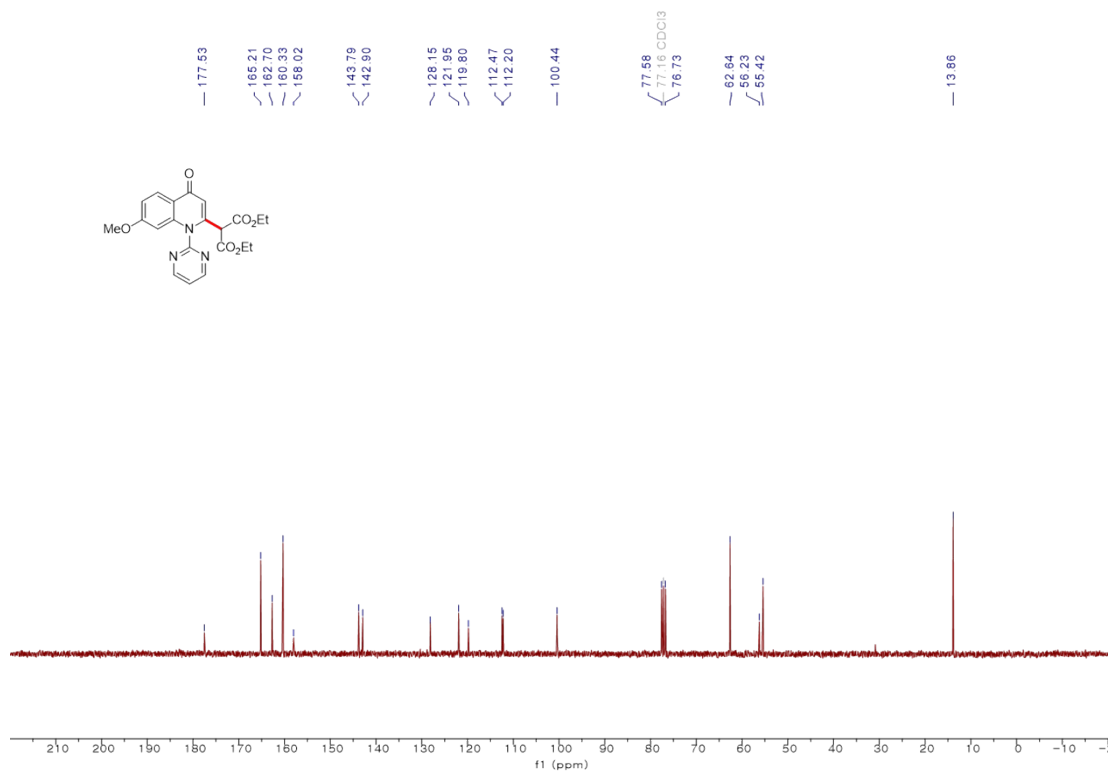

<sup>13</sup>C NMR of **3g** (75 MHz, Chloroform-*d*)

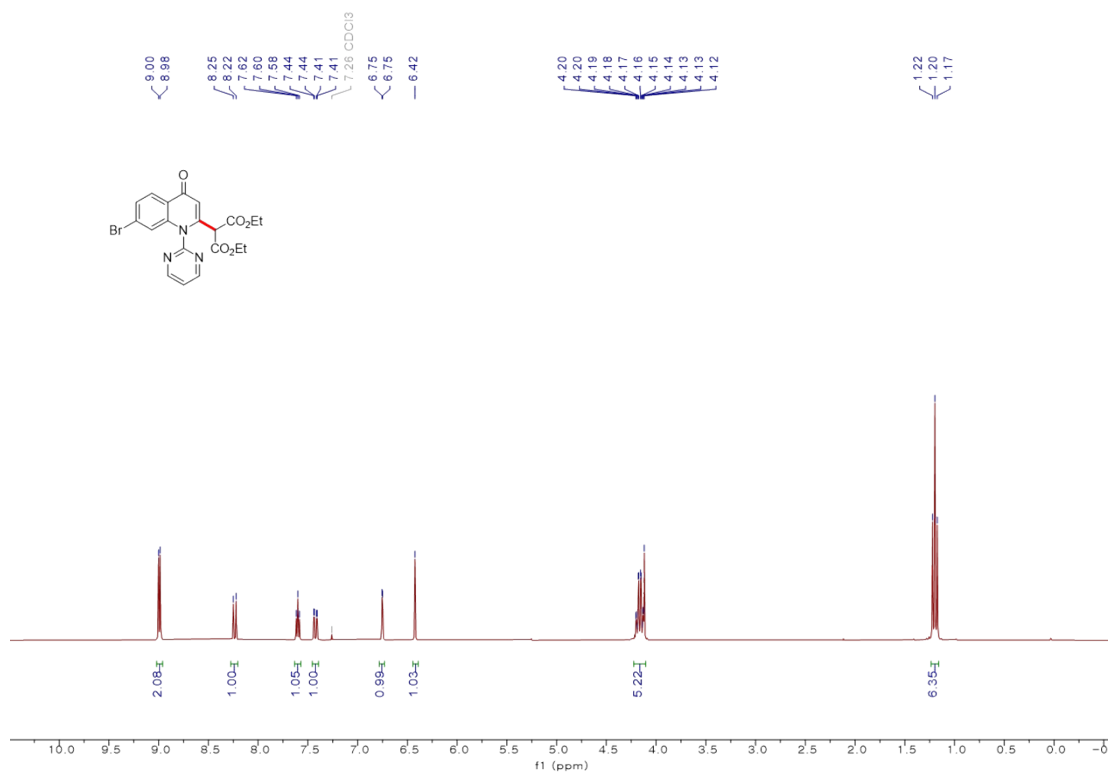

<sup>1</sup>H NMR of **3h** (300 MHz, Chloroform-*d*)

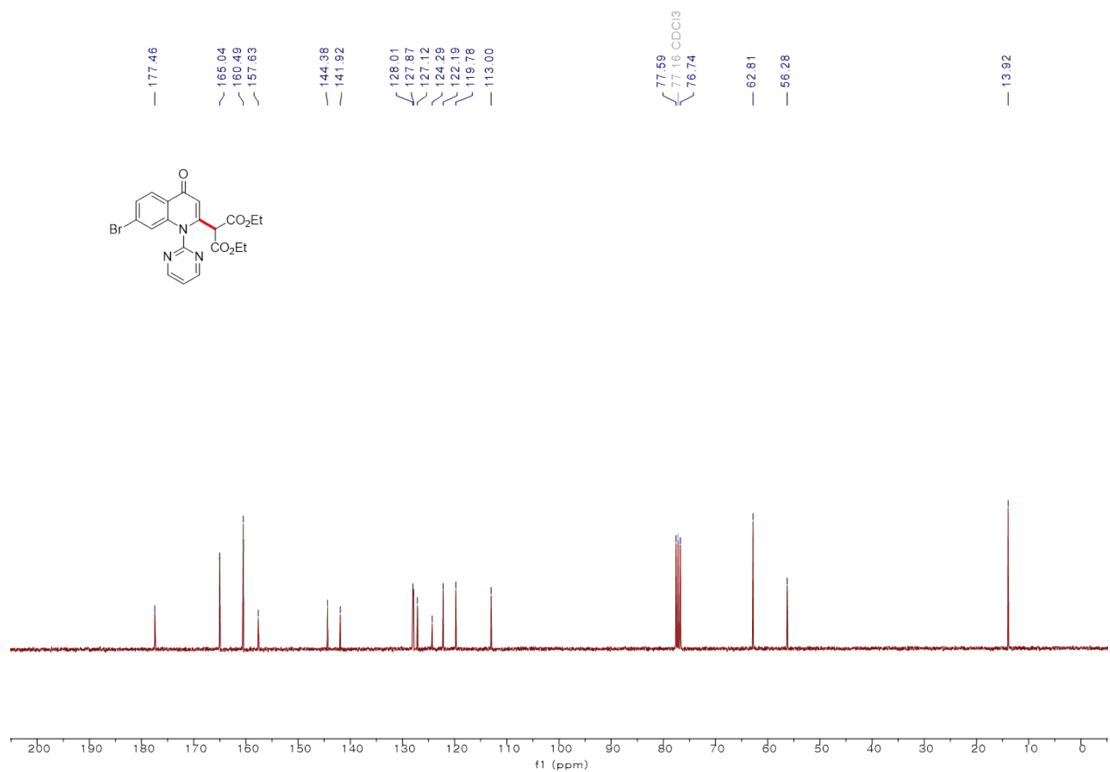

<sup>13</sup>C NMR of **3h** (75 MHz, Chloroform-*d*)

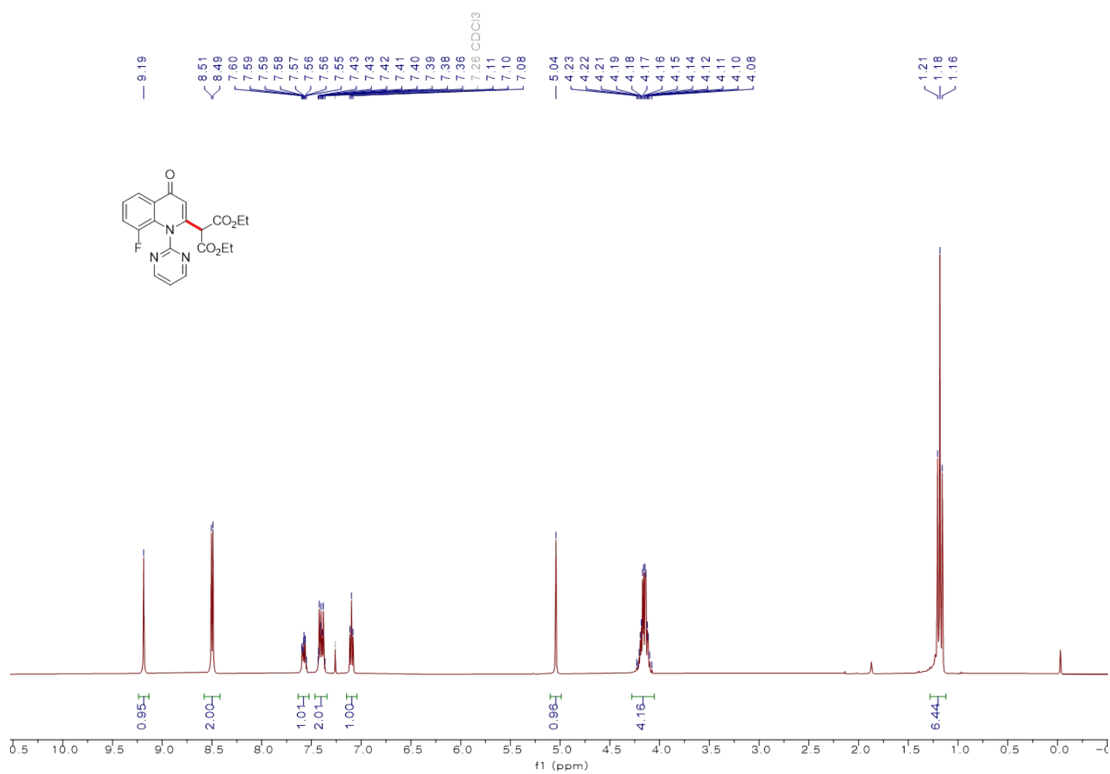

<sup>1</sup>H NMR of **3i** (300 MHz, Chloroform-*d*)

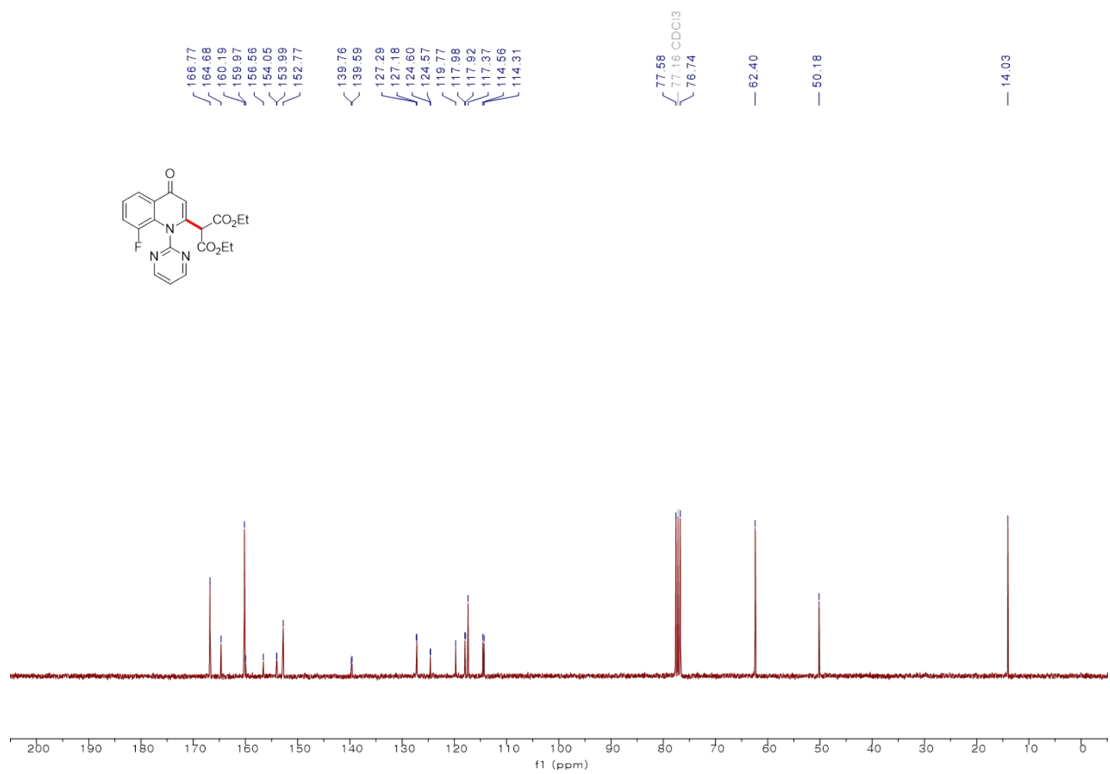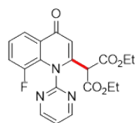

<sup>13</sup>C NMR of **3i** (75 MHz, Chloroform-*d*)

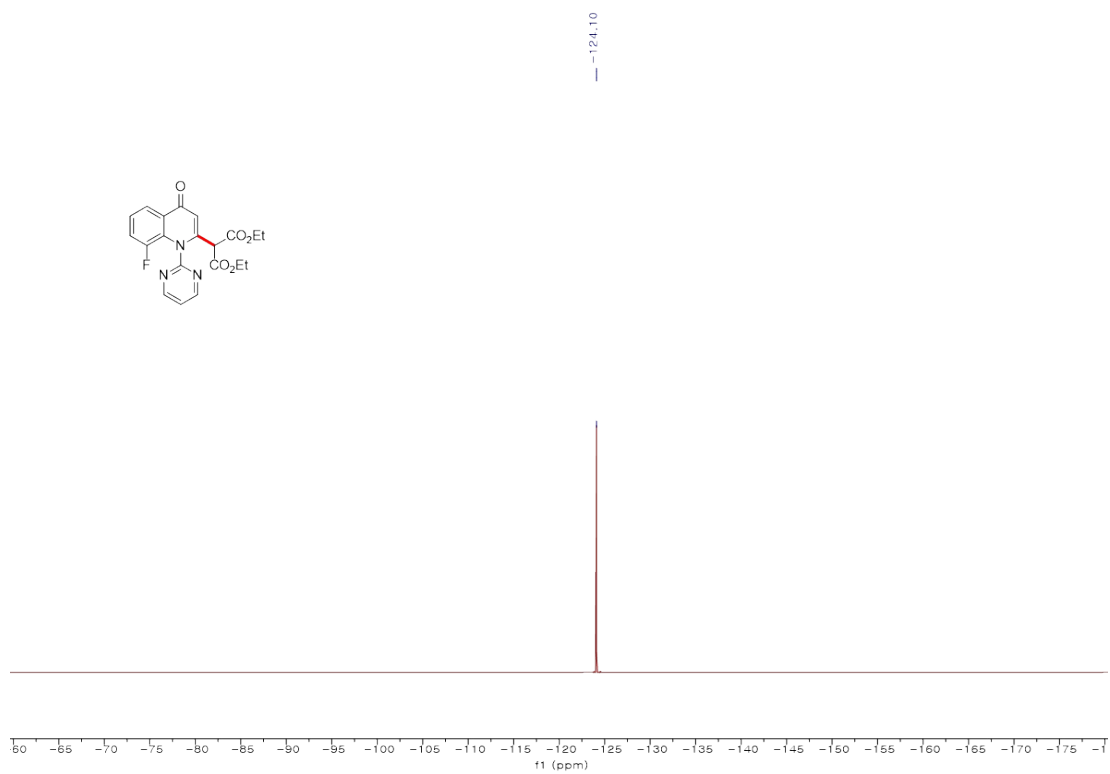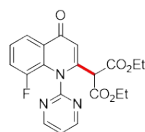

<sup>19</sup>F NMR of **3i** (471 MHz, Chloroform-*d*)

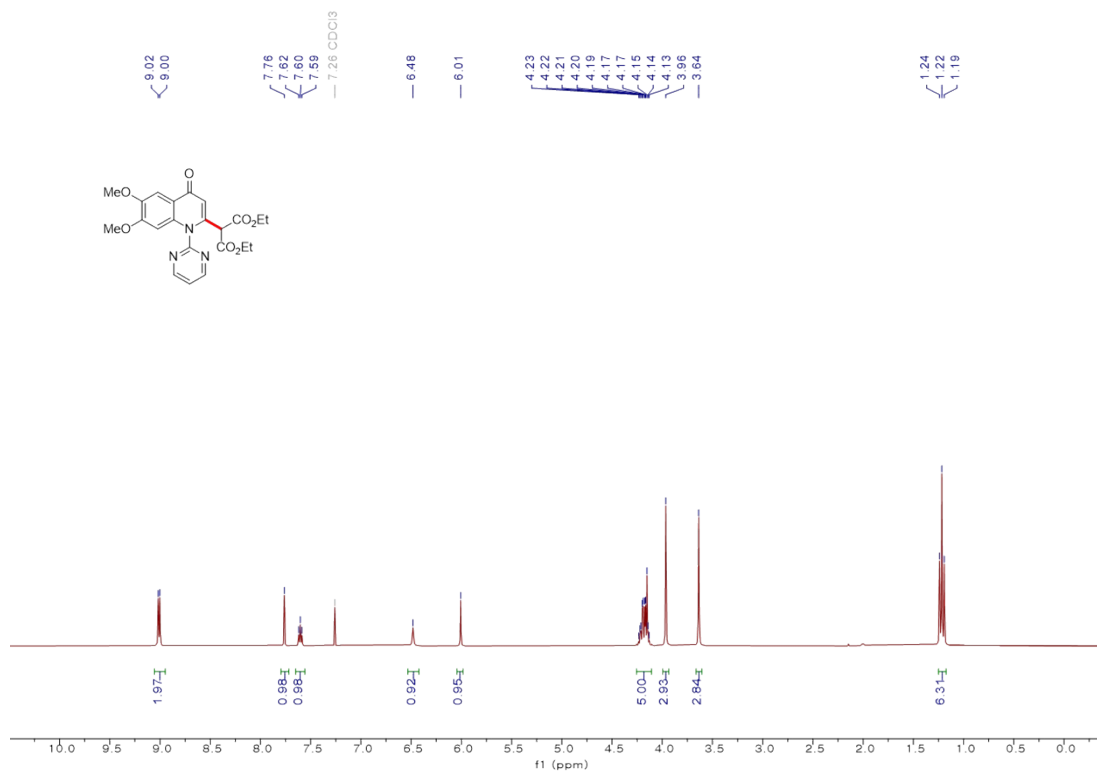

<sup>1</sup>H NMR of **3j** (300 MHz, Chloroform-*d*)

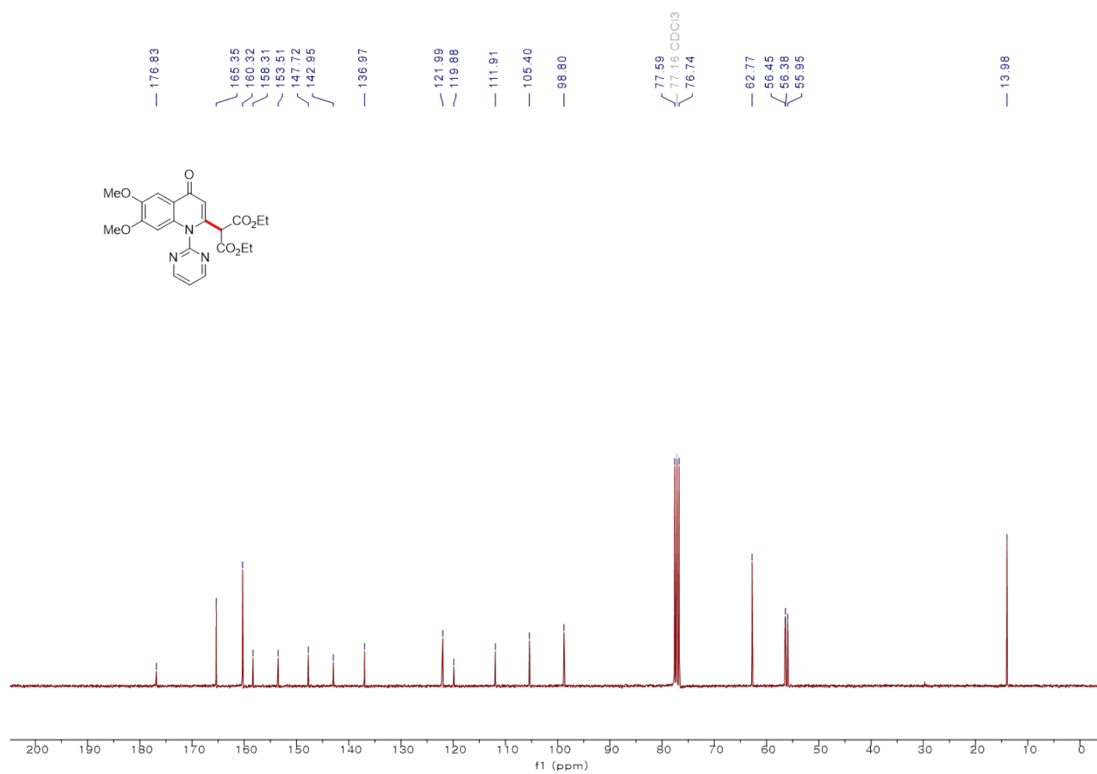

<sup>13</sup>C NMR of **3j** (75 MHz, Chloroform-*d*)

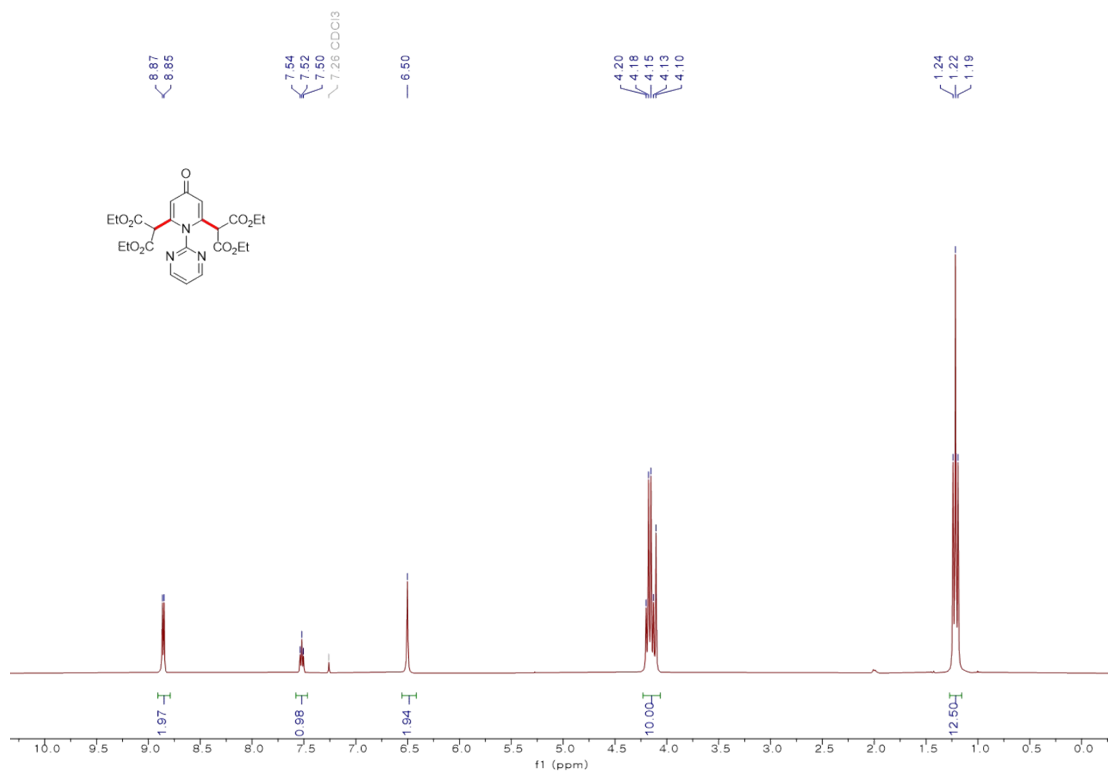

<sup>1</sup>H NMR of **3k** (300 MHz, Chloroform-*d*)

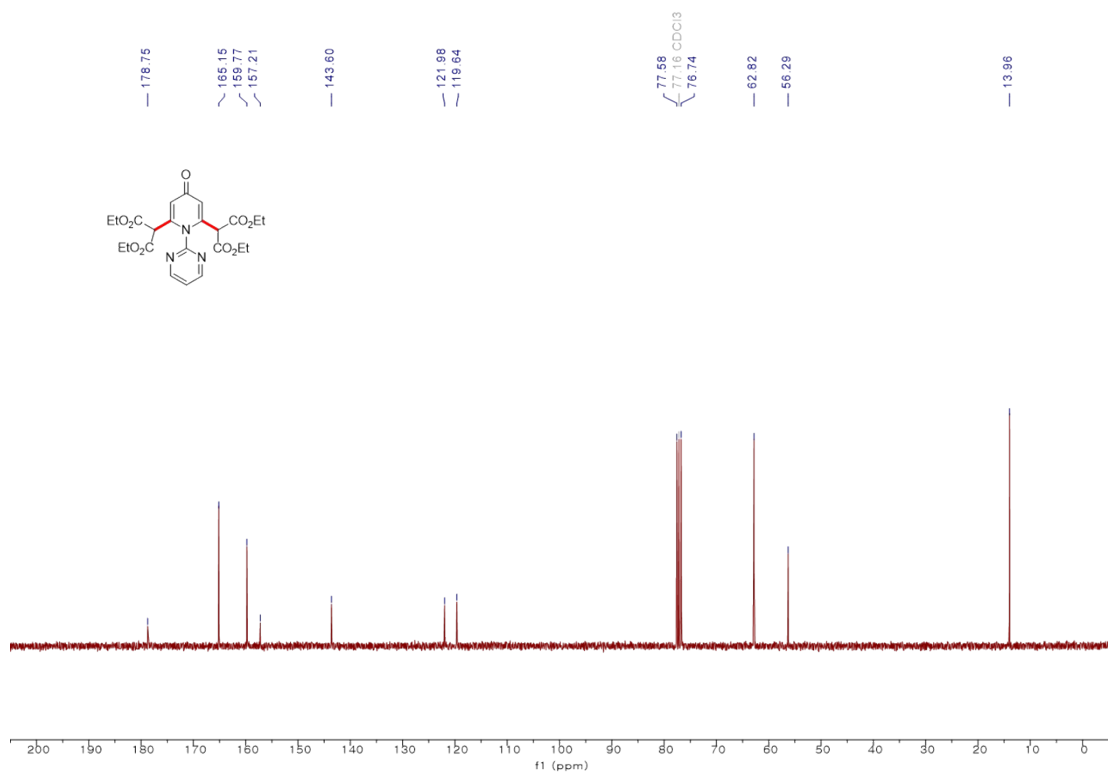

<sup>13</sup>C NMR of **3k** (75 MHz, Chloroform-*d*)

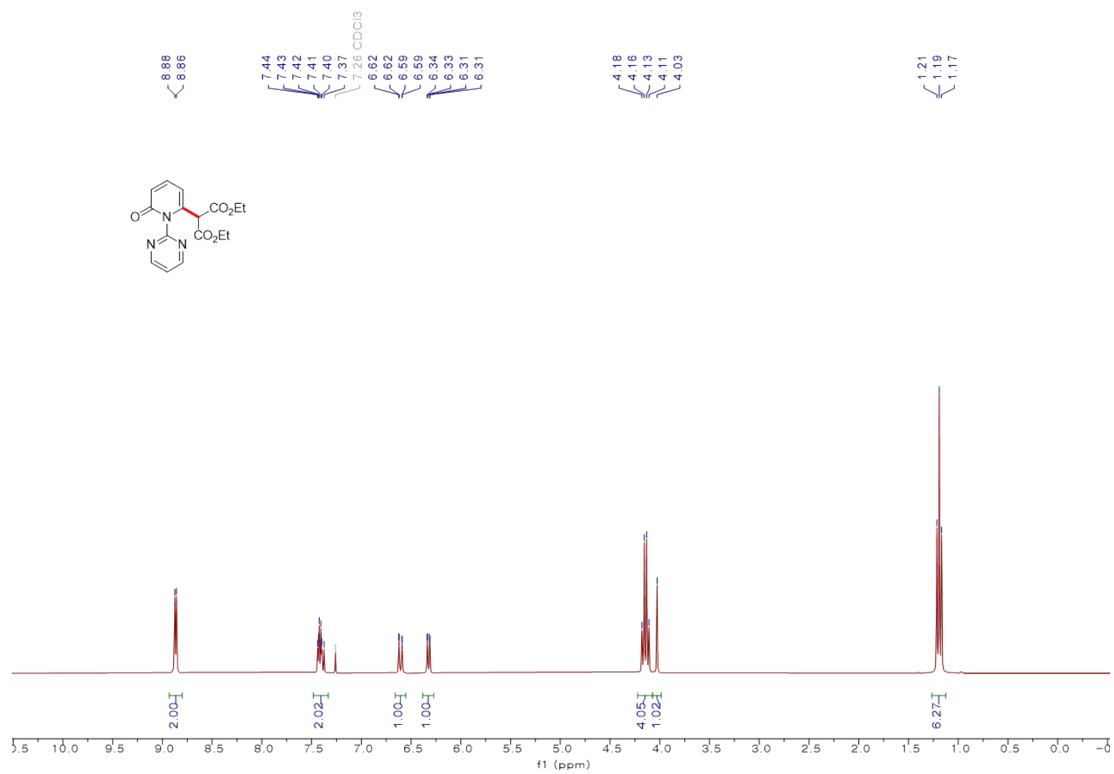

<sup>1</sup>H NMR of **31** (300 MHz, Chloroform-*d*)

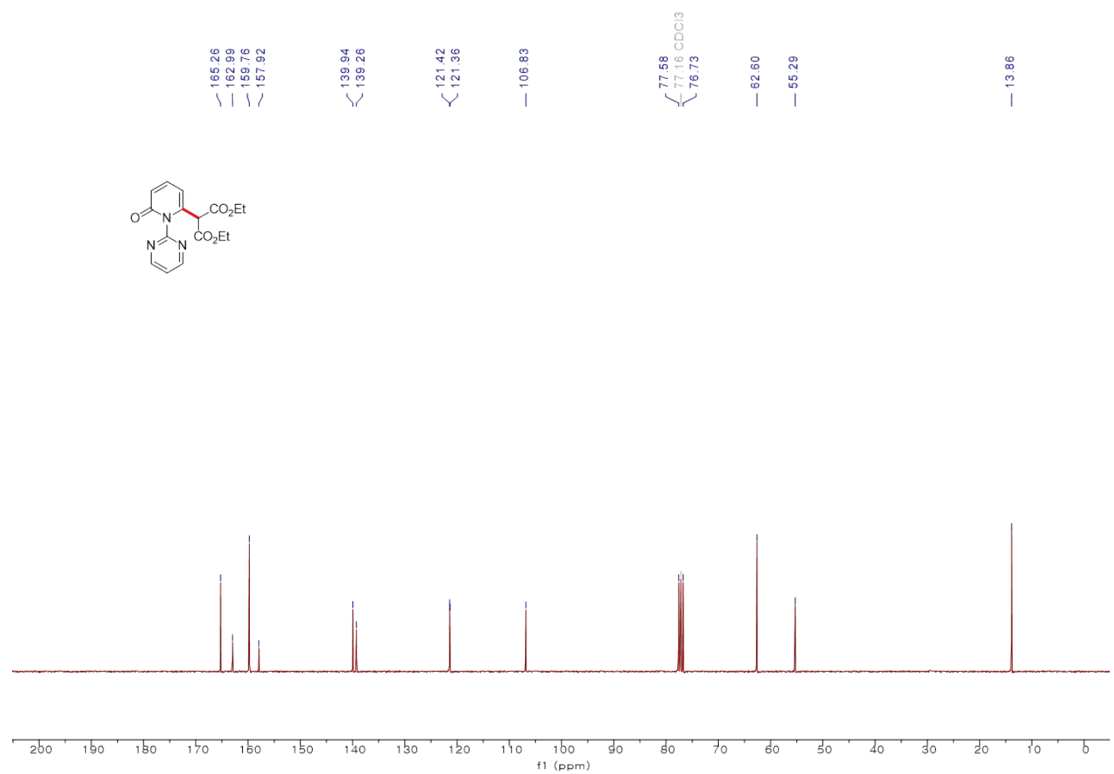

<sup>13</sup>C NMR of **31** (75 MHz, Chloroform-*d*)

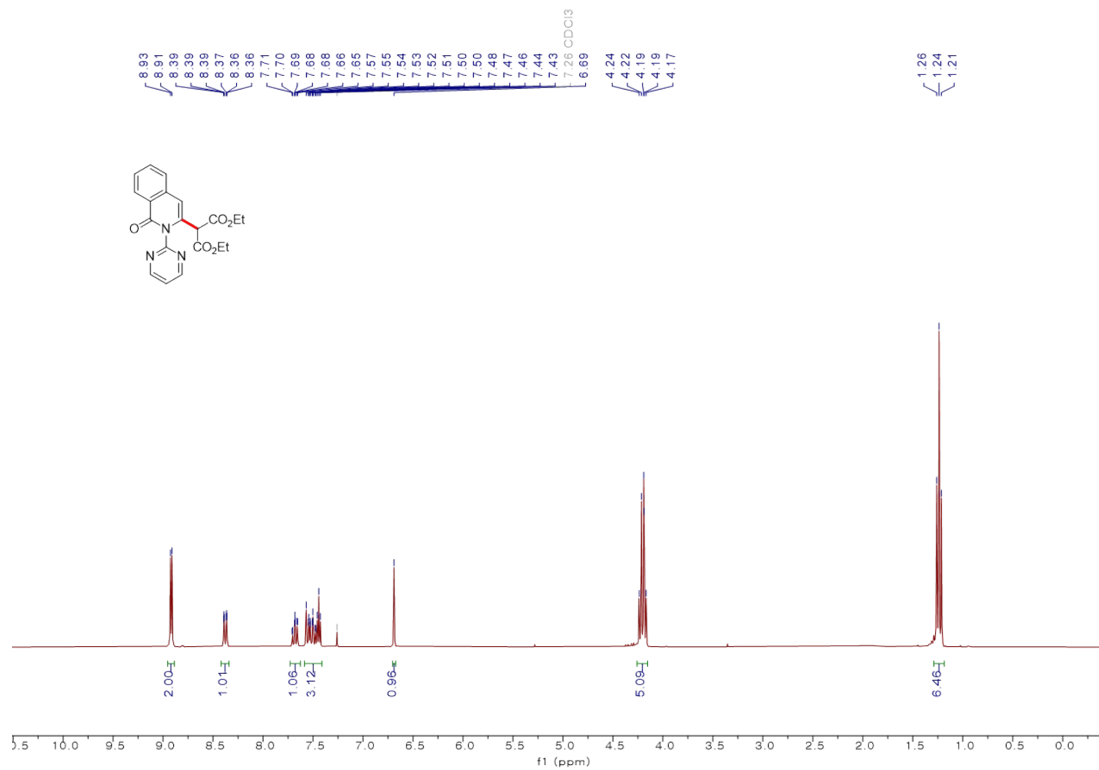

<sup>1</sup>H NMR of **3m** (300 MHz, Chloroform-*d*)

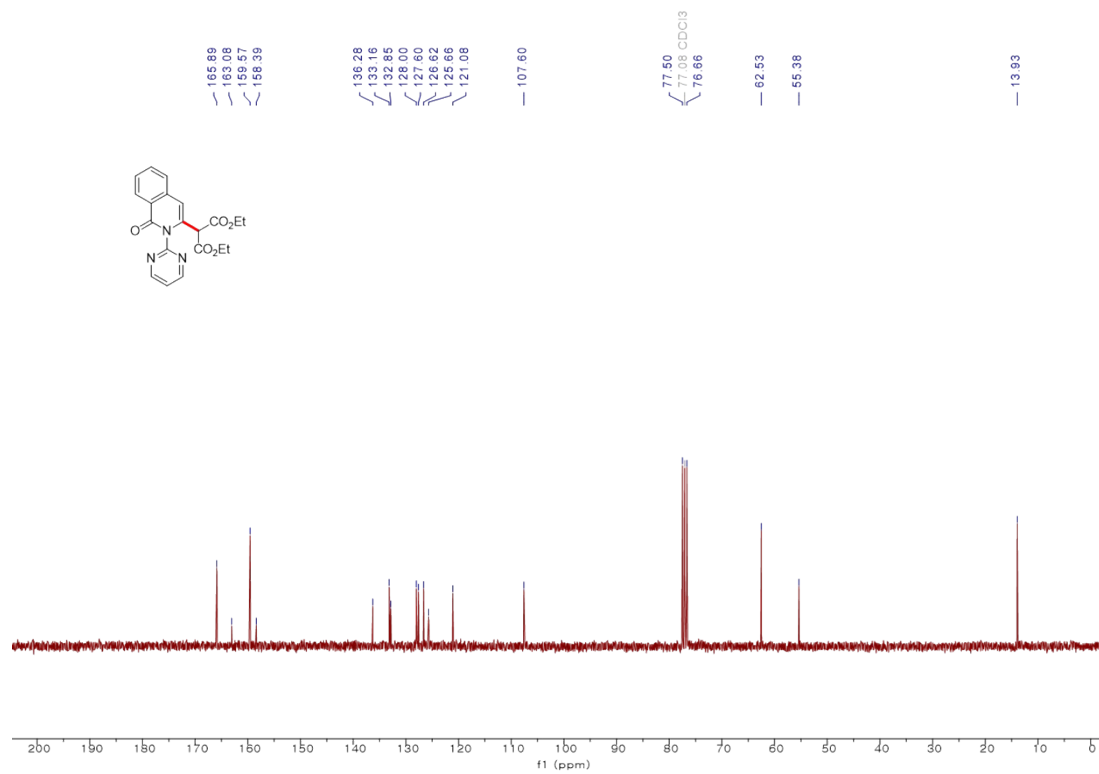

<sup>13</sup>C NMR of **3m** (75 MHz, Chloroform-*d*)



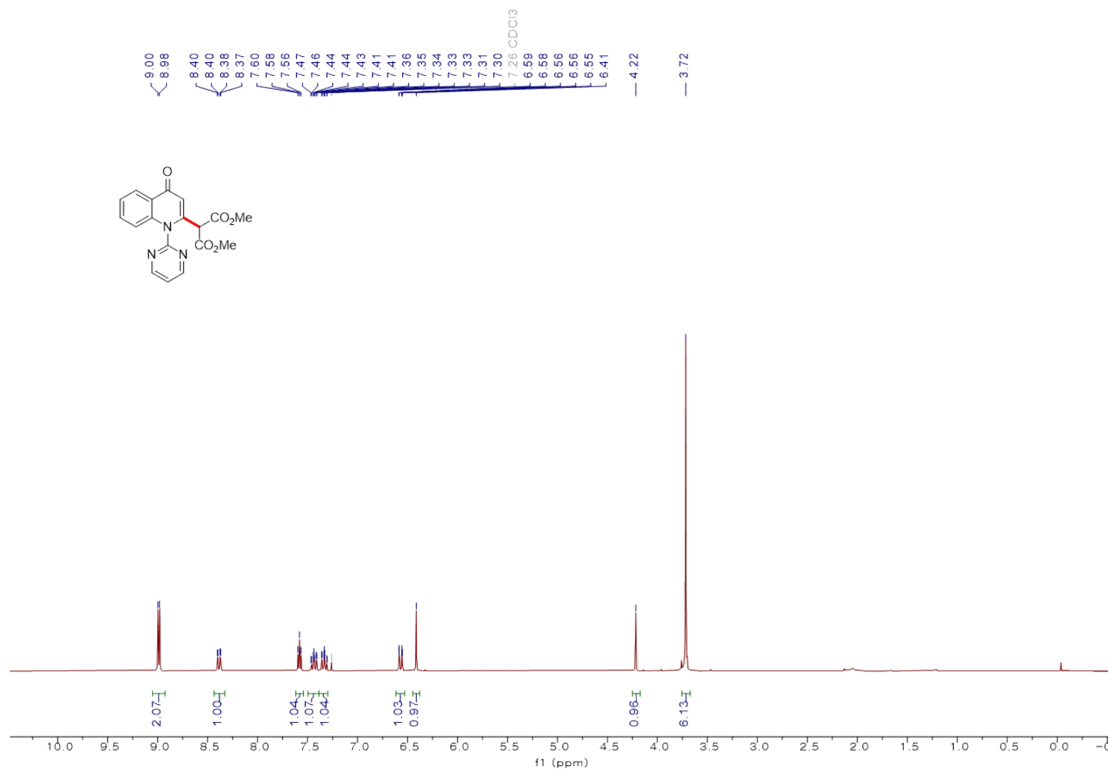

$^1\text{H NMR}$  of **3n** (300 MHz, Chloroform-*d*)

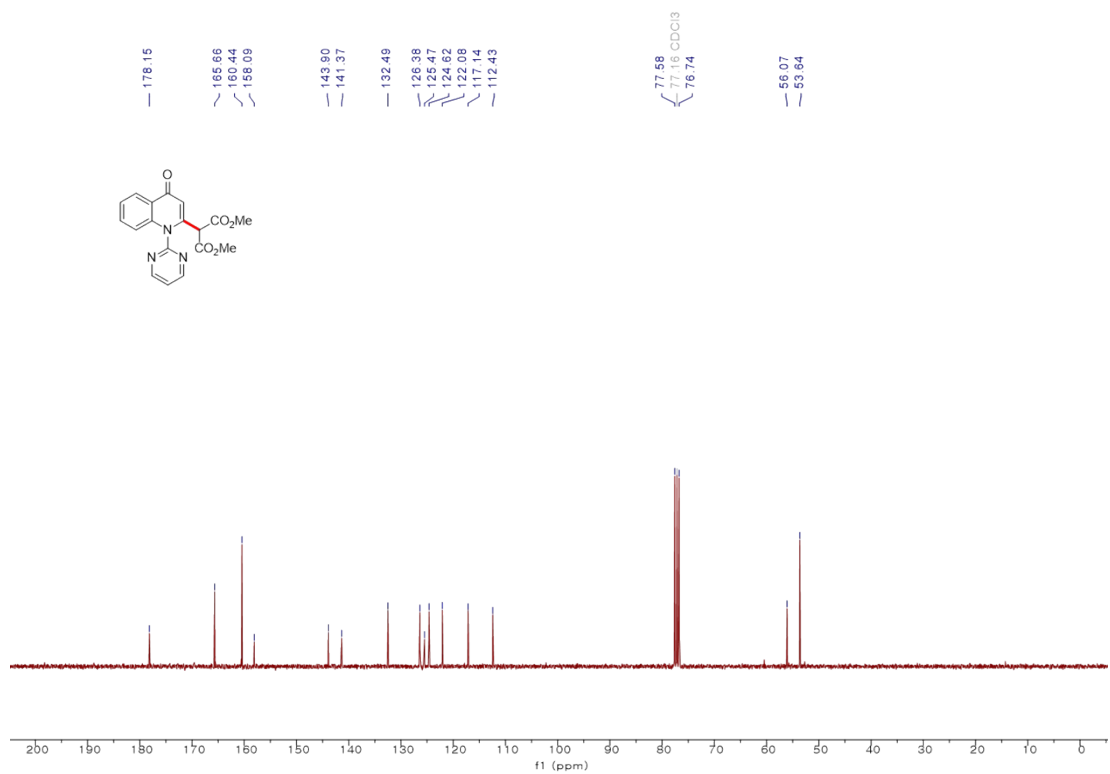

$^{13}\text{C NMR}$  of **3n** (75 MHz, Chloroform-*d*)

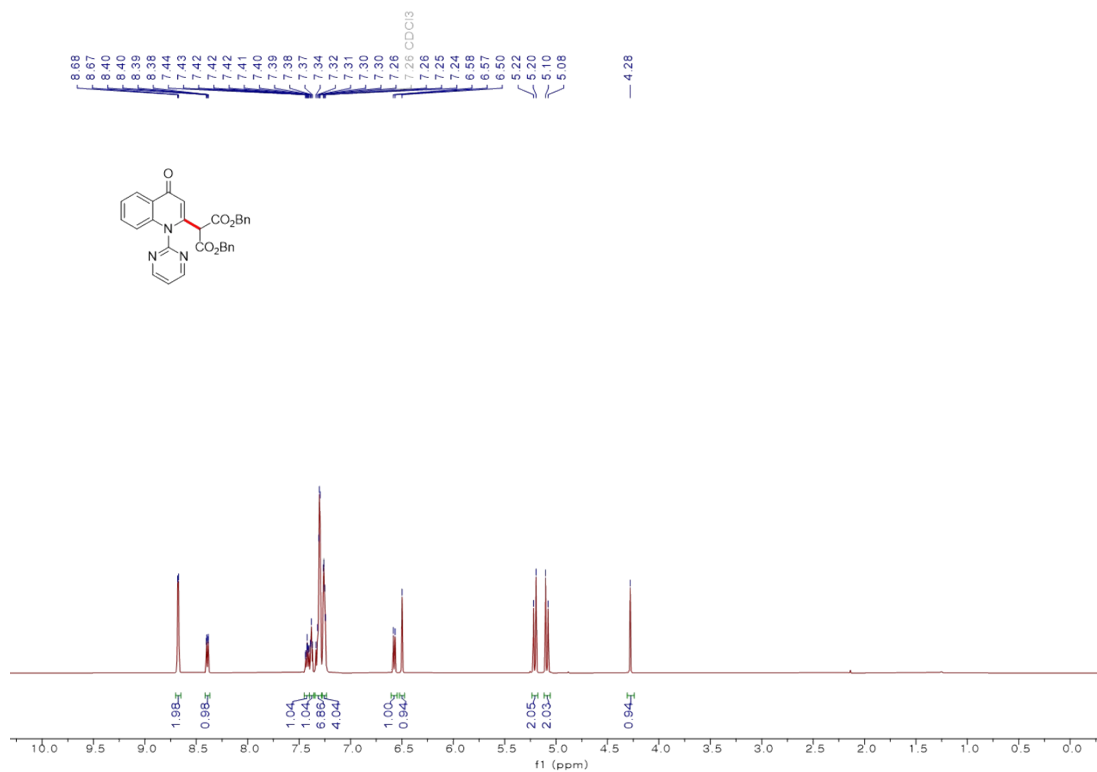

<sup>1</sup>H NMR of **3o** (300 MHz, Chloroform-*d*)

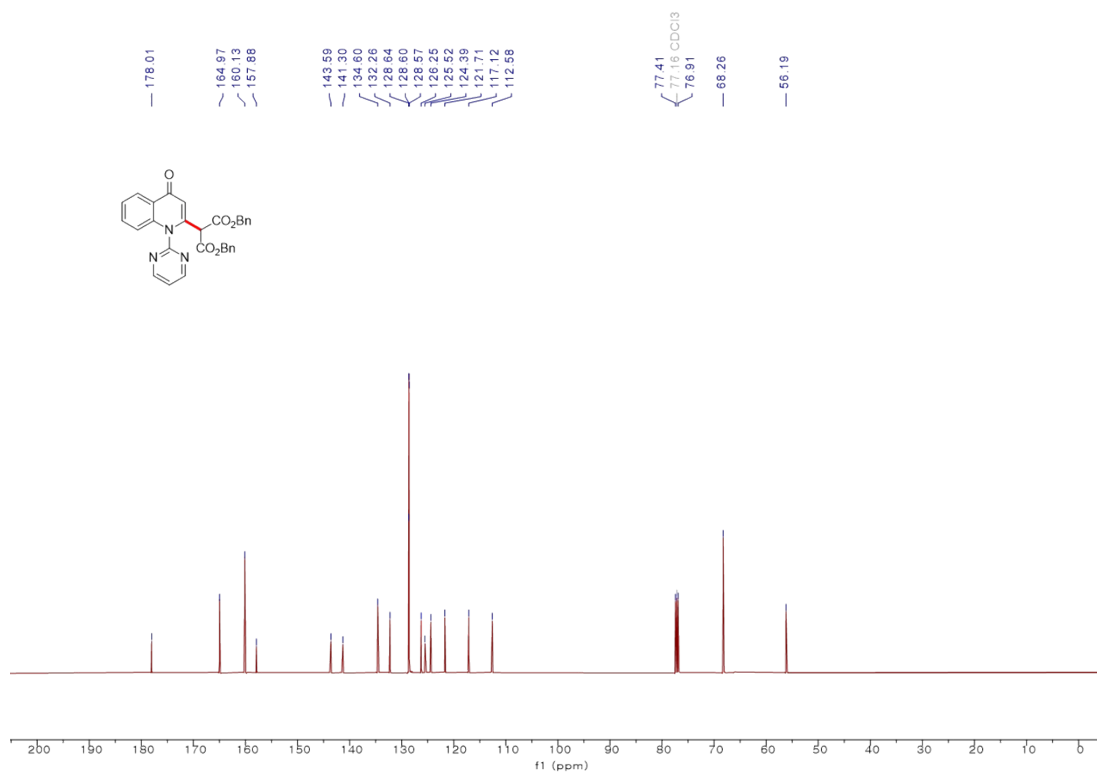

<sup>13</sup>C NMR of **3o** (75 MHz, Chloroform-*d*)

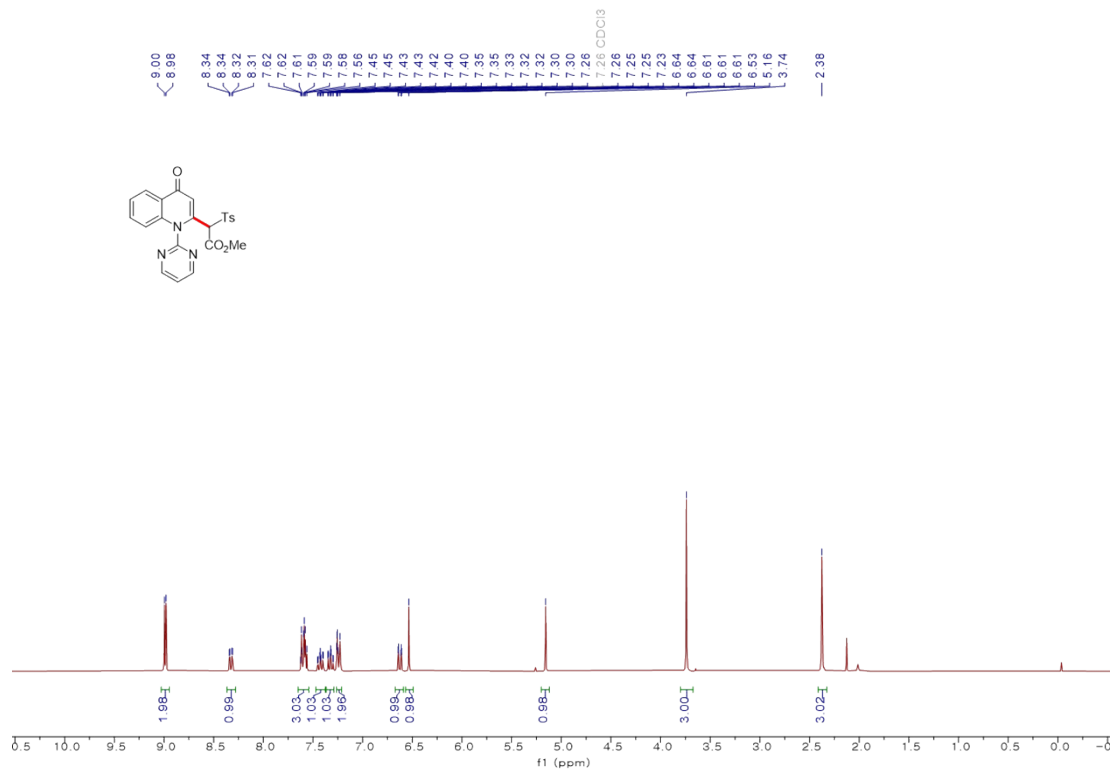

<sup>1</sup>H NMR of **3p** (300 MHz, Chloroform-*d*)

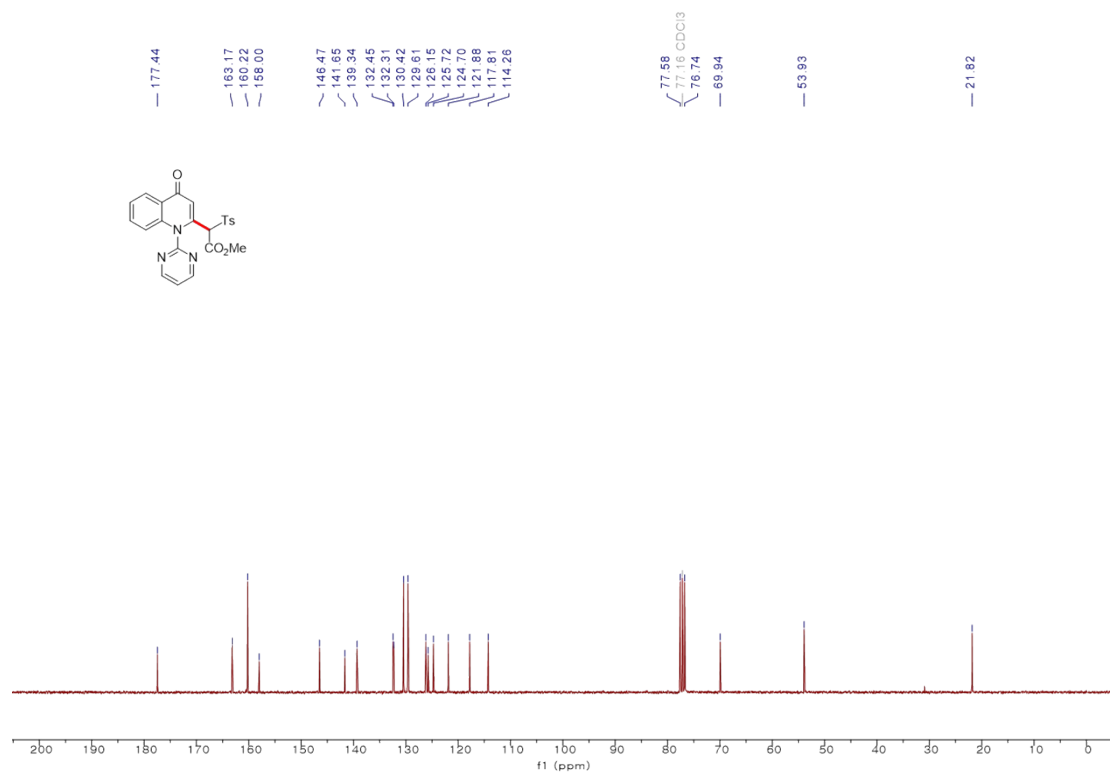

<sup>13</sup>C NMR of **3p** (75 MHz, Chloroform-*d*)

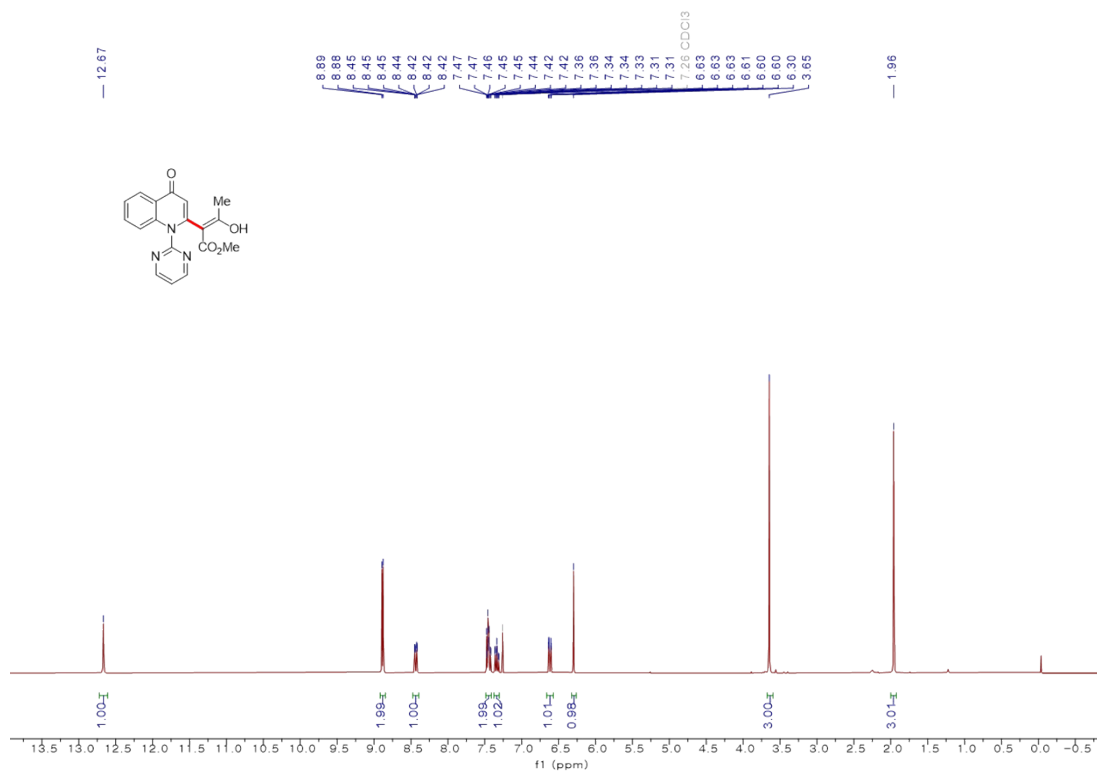

<sup>1</sup>H NMR of **3q** (300 MHz, Chloroform-*d*)

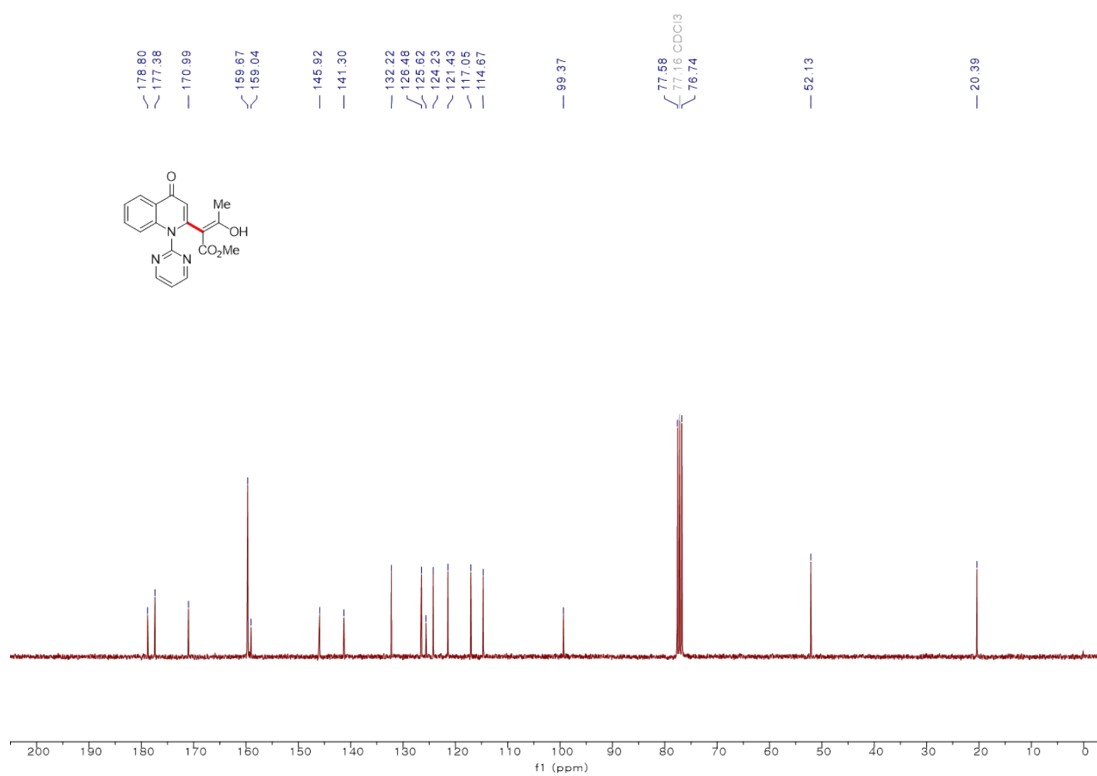

<sup>13</sup>C NMR of **3q** (75 MHz, Chloroform-*d*)

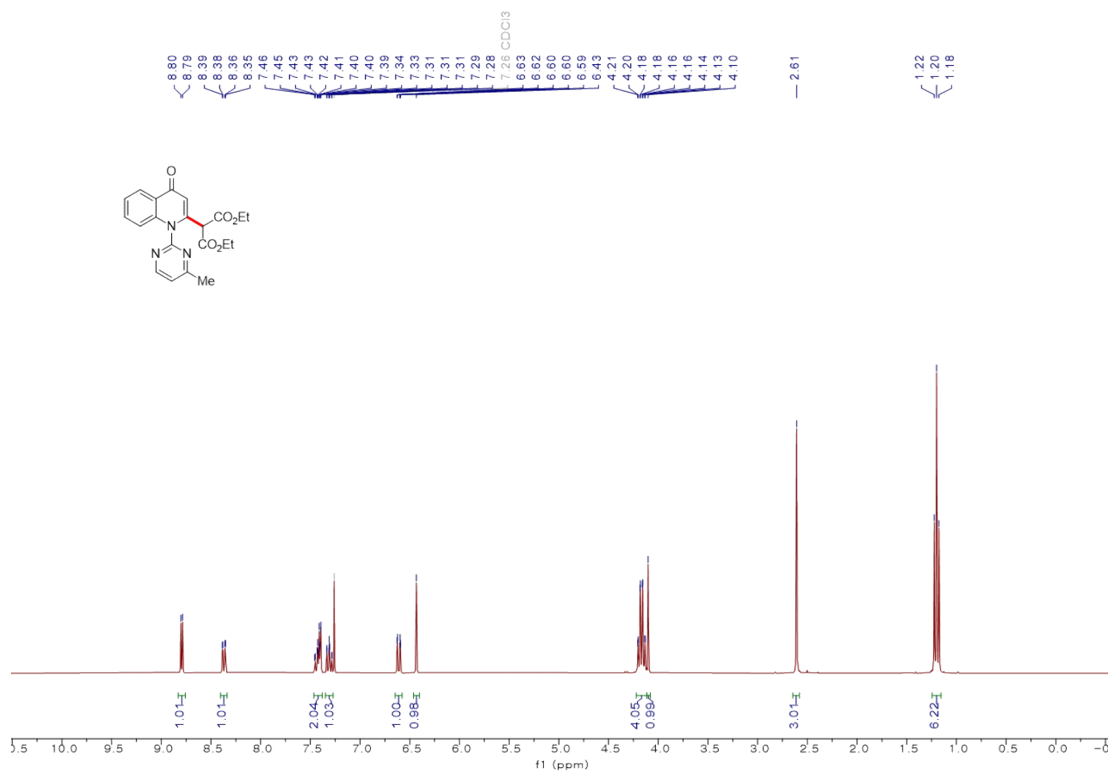

<sup>1</sup>H NMR of **3s** (300 MHz, Chloroform-*d*)

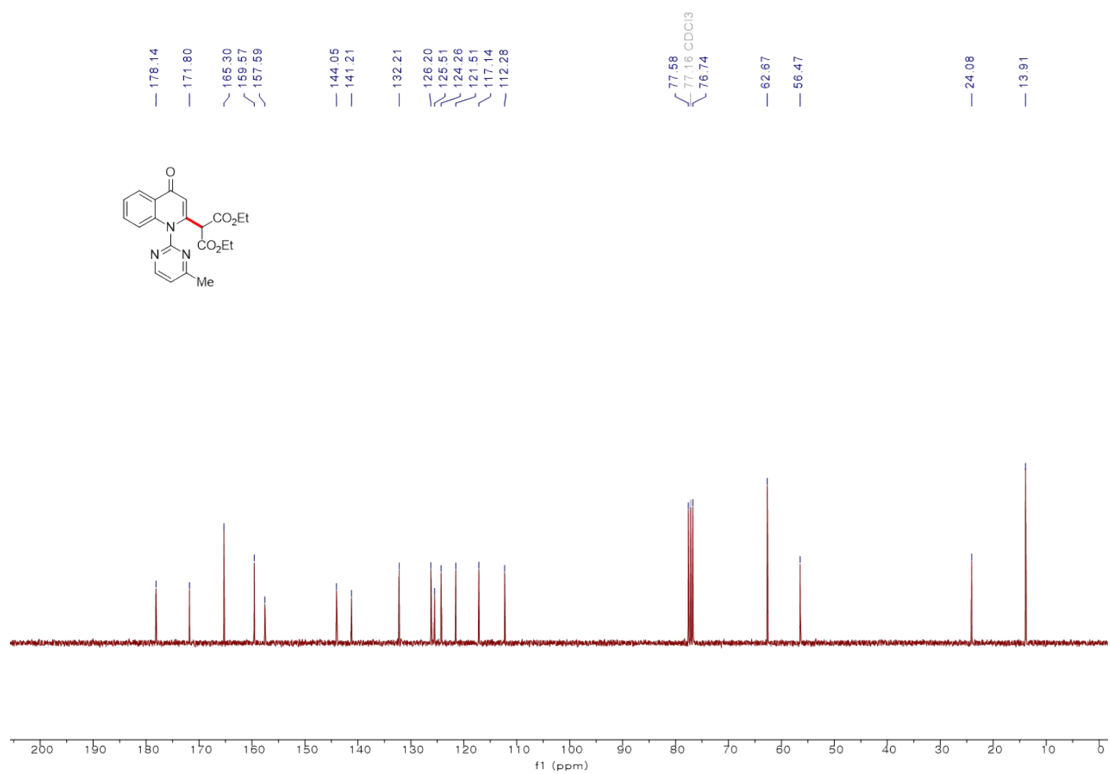

<sup>13</sup>C NMR of **3s** (75 MHz, Chloroform-*d*)

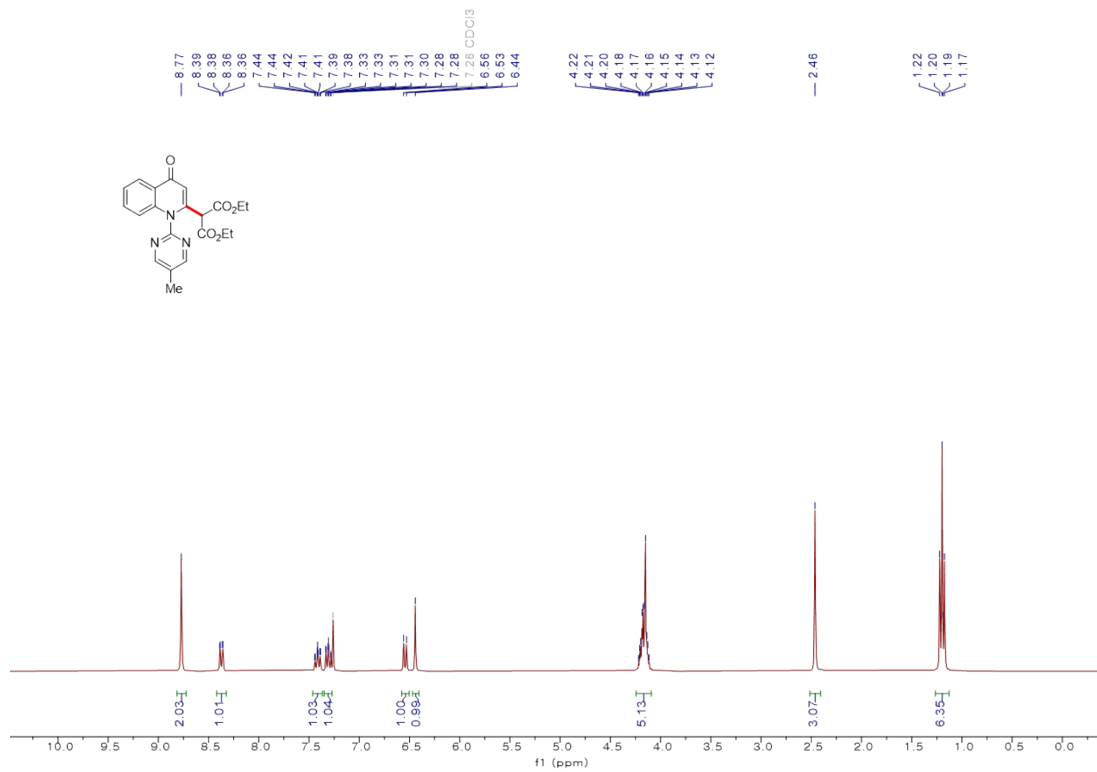

<sup>1</sup>H NMR of **3t** (300 MHz, Chloroform-*d*)

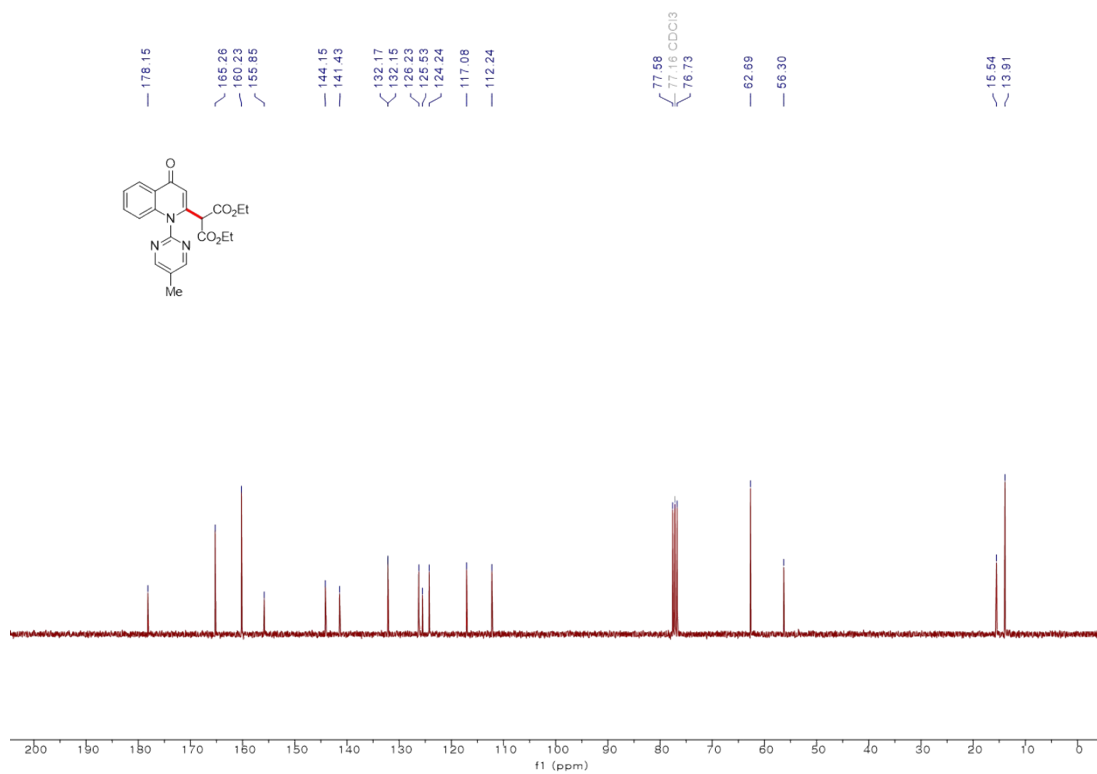

<sup>13</sup>C NMR of **3t** (75 MHz, Chloroform-*d*)

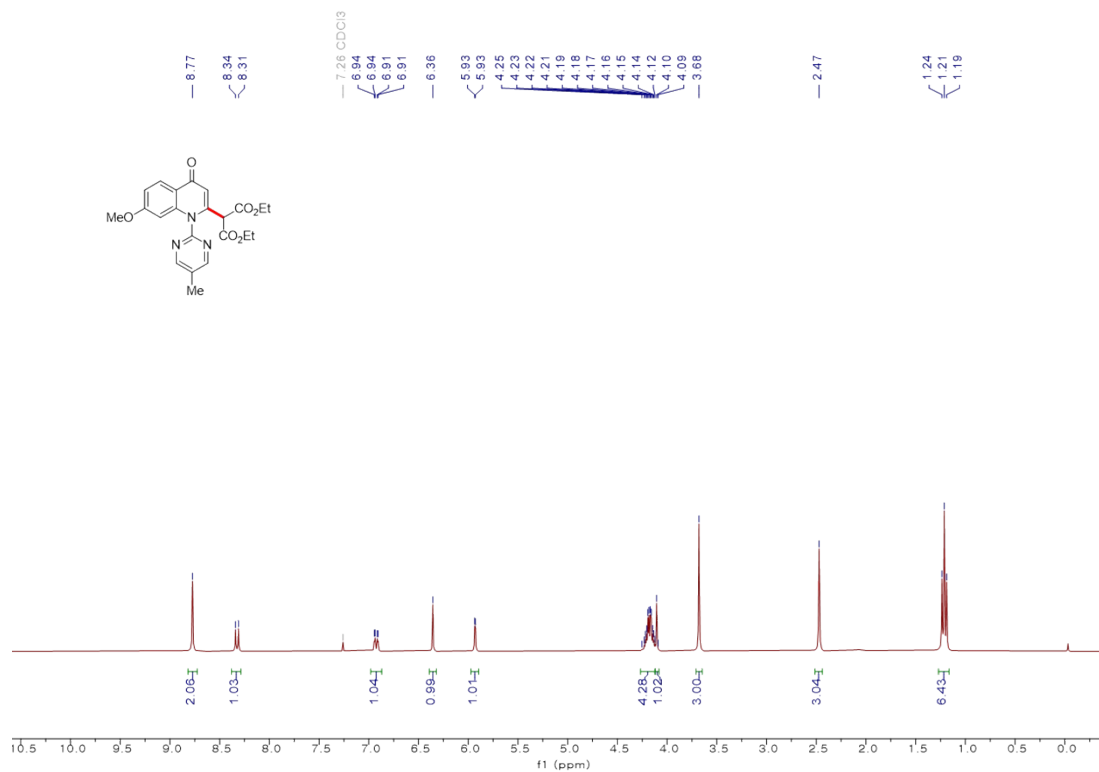

<sup>1</sup>H NMR of **3u** (300 MHz, Chloroform-*d*)

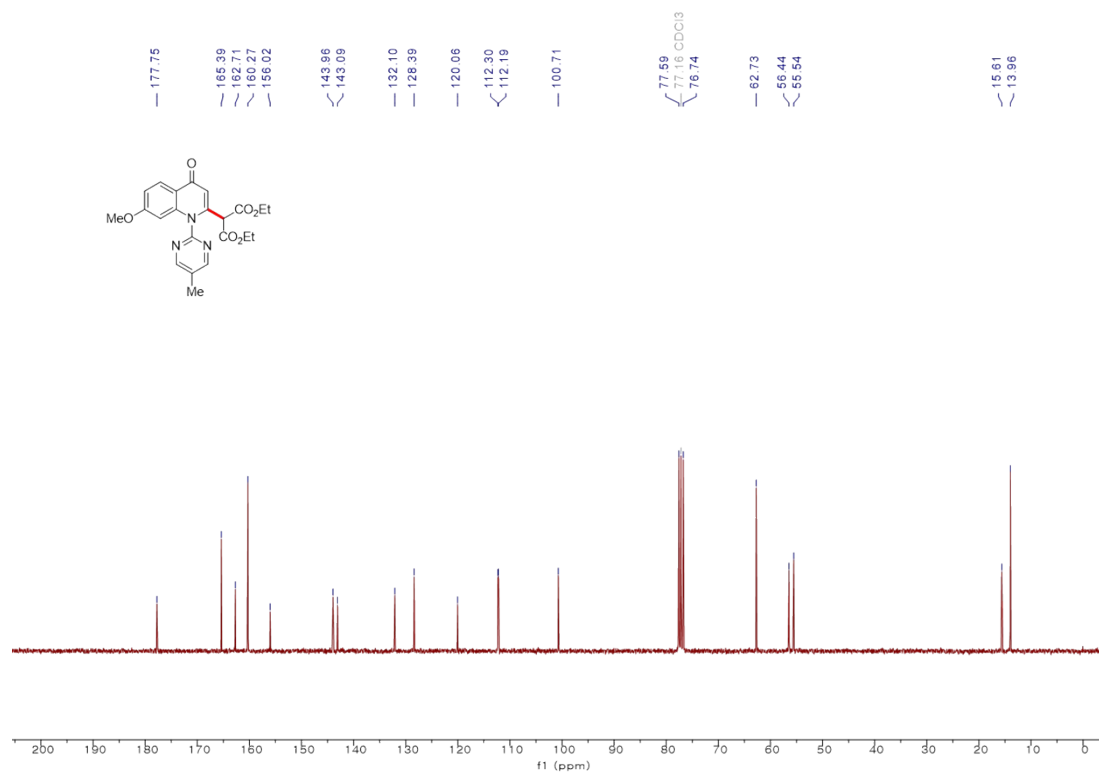

<sup>13</sup>C NMR of **3u** (75 MHz, Chloroform-*d*)





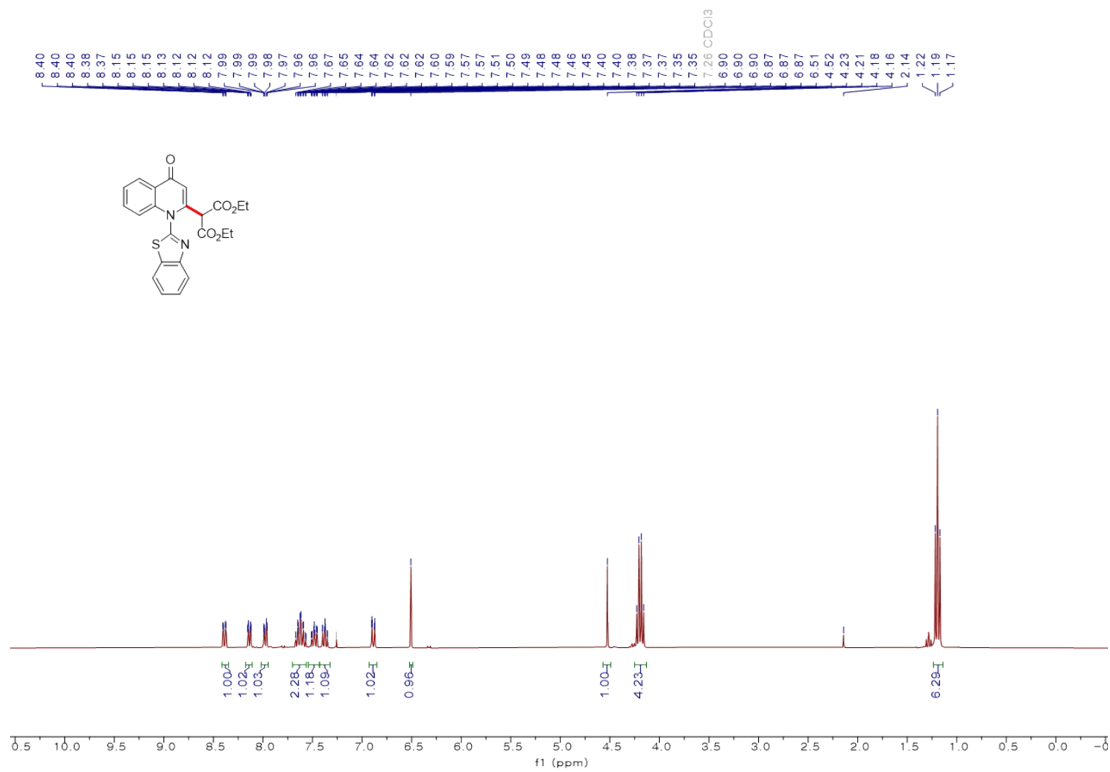

<sup>1</sup>H NMR of **3w** (300 MHz, Chloroform-*d*)

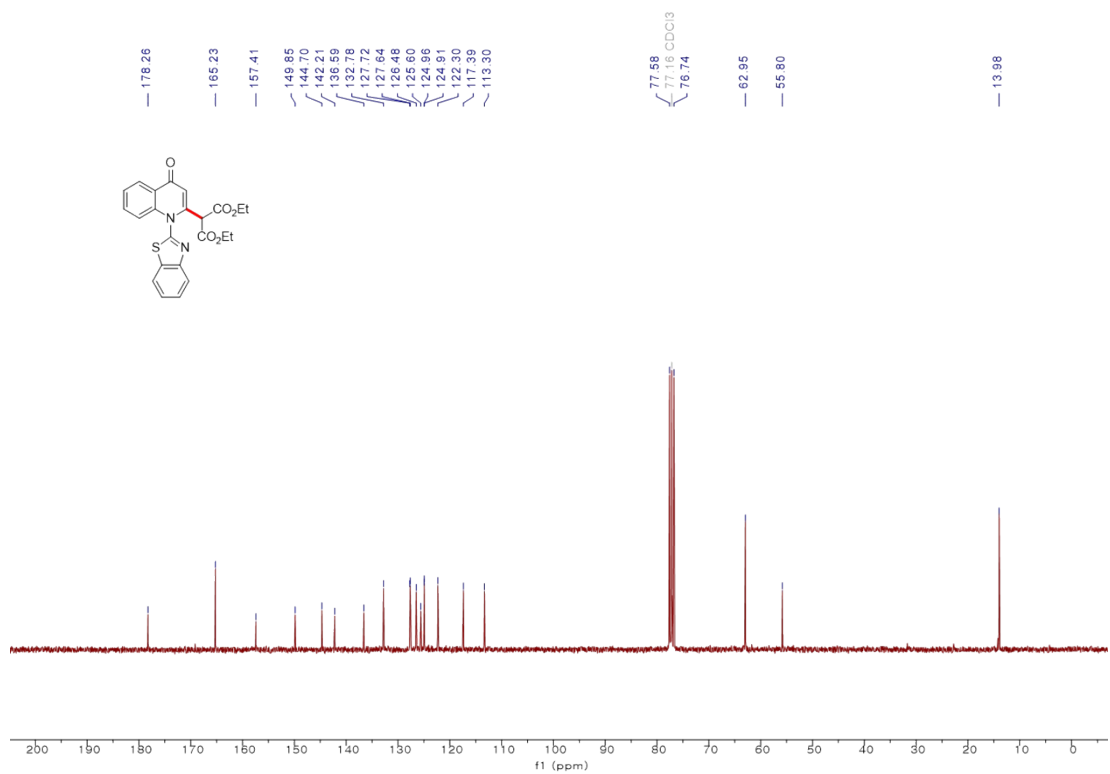

<sup>13</sup>C NMR of **3w** (75 MHz, Chloroform-*d*)

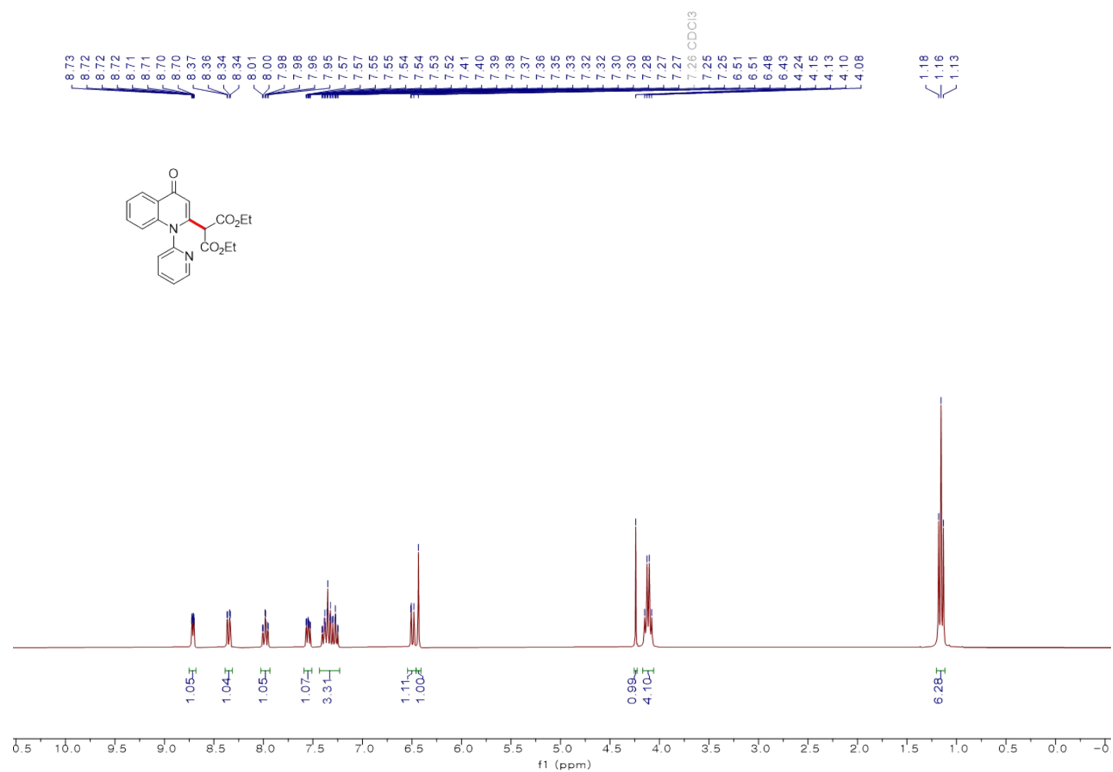

<sup>1</sup>H NMR of **3x** (300 MHz, Chloroform-*d*)

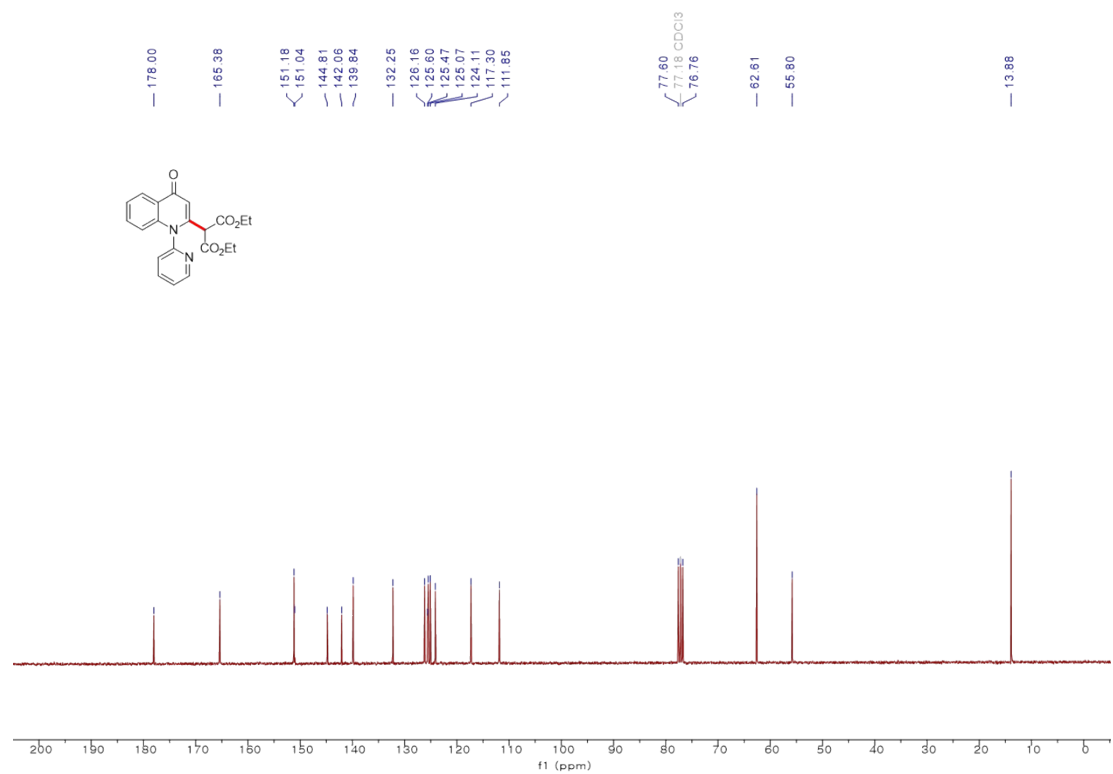

<sup>13</sup>C NMR of **3x** (75 MHz, Chloroform-*d*)

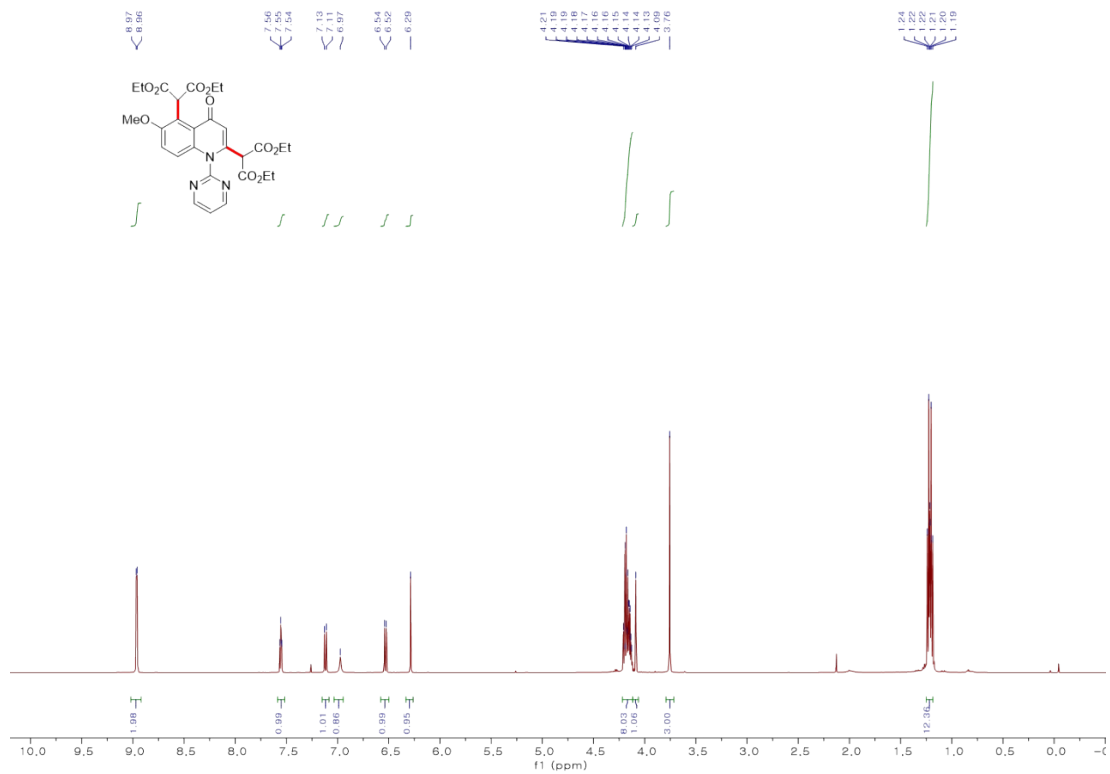

<sup>1</sup>H NMR of 3y (500 MHz, Chloroform-*d*)

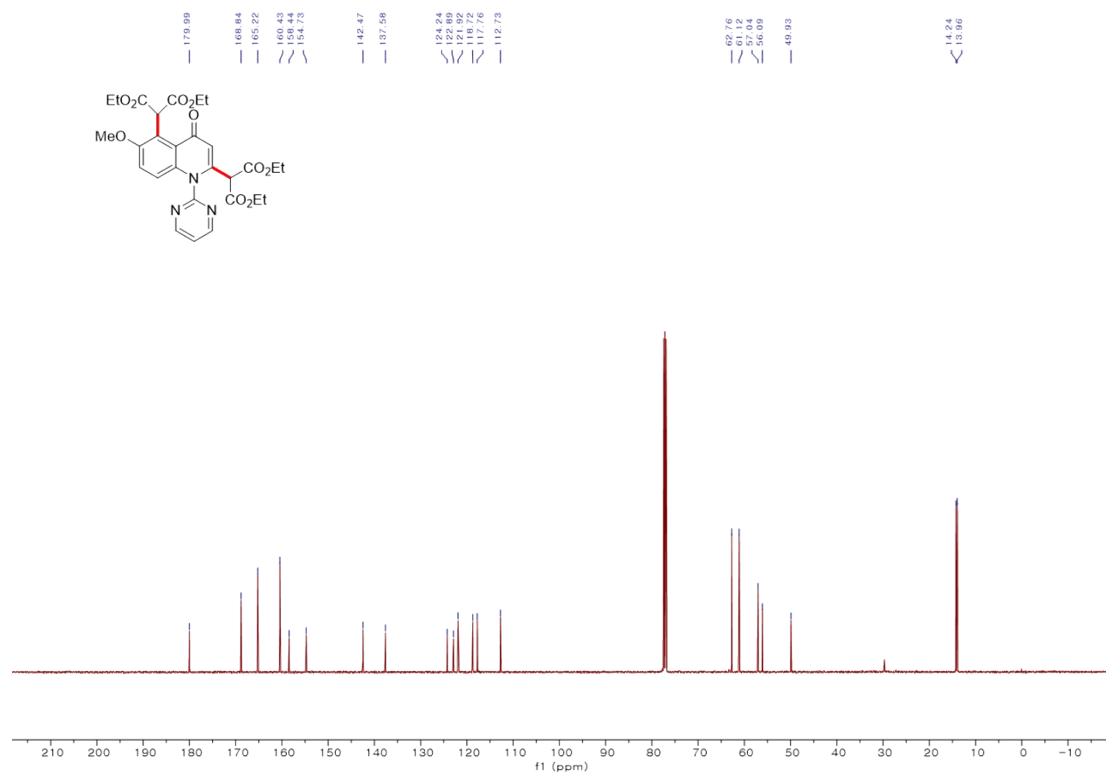

<sup>13</sup>C NMR of 3y (126 MHz, Chloroform-*d*)

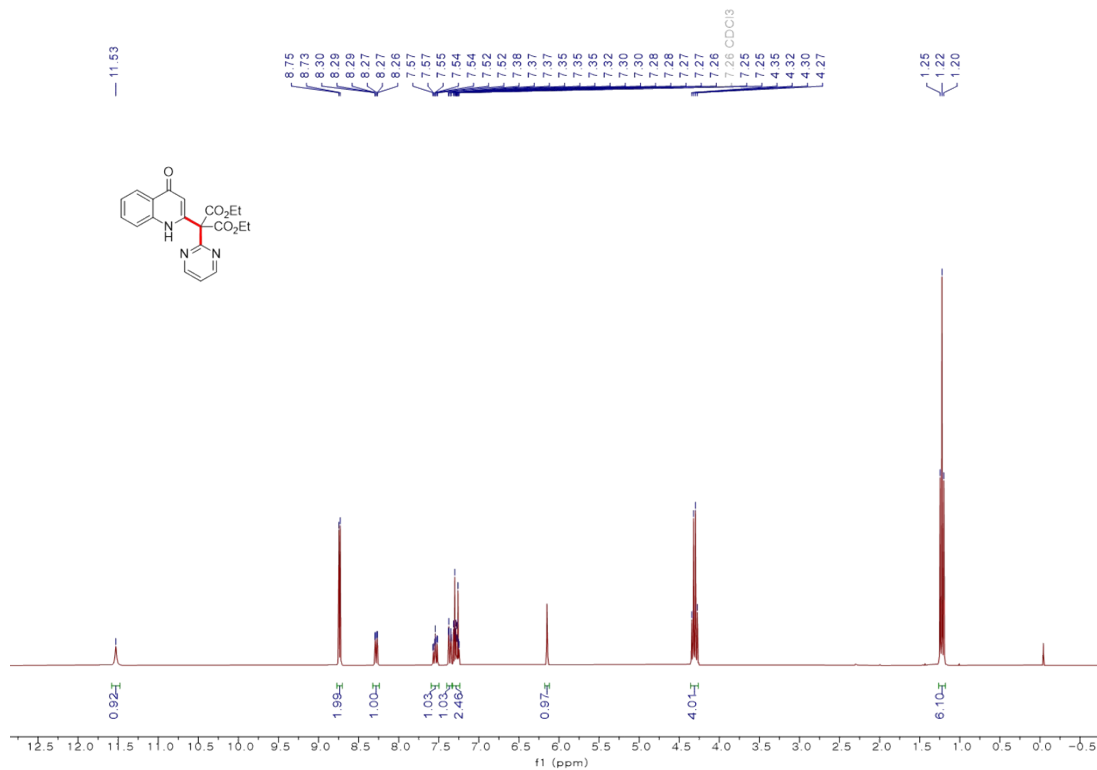

<sup>1</sup>H NMR of **4a** (300 MHz, Chloroform-*d*)

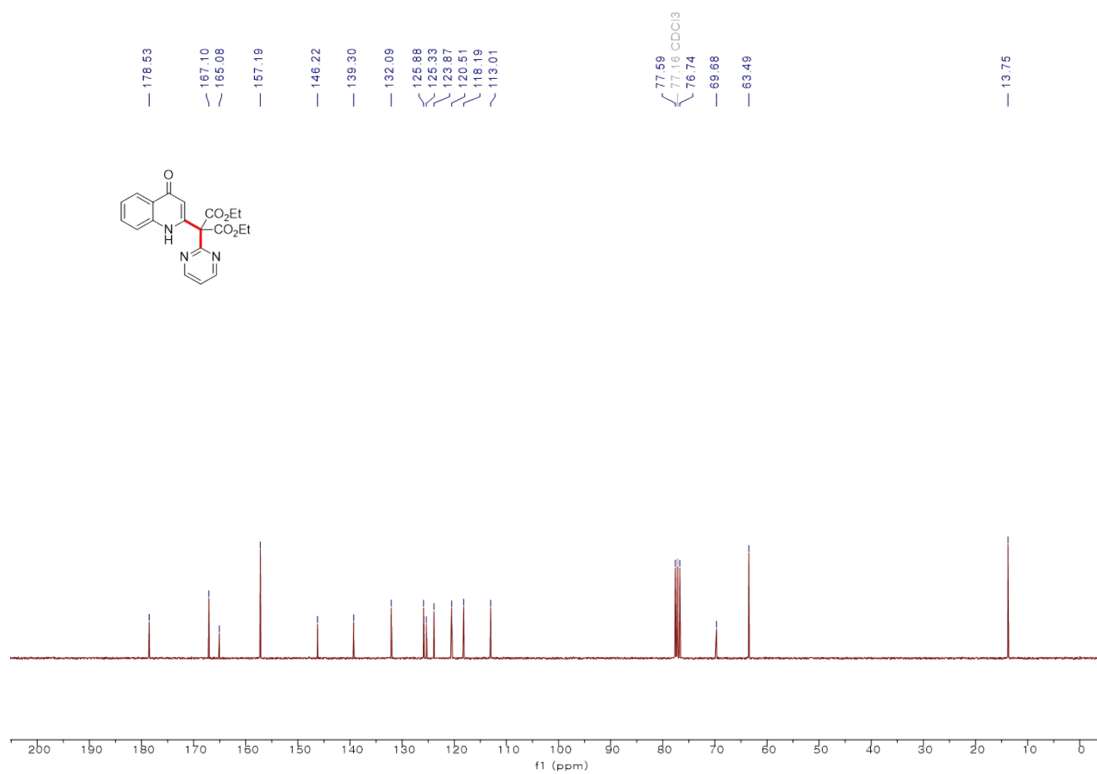

<sup>13</sup>C NMR of **4a** (75 MHz, Chloroform-*d*)

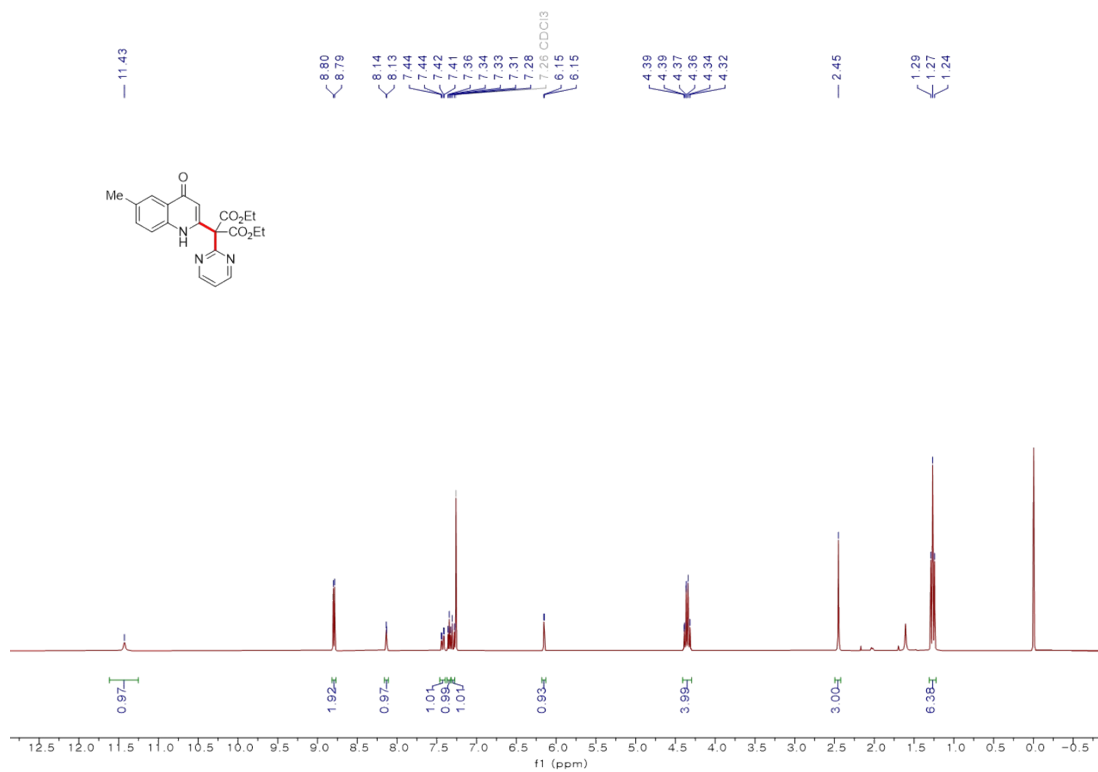

<sup>1</sup>H NMR of **4b** (300 MHz, Chloroform-*d*)

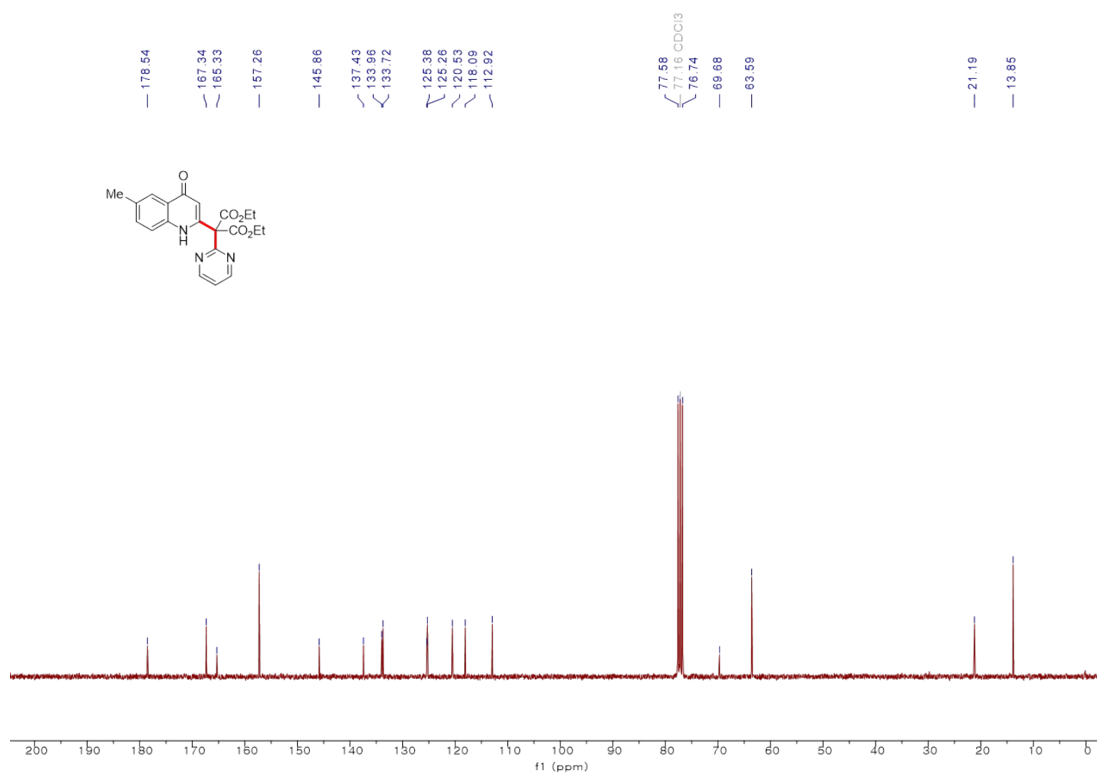

<sup>13</sup>C NMR of **4b** (75 MHz, Chloroform-*d*)

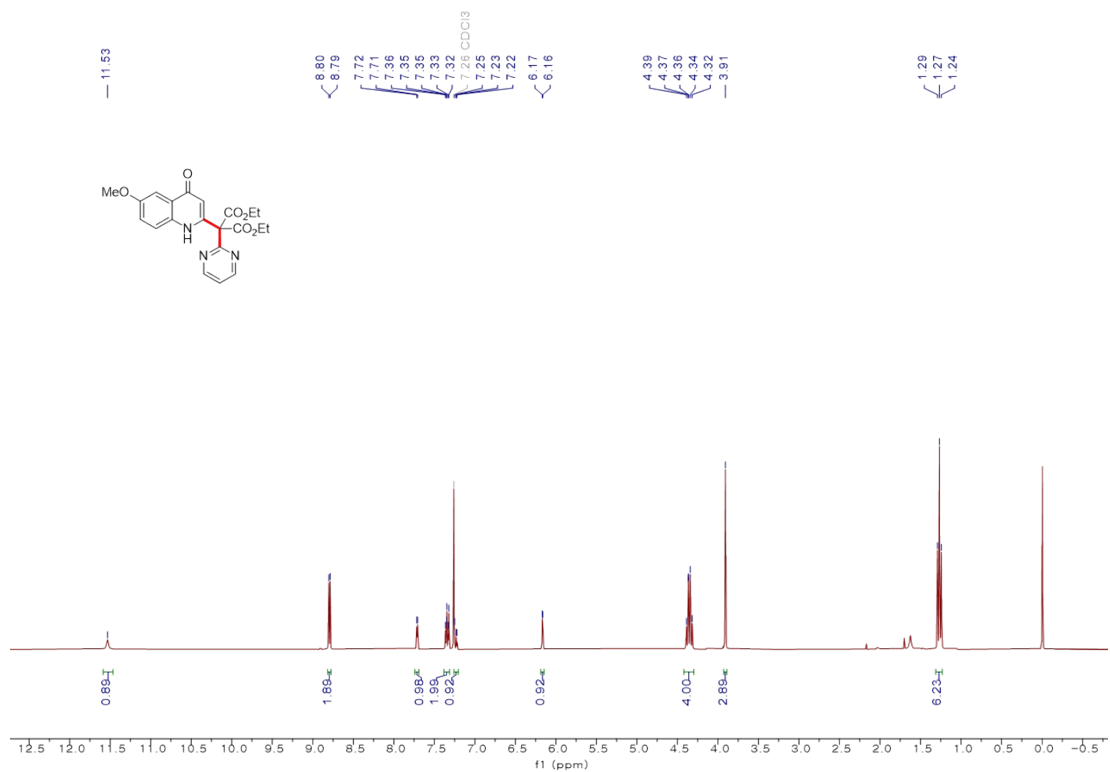

<sup>1</sup>H NMR of **4c** (300 MHz, Chloroform-*d*)

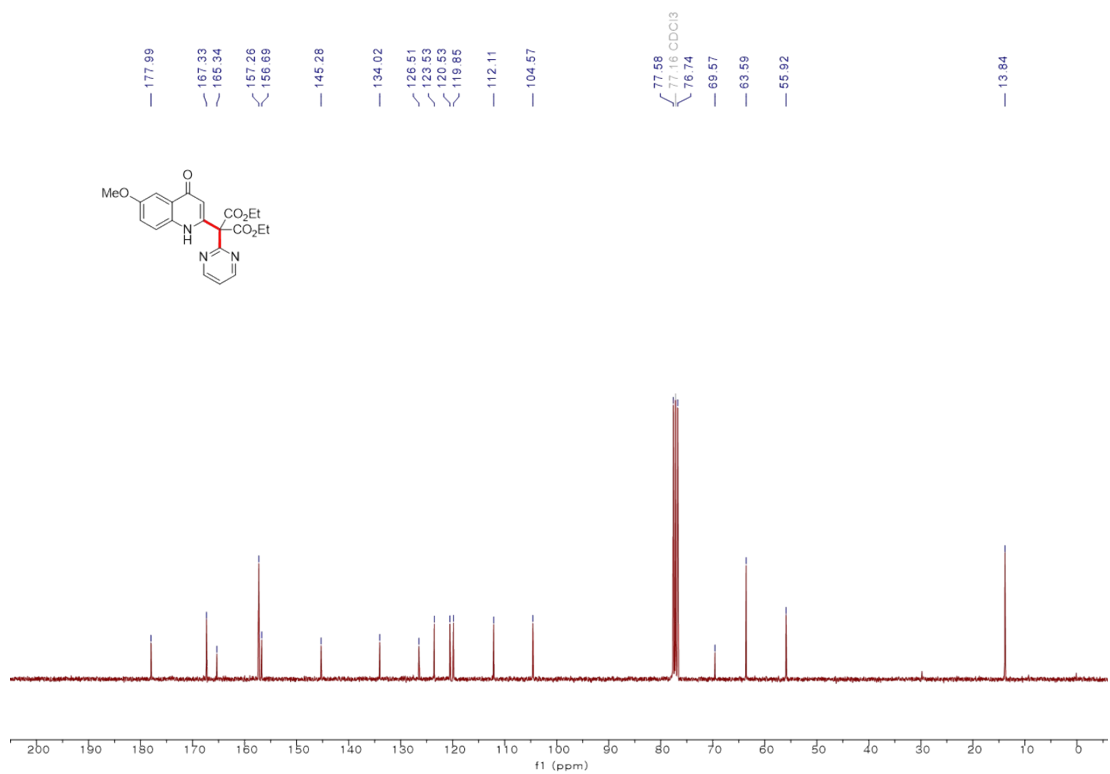

<sup>13</sup>C NMR of **4c** (75 MHz, Chloroform-*d*)

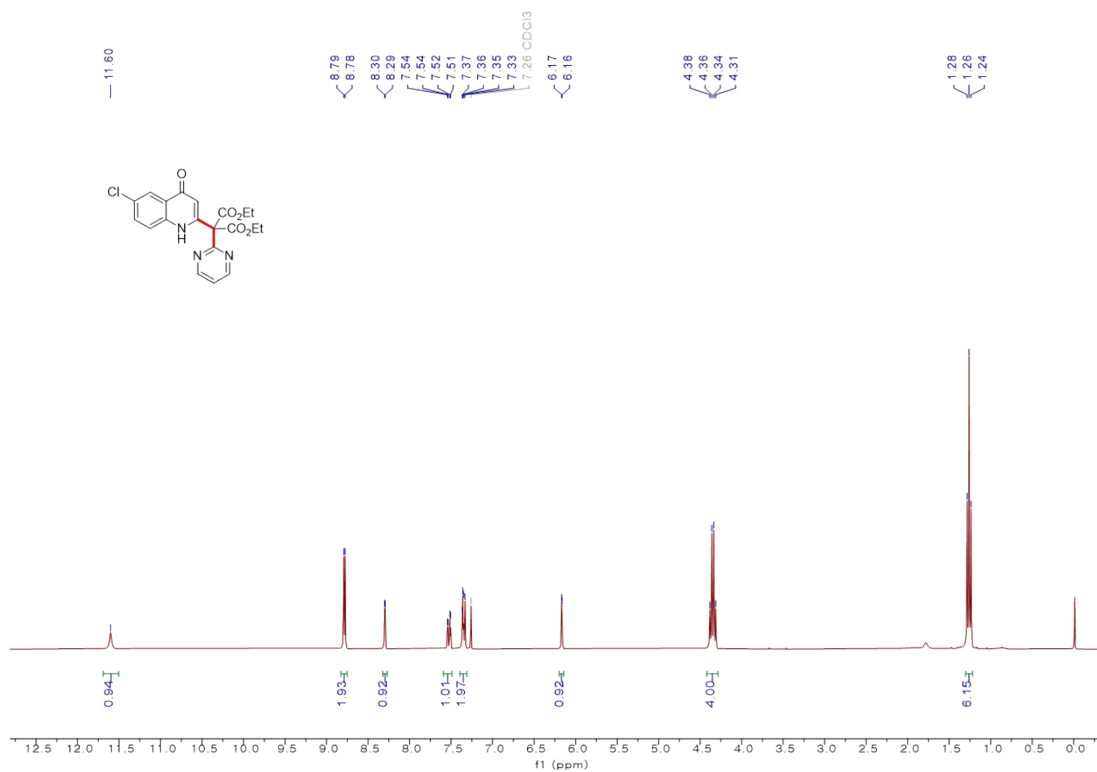

<sup>1</sup>H NMR of **4d** (300 MHz, Chloroform-*d*)

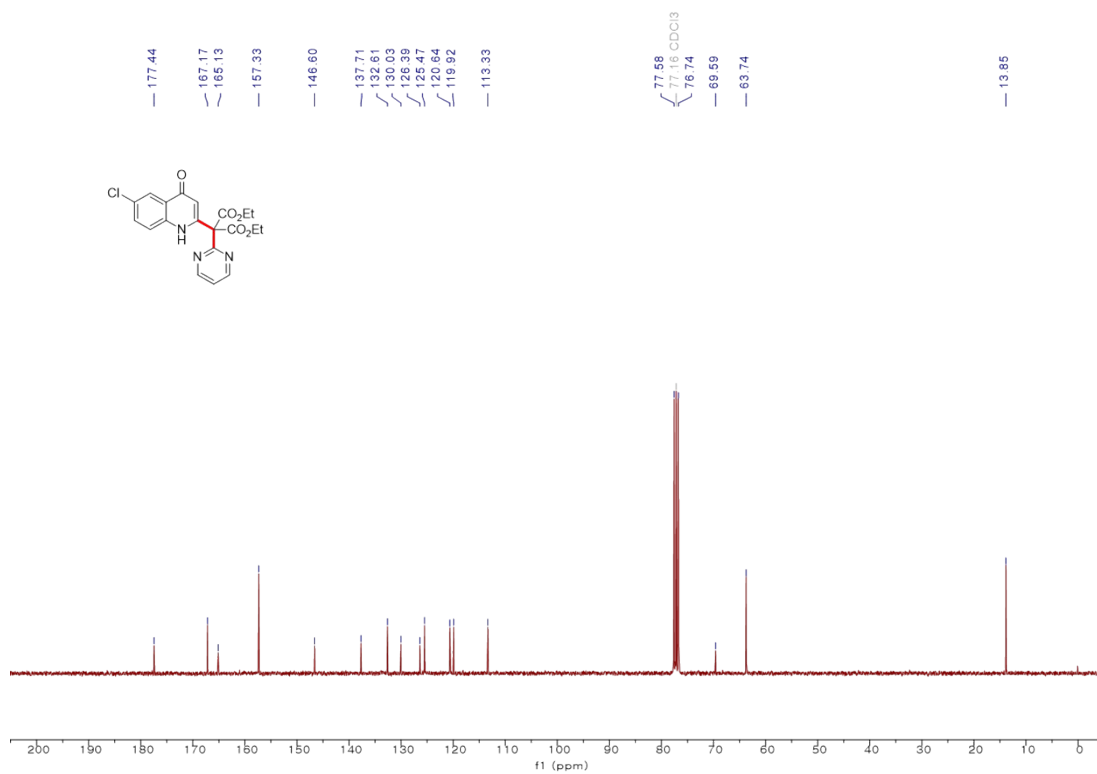

<sup>13</sup>C NMR of **4d** (75 MHz, Chloroform-*d*)

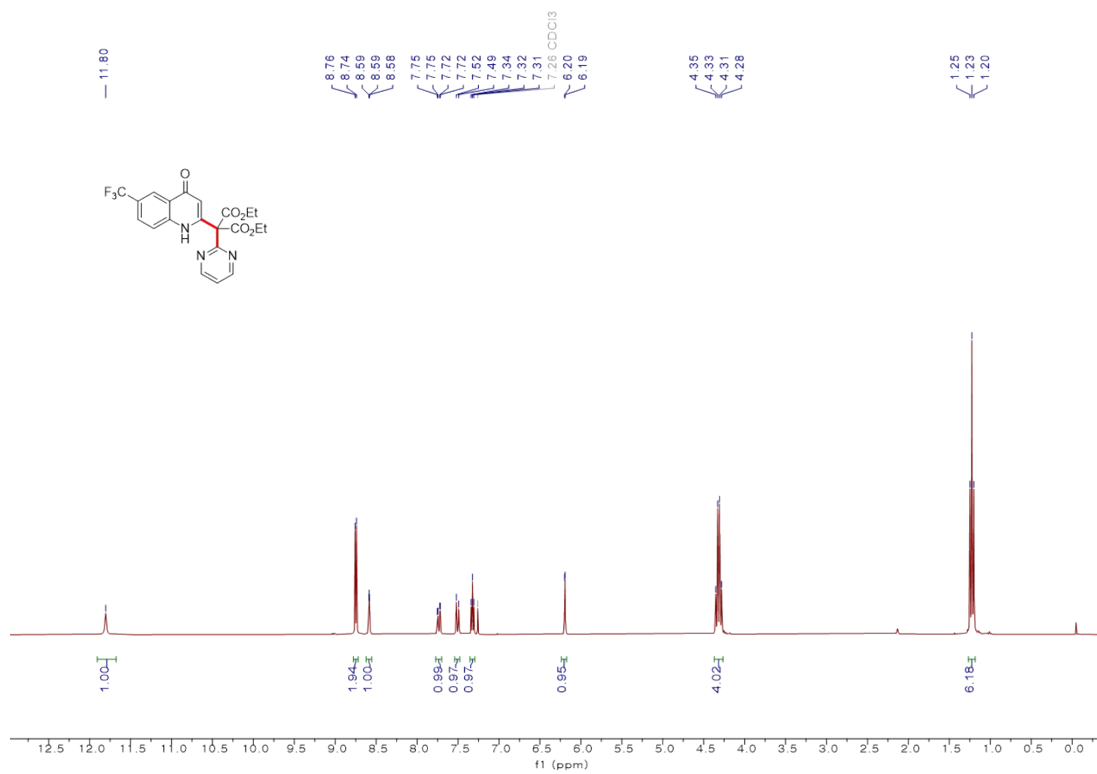

<sup>1</sup>H NMR of **4e** (300 MHz, Chloroform-*d*)

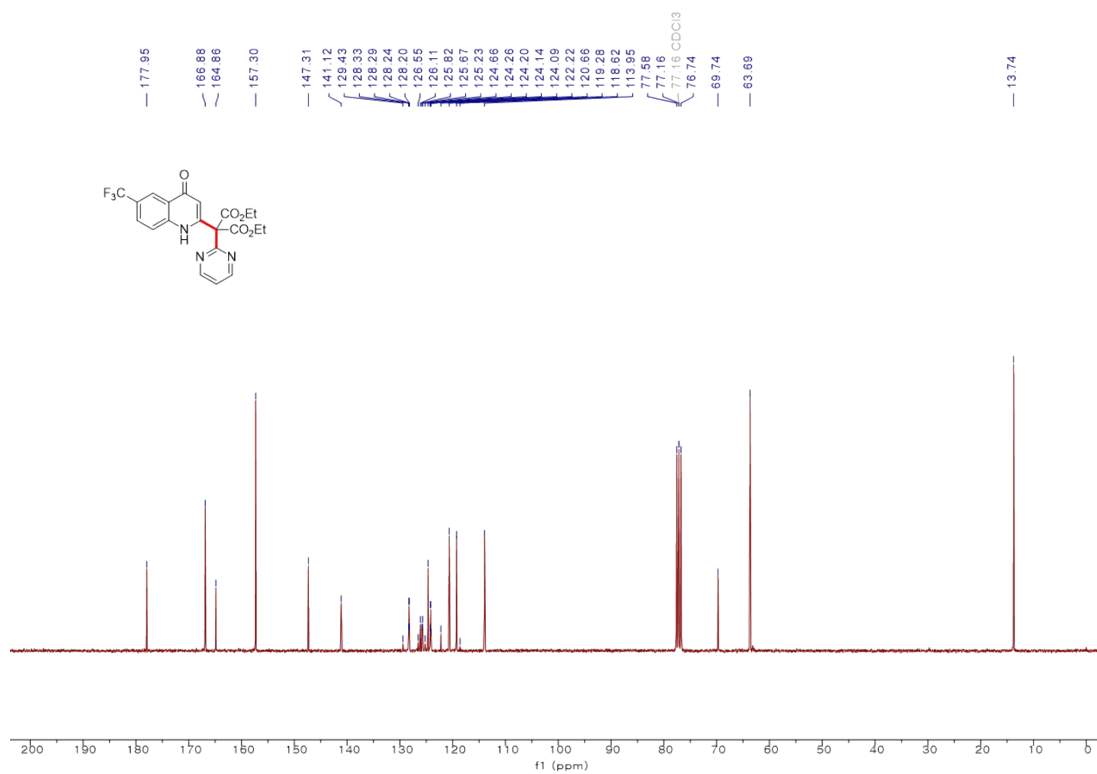

<sup>13</sup>C NMR of **4e** (75 MHz, Chloroform-*d*)



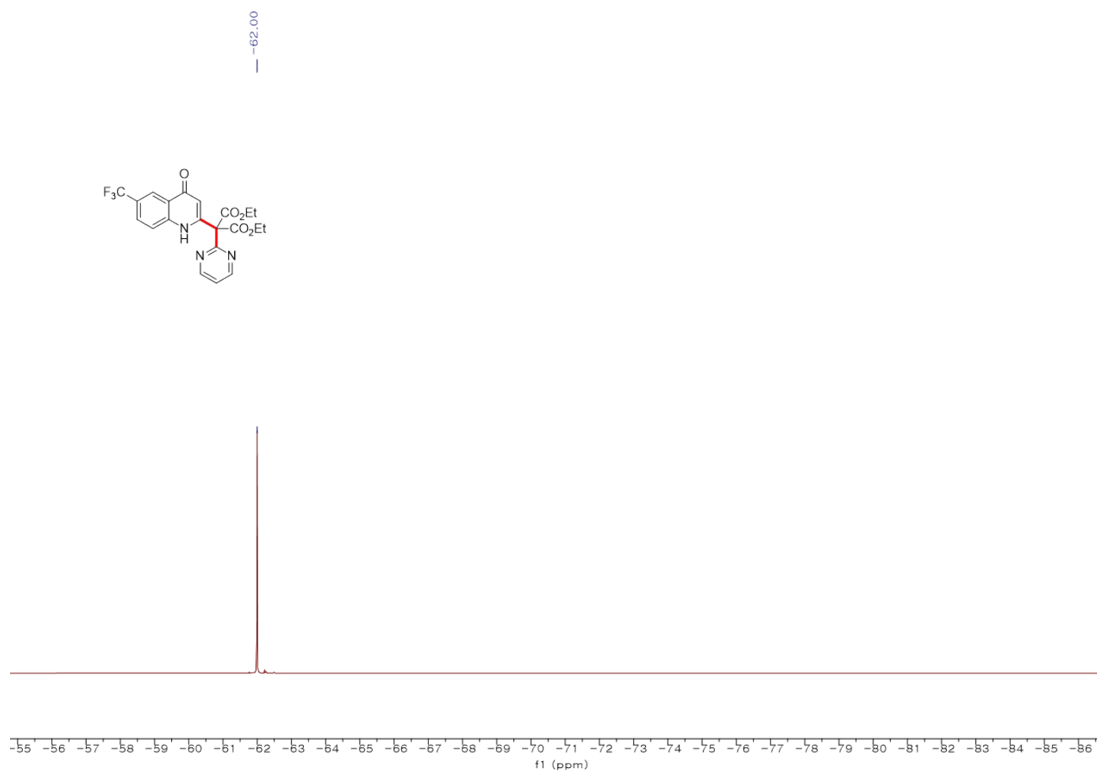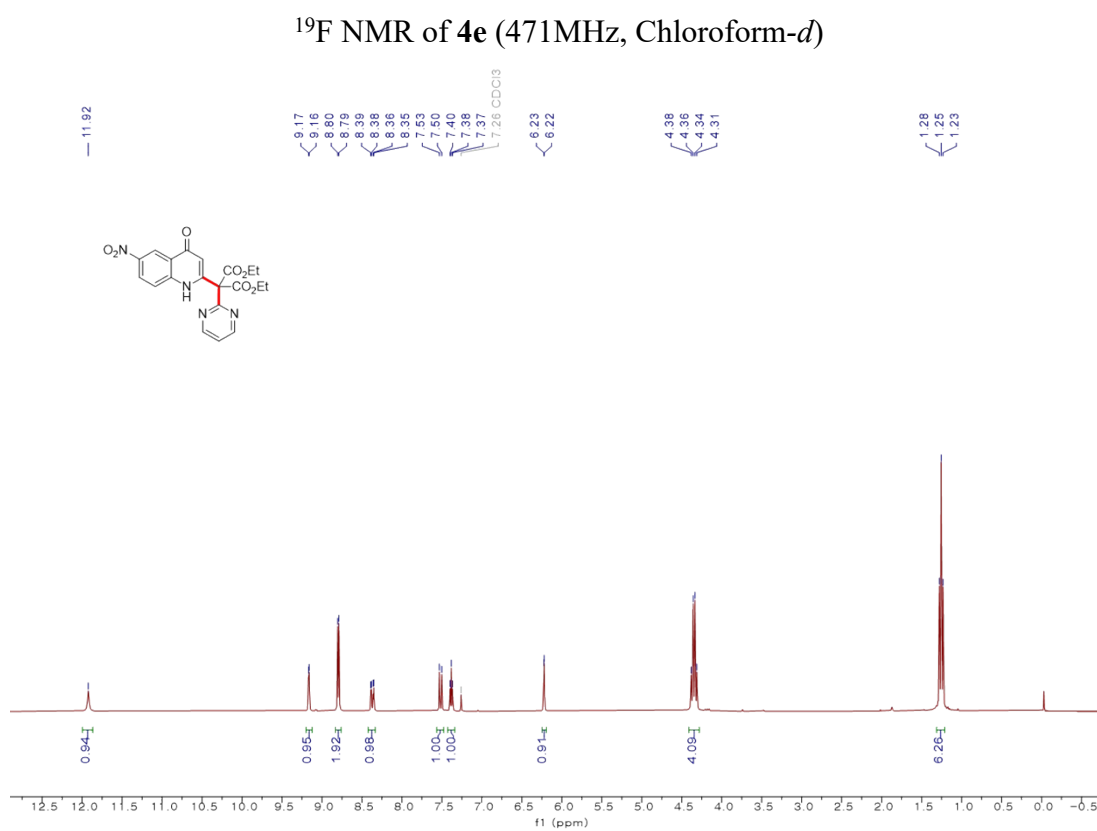

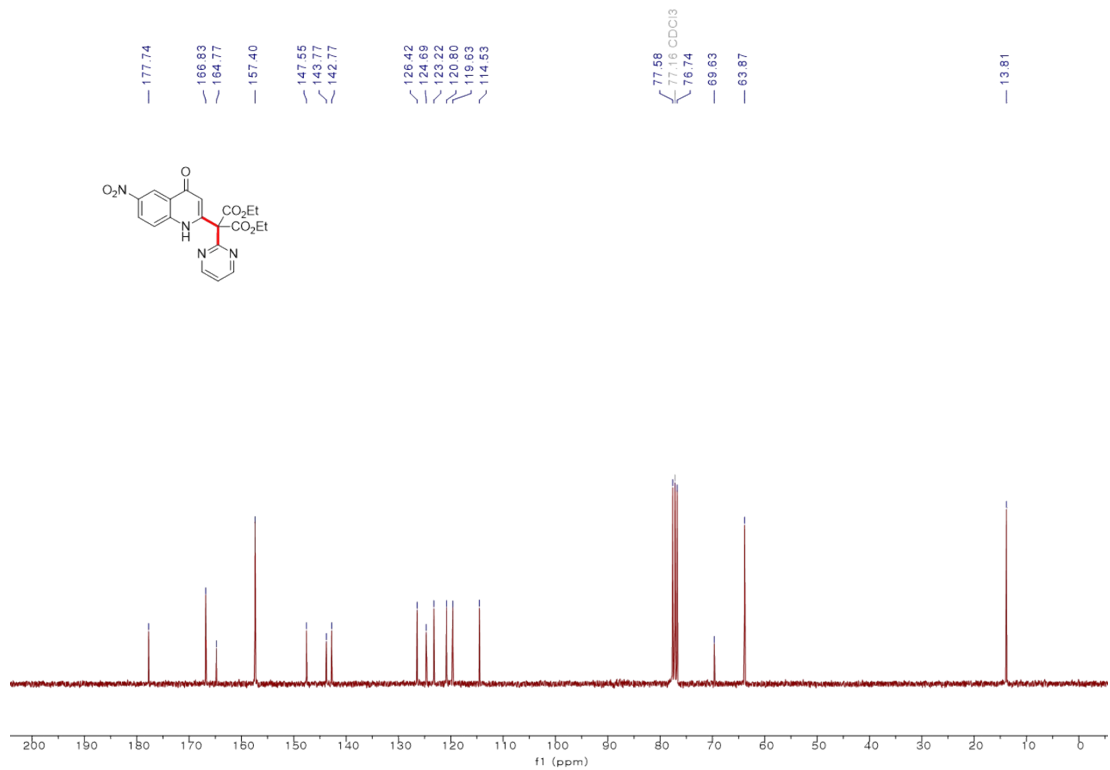

<sup>13</sup>C NMR of **4f** (75 MHz, Chloroform-*d*)

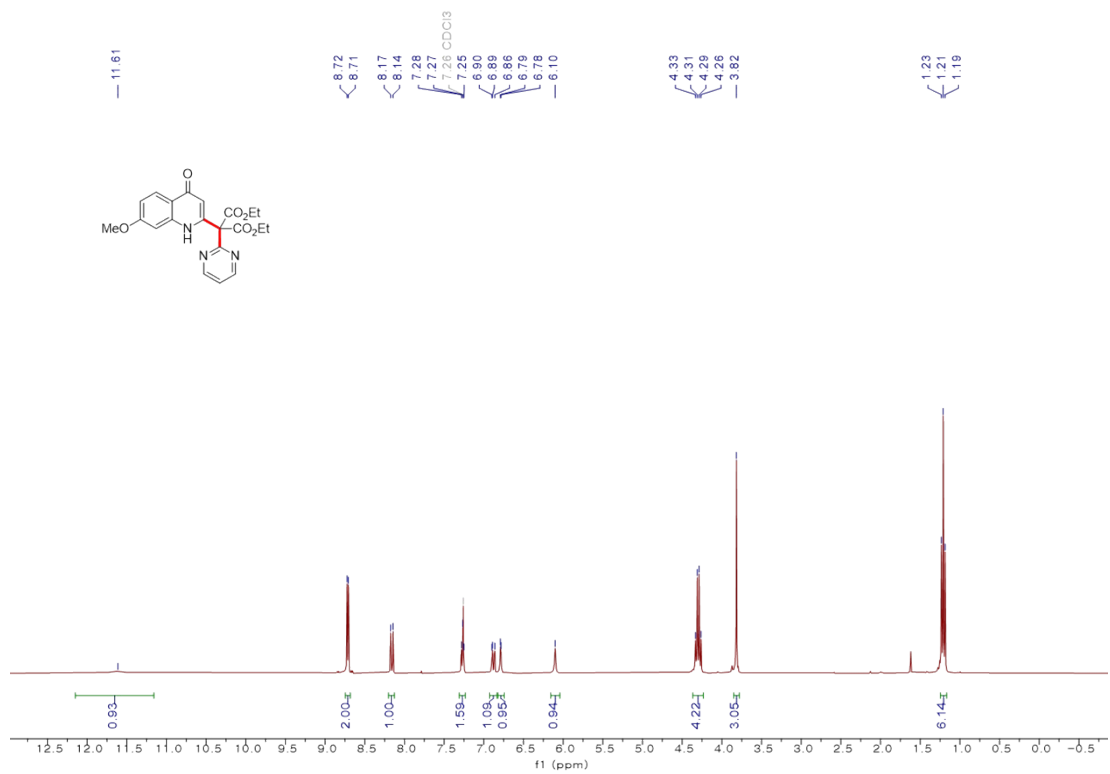

<sup>1</sup>H NMR of **4g** (300 MHz, Chloroform-*d*)

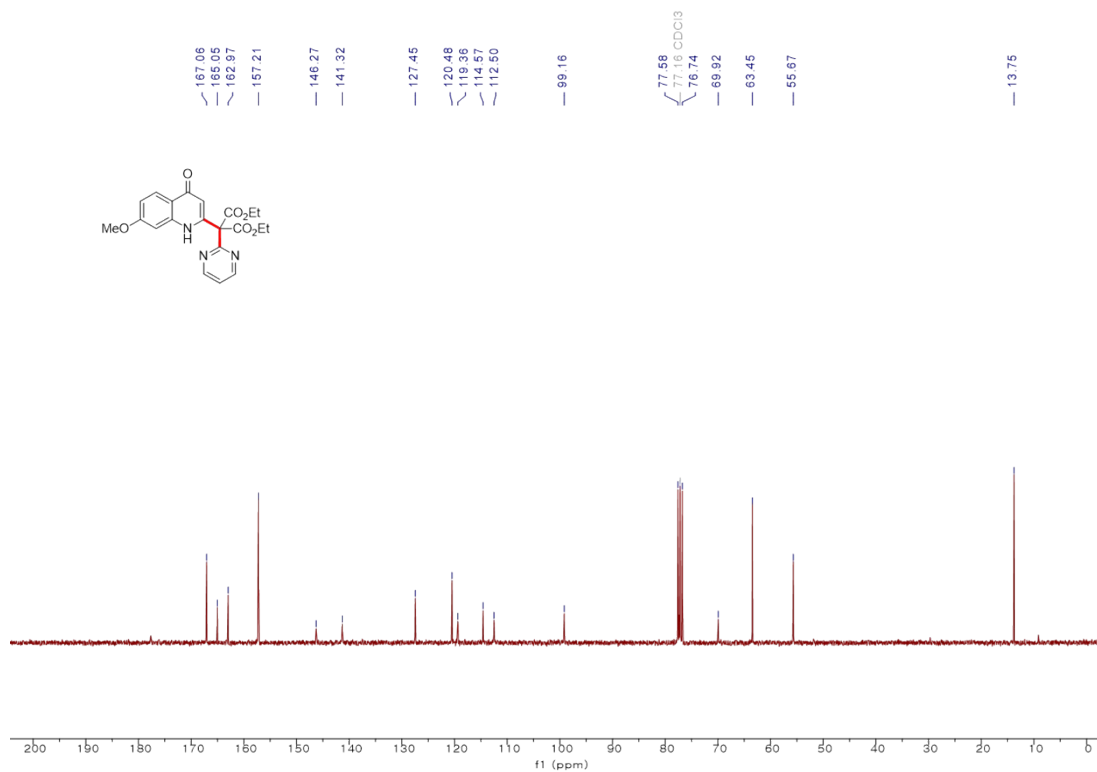

<sup>13</sup>C NMR of **4g** (75 MHz, Chloroform-*d*)

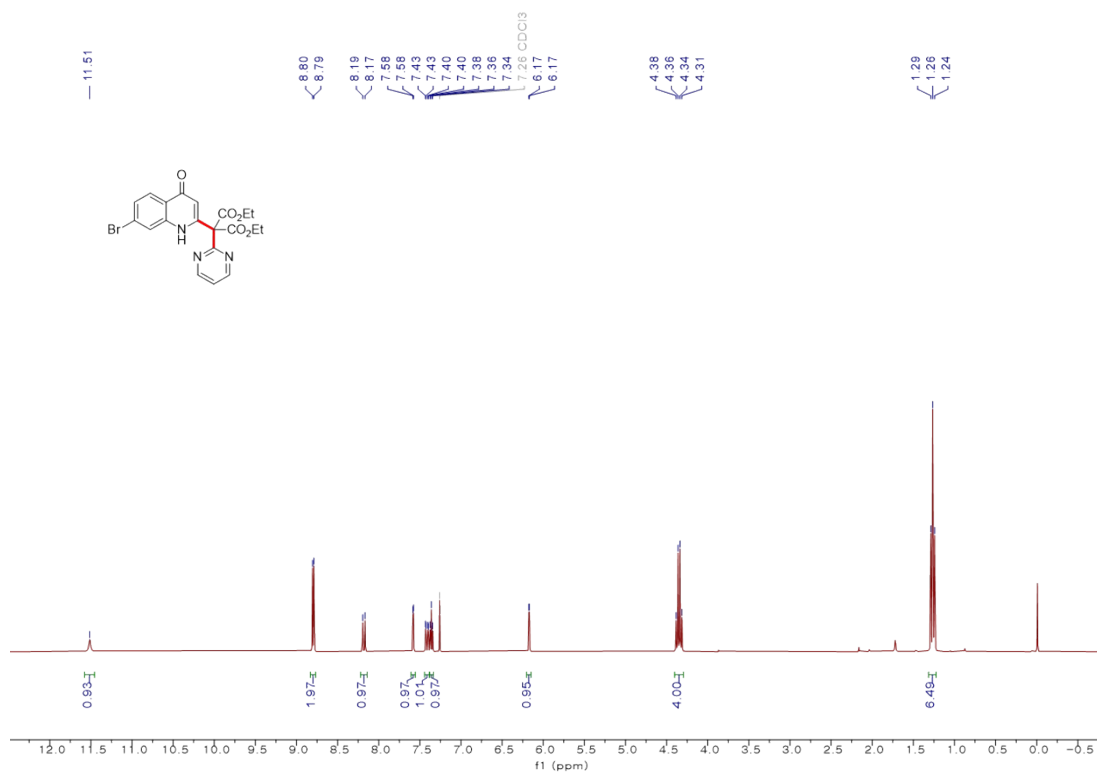

<sup>1</sup>H NMR of **4h** (300 MHz, Chloroform-*d*)

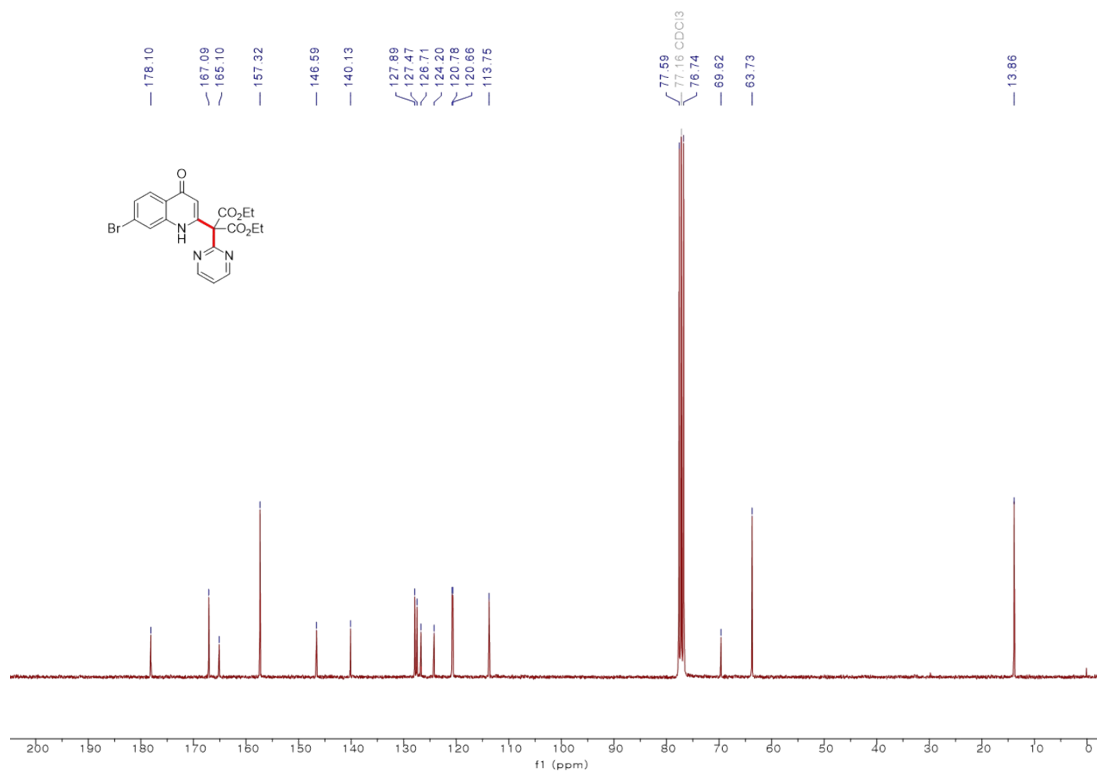

<sup>13</sup>C NMR of **4h** (75 MHz, Chloroform-*d*)

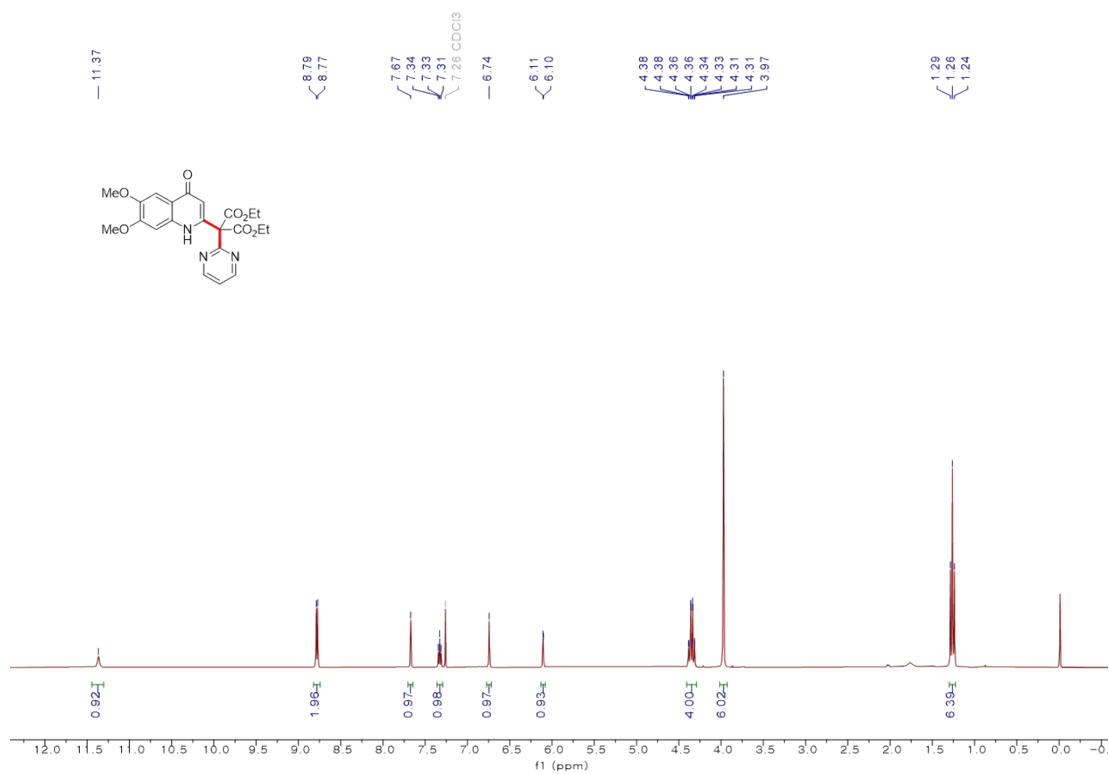

<sup>1</sup>H NMR of **4j** (300 MHz, Chloroform-*d*)

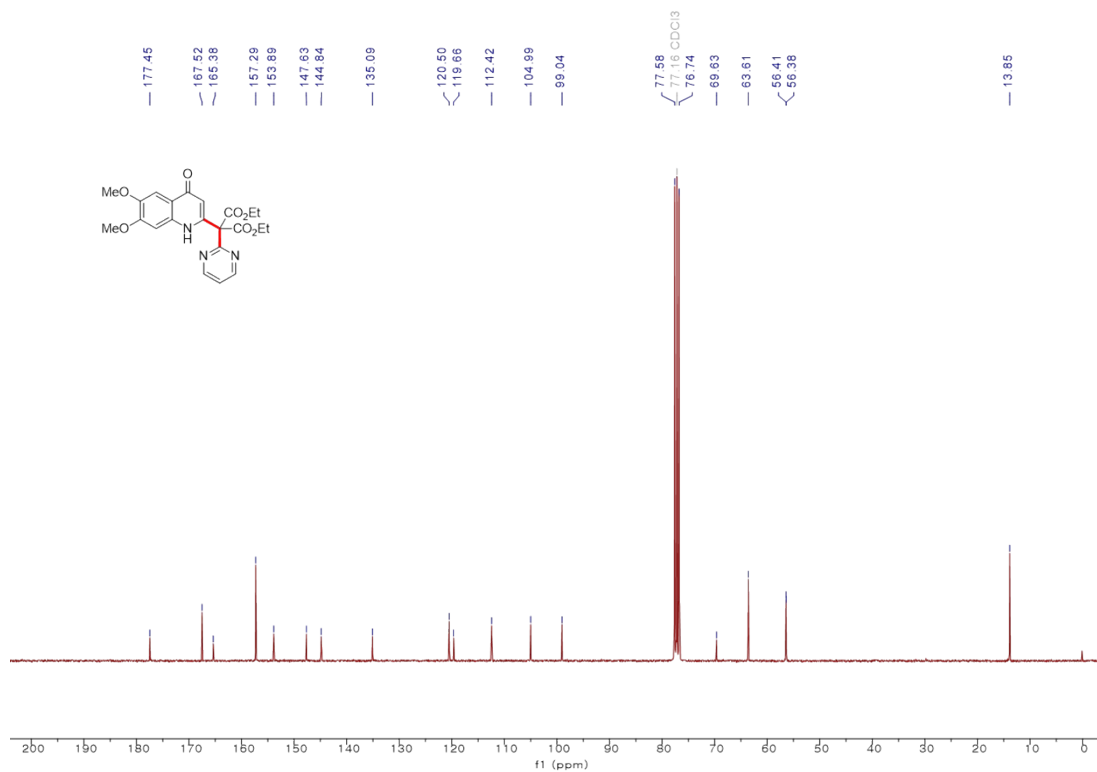

<sup>13</sup>C NMR of **4j** (75 MHz, Chloroform-*d*)

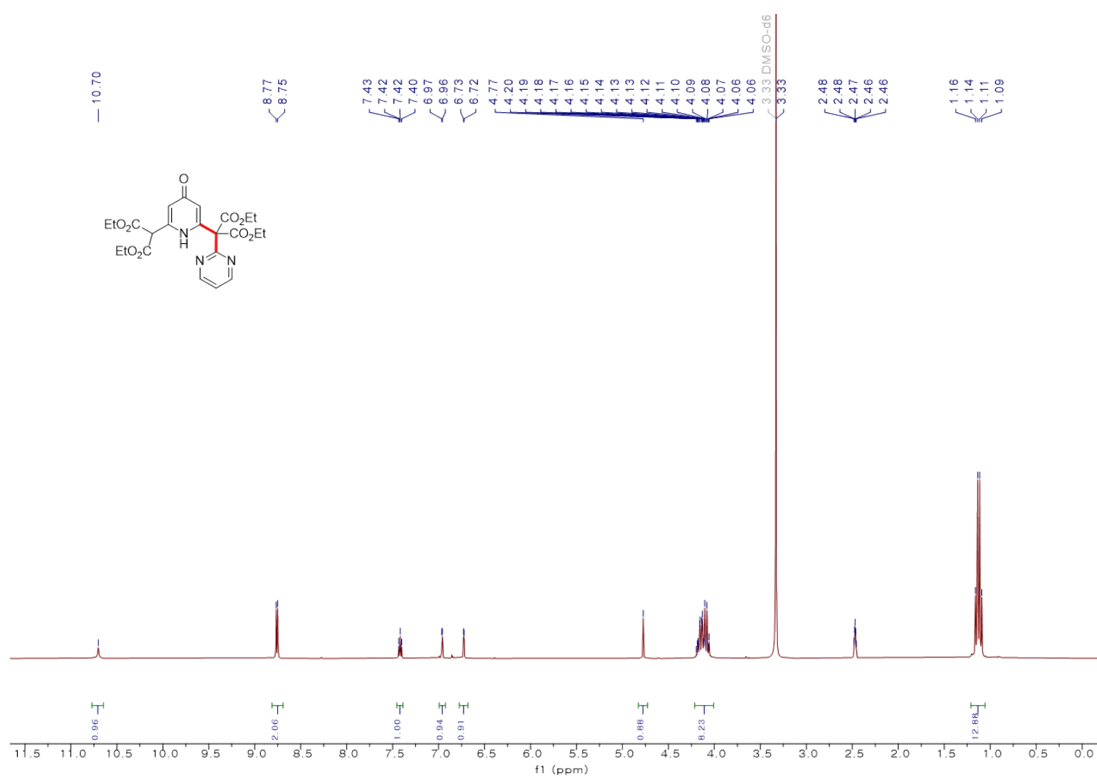

<sup>1</sup>H NMR of **4k** (300 MHz, DMSO-*d*<sub>6</sub>)

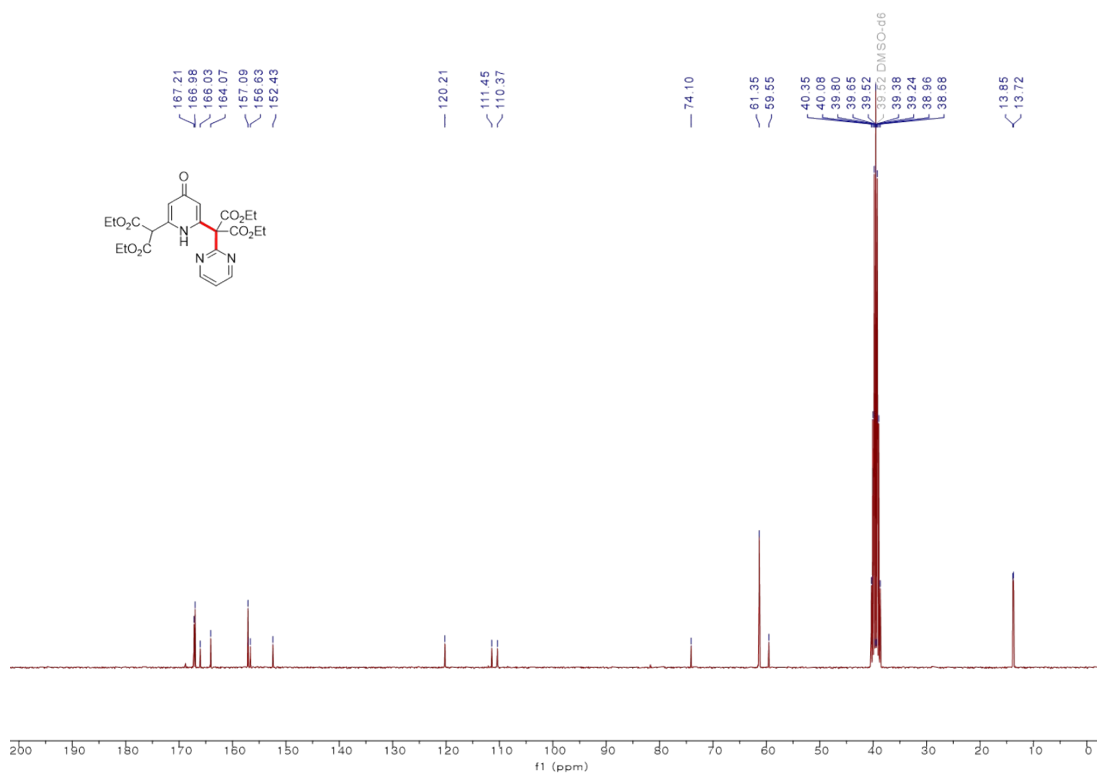

**<sup>13</sup>C NMR of 4k (75 MHz, DMSO-*d*<sub>6</sub>)**

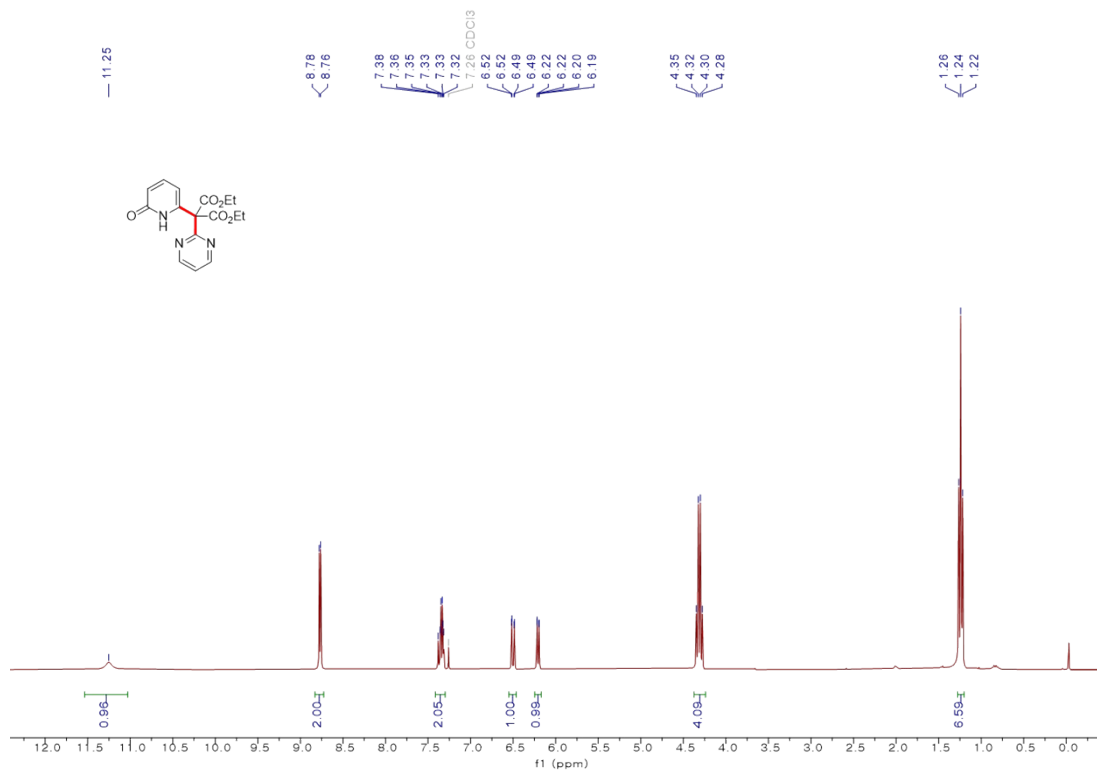

**<sup>1</sup>H NMR of 4l (300 MHz, Chloroform-*d*)**

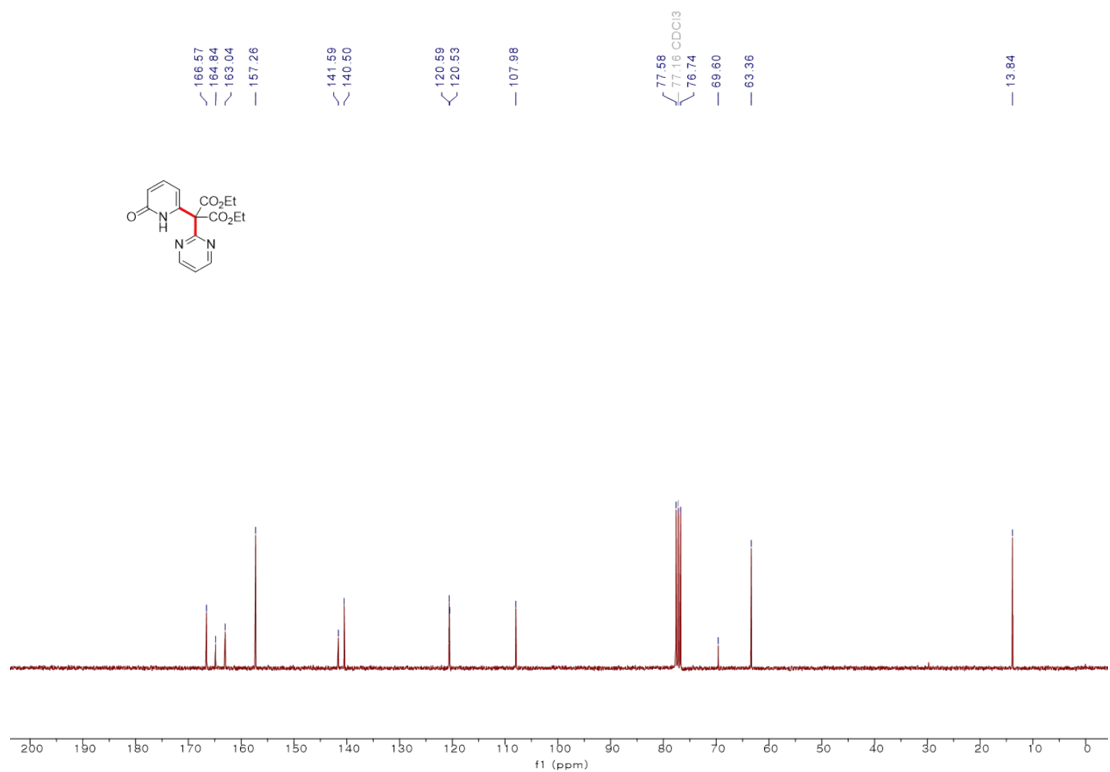

<sup>13</sup>C NMR of **4l** (75 MHz, Chloroform-*d*)

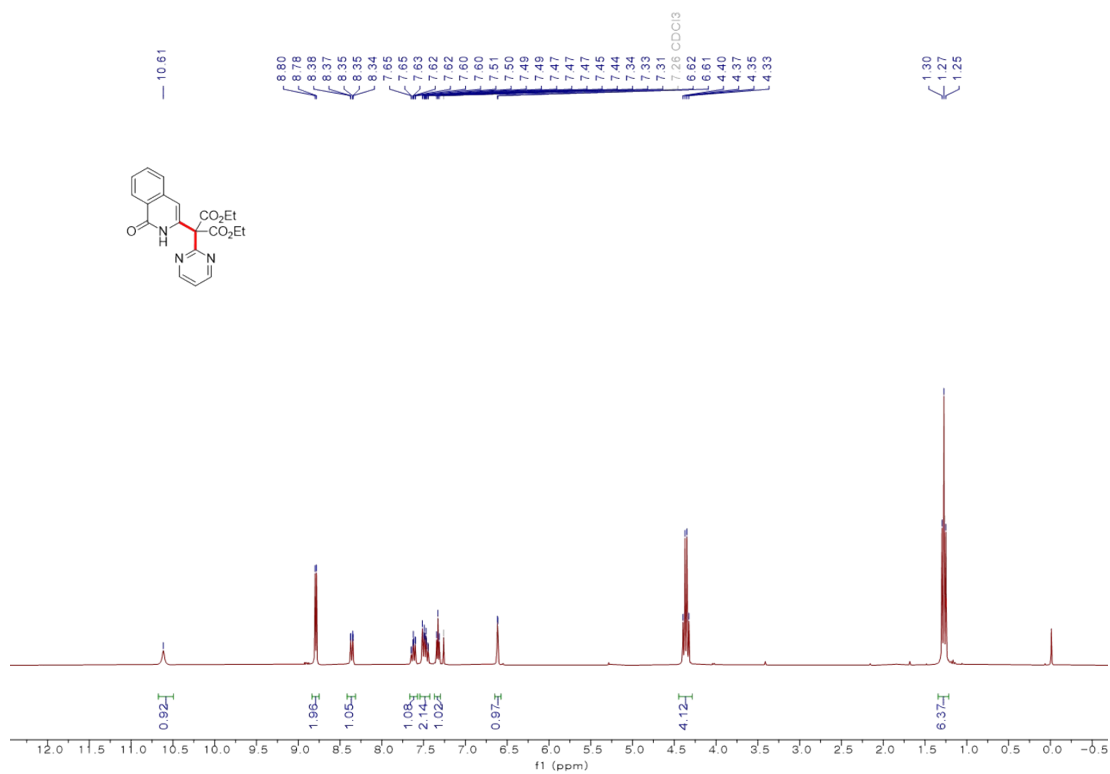

<sup>1</sup>H NMR of **4m** (300 MHz, Chloroform-*d*)

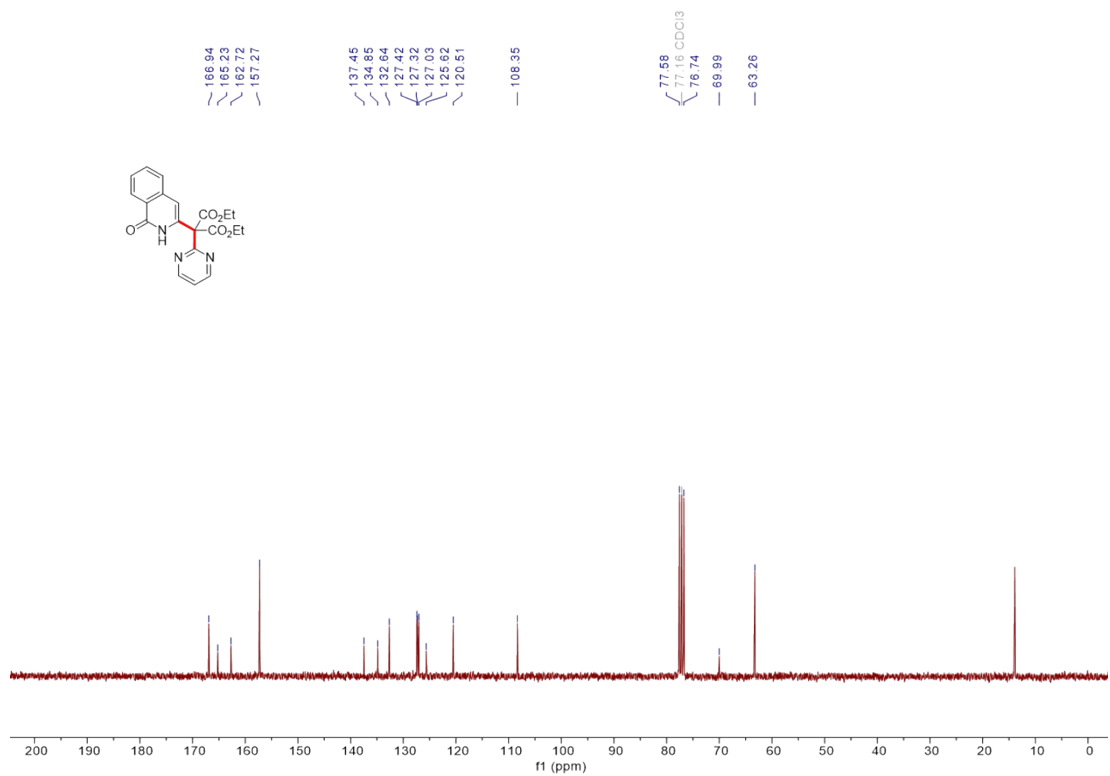

<sup>13</sup>C NMR of **4m** (75 MHz, Chloroform-*d*)

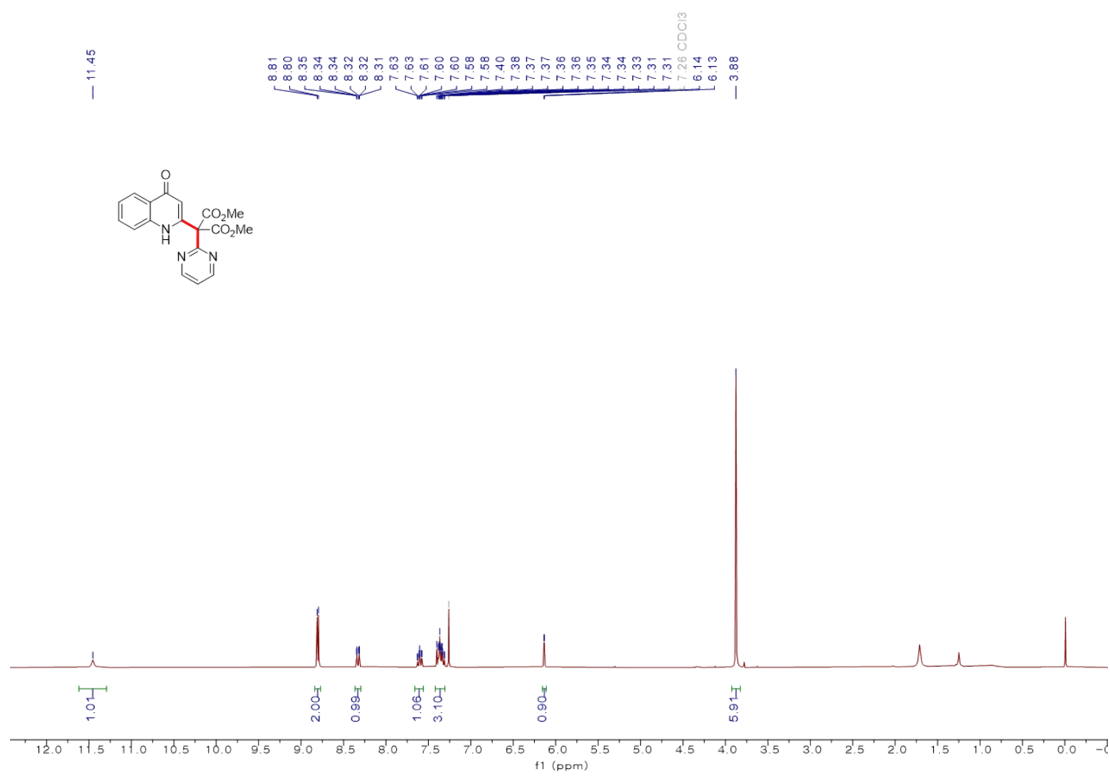

<sup>1</sup>H NMR of **4n** (300 MHz, Chloroform-*d*)



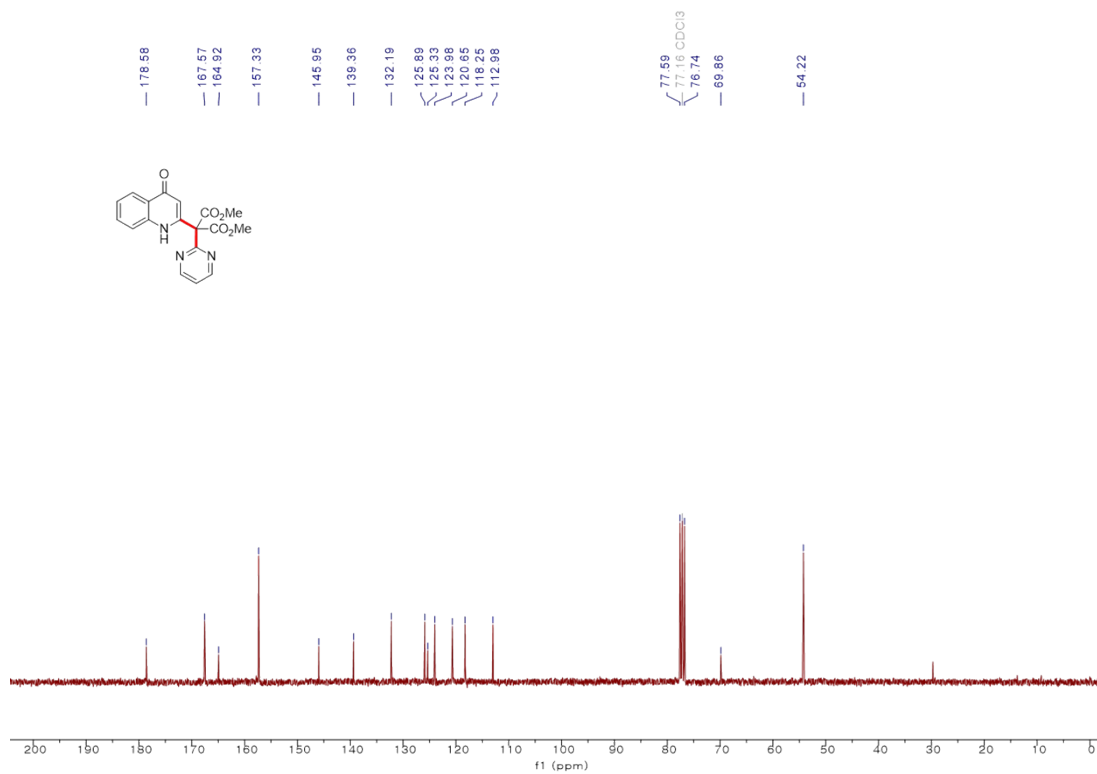

<sup>13</sup>C NMR of **4n** (75 MHz, Chloroform-*d*)

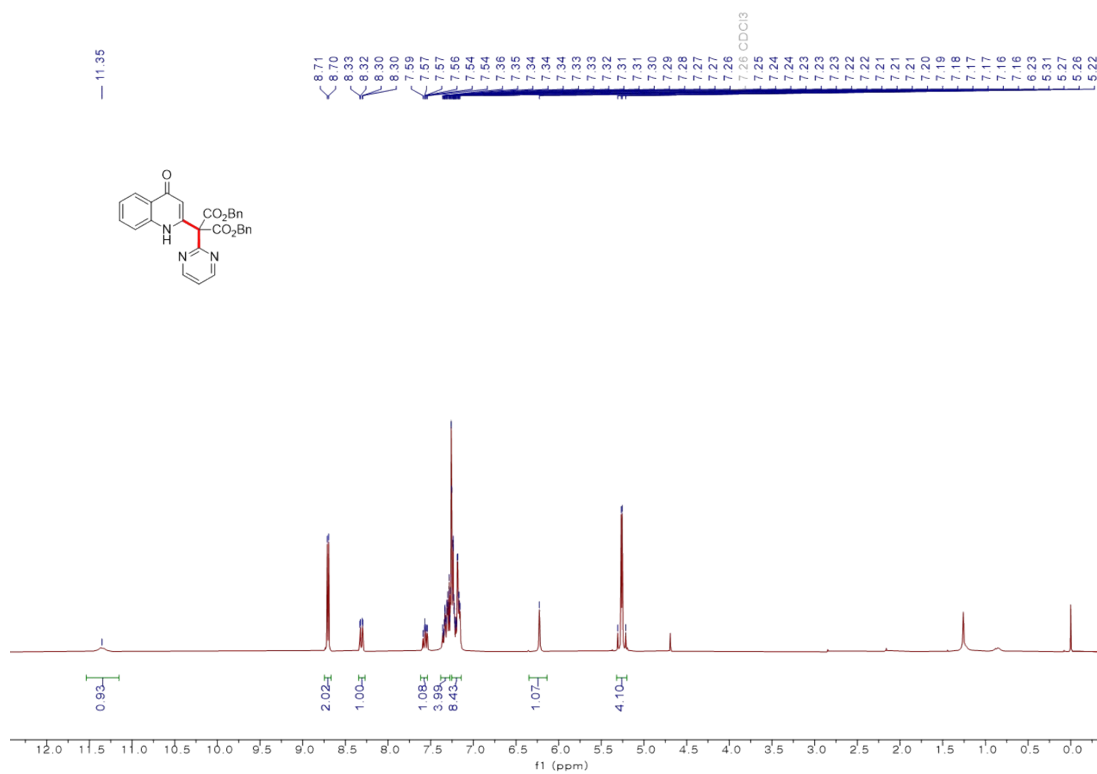

<sup>1</sup>H NMR of **4o** (300 MHz, Chloroform-*d*)

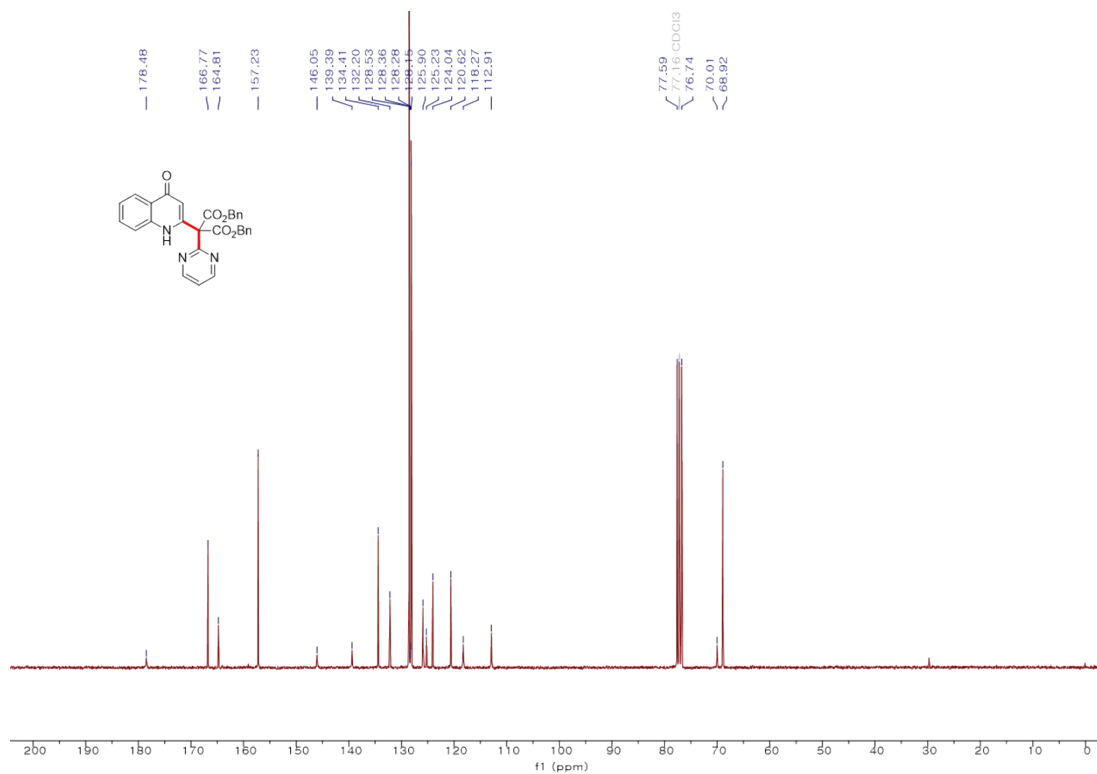

<sup>13</sup>C NMR of **4o** (75 MHz, Chloroform-*d*)

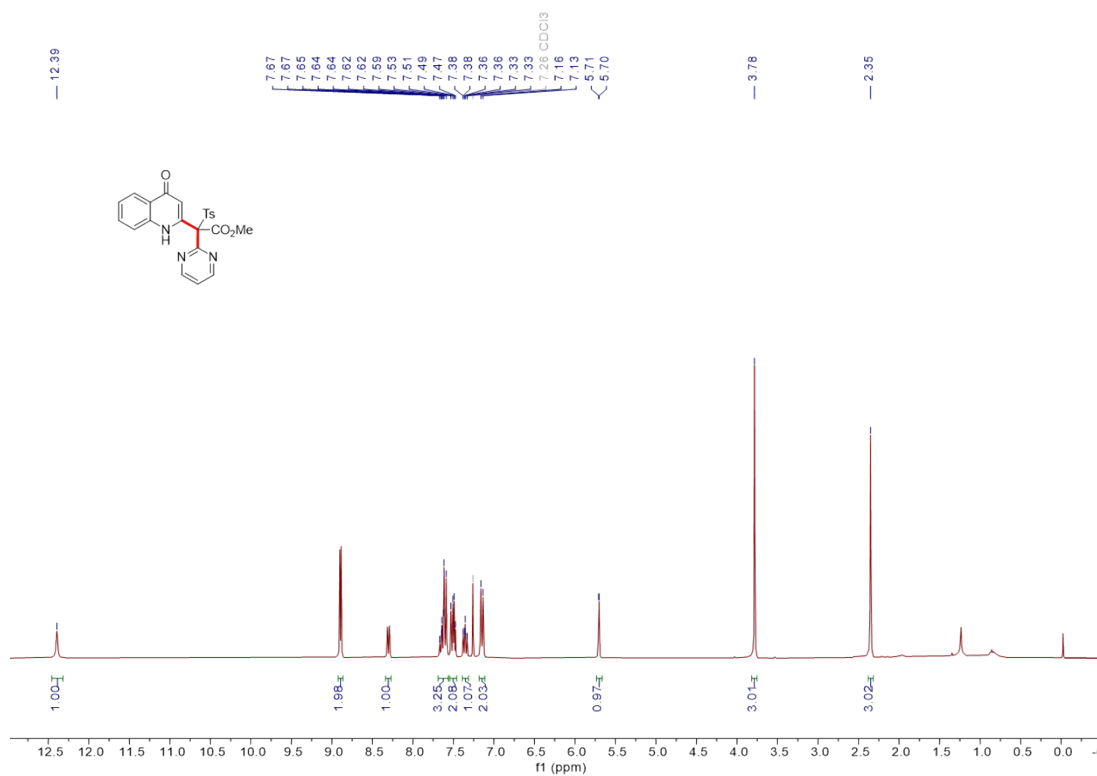

<sup>1</sup>H NMR of **4p** (300 MHz, Chloroform-*d*)

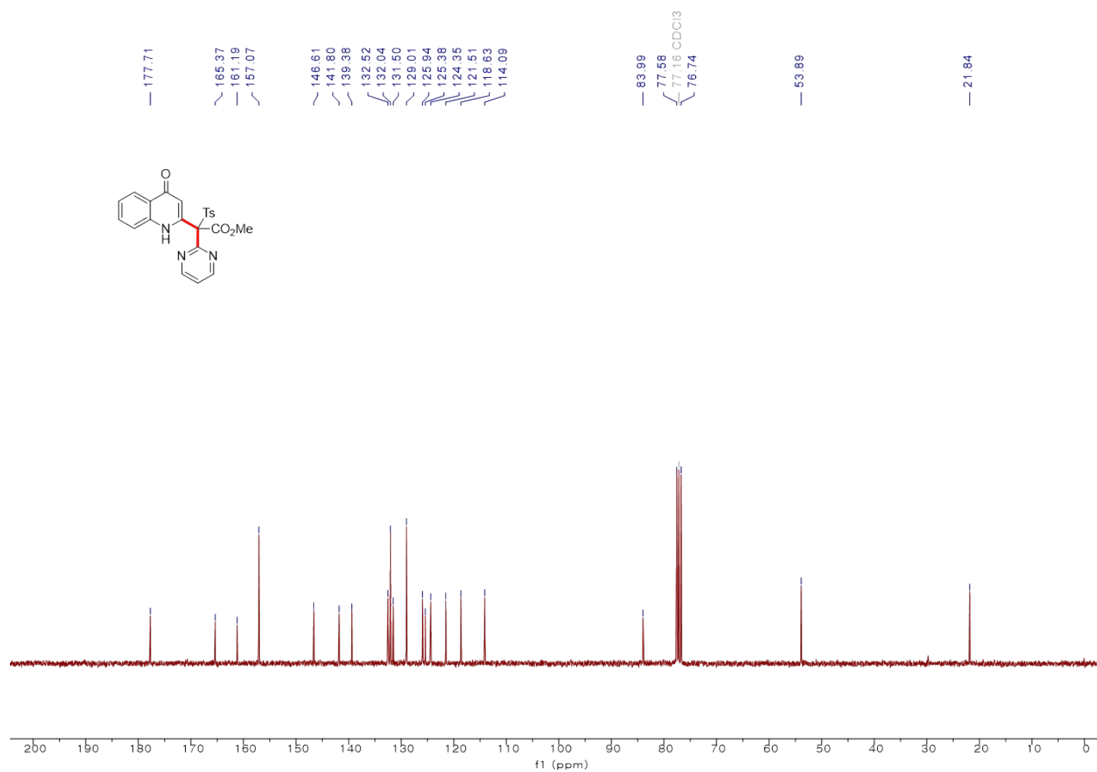

<sup>13</sup>C NMR of **4p** (75 MHz, Chloroform-*d*)

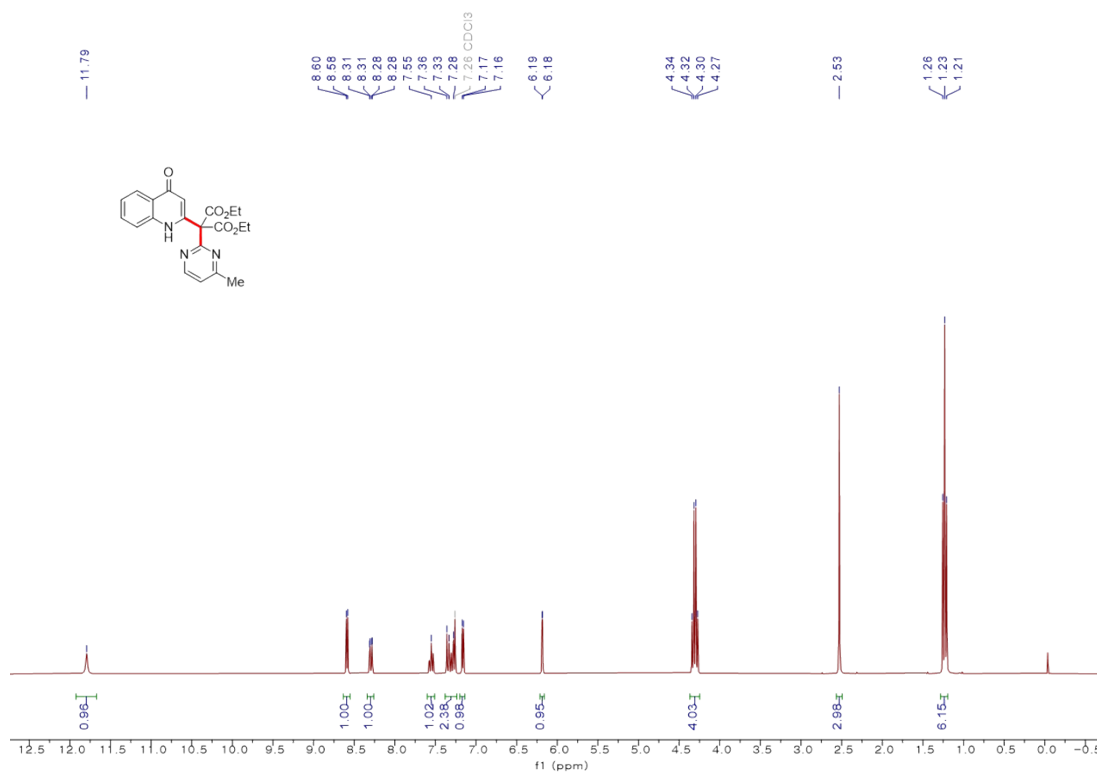

<sup>1</sup>H NMR of **4q** (300 MHz, Chloroform-*d*)

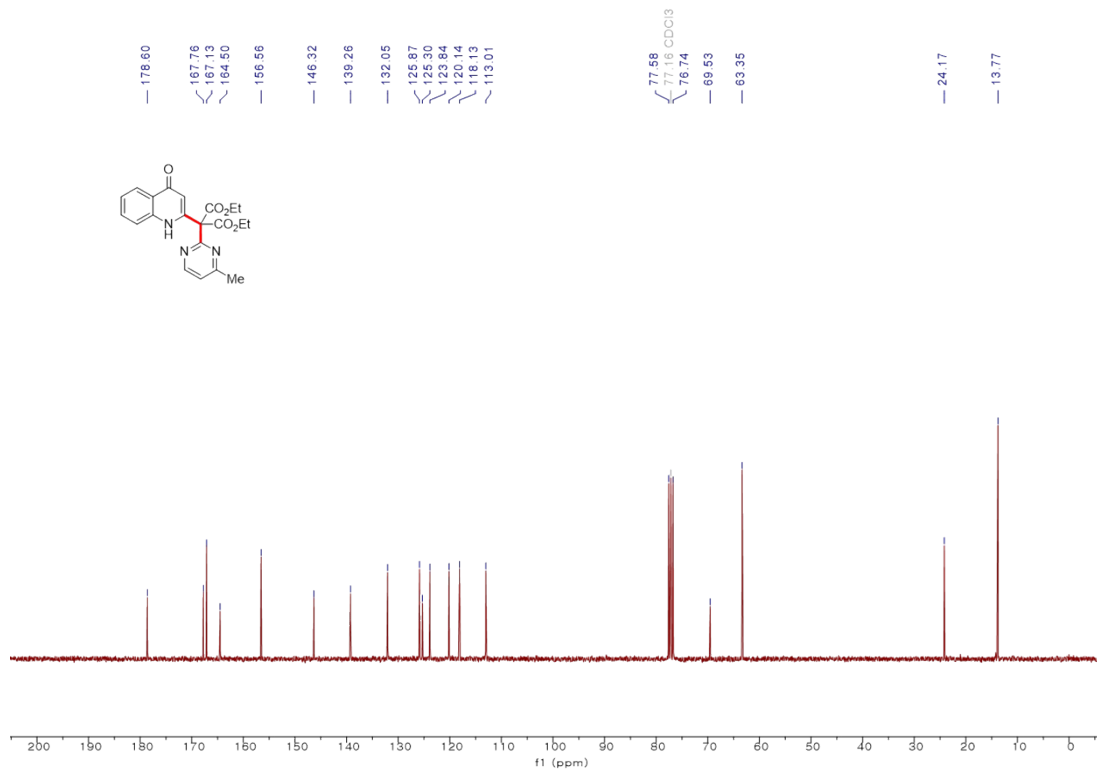

<sup>13</sup>C NMR of **4q** (75 MHz, Chloroform-*d*)

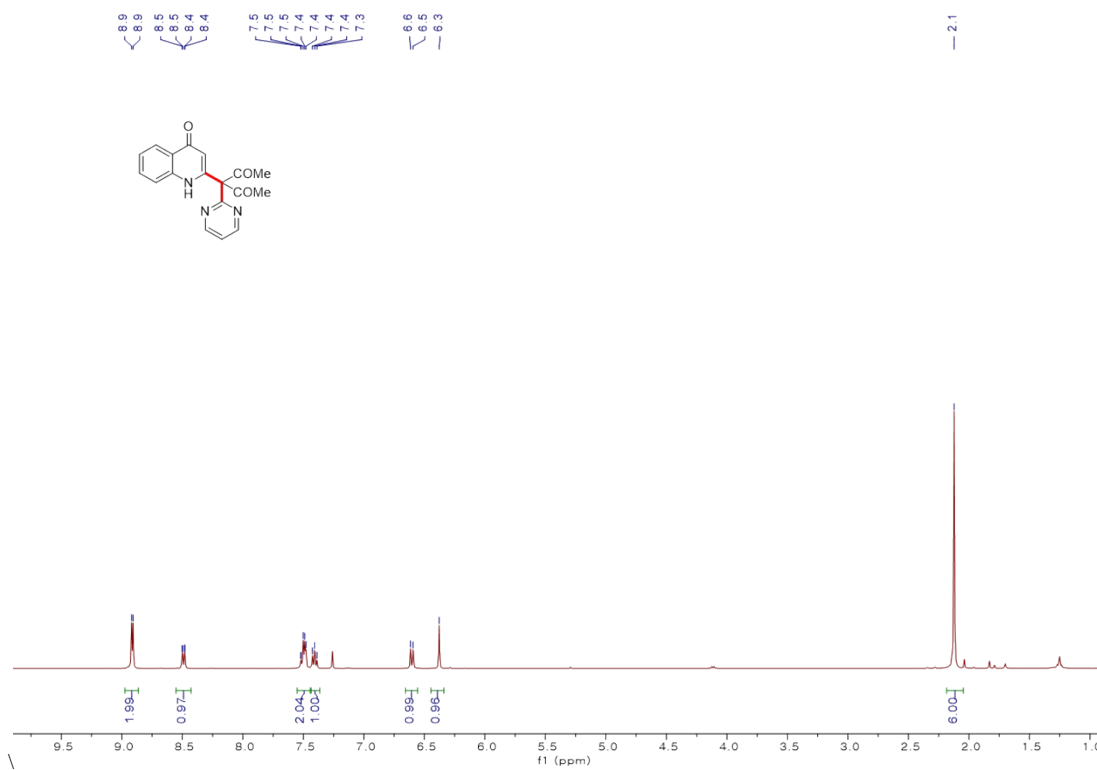

<sup>1</sup>H NMR of **4r** (400 MHz, Chloroform-*d*)

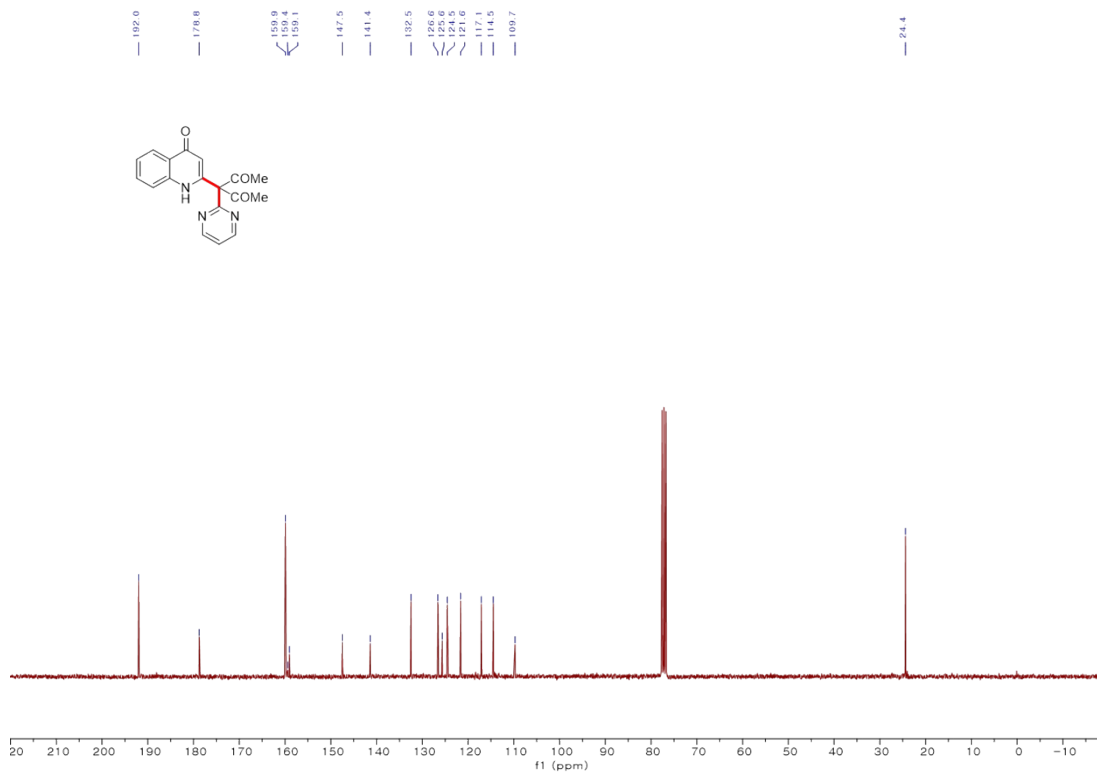

<sup>13</sup>C NMR of **4r** (75 MHz, Chloroform-*d*)

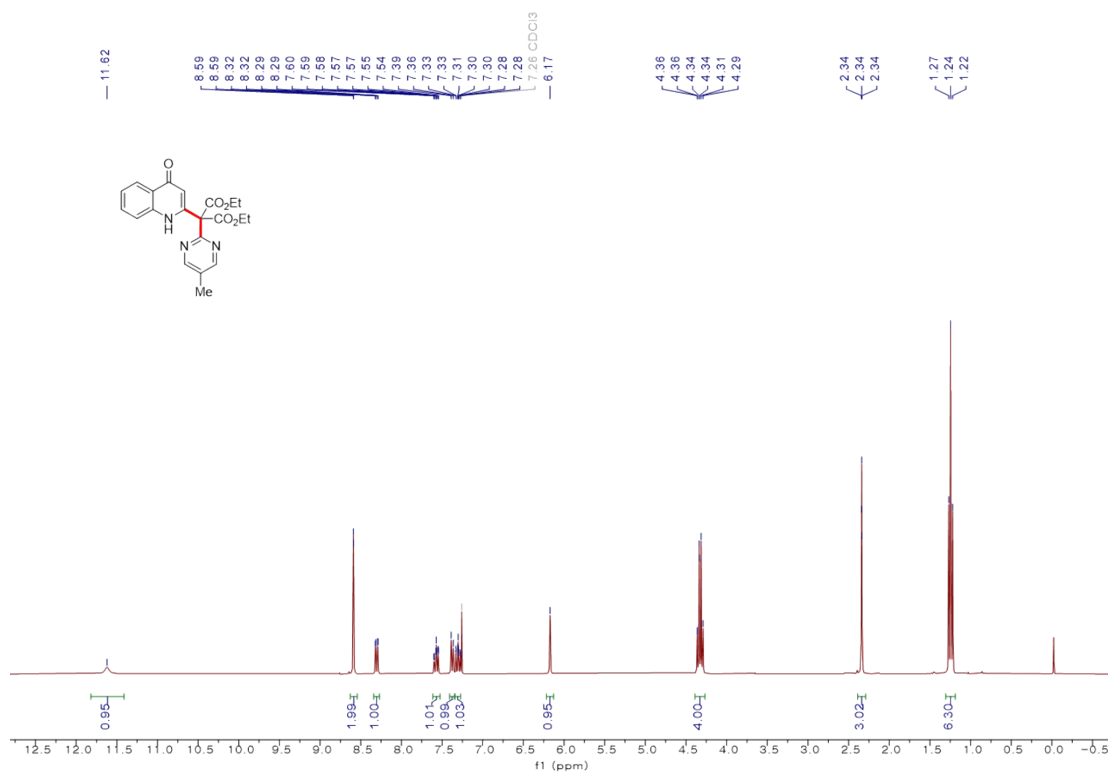

<sup>1</sup>H NMR of **4s** (300 MHz, Chloroform-*d*)

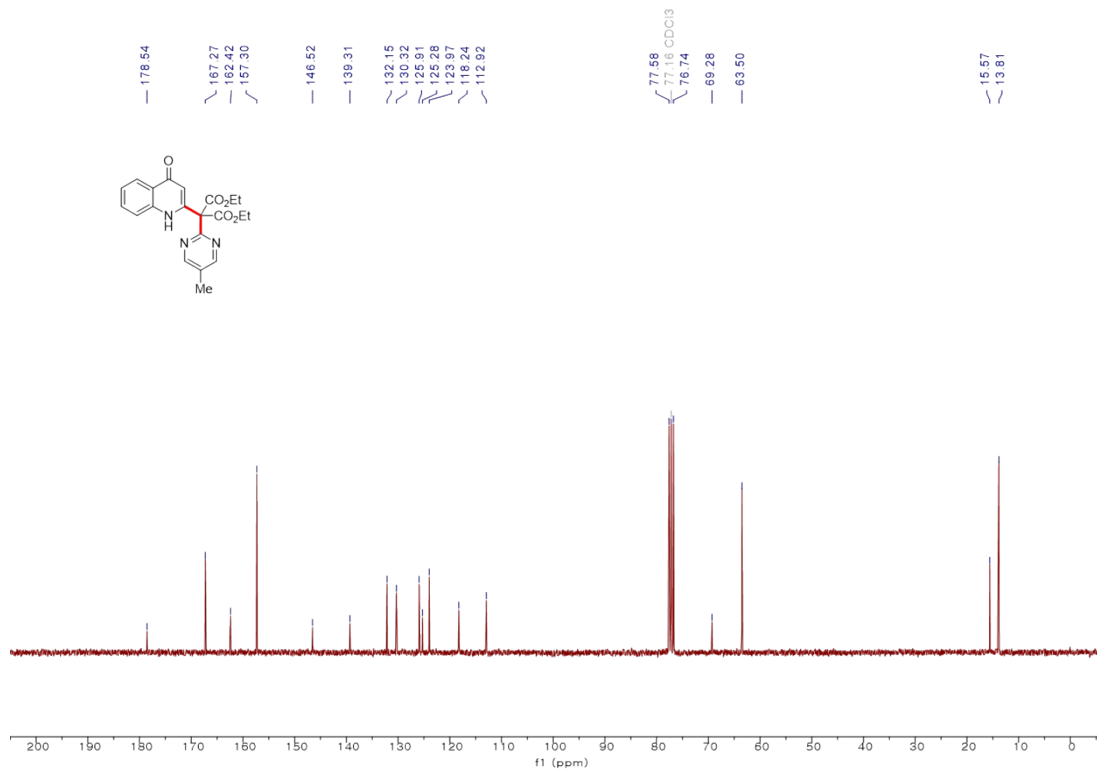

<sup>13</sup>C NMR of **4s** (75 MHz, Chloroform-*d*)

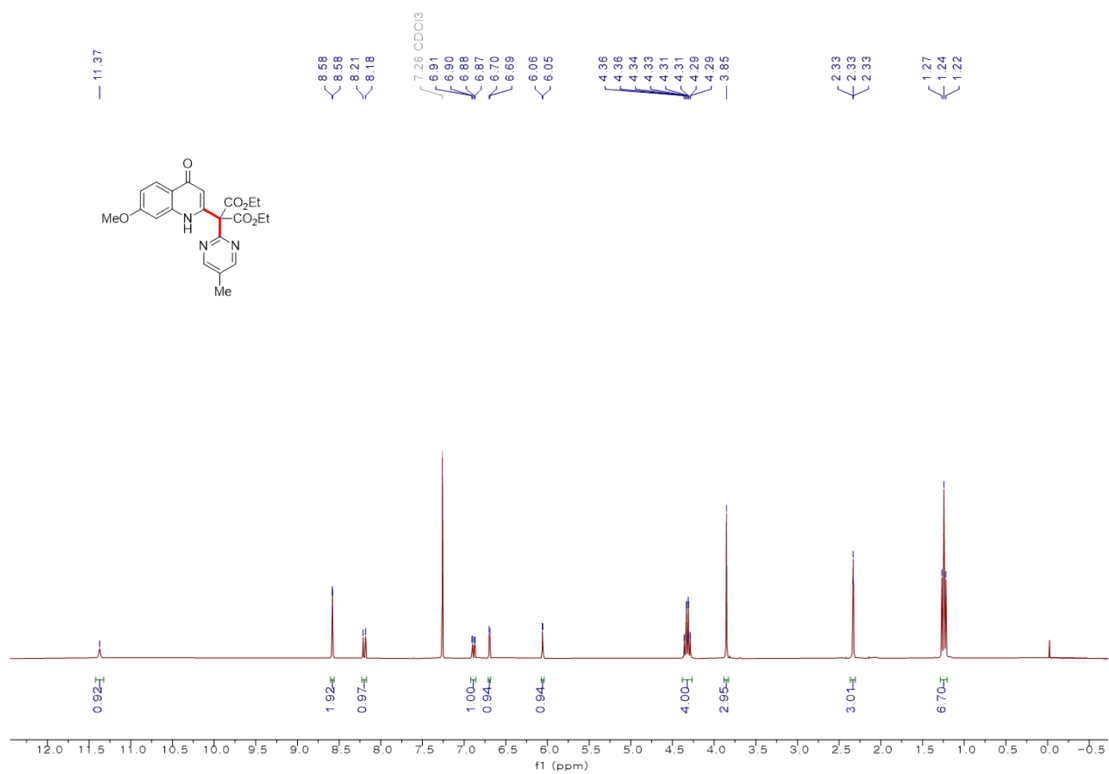

<sup>1</sup>H NMR of **4t** (300 MHz, Chloroform-*d*)

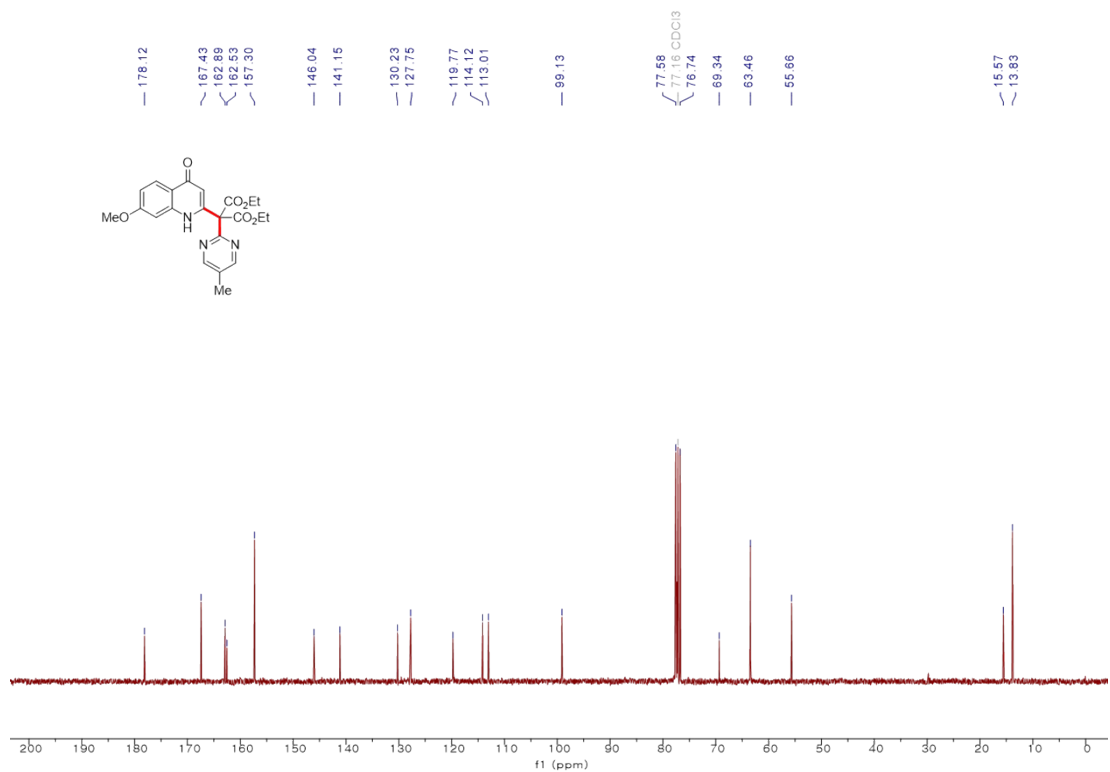

<sup>13</sup>C NMR of **4t** (75 MHz, Chloroform-*d*)

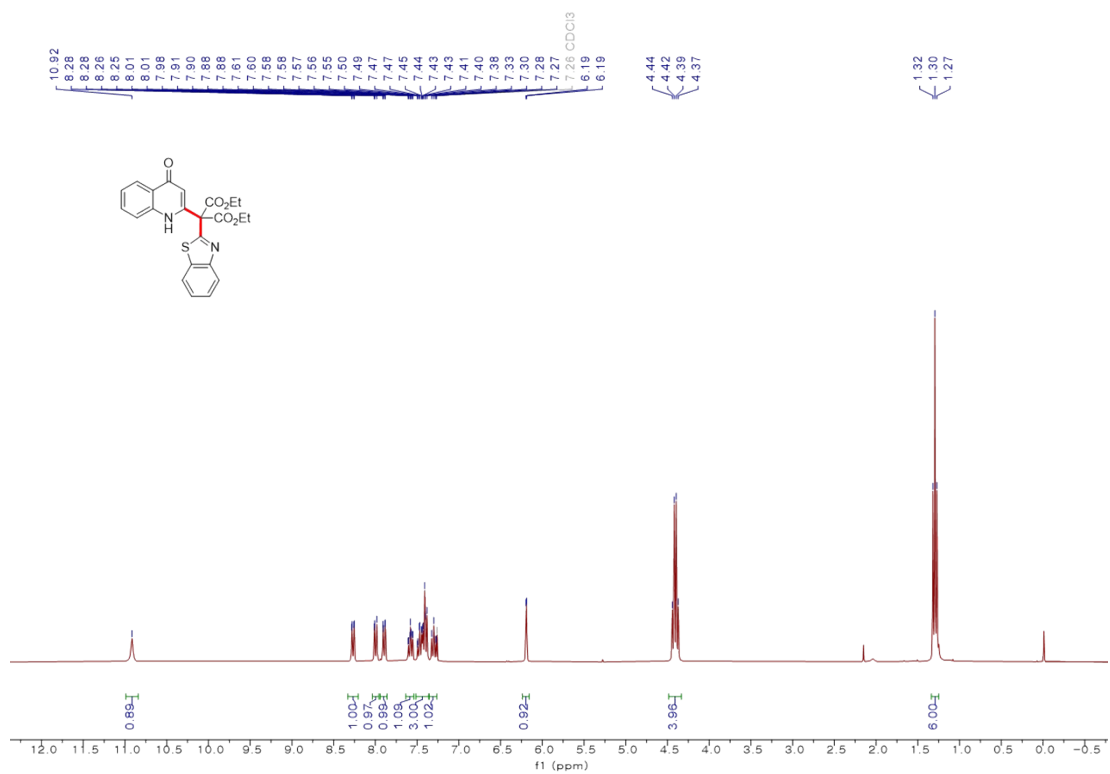

<sup>1</sup>H NMR of **4u** (300 MHz, Chloroform-*d*)

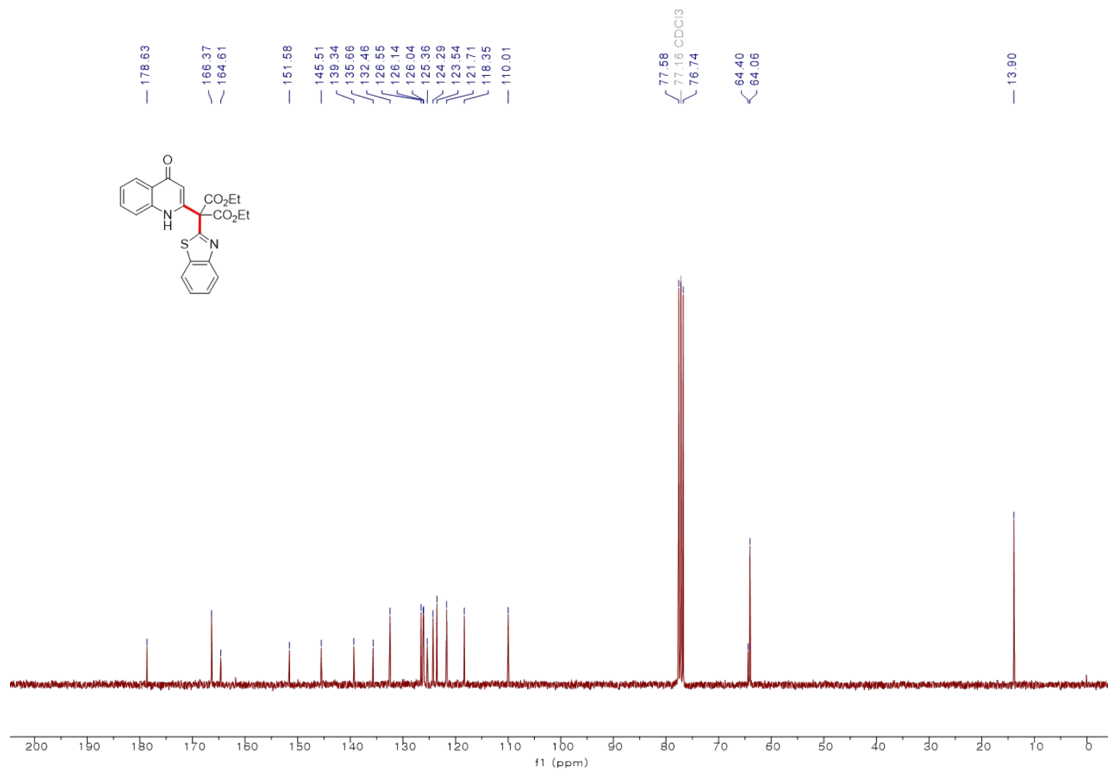

<sup>13</sup>C NMR of **4u** (75 MHz, Chloroform-*d*)

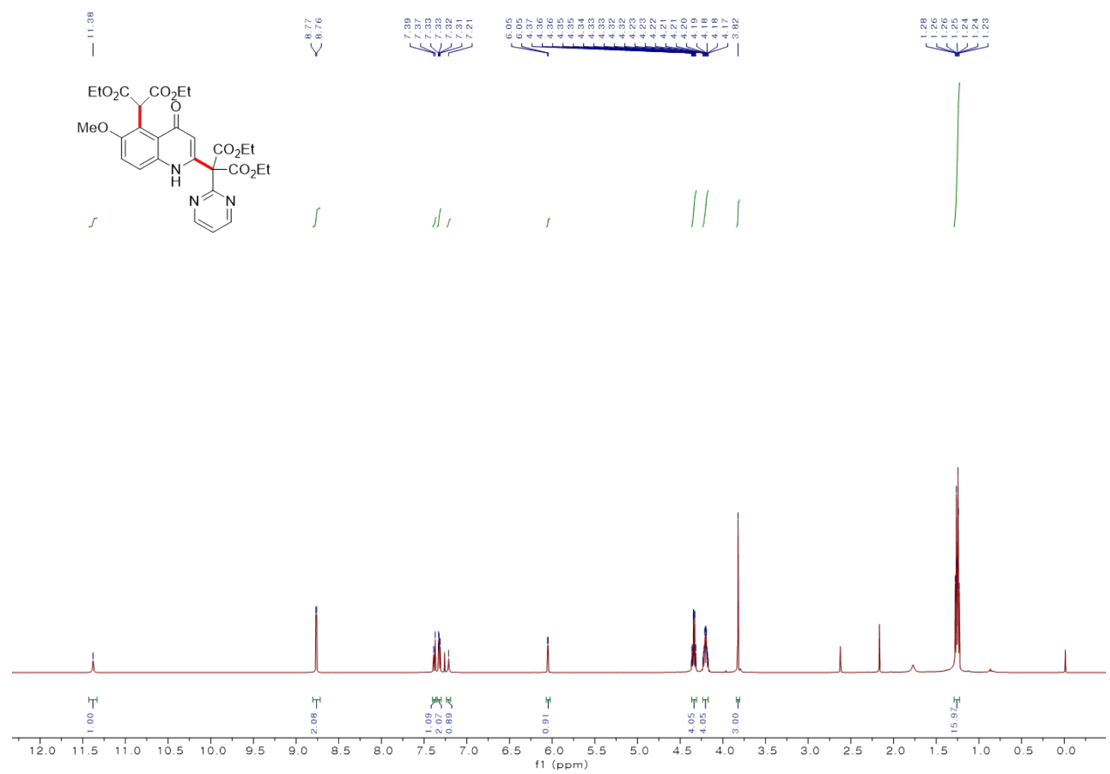

<sup>1</sup>H NMR of **4x** (500 MHz, Chloroform-*d*)



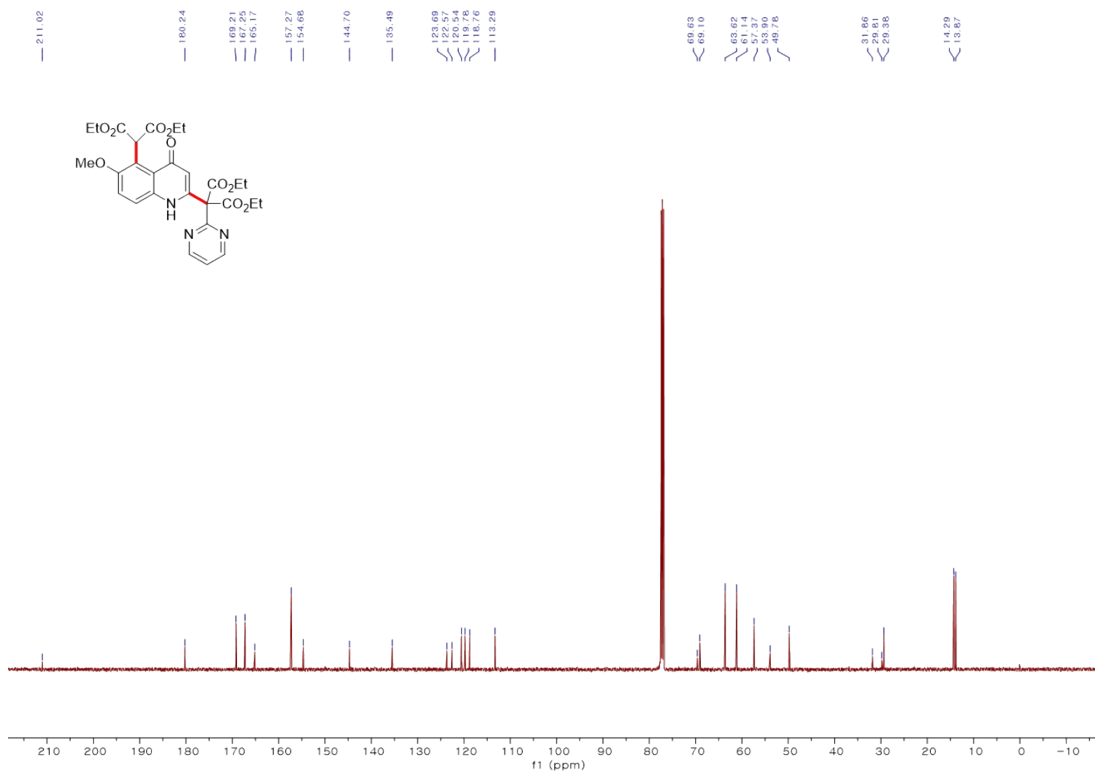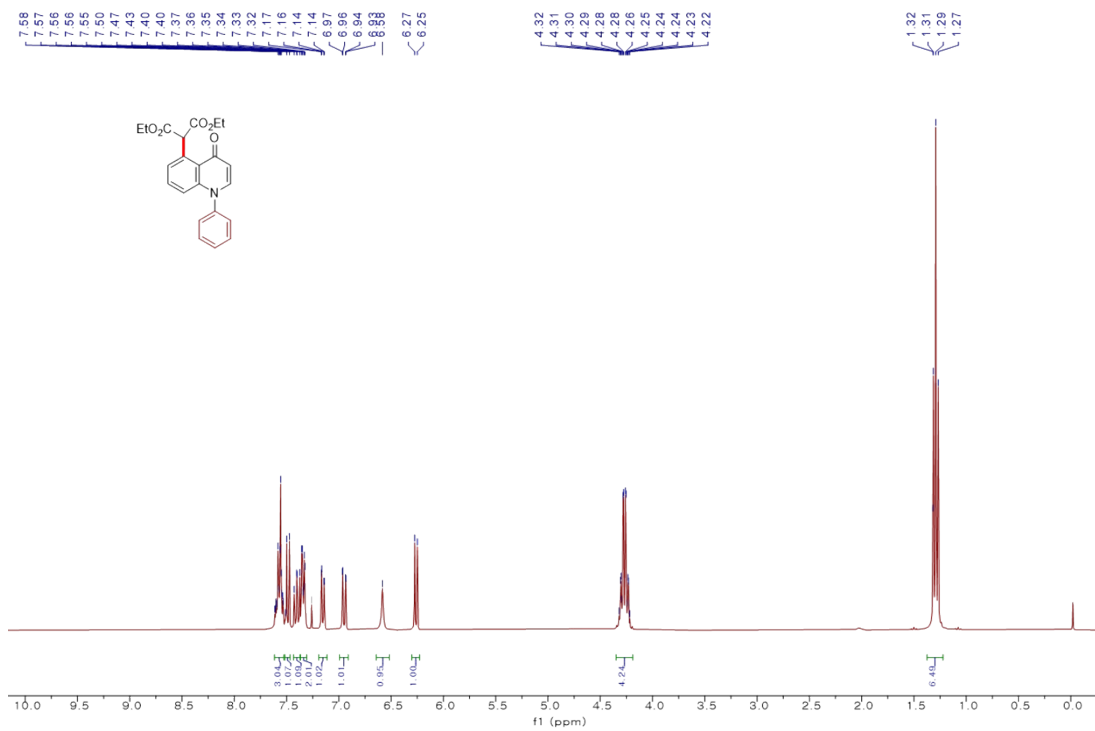

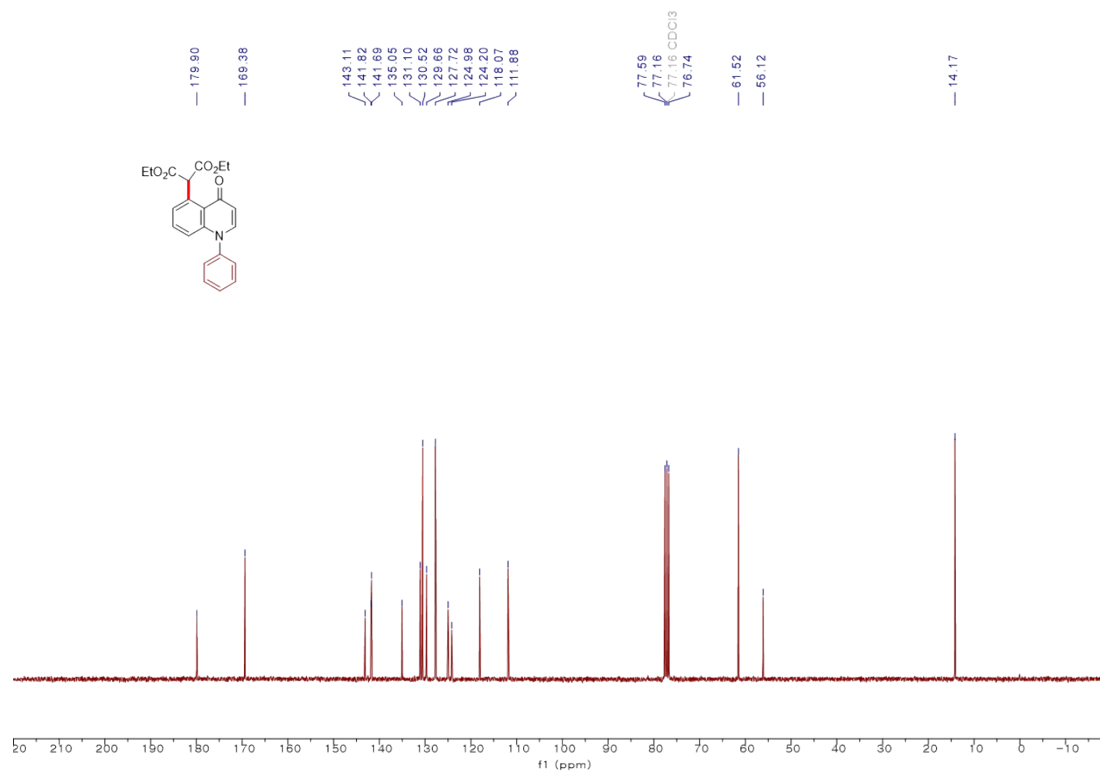

$^{13}\text{C}$  NMR of **11** (75 MHz, Chloroform-*d*)

## 11. Copies of HRMS Spectra

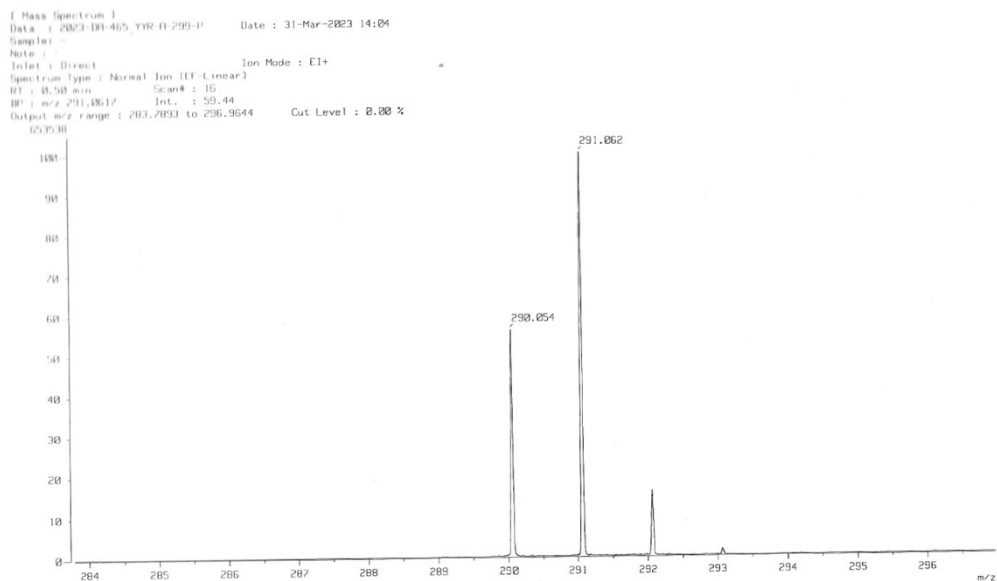

HRMS spectra of 1e

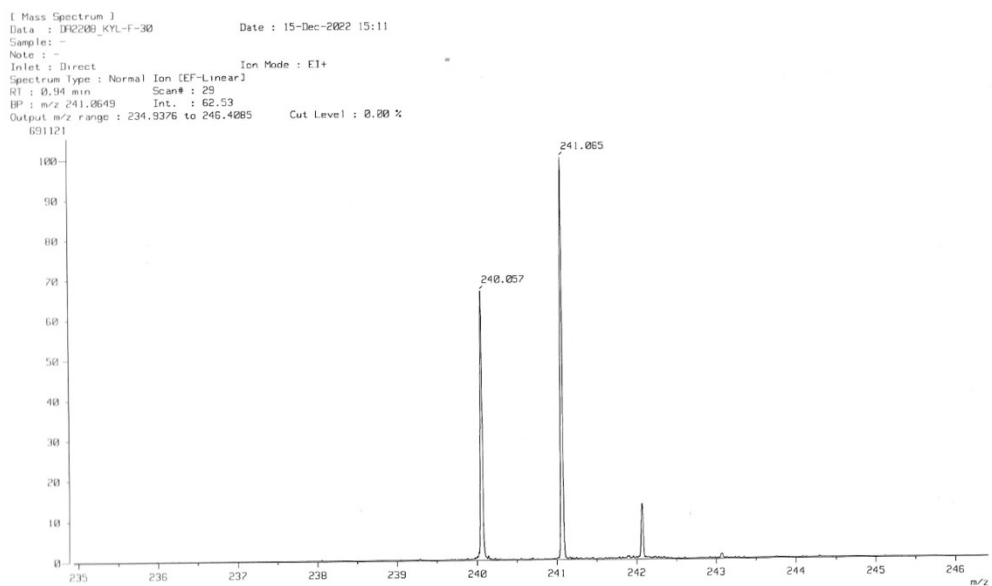

HRMS spectra of 1j

[ Mass Spectrum ]  
Data : DF2208\_YXR-R-271-P Date : 15-Dec-2022 16:14  
Sample : -  
Note : -  
Inlet : Direct Ion Mode : EI+  
Spectrum Type : Normal Ion (EF-Linear)  
RT : 1.17 min Scan# : 36  
BP : m/z 263.0954 Int. : 62.12  
Output m/z range : 277.7415 to 288.5389 Cut Level : 0.00 %  
686052

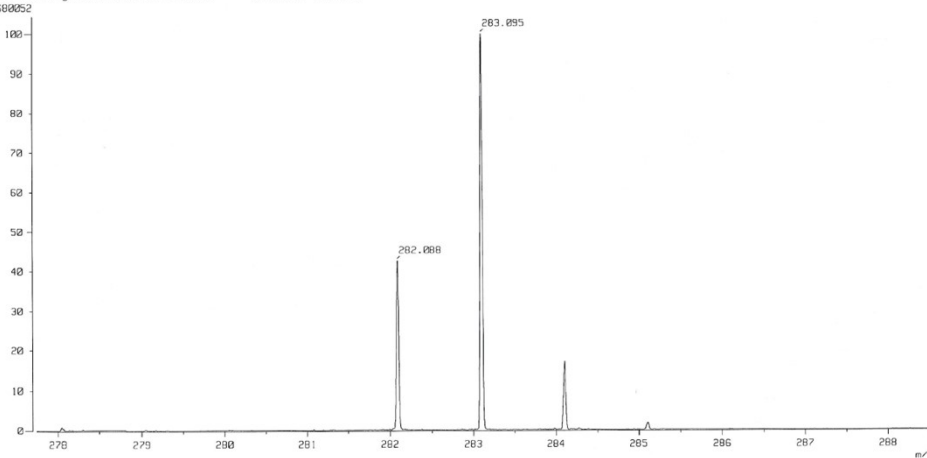

HRMS spectra of **1k**

[ Mass Spectrum ]  
Data : DF2208\_KYL-E-340 Date : 15-Dec-2022 15:16  
Sample : -  
Note : -  
Inlet : Direct Ion Mode : EI+  
Spectrum Type : Normal Ion (EF-Linear)  
RT : 0.74 min Scan# : 23  
BP : m/z 236.0828 Int. : 36.93  
Output m/z range : 231.0355 to 242.0742 Cut Level : 0.00 %  
392912

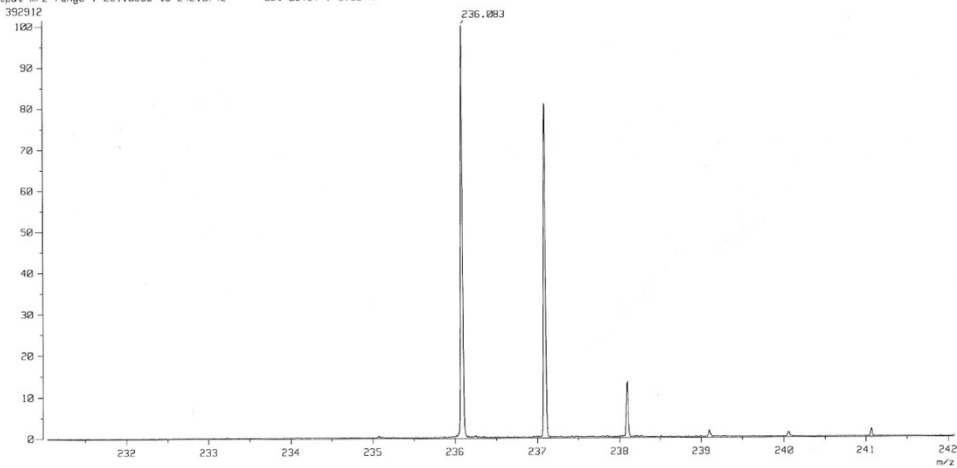

HRMS spectra of **1t**

[ Mass Spectrum ]  
Data : DR2208\_KYL-E-341 Date : 15-Dec-2022 15:21  
Sample : -  
Note : -  
Inlet : Direct Ion Mode : EI+  
Spectrum Type : Normal Ion [EF-Linear]  
RT : 0.74 min Scan# : 23  
BP : m/z 236.082 Int. : 43.54  
Output m/z range : 232.0759 to 241.4294 Cut Level : 0.00 %

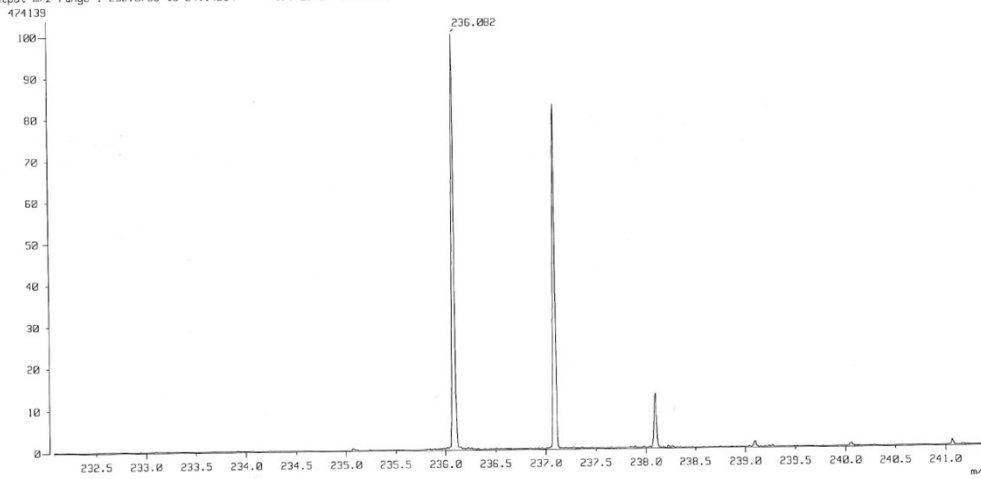

HRMS spectra of **1u**

[ Mass Spectrum ]  
Date : 2023-DR-577\_YR-B-49-P Date : 17-Apr-2023 16:35  
Sample : -  
Note : -  
Inlet : Direct Ion Mode : EI+  
Spectrum Type : Normal Ion [EF-Linear]  
RT : 0.54 min Scan# : 17  
BP : m/z 267.1005 Int. : 47.33  
Output m/z range : 259.0772 to 273.7656 Cut Level : 0.00 %

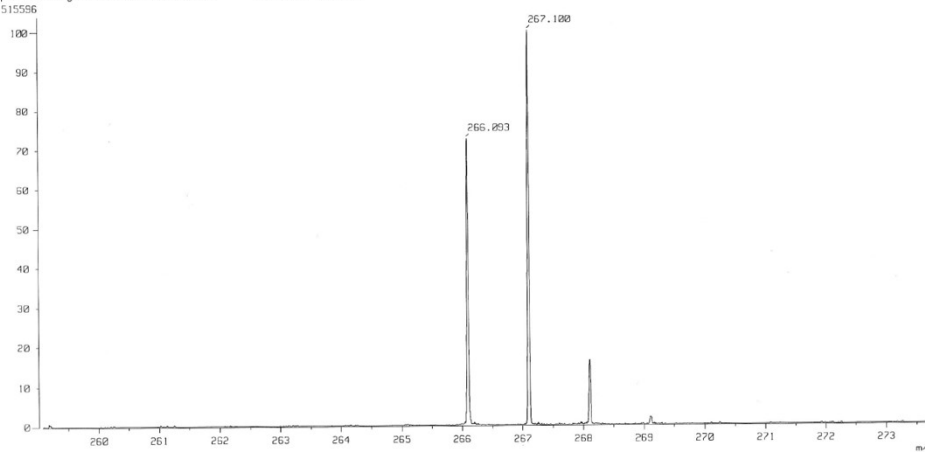

HRMS spectra of **1v**

[ Mass Spectrum ]  
Data : DF0200\_KYL-E-343 Date : 15-Dec-2022 15:26  
Sample : -  
Date : -  
Inlet : Direct Ion Mode : EI+  
Spectrum Type : Normal Ion (EF-Linear)  
RT : 0.60 min Scan# : 19  
BP : m/z 300.9049 Int. : 45.37  
Output m/z range : 295.7270 to 308.0119 Cut Level : 0.00 %

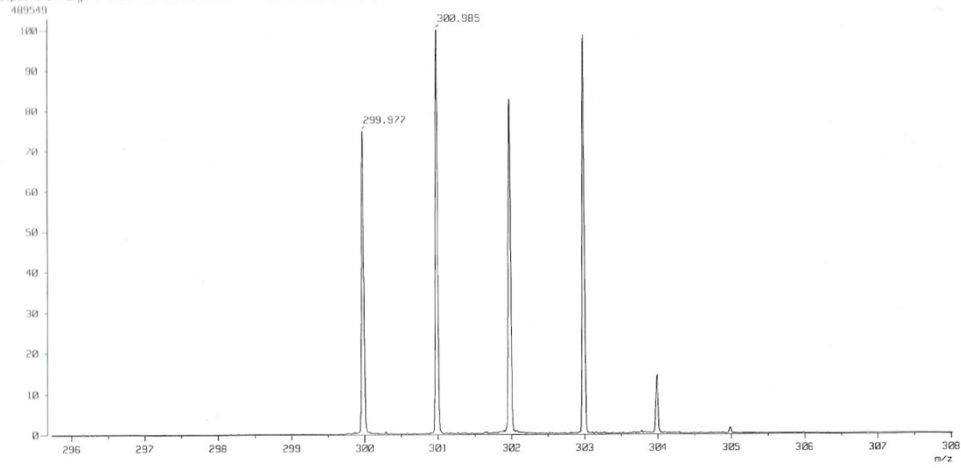

HRMS spectra of 1w

[ Mass Spectrum ]  
Data : DF0200\_YXR-R-218-P Date : 15-Dec-2022 16:10  
Sample : -  
Date : -  
Inlet : Direct Ion Mode : EI+  
Spectrum Type : Normal Ion (EF-Linear)  
RT : 0.94 min Scan# : 29  
BP : m/z 223.0748 Int. : 72.51  
Output m/z range : 216.6912 to 228.7319 Cut Level : 0.00 %

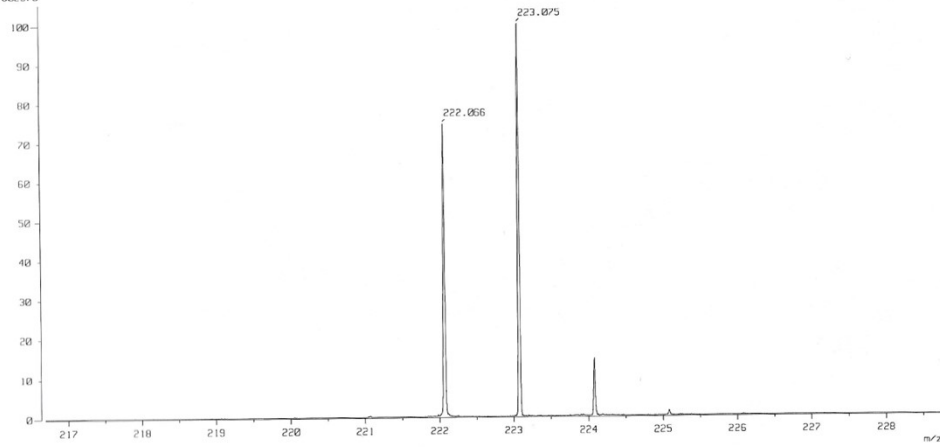

HRMS spectra of 1x

[ Mass Spectrum ]  
Date : 15-Dec-2022 16:03  
Sample: -  
Note: -  
Inlet : Direct Ion Mode : EI+  
Spectrum Type : Normal Ion [EF-Linear]  
RT : 0.57 min Scan# : 18  
BP : m/z 277.0433 Int. : 47.72  
Output m/z range : 272.3688 to 283.3577 Cut Level : 0.00 %

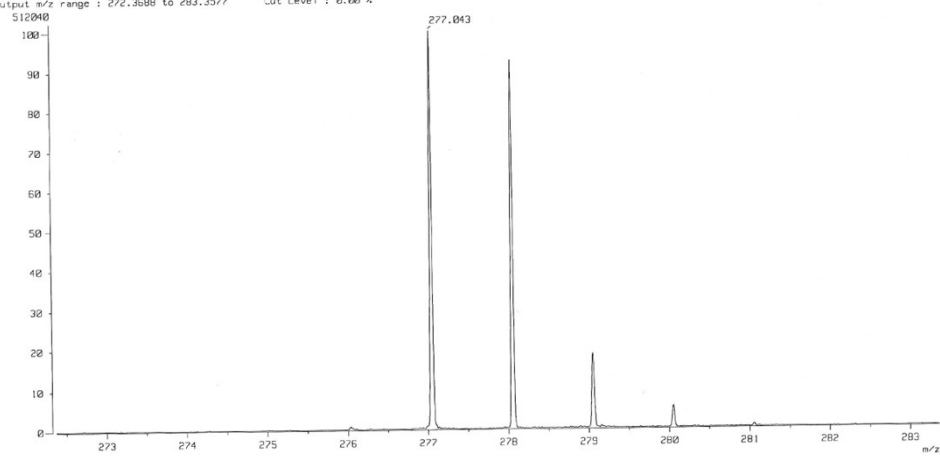

HRMS spectra of 1y

[ Mass Spectrum ]  
Date : 31-Mar-2023 10:34  
Sample: -  
Note: -  
Inlet : Direct Ion Mode : EI+  
Spectrum Type : Normal Ion [EF-Linear]  
RT : 0.64 min Scan# : 20  
BP : m/z 381.1327 Int. : 86.16  
Output m/z range : 375.5637 to 386.9644 Cut Level : 0.00 %

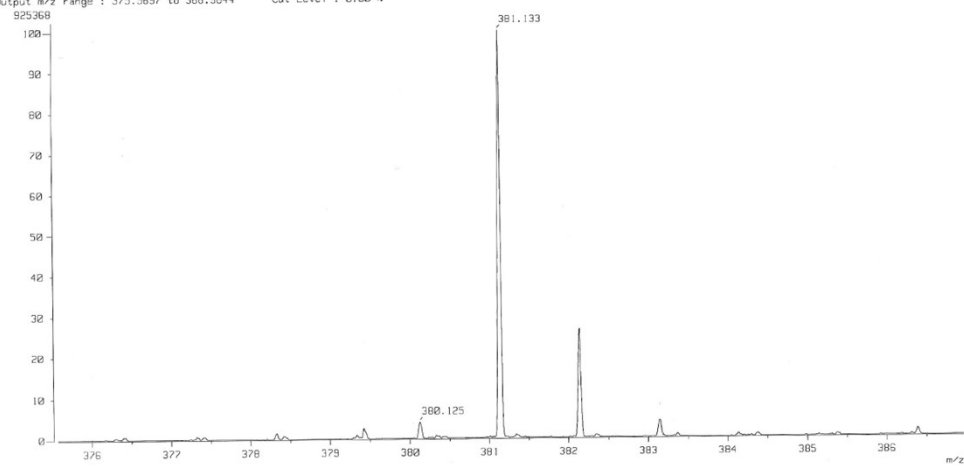

HRMS spectra of 3a

[ Mass Spectrum ]  
Data : 2023-04-465\_YXR-A-200-2 Date : 31-Mar-2023 14:07  
Sample: -  
Note : -  
Inlet : Direct Ion Mode : EI+  
Spectrum Type : Normal Ion [EF-Linear]  
RT : 0.77 min Scan# : 24  
BP : m/z 395.1485 Int. : 36.79  
Output m/z range : 388.2344 to 402.2107 Cut Level : 0.00 %

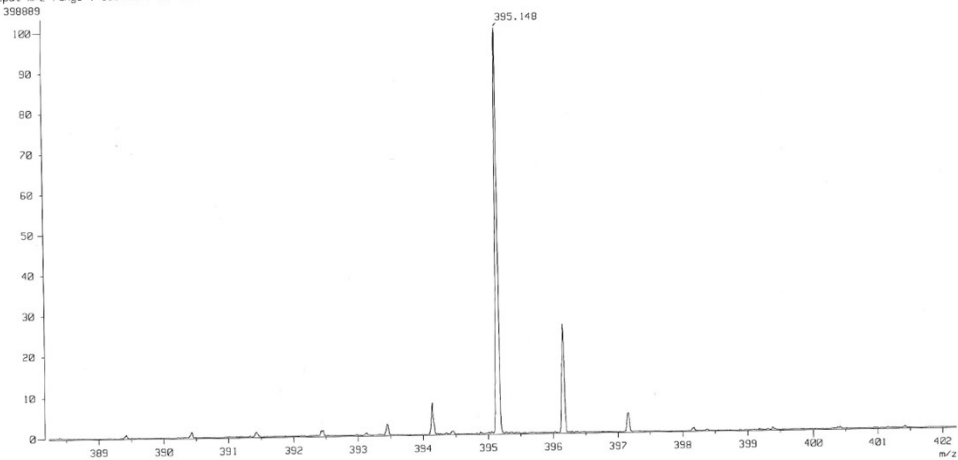

HRMS spectra of **3b**

[ Mass Spectrum ]  
Data : 2023-04-577\_YXR-A-209-A Date : 17-Apr-2023 16:40  
Sample: -  
Note : -  
Inlet : Direct Ion Mode : EI+  
Spectrum Type : Normal Ion [EF-Linear]  
RT : 0.07 min Scan# : 27  
BP : m/z 411.1432 Int. : 29.56  
Output m/z range : 403.4929 to 419.0319 Cut Level : 0.00 %

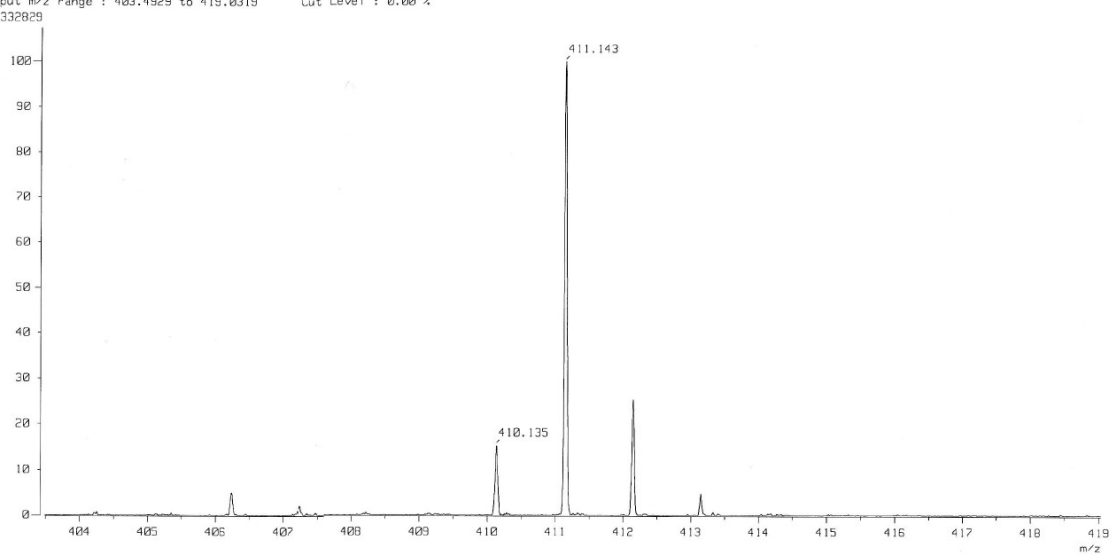

HRMS spectra of **3c**



[ Mass Spectrum ]  
Data : DF2208\_YVR-A1-269-1 Date : 15-Dec-2022 16:28  
Sample : -  
Note : -  
Inlet : Direct Ion Mode : EI+  
Spectrum Type : Normal Ion [EF-Linear]  
RT : 0.80 min Scan# : 25  
BP : m/z 415.0937 Int. : 78.18  
Output m/z range : 409.8369 to 421.4095 Cut Level : 0.00 %  
642837

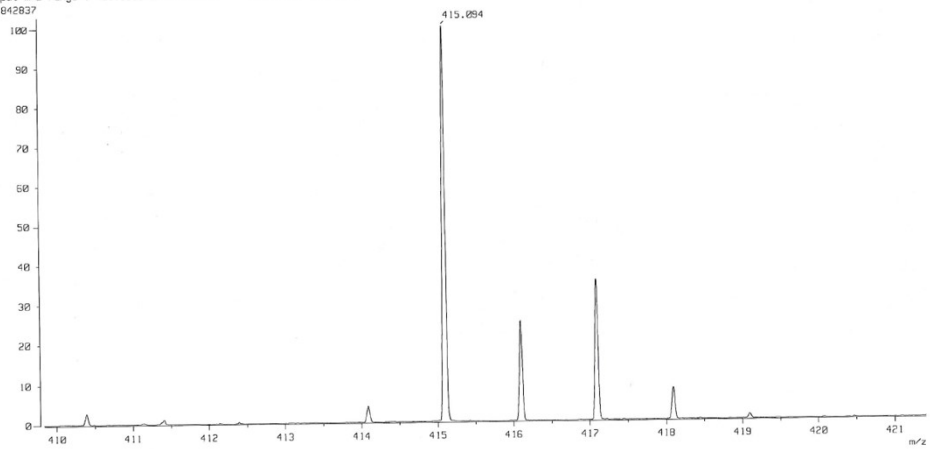

HRMS spectra of 3d

[ Mass Spectrum ]  
Data : 2023-DR-465\_YVR-B-11-2 Date : 31-Mar-2023 14:11  
Sample : -  
Note : -  
Inlet : Direct Ion Mode : EI+  
Spectrum Type : Normal Ion [EF-Linear]  
RT : 0.90 min Scan# : 28  
BP : m/z 449.1201 Int. : 53.24  
Output m/z range : 443.1246 to 455.1424 Cut Level : 0.00 %  
569146

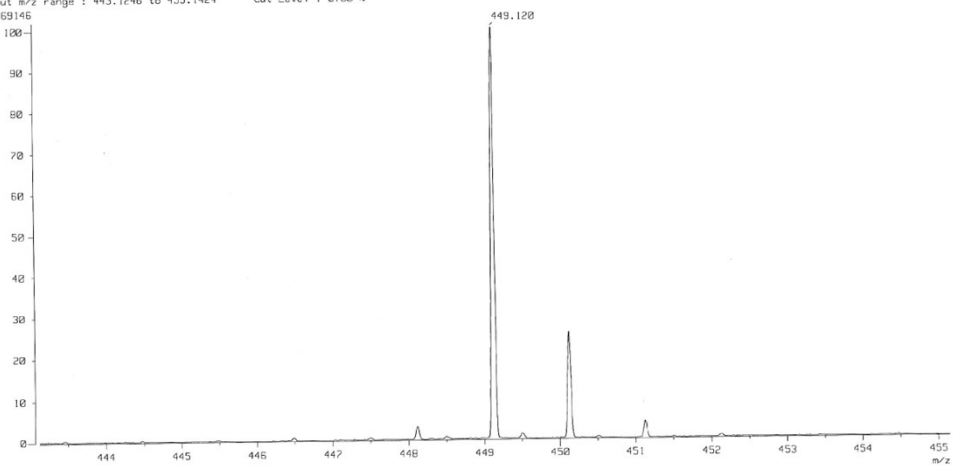

HRMS spectra of 3e

[ Mass Spectrum ]  
Date : 2023-03-31\_YR-B-S-2 Date : 31-Mar-2023 14:16  
Sample : -  
Note : -  
Inlet : Direct Ion Mode : EI+  
Spectrum Type : Normal Ion [EF-Linear]  
RT : 1.04 min Scan# : 32  
BP : m/z 426.1173 Int. : 78163  
Output m/z range : 418.9874 to 433.7448 Cut Level : 0.00 %  
858505

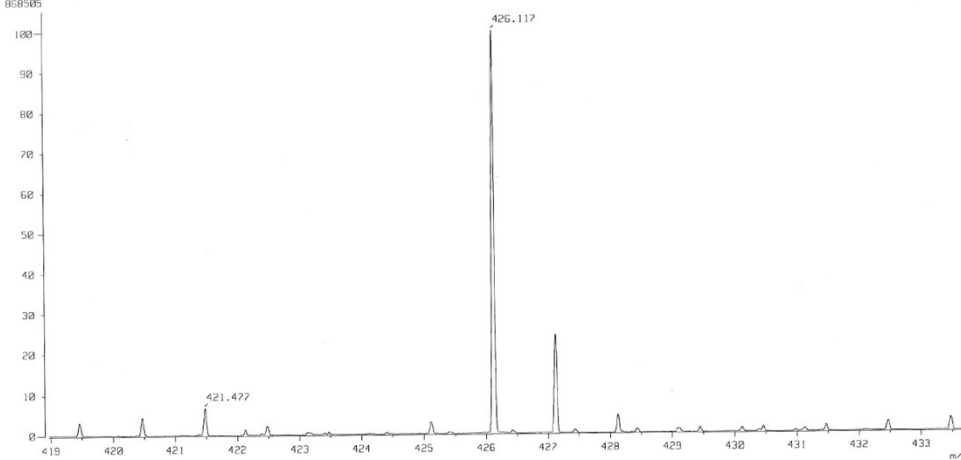

HRMS spectra of **3f**

[ Mass Spectrum ]  
Date : DP2200\_YR-R-268-2 Date : 15-Dec-2022 16:24  
Sample : -  
Note : -  
Inlet : Direct Ion Mode : EI+  
Spectrum Type : Normal Ion [EF-Linear]  
RT : 0.90 min Scan# : 28  
BP : m/z 411.1428 Int. : 53154  
Output m/z range : 405.1329 to 416.0742 Cut Level : 0.00 %  
563220

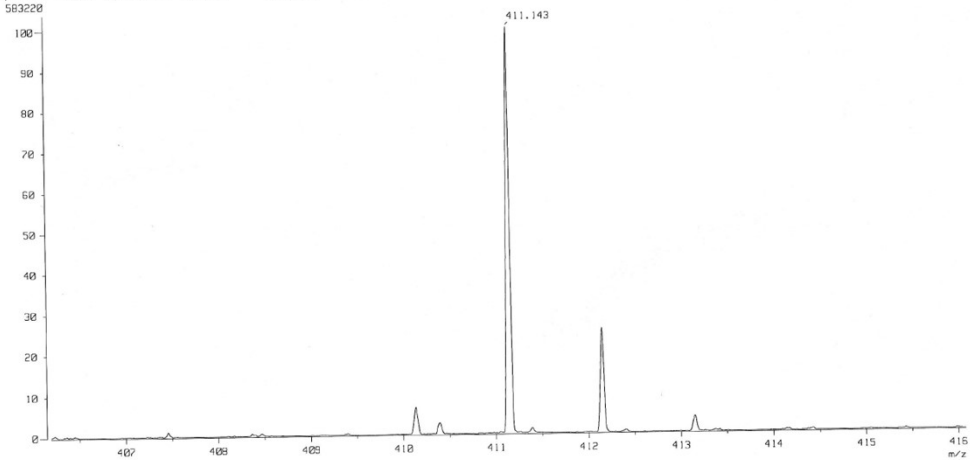

HRMS spectra of **3g**

[ Mass Spectrum ]  
Data : DR228\_YR-F-278-F Date : 15-Dec-2022 16:32  
Sample : -  
Note : -  
Inlet : Direct Ion Mode : EI+  
Spectrum Type : Normal Ion [EF-Linear]  
RT : 0.74 min Scan# : 23  
BP : m/z 461.0424 Int. : 70.98  
Output m/z range : 454.2019 to 465.9436 Cut Level : 0.00 %

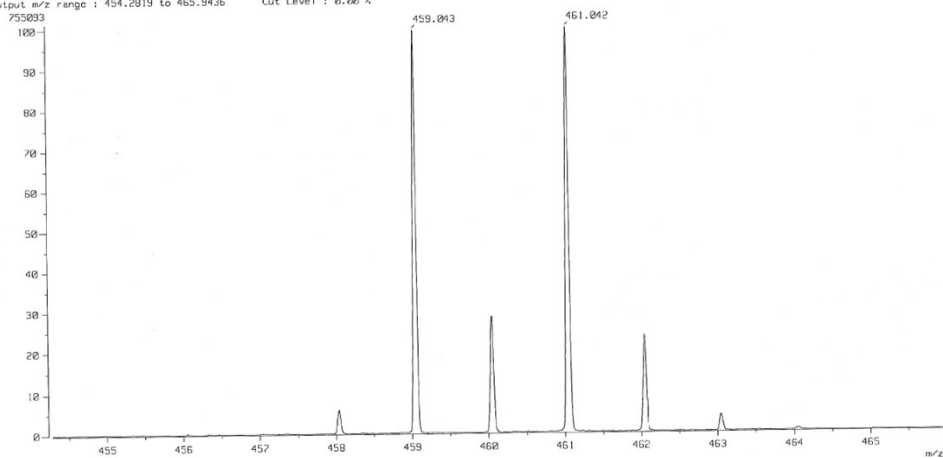

HRMS spectra of **3h**

[ Mass Spectrum ]  
Data : 2023-DR-465\_KYL-F-50-1 Date : 30-Mar-2023 15:07  
Sample : -  
Note : -  
Inlet : Direct Ion Mode : EI+  
Spectrum Type : Normal Ion [EF-Linear]  
RT : 0.60 min Scan# : 25  
BP : m/z 399.1232 Int. : 88.45  
Output m/z range : 369.0000 to 429.0000 Cut Level : 0.00 %

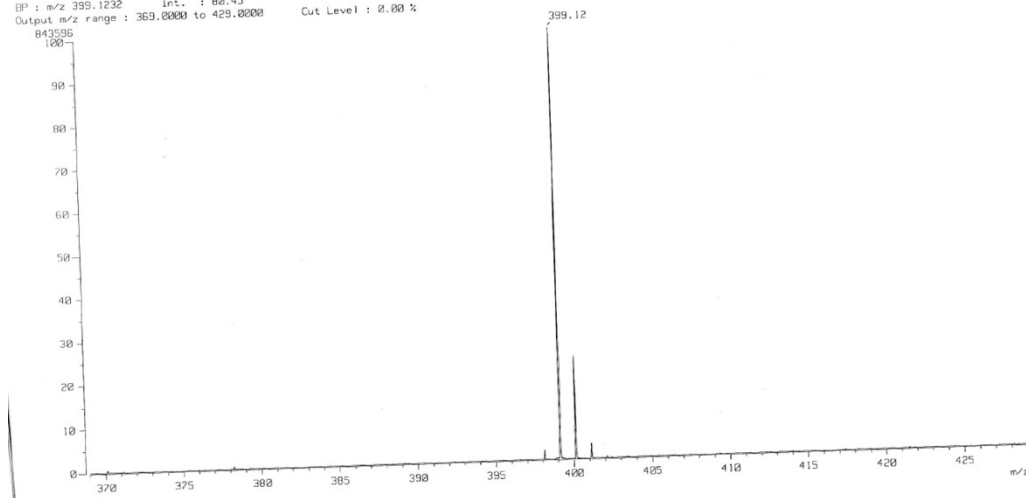

HRMS spectra of **3i**

[ Mass Spectrum ]  
Data : D32209\_YXR-R-262-R Date : 15-Dec-2022 16:36  
Sample : -  
Note : -  
Inlet : Direct Ion Mode : EI+  
Spectrum Type : Normal Ion [EF-Linear]  
RT : 1.00 min Scan# : 31  
BP : m/z 441.1535 Int. : 49.55  
Output m/z range : 435.3627 to 447.5875 Cut Level : 0.00 %

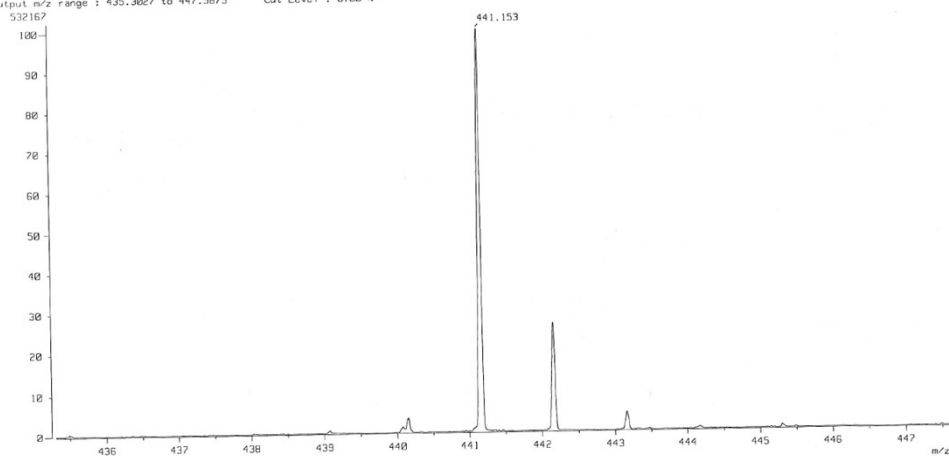

HRMS spectra of **3j**

[ Mass Spectrum ]  
Data : 2003-DR-465\_KYL-F-31 Date : 30-Mar-2023 15:12  
Sample : -  
Note : -  
Inlet : Direct Ion Mode : EI+  
Spectrum Type : Normal Ion [EF-Linear]  
RT : 0.96 min Scan# : 27  
BP : m/z 489.1745 Int. : 23.94  
Output m/z range : 483.5697 to 493.9852 Cut Level : 2.00 %

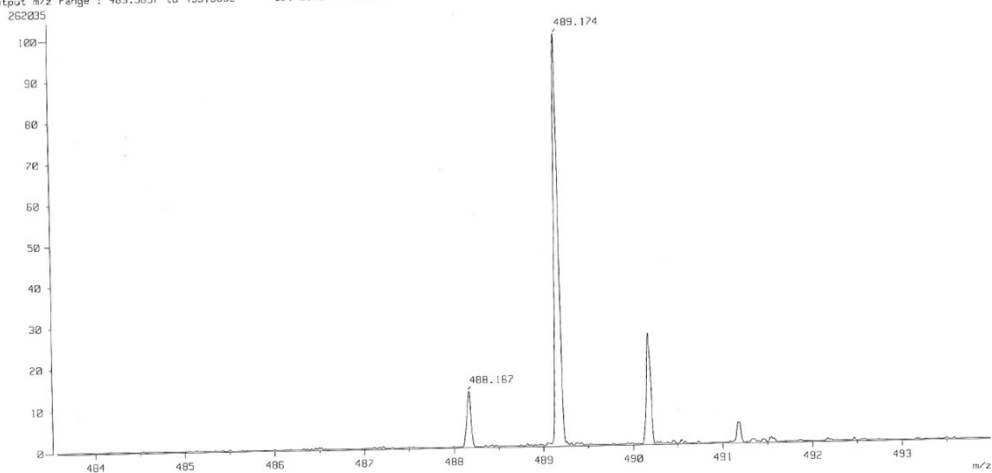

HRMS spectra of **3k**

[ Mass Spectrum ]  
Data : IP2200\_KYL-F-40-1 Date : 15-Dec-2022 15:58  
Sample: -  
Note : -  
Inlet : Direct Ion Mode : EI+  
Spectrum Type : Normal Ion [EF-Linear]  
RT : 0.77 min Scan# : 24  
BP : m/z 331.1169 Int. : 52.57  
Output m/z range : 325.3027 to 337.4985 Cut Level : 0.00 %

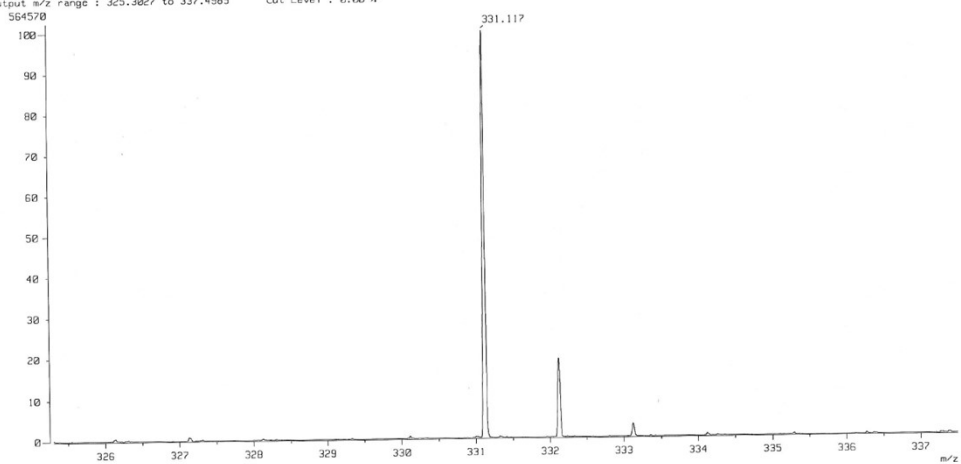

HRMS spectra of **31**

[ Mass Spectrum ]  
Data : 2023-DR-465\_YJR-R-290-1 Date : 31-Mar-2023 14:24  
Sample: -  
Note : -  
Inlet : Direct Ion Mode : EI+  
Spectrum Type : Normal Ion [EF-Linear]  
RT : 0.70 min Scan# : 20  
BP : m/z 381.1327 Int. : 76.12  
Output m/z range : 374.4125 to 387.8546 Cut Level : 0.00 %

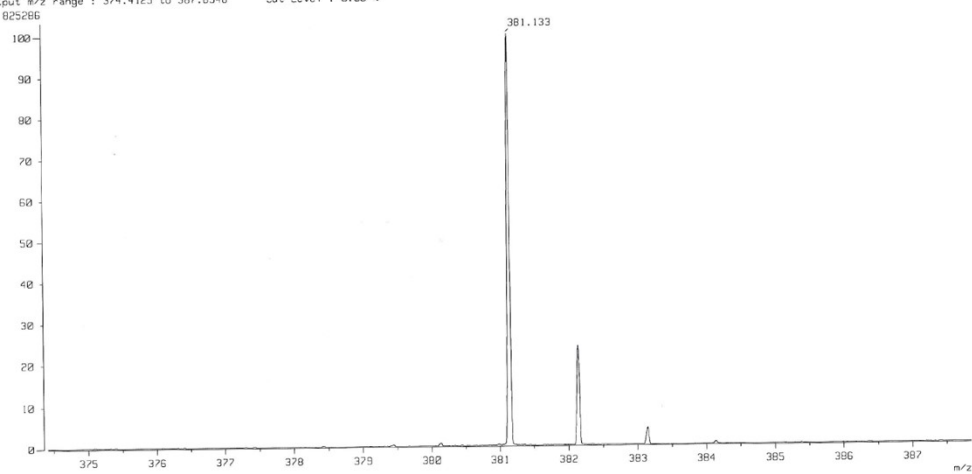

HRMS spectra of **3m**

[ Mass Spectrum ]  
Data : DR228B\_KYL-F-35-2 Date : 15-Dec-2022 15:48  
Sample : -  
Note : -  
Inlet : Direct Ion Mode : EI+  
Spectrum Type : Normal Ion [EF-Linear]  
RT : 0.84 min Scan# : 26  
BP : m/z 353.1014 Int. : 68.74  
Output m/z range : 348.0140 to 358.3412 Cut Level : 0.00 %

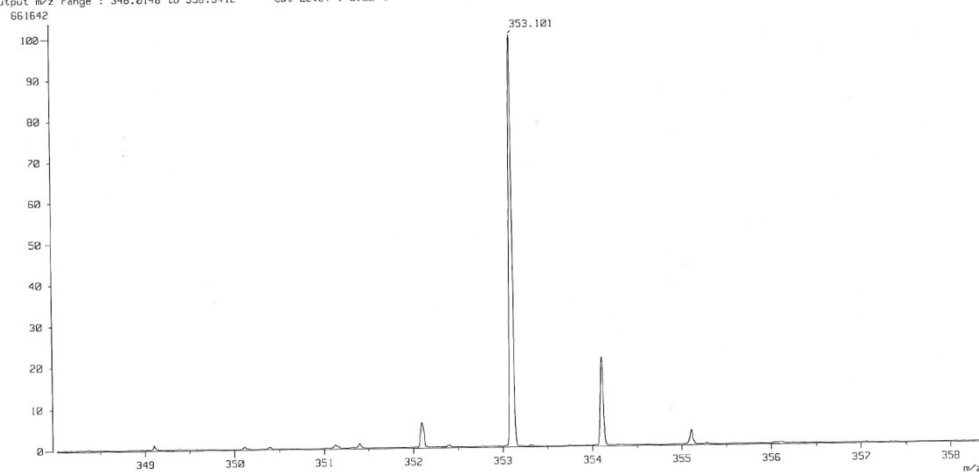

HRMS spectra of **3n**

[ Mass Spectrum ]  
Data : 2023-DR-465\_KYL-F-56-2 Date : 30-Mar-2023 15:33  
Sample : -  
Note : -  
Inlet : Direct Ion Mode : EI+  
Spectrum Type : Normal Ion [EF-Linear]  
RT : 0.59 min Scan# : 17  
BP : m/z 505.1635 Int. : 34.35  
Output m/z range : 499.4027 to 511.1424 Cut Level : 0.00 %

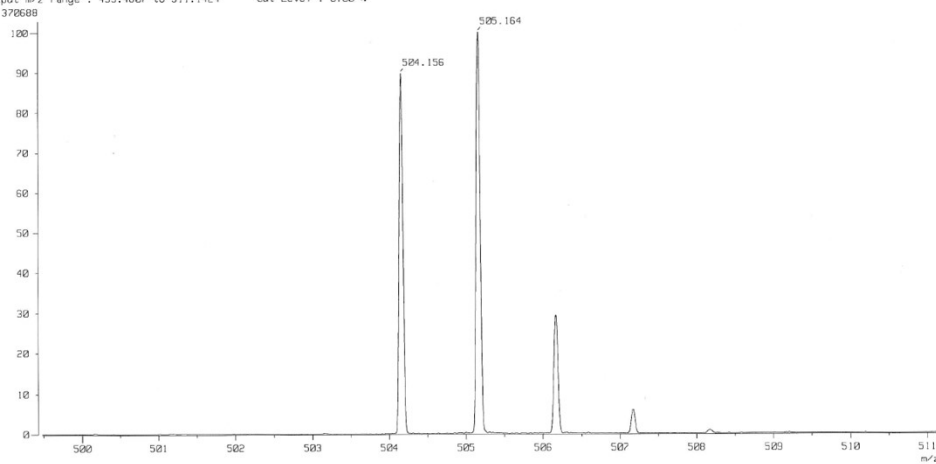

HRMS spectra of **3o**

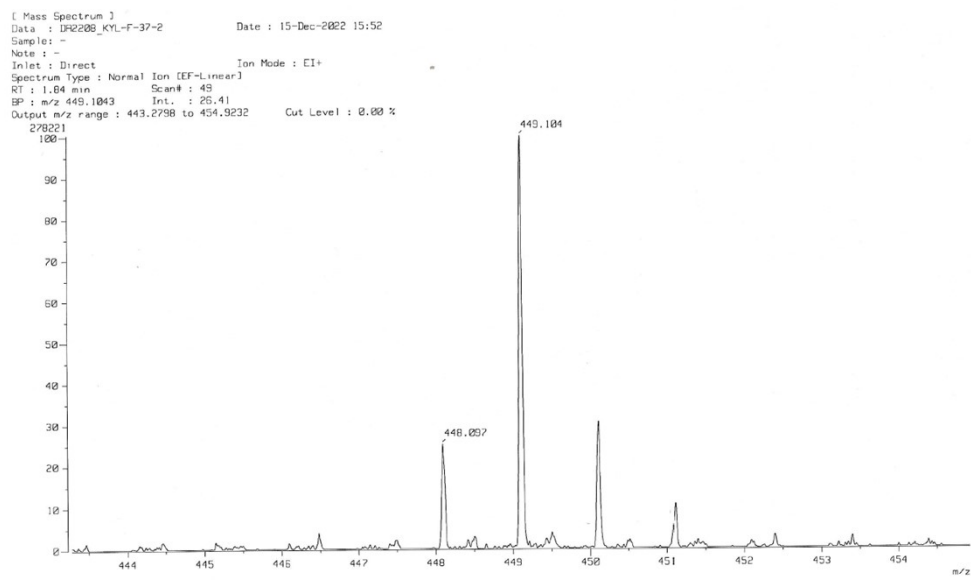

HRMS spectra of 3p

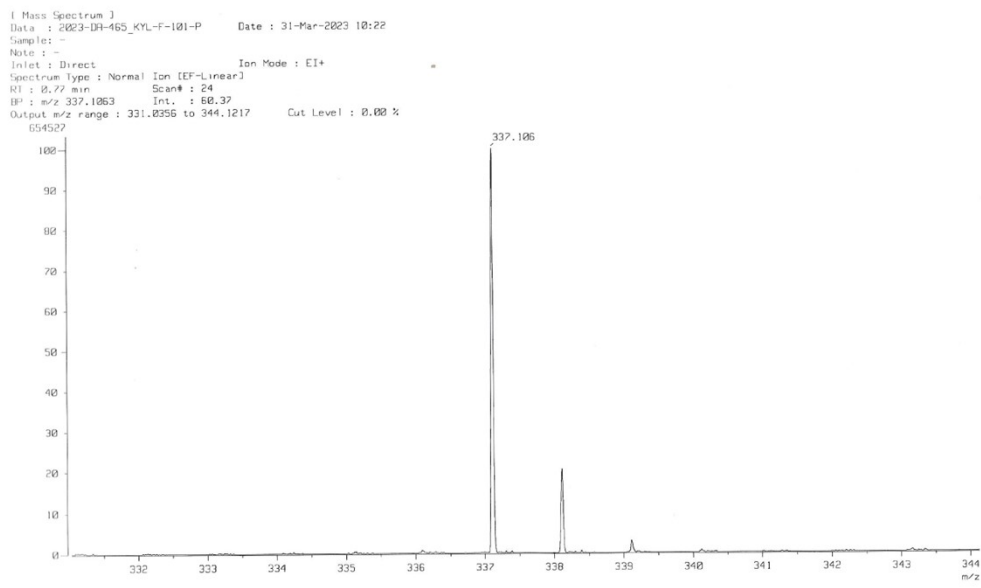

HRMS spectra of 3q

[ Mass Spectrum ]  
Data : DR2208\_KYL-F-8-2 Date : 15-Dec-2022 15:32  
Sample : -  
Note : -  
Inlet : Direct Ion Mode : EI+  
Spectrum Type : Normal Ion [EF-Linear]  
RT : 0.80 min Scan# : 25  
BP : m/z 395.1483 Int. : 69.25  
Output m/z range : 389.6598 to 400.4303 Cut Level : 0.00 %

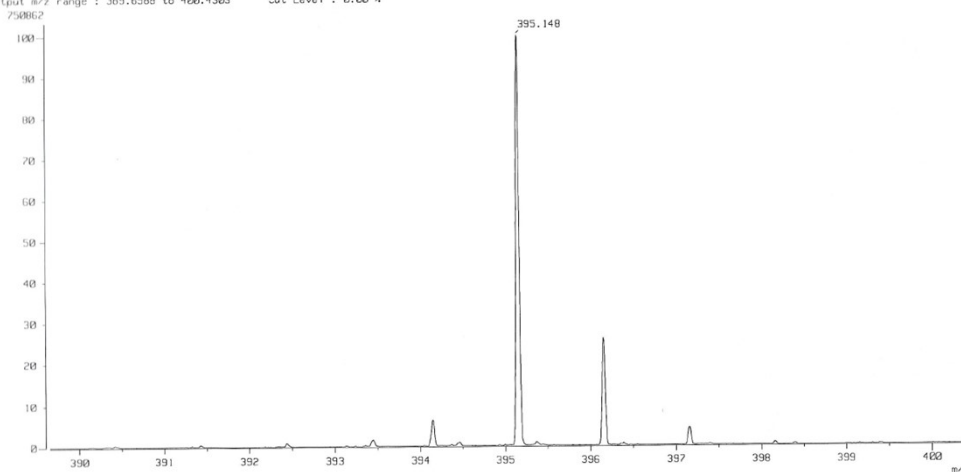

HRMS spectra of **3s**

[ Mass Spectrum ]  
Data : DR2208\_KYL-F-9-2 Date : 15-Dec-2022 15:37  
Sample : -  
Note : -  
Inlet : Direct Ion Mode : EI+  
Spectrum Type : Normal Ion [EF-Linear]  
RT : 0.97 min Scan# : 38  
BP : m/z 395.1479 Int. : 55.28  
Output m/z range : 389.6598 to 400.6083 Cut Level : 0.00 %

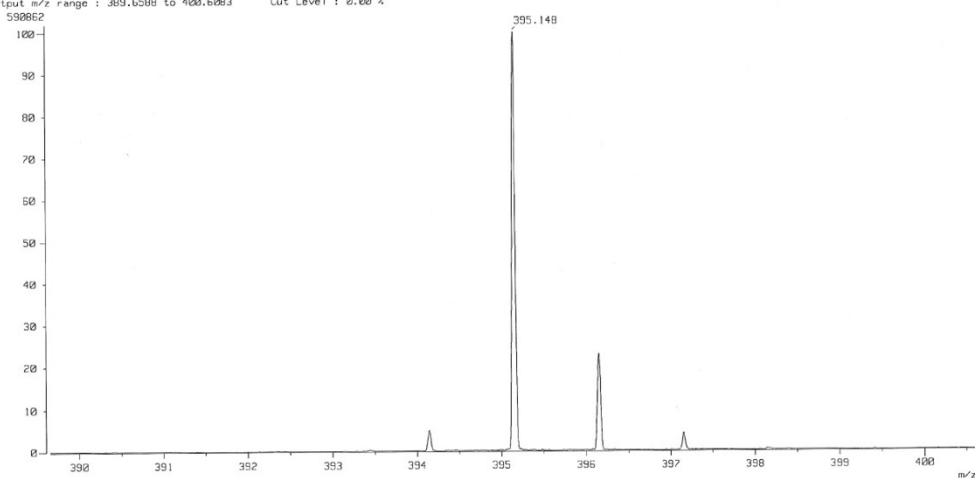

HRMS spectra of **3t**



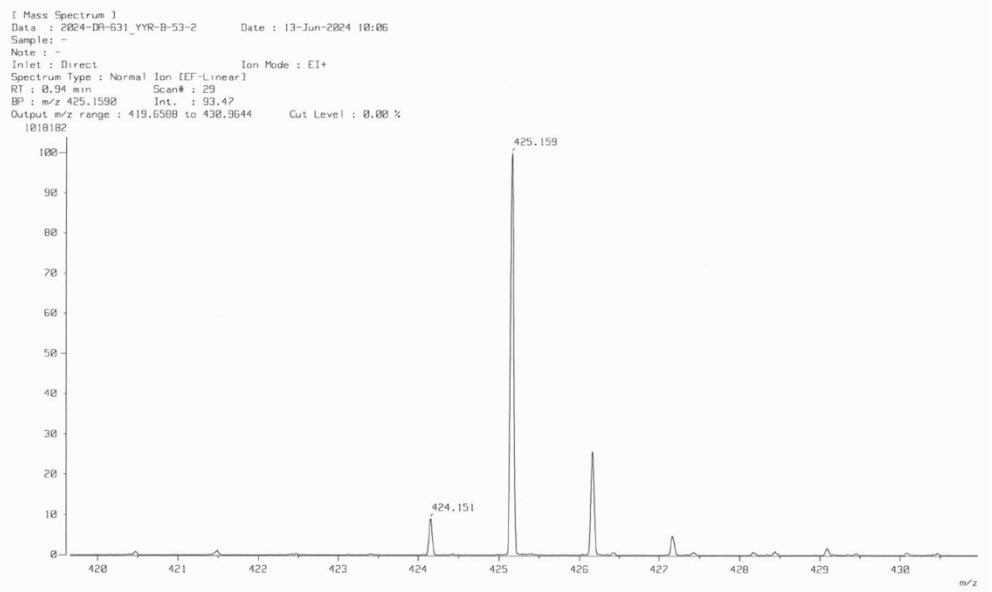

HRMS spectra of **3u**

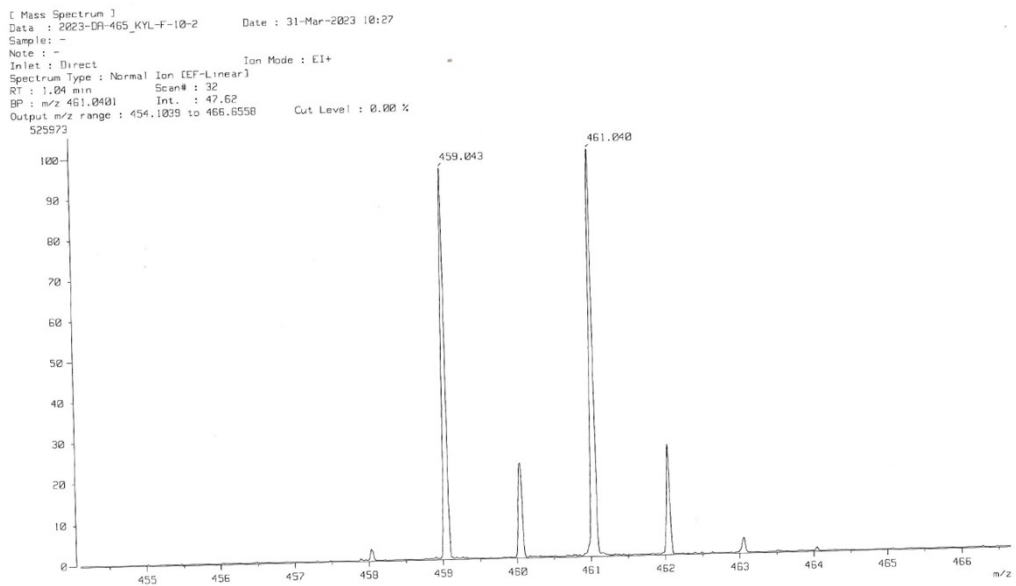

HRMS spectra of **3v**

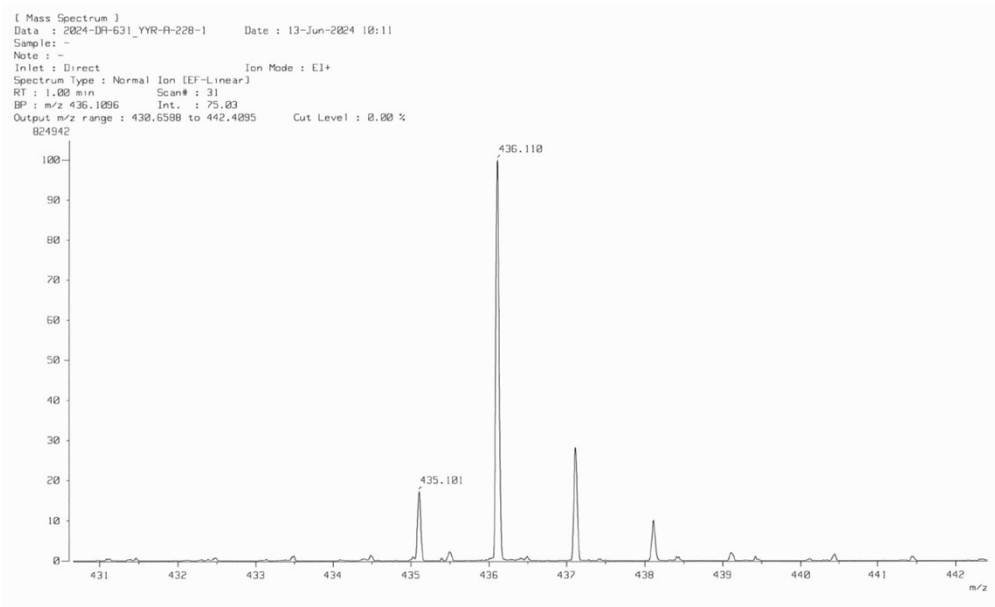

HRMS spectra of **3w**

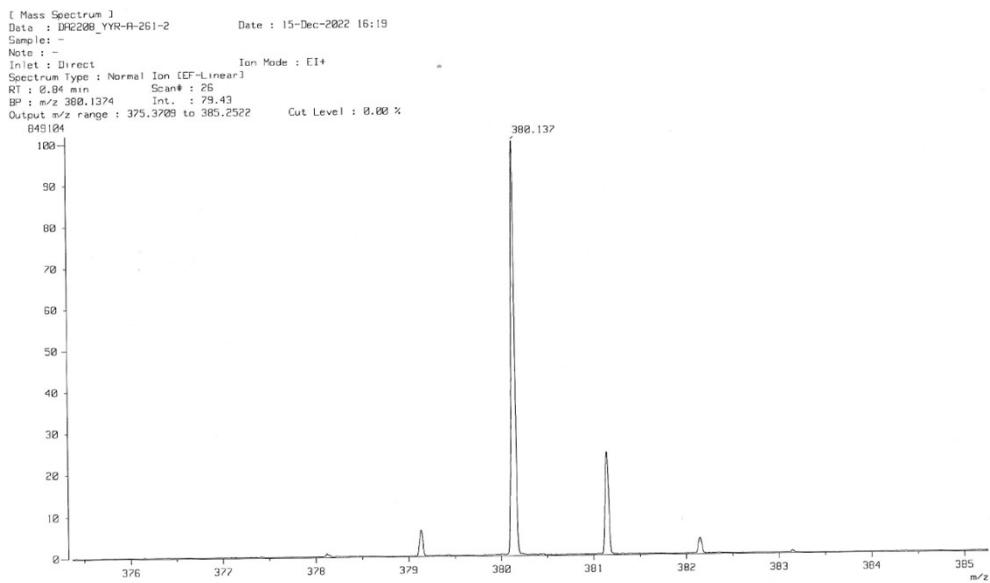

HRMS spectra of **3x**

[ Mass Spectrum ]  
Date : 2024-09-04 14:27  
Sample : -  
Note : -  
Inlet : Direct Ion Mode : E1+  
Spectrum Type : Normal Ion [CF-Linear]  
RT : 1.04 min Scan# : 26  
BP : m/z 569.2013 Int. : 52.32  
Output m/z range : 562.5929 to 576.7305 Cut Level : 0.00 %  
575522

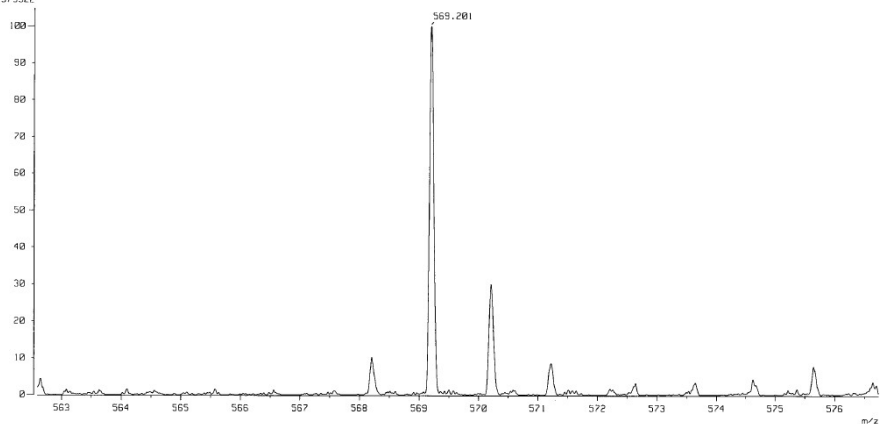

HRMS spectra of 3y

[ Mass Spectrum ]  
Date : 2023-03-31 10:38  
Sample : -  
Note : -  
Inlet : Direct Ion Mode : E1+  
Spectrum Type : Normal Ion [CF-Linear]  
RT : 0.77 min Scan# : 24  
BP : m/z 381.1327 Int. : 89.63  
Output m/z range : 374.9466 to 388.1217 Cut Level : 0.00 %  
971774

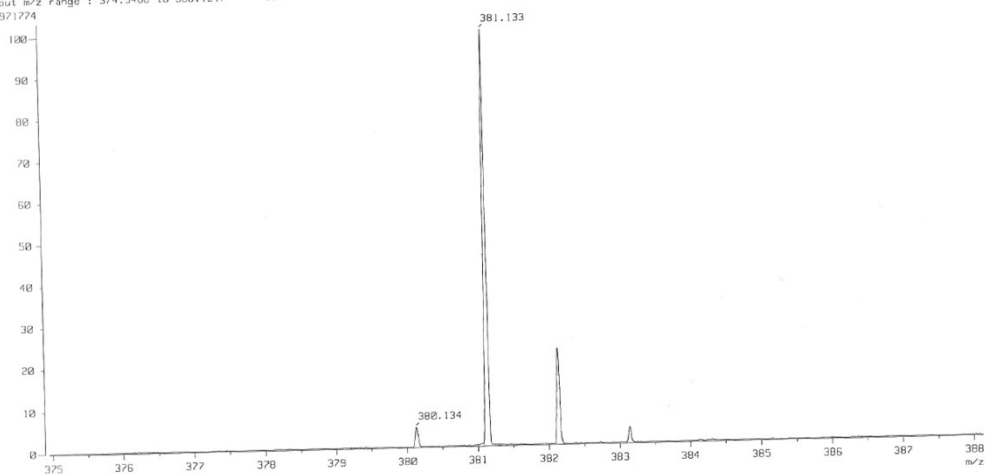

HRMS spectra of 4a

[ Mass Spectrum ]  
Date : 2023-DR-465\_YZR-R-292-D Date : 31-Mar-2023 14:28  
Sample : -  
Note : -  
Inlet : Direct Ion Mode : EI+  
Spectrum Type : Normal Ion (EF-Linear)  
RT : 1.00 min Scan# : 31  
BP : m/z 395.1479 Int. : 40.21  
Output m/z range : 389.3627 to 400.8644 Cut Level : 0.00 %

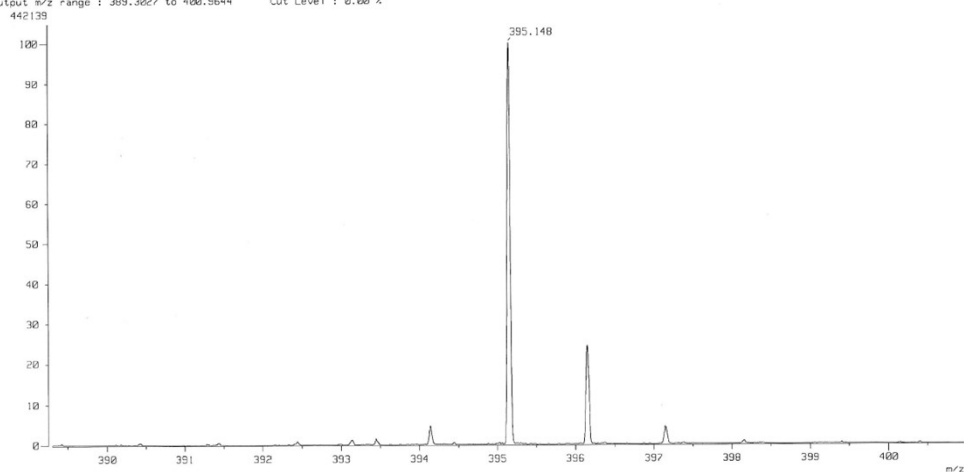

HRMS spectra of **4b**

[ Mass Spectrum ]  
Date : 2023-DR-465\_YZR-R-293-D Date : 31-Mar-2023 14:32  
Sample : -  
Note : -  
Inlet : Direct Ion Mode : EI+  
Spectrum Type : Normal Ion (EF-Linear)  
RT : 0.90 min Scan# : 28  
BP : m/z 411.1427 Int. : 49.55  
Output m/z range : 405.3917 to 417.5875 Cut Level : 0.00 %

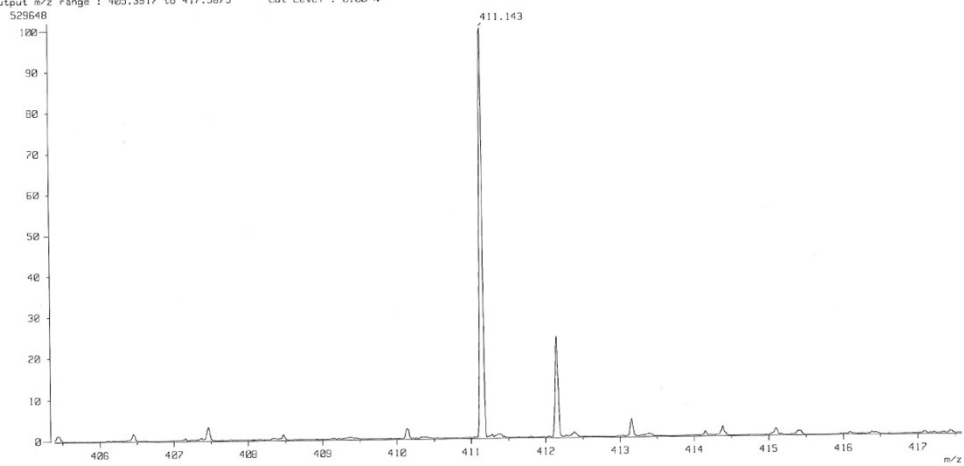

HRMS spectra of **4c**

[ Mass Spectrum ]  
Data : 2023-03-31\_465\_YR-A-300-1 Date : 31-Mar-2023 14:36  
Sample: -  
Note: -  
Inlet: Direct Ion Mode: EI+  
Spectrum Type: Normal Ion [EF-Linear]  
RT: 0.94 min Scan#: 29  
BP: m/z 415.0937 Int.: 72.35  
Output m/z range: 408.6795 to 422.5668 Cut Level: 0.00 %

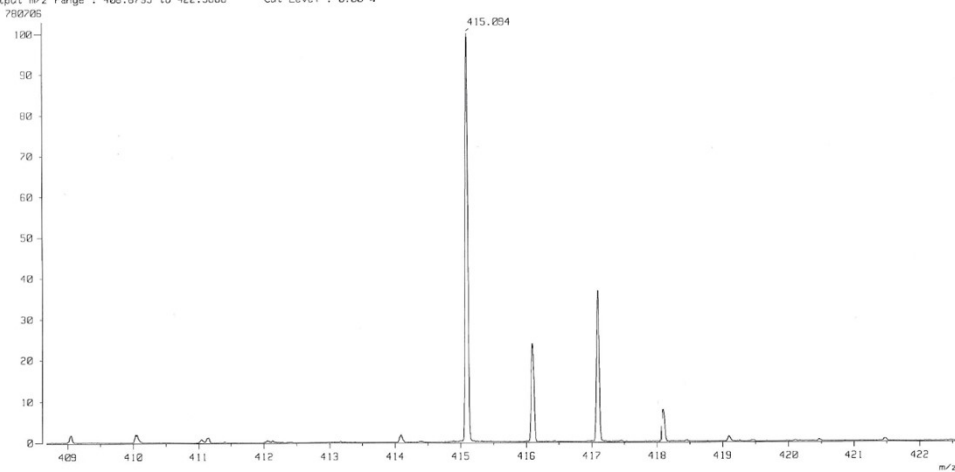

HRMS spectra of **4d**

[ Mass Spectrum ]  
Data : 2023-03-31\_465\_YR-B-29-D Date : 31-Mar-2023 14:40  
Sample: -  
Note: -  
Inlet: Direct Ion Mode: EI+  
Spectrum Type: Normal Ion [EF-Linear]  
RT: 0.90 min Scan#: 28  
BP: m/z 449.1195 Int.: 62.61  
Output m/z range: 443.1246 to 456.4777 Cut Level: 0.00 %

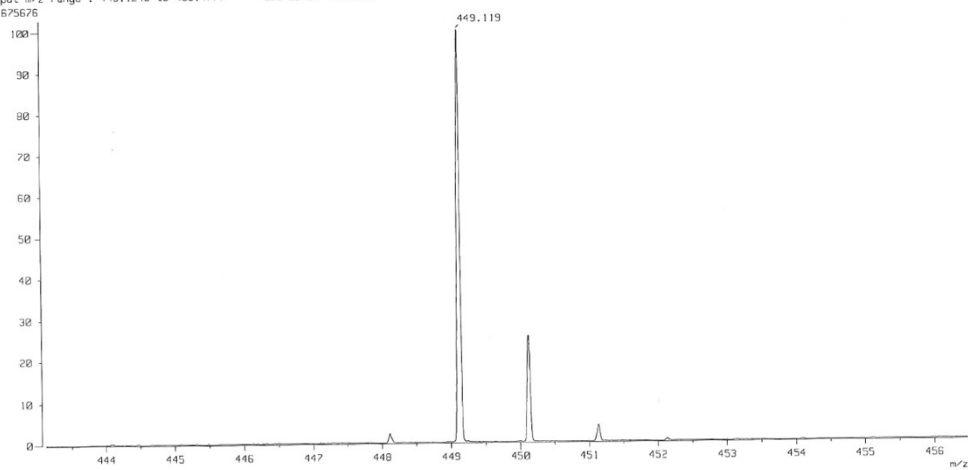

HRMS spectra of **4e**

[ Mass Spectrum ]  
Data : 2023-DR-465\_YR-B-31-D Date : 31-Mar-2023 14:48  
Sample : -  
Note : -  
Inlet : Direct Ion Mode : EI+  
Spectrum Type : Normal Ion [EF-Linear]  
RT : 1.24 min Scan# : 38  
BP : m/z 426.1174 Int. : 43.69  
Output m/z range : 419.7925 to 433.1682 Cut Level : 0.00 %  
478189

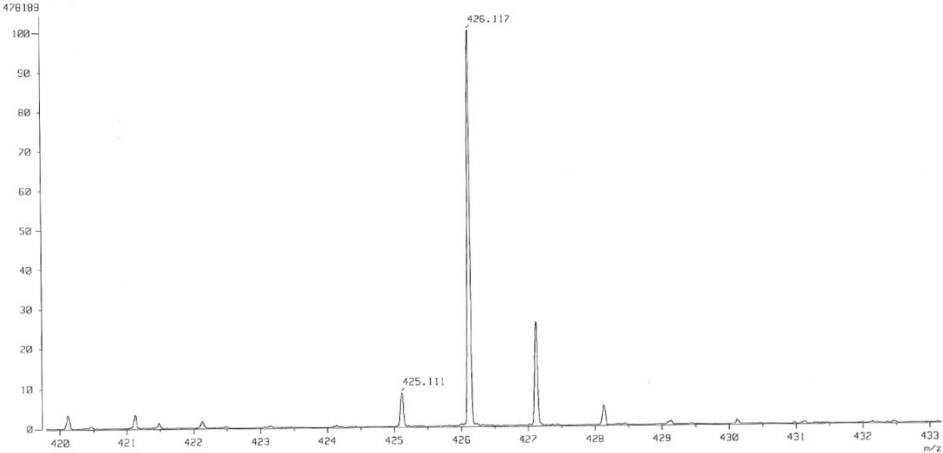

HRMS spectra of **4f**

[ Mass Spectrum ]  
Data : 2023-DR-465\_YR-R-276-D Date : 31-Mar-2023 14:52  
Sample : -  
Note : -  
Inlet : Direct Ion Mode : EI+  
Spectrum Type : Normal Ion [EF-Linear]  
RT : 0.87 min Scan# : 27  
BP : m/z 411.1428 Int. : 57.73  
Output m/z range : 403.6783 to 418.4777 Cut Level : 0.00 %  
625933

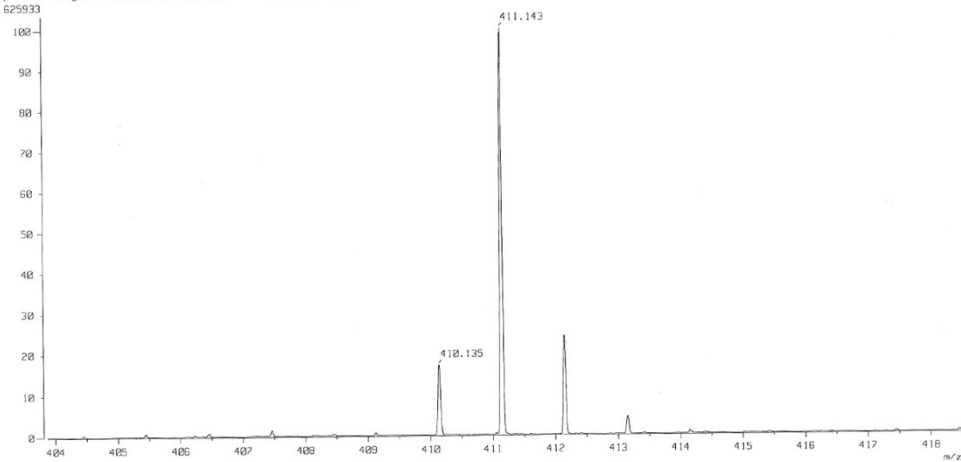

HRMS spectra of **4g**

[ Mass Spectrum ]  
Data : 2023-DR-577\_YJR-B-4-D Date : 17-Apr-2023 16:44  
Sample : -  
Note : -  
Inlet : Direct Ion Mode : EI+  
Spectrum Type : Normal Ion [EF-Linear]  
RT : 0.98 min Scan# : 29  
BP : m/z 461.0398 Int. : 78.54  
Output m/z range : 454.3641 to 467.4253 Cut Level : 0.00 %  
891689

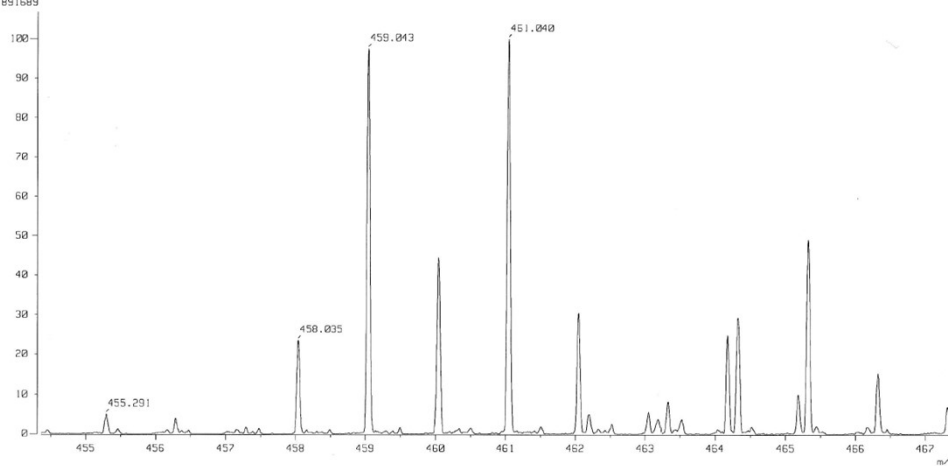

HRMS spectra of **4h**

[ Mass Spectrum ]  
Data : 2023-DR-577\_YJR-A-295-D Date : 17-Apr-2023 16:58  
Sample : -  
Note : -  
Inlet : Direct Ion Mode : EI+  
Spectrum Type : Normal Ion [EF-Linear]  
RT : 1.00 min Scan# : 31  
BP : m/z 441.1534 Int. : 43.65  
Output m/z range : 434.5855 to 449.1982 Cut Level : 0.00 %  
471007

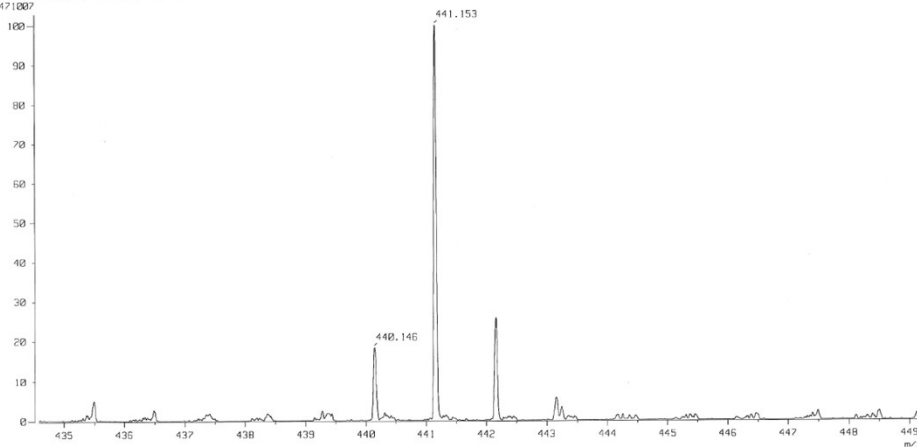

HRMS spectra of **4j**

[ Mass Spectrum ]  
Date : 2023-03-17\_YR-B-25-D Date : 17-Apr-2023 17:02  
Sample : -  
Note : -  
Inlet : Direct Ion Mode : EI+  
Spectrum Type : Normal Ion [EF-Linear]  
RT : 0.50 min Scan# : 28  
BP : m/z 472.1716 Int. : 81.71  
Output m/z range : 463.7615 to 493.4867 Cut Level : 0.00 %  
896934

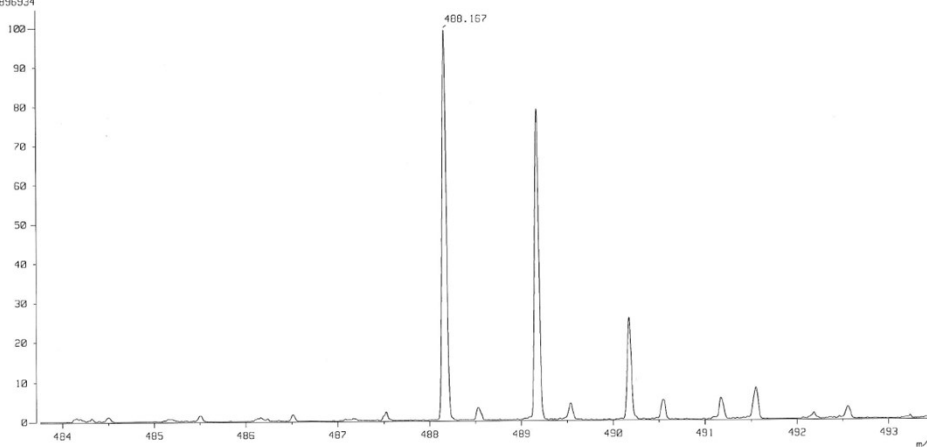

HRMS spectra of **4k**

[ Mass Spectrum ]  
Date : 2023-03-31\_YR-B-26-2 Date : 31-Mar-2023 15:02  
Sample : -  
Note : -  
Inlet : Direct Ion Mode : EI+  
Spectrum Type : Normal Ion [EF-Linear]  
RT : 0.70 min Scan# : 22  
BP : m/z 331.1171 Int. : 41.74  
Output m/z range : 323.6783 to 338.4777 Cut Level : 0.00 %  
450400

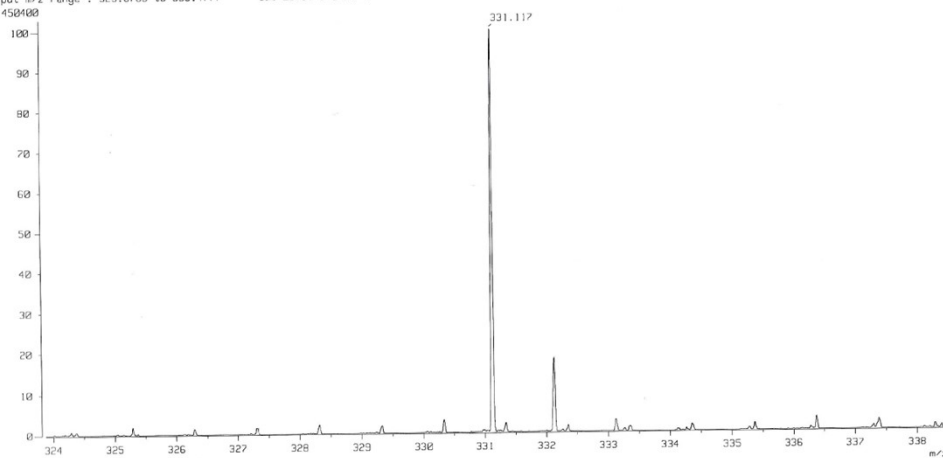

HRMS spectra of **4l**



[ Mass Spectrum ]  
Data : 2023-03-31-465\_YJR-B-23-D Date : 31-Mar-2023 15:06  
Sample : -  
Note : -  
Inlet : Direct Ion Mode : EI+  
Spectrum Type : Normal Ion [EF-Linear]  
RT : 0.84 min Scan# : 26  
BP : m/z 381.1328 Int. : 64.82  
Output m/z range : 374.8576 to 387.9436 Cut Level : 0.00 %

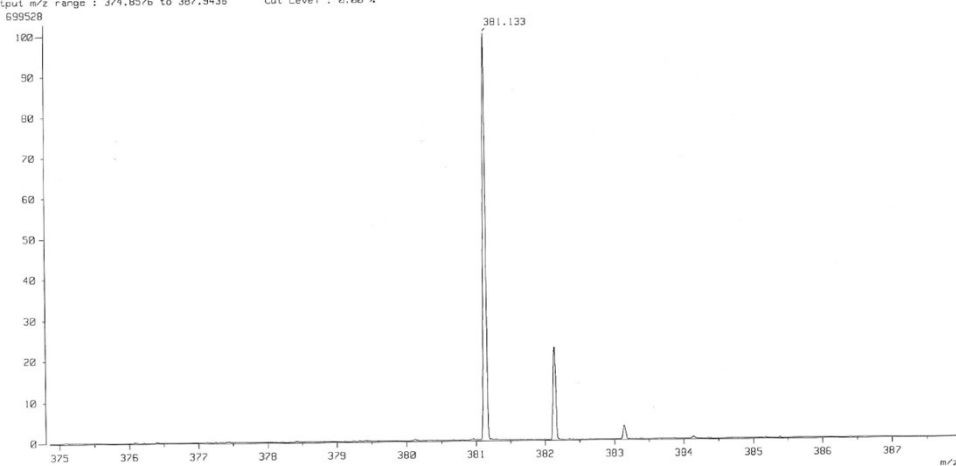

HRMS spectra of **4m**

[ Mass Spectrum ]  
Data : 2023-03-31-465\_YJR-B-27-D Date : 31-Mar-2023 15:11  
Sample : -  
Note : -  
Inlet : Direct Ion Mode : EI+  
Spectrum Type : Normal Ion [EF-Linear]  
RT : 0.97 min Scan# : 30  
BP : m/z 353.1008 Int. : 79.00  
Output m/z range : 345.4332 to 360.7448 Cut Level : 0.00 %

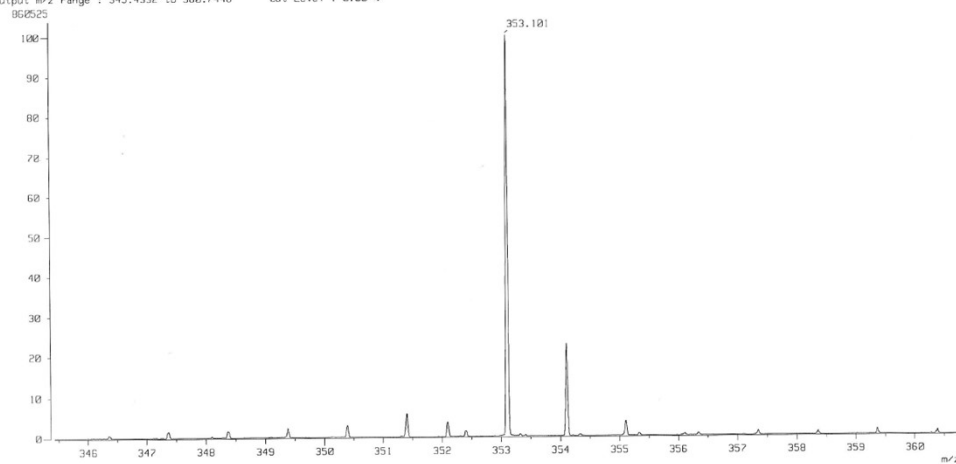

HRMS spectra of **4n**

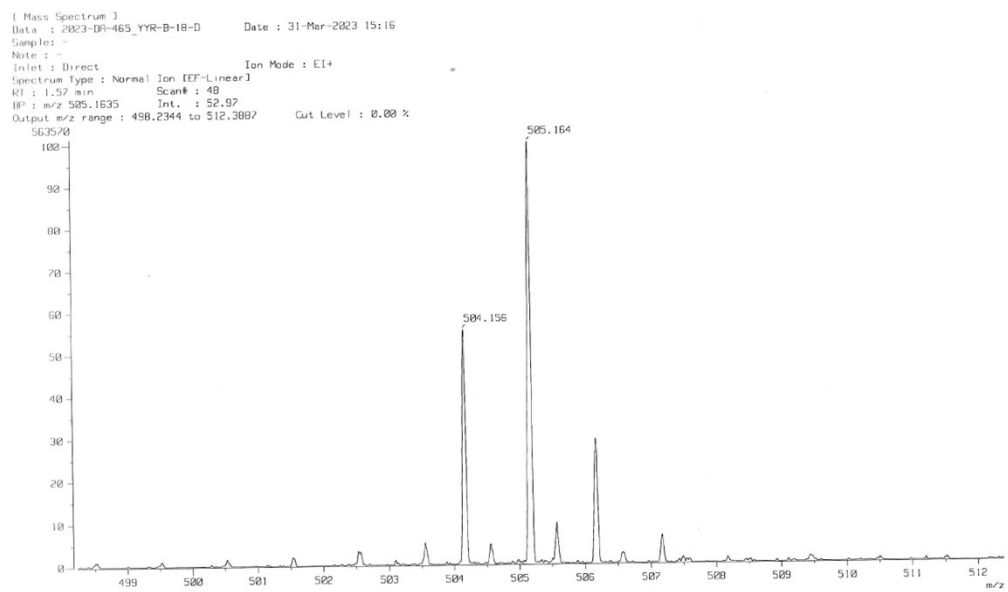

HRMS spectra of **4o**

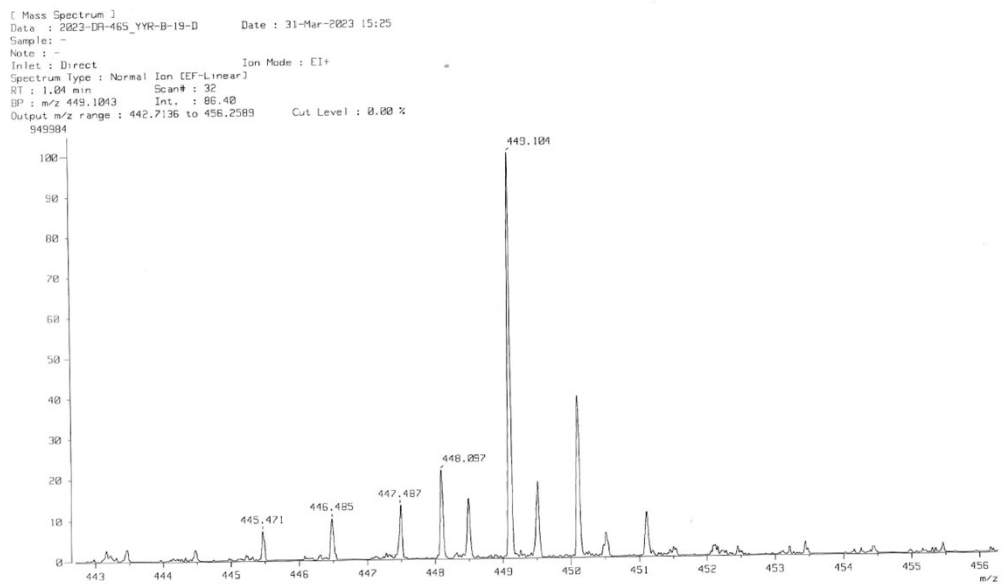

HRMS spectra of **4p**

[ Mass Spectrum ]  
Data : DF2208\_KYL-F-17-D Date : 15-Dec-2022 15:40  
Sample : -  
Note : -  
Inlet : Direct Ion Mode : EI+  
Spectrum Type : Normal Ion [EF-Linear]  
RT : 0.77 min Scan# : 24  
BP : m/z 395.1478 Int. : 80.75  
Output m/z range : 389.3917 to 401.2315 Cut Level : 0.00 %  
875549

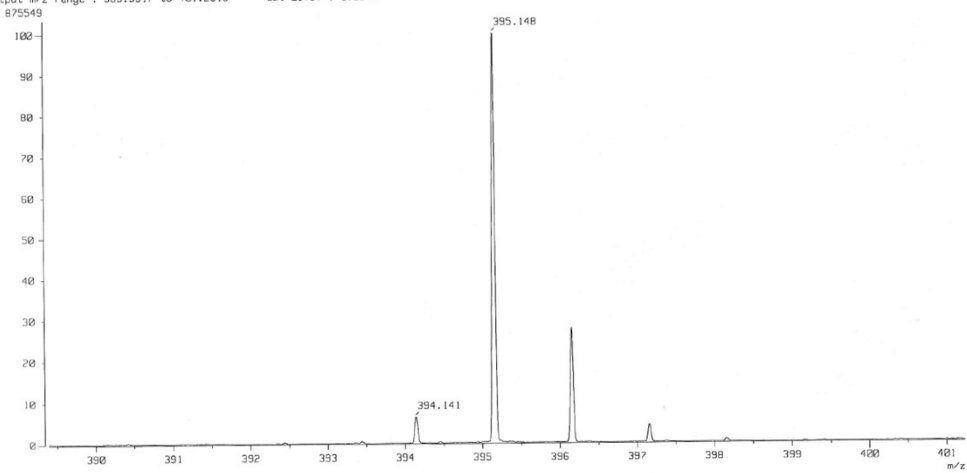

HRMS spectra of **4q**

[ Mass Spectrum ]  
Data : 2024-DA-1223\_B-65-2 Date : 27-Nov-2024 10:36  
Instrument : MStation  
Sample : -  
Inlet : Direct Ion Mode : FAB+  
Spectrum Type : Normal Ion [MF-Linear]

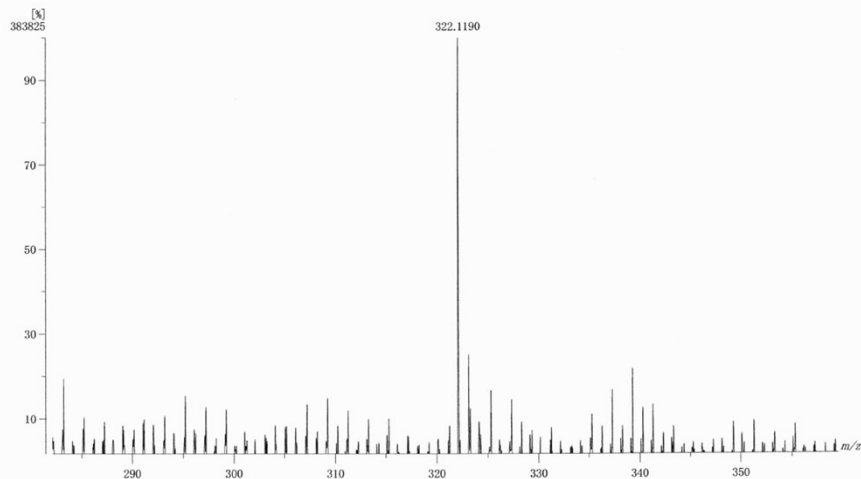

HRMS spectra of **4r**

[ Mass Spectrum ]  
Data : D12208\_KYL-F-18-D Date : 15-Dec-2022 15:44  
Sample : -  
Note : -  
Inlet : Direct Ion Mode : EI+  
Spectrum Type : Normal Ion [EF-Linear]  
RT : 0.94 min Scan# : 26  
BP : m/z 395.1482 Int. : 81.92  
Output m/z range : 389.5597 to 400.7864 Cut Level : 0.00 %

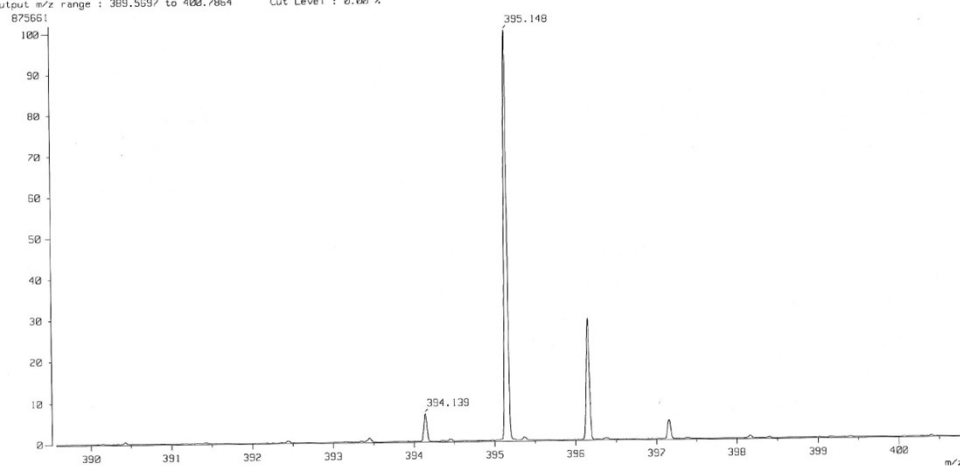

HRMS spectra of **4s**

[ Mass Spectrum ]  
Data : 2223-DR-577\_YR-B-61-D Date : 17-Apr-2023 16:54  
Sample : -  
Note : -  
Inlet : Direct Ion Mode : EI+  
Spectrum Type : Normal Ion [EF-Linear]  
RT : 1.20 min Scan# : 37  
BP : m/z 425.1585 Int. : 93.01  
Output m/z range : 418.5231 to 432.4318 Cut Level : 0.00 %

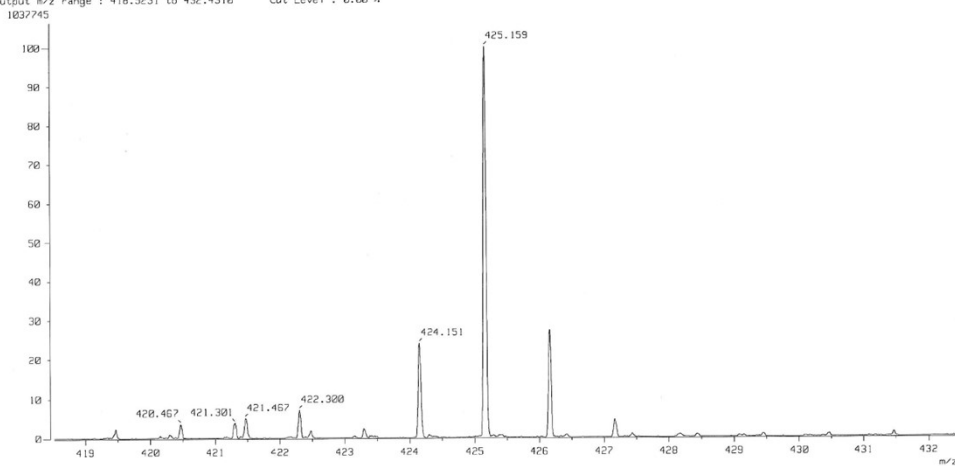

HRMS spectra of **4t**

[ Mass Spectrum ]  
Data : 2023-DR-465\_YR-B-37-6 Date : 31-Mar-2023 15:30  
Sample : -  
Note : -  
Inlet : Direct Ion Mode : E1+  
Spectrum Type : Normal Ion (EF-Linear)  
RT : 0.47 min Scan# : 15  
BP : m/z 436.1095 Int. : 54.92  
Output m/z range : 428.9674 to 443.8338 Cut Level : 0.00 %

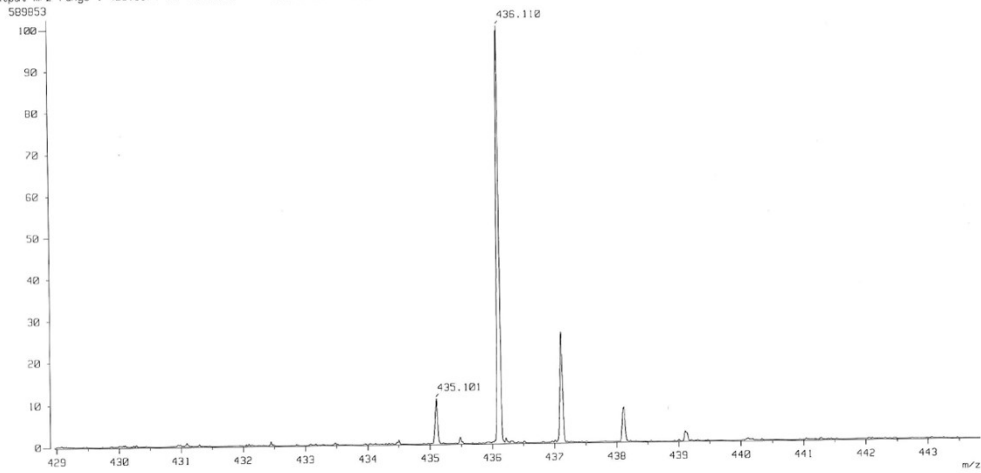

HRMS spectra of 4u

[ Mass Spectrum ]  
Data : 2024-DR-934\_CS4-D30 Date : 04-Sep-2024 14:33  
Sample : -  
Note : -  
Inlet : Direct Ion Mode : E1+  
Spectrum Type : Normal Ion (EF-Linear)  
RT : 1.13 min Scan# : 28  
BP : m/z 569.2010 Int. : 71.83  
Output m/z range : 561.1421 to 576.4089 Cut Level : 0.00 %

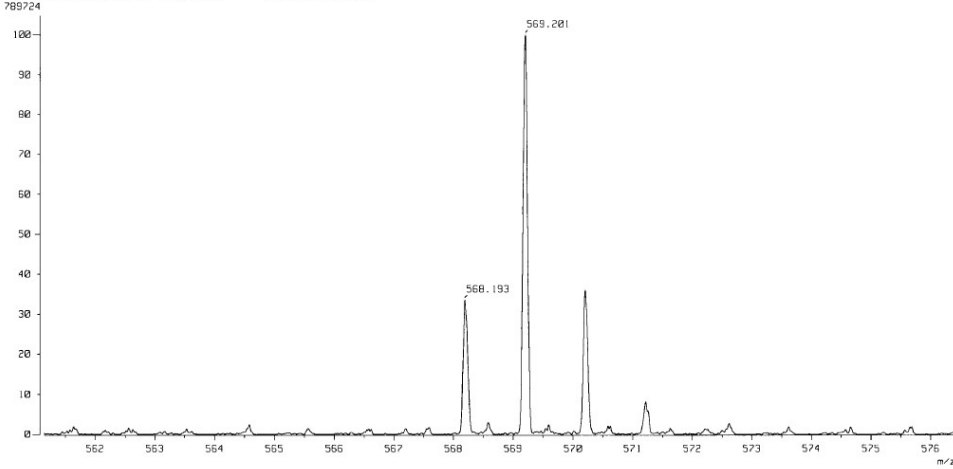

HRMS spectra of 4x

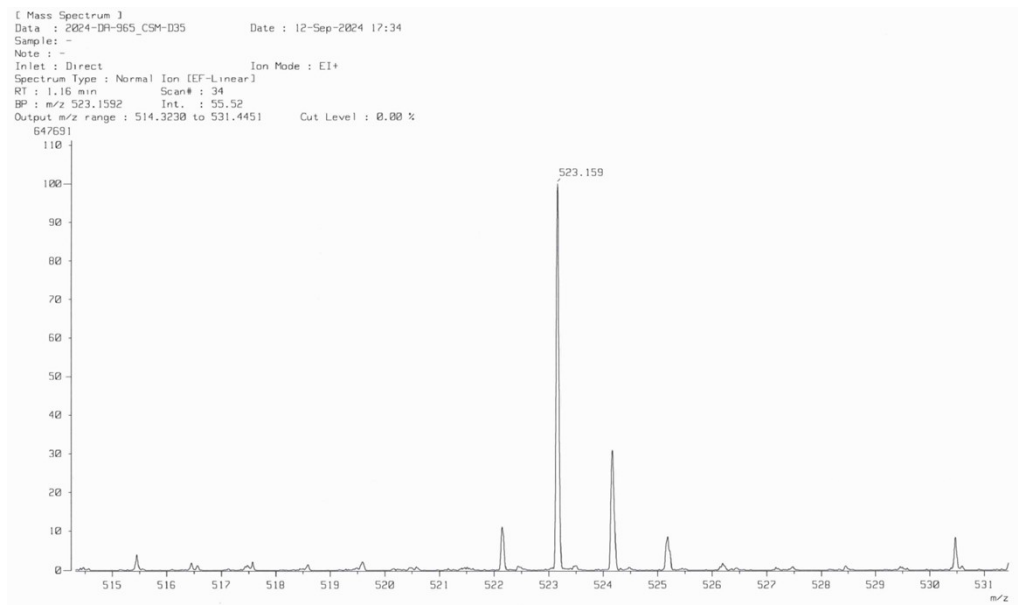

HRMS spectra of **6**

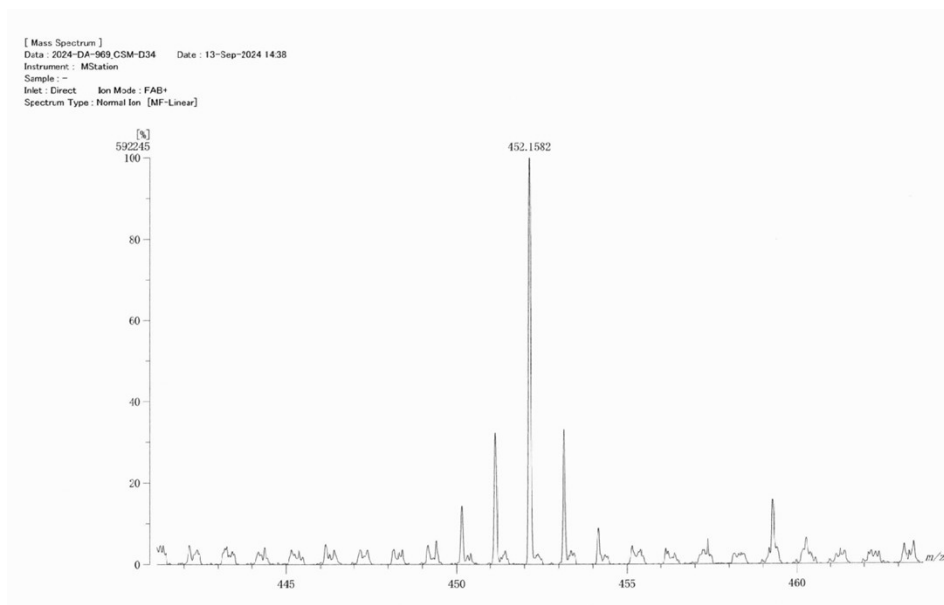

HRMS spectra of **6'**

[ Mass Spectrum ]  
Data : 2023-04-17\_377\_KYL-F-98-1 Date : 17-Apr-2023 16:50  
Sample : -  
Note : -  
Inlet : Direct Ion Mode : E1+  
Spectrum type : Normal Ion [E1-Linear]  
RT : 0.57 min Scan# : 18  
BP : m/z 379.1416 Int. : 74.29  
Output m/z range : 373.2136 to 385.2315 Cut Level : 0.00 %

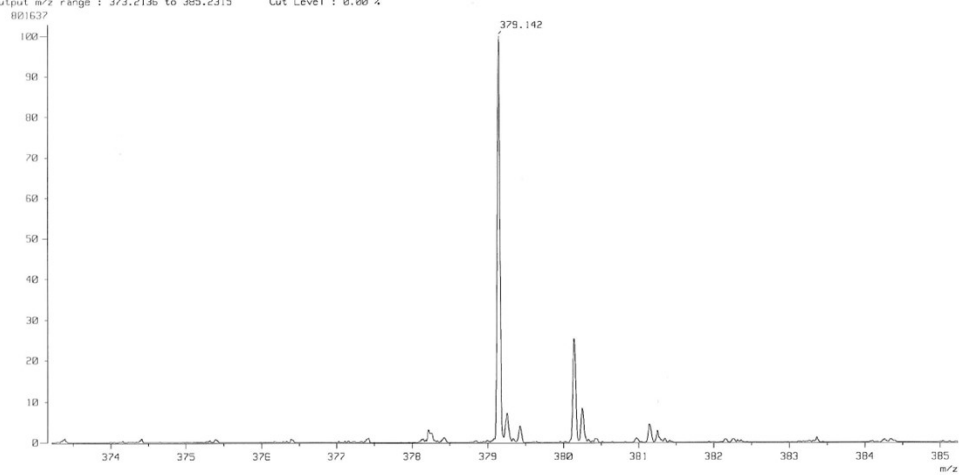

HRMS spectra of 11
